# Supplementary material for: PLGA/chitosan–heparin composite microparticles prepared with microfluidics for the construction of hMSC aggregates
Source: Royal Society of Chemistry journal article supplement (doi:10.1039/d0tb01593h), 2020-01-01
Supplement: d0tb01593h3.xlsx [file d0tb01593h3.xlsx]

## Sheet: Sheet1
ProbeName	FC (abs) [MSC/P/C-h 2:1] vs [MSC]	FC [MSC/P/C-h 2:1] vs [MSC]	Log FC [MSC/P/C-h 2:1] vs [MSC]	Regulation [MSC/P/C-h 2:1] vs [MSC]	MSC:gProcessedSignal(raw)	MSC/P/C-h 2:1:gProcessedSignal(raw)	MSC:gProcessedSignal(normalized)	MSC/P/C-h 2:1:gProcessedSignal(normalized)	MSC:gFEFlags	MSC/P/C-h 2:1:gFEFlags	ControlType	PrimaryAccession	RefSeqAccession	GenbankAccession	UniGeneID	EntrezGeneID	GeneSymbol	GeneName	EnsemblID	TIGRID	GO	Description	GenomicCoordinates	Cytoband	Sequence_x000D_
A_33_P3258467	3.17095	3.17095	1.66491	up	8192.5	16674.5	1.9672	3.63211	Detected	Detected	0	NM_178313	NM_178313	NM_178313	Hs.503178	6711	SPTBN1	"spectrin, beta, non-erythrocytic 1"	ENST00000333896	THC2552645	GO:0000281(cytokinesis after mitosis)|GO:0003779(actin binding)|GO:0005200(structural constituent of cytoskeleton)|GO:0005515(protein binding)|GO:0005516(calmodulin binding)|GO:0005543(phospholipid binding)|GO:0005730(nucleolus)|GO:0005737(cytoplasm)|GO:0005829(cytosol)|GO:0007009(plasma membrane organization)|GO:0007182(common-partner SMAD protein phosphorylation)|GO:0007184(SMAD protein import …	"Homo sapiens spectrin, beta, non-erythrocytic 1 (SPTBN1), transcript variant 2, mRNA [NM_178313]"	chr2:54889385-54889444	hs|2p16.2	GTGTGCTGTCTGTTGGCATGCTTAAAGCACATGTCCATTAAAATTCATTTTGTTCCTTTT
A_23_P92196	32.7434	32.7434	5.03313	up	12.1582	255.53	-7.42902	-2.39589	Not Detected	Detected	0	NM_032579	NM_032579	NM_032579	Hs.307047	84666	RETNLB	resistin like beta	ENST00000295755	THC2479326	GO:0003674(molecular_function)|GO:0005179(hormone activity)|GO:0005575(cellular_component)|GO:0005576(extracellular region)|GO:0008283(cell proliferation)	"Homo sapiens resistin like beta (RETNLB), mRNA [NM_032579]"	chr3:108475936-108475407	hs|3q13.13	AAGAAGATCAAGGATGTTCTCAACAGTCTAGAGTACAGTCCCTCTCCTATAAGCAAGAAG
A_33_P3309984	3.53207	3.53207	1.82052	up	142.948	324.082	-3.87354	-2.05302	Detected	Detected	0	NM_000221	NM_000221	NM_000221	Hs.567297	3795	KHK	ketohexokinase (fructokinase)	ENST00000260599		GO:0004454(ketohexokinase activity)|GO:0005524(ATP binding)|GO:0005634(nucleus)|GO:0005737(cytoplasm)|GO:0005829(cytosol)|GO:0005975(carbohydrate metabolic process)|GO:0006001(fructose catabolic process)|GO:0009405(pathogenesis)|GO:0044281(small molecule metabolic process)|GO:0046835(carbohydrate phosphorylation)|GO:0070062(extracellular vesicular exosome)|GO:0070873(regulation of glycogen metabo…	"Homo sapiens ketohexokinase (fructokinase) (KHK), transcript variant a, mRNA [NM_000221]"	chr2:27323555-27323614	hs|2p23.3	CCAATTCTGCTTGGCTACAGAATTATTGTGAGGATAAAATCATATATAAAATGCCCAGCA
A_33_P3311551	3.88403	3.88403	1.95756	up	679.994	1695.26	-1.62351	0.334045	Detected	Detected	0	AB097018		AB097018	Hs.647659	79971	WLS	wntless Wnt ligand secretion mediator		THC2484495	GO:0000139(Golgi membrane)|GO:0001707(mesoderm formation)|GO:0004871(signal transducer activity)|GO:0005515(protein binding)|GO:0005886(plasma membrane)|GO:0009948(anterior/posterior axis specification)|GO:0016021(integral to membrane)|GO:0016055(Wnt receptor signaling pathway)|GO:0017147(Wnt-protein binding)|GO:0030659(cytoplasmic vesicle membrane)|GO:0031852(mu-type opioid receptor binding)|GO:…	"Homo sapiens mRNA for putative NFkB activating protein, complete cds, clone: 373. [AB097018]"	chr1:68659604-68659545	hs|1p31.3	CTTTGAGCATTGCCCTCTTTGGGTTCTTTTTGAGCCAATTCTAATAAAAGTAAAAATGGT
A_23_P38537	3.37339	3.37339	1.7542	up	209.948	454.597	-3.319	-1.5648	Detected	Detected	0	NM_005557	NM_005557	NM_005557	Hs.655160	3868	KRT16	"keratin 16, type I"	ENST00000301653	THC2507751	GO:0002009(morphogenesis of an epithelium)|GO:0005200(structural constituent of cytoskeleton)|GO:0005515(protein binding)|GO:0005634(nucleus)|GO:0005856(cytoskeleton)|GO:0005882(intermediate filament)|GO:0006954(inflammatory response)|GO:0007010(cytoskeleton organization)|GO:0007568(aging)|GO:0008283(cell proliferation)|GO:0008544(epidermis development)|GO:0030216(keratinocyte differentiation)|GO…	"Homo sapiens keratin 16, type I (KRT16), mRNA [NM_005557]"	chr17:39767364-39767216	hs|17q21.2	CAGAGAAAAACCGCAGAGACGCTGAGACCTGGTTCCTGAGCAAGACCGAGGAGCTGAACA
A_33_P3336720	2.82534	2.82534	1.49842	up	173.298	314.277	-3.59577	-2.09735	Detected	Detected	0	NM_021175	NM_021175	NM_021175	Hs.8821	57817	HAMP	hepcidin antimicrobial peptide	ENST00000598398	THC2478089	GO:0005179(hormone activity)|GO:0005576(extracellular region)|GO:0006879(cellular iron ion homeostasis)|GO:0006955(immune response)|GO:0031640(killing of cells of other organism)|GO:0042742(defense response to bacterium)|GO:0045179(apical cortex)|GO:0050832(defense response to fungus)	"Homo sapiens hepcidin antimicrobial peptide (HAMP), mRNA [NM_021175]"	chr19:35775986-35776045	hs|19q13.12	ATTCCTGCTGCCCCAGAACATAGGTCTTGGAATAAAATGGCTGGTTCTTTTGTTTTCCAA
A_33_P3391603	4.19916	4.19916	2.0701	up	706.607	1904.53	-1.56812	0.501979	Detected	Detected	0	NM_001105209	NM_001105209	NM_001105209	Hs.654572	3910	LAMA4	"laminin, alpha 4"	ENST00000453937	THC2474803	GO:0005102(receptor binding)|GO:0005201(extracellular matrix structural constituent)|GO:0005515(protein binding)|GO:0005576(extracellular region)|GO:0005604(basement membrane)|GO:0005605(basal lamina)|GO:0005606(laminin-1 complex)|GO:0007155(cell adhesion)|GO:0030155(regulation of cell adhesion)|GO:0030198(extracellular matrix organization)|GO:0030334(regulation of cell migration)|GO:0031012(extr…	"Homo sapiens laminin, alpha 4 (LAMA4), transcript variant 5, mRNA [NM_001105209]"	chr6:112575046-112574987	hs|6q21	AGTTTCACCTGGGCTAGGTCAGTTCGGAAACTTGAAATAAAGAGTTTTCCTTTGTAAGTT
A_23_P19369	2.83588	2.83588	1.50379	up	210.006	382.267	-3.3186	-1.81481	Detected	Detected	0	NM_017640	NM_017640	NM_017640	Hs.649550	55604	LRRC16A	leucine rich repeat containing 16A	ENST00000476458	THC2471239	GO:0005634(nucleus)|GO:0005737(cytoplasm)|GO:0005829(cytosol)|GO:0007015(actin filament organization)|GO:0007596(blood coagulation)|GO:0016477(cell migration)|GO:0030027(lamellipodium)|GO:0030032(lamellipodium assembly)|GO:0030335(positive regulation of cell migration)|GO:0030838(positive regulation of actin filament polymerization)|GO:0031529(ruffle organization)|GO:0031941(filamentous actin)|GO…	"Homo sapiens leucine rich repeat containing 16A (LRRC16A), transcript variant 1, mRNA [NM_017640]"	chr6:25620055-25620114	hs|6p22.2	CATTTGATTTCTAAACATTCCTTCATATGCCTTTAATGAAAGCCAGCAATTATCCCATGG
A_33_P3388501	2.83674	2.83674	1.50423	up	173.208	315.38	-3.59653	-2.0923	Detected	Detected	0	NM_003465	NM_003465	NM_003465	Hs.201688	1118	CHIT1	chitinase 1 (chitotriosidase)	ENST00000491855	NP285492	GO:0000272(polysaccharide catabolic process)|GO:0004568(chitinase activity)|GO:0005615(extracellular space)|GO:0005764(lysosome)|GO:0006032(chitin catabolic process)|GO:0006955(immune response)|GO:0008061(chitin binding)|GO:0008843(endochitinase activity)|GO:0009617(response to bacterium)	"Homo sapiens chitinase 1 (chitotriosidase) (CHIT1), transcript variant 1, mRNA [NM_003465]"	chr1:203185861-203185802	hs|1q32.1	TTTTTTCTGGGTCTCCTGGGCTGCCCCTTTCACTTGCAAAATAAATCTTTGGTTTGTGCC
A_21_P0000058	3.04666	3.04666	1.60723	up	37.2264	72.7984	-5.81463	-4.20741	Not Detected	Detected	0	NM_001165978	NM_001165978	NM_001165978	Hs.469313	150696	PROM2	prominin 2	ENST00000317668	THC2473545	GO:0001934(positive regulation of protein phosphorylation)|GO:0005887(integral to plasma membrane)|GO:0005902(microvillus)|GO:0005929(cilium)|GO:0009986(cell surface)|GO:0015485(cholesterol binding)|GO:0016323(basolateral plasma membrane)|GO:0016324(apical plasma membrane)|GO:0031346(positive regulation of cell projection organization)|GO:0031410(cytoplasmic vesicle)|GO:0031528(microvillus membra…	"Homo sapiens prominin 2 (PROM2), transcript variant 1, mRNA [NM_001165978]"	chr2:95956996-95957055	hs|2q11.1	GGGGAAGTAGCACCCTTGCATTTCAAAAATAAAATTGATGGCATTACAAATGGAATAGAA
A_23_P102611	3.21861	3.21861	1.68644	up	1160.2	2396.89	-0.852732	0.833704	Detected	Detected	0	NM_003881	NM_003881	NM_003881	Hs.592145	8839	WISP2	WNT1 inducible signaling pathway protein 2	ENST00000372868	THC2486325	GO:0001558(regulation of cell growth)|GO:0005178(integrin binding)|GO:0005520(insulin-like growth factor binding)|GO:0005578(proteinaceous extracellular matrix)|GO:0005615(extracellular space)|GO:0005886(plasma membrane)|GO:0007155(cell adhesion)|GO:0007165(signal transduction)|GO:0007267(cell-cell signaling)|GO:0008201(heparin binding)|GO:0060548(negative regulation of cell death)|GO:0070062(ext…	"Homo sapiens WNT1 inducible signaling pathway protein 2 (WISP2), mRNA [NM_003881]"	chr20:43356347-43356406	hs|20q13.12	CATTTTTCTGGGGGTAGGATGAAGAGAAGGCACACAGAGATTCTGGATCTCCTGCTGCCT
A_23_P97112	7.45728	7.45728	2.89865	up	23.6717	113.307	-6.4678	-3.56915	Not Detected	Detected	0	NM_000450	NM_000450	NM_000450	Hs.82848	6401	SELE	selectin E	ENST00000333360	THC2470435	GO:0002092(positive regulation of receptor internalization)|GO:0002523(leukocyte migration involved in inflammatory response)|GO:0002687(positive regulation of leukocyte migration)|GO:0004888(transmembrane signaling receptor activity)|GO:0005515(protein binding)|GO:0005615(extracellular space)|GO:0005886(plasma membrane)|GO:0005901(caveola)|GO:0005905(coated pit)|GO:0006954(inflammatory response)…	"Homo sapiens selectin E (SELE), mRNA [NM_000450]"	chr1:169692108-169692049	hs|1q24.2	GATGTGATAAGGATCAGAACAGCAGAGGTTCTTTTAAAGGGGCAGAAAAACTCTGGGAAA
A_33_P3229122	5.67022	5.67022	2.50341	up	23.8961	86.9711	-6.45418	-3.95078	Not Detected	Detected	0	NM_003522	NM_003522	NM_003522	Hs.182137	8343	HIST1H2BF	"histone cluster 1, H2bf"		THC2500887	GO:0000786(nucleosome)|GO:0002227(innate immune response in mucosa)|GO:0003677(DNA binding)|GO:0005615(extracellular space)|GO:0005634(nucleus)|GO:0005654(nucleoplasm)|GO:0006325(chromatin organization)|GO:0006334(nucleosome assembly)|GO:0019731(antibacterial humoral response)|GO:0046982(protein heterodimerization activity)|GO:0050830(defense response to Gram-positive bacterium)|GO:0070062(extrac…	"Homo sapiens histone cluster 1, H2bf (HIST1H2BF), mRNA [NM_003522]"	chr6:26200153-26200212	hs|6p22.2	ACCAGCTCTAAGTAATTCTAACGTCTTCATACCCAATCCCAAAGGCTCTTTTAAGAGCCA
A_23_P359540	3.30162	3.30162	1.72317	up	4809.31	10191.9	1.19873	2.9219	Detected	Detected	0	NM_003540	NM_003540	NM_003540	Hs.247816	8361	HIST1H4F	"histone cluster 1, H4f"	ENST00000244537	THC2483995	"GO:0000183(chromatin silencing at rDNA)|GO:0000228(nuclear chromosome)|GO:0000278(mitotic cell cycle)|GO:0000723(telomere maintenance)|GO:0000786(nucleosome)|GO:0003677(DNA binding)|GO:0005515(protein binding)|GO:0005576(extracellular region)|GO:0005634(nucleus)|GO:0005654(nucleoplasm)|GO:0006325(chromatin organization)|GO:0006334(nucleosome assembly)|GO:0006335(DNA replication-dependent nucleos…	"Homo sapiens histone cluster 1, H4f (HIST1H4F), mRNA [NM_003540]"	chr6:26240818-26240877	hs|6p22.2	CCGCGGTGTTCTTAAGGTGTTCCTGGAGAATGTGATACGGGACGCCGTAACCTACACGGA
A_33_P3418541	2.84367	2.84367	1.50775	up	101.459	185.19	-4.36813	-2.86038	Detected	Detected	0	AK310215		AK310215	Hs.516105	72	ACTG2	"actin, gamma 2, smooth muscle, enteric"		THC2534924	GO:0005524(ATP binding)|GO:0005615(extracellular space)|GO:0005829(cytosol)|GO:0005856(cytoskeleton)|GO:0006936(muscle contraction)|GO:0070062(extracellular vesicular exosome)|GO:0071944(cell periphery)|GO:0072562(blood microparticle)	"Homo sapiens cDNA, FLJ17257. [AK310215]"	chr2:74130241-74130300	hs|2p13.1	GAGCGGGATTTTTAAATGGTGGAGCTCATGGTAAACAAAATTATGTGTGCAAAATGTTAA
A_21_P0014574	3.2621	3.2621	1.7058	up	40.1097	83.9836	-5.70701	-4.00121	Not Detected	Detected	0	NM_173600	NM_173600	NM_173600	Hs.632712	283463	MUC19	"mucin 19, oligomeric"		THC2768053	GO:0005796(Golgi lumen)|GO:0006493(protein O-linked glycosylation)|GO:0016266(O-glycan processing)|GO:0043687(post-translational protein modification)|GO:0044267(cellular protein metabolic process)|GO:0070062(extracellular vesicular exosome)	"Homo sapiens mucin 19, oligomeric (MUC19), mRNA [NM_173600]"	chr12:40932596-40933336	hs|12q12	AGACTACAACTTCCCTAGGTGGAACTGGCACCACTAGAACTGAAATAAAATCAGGAGCCA
A_32_P7015	2.8509	2.8509	1.51142	up	1074.15	1965.59	-0.963913	0.547506	Detected	Detected	0	NM_012339	NM_012339	NM_012339	Hs.499941	23555	TSPAN15	tetraspanin 15	ENST00000373290	THC2462526	GO:0005886(plasma membrane)|GO:0008593(regulation of Notch signaling pathway)|GO:0009986(cell surface)|GO:0016021(integral to membrane)|GO:0019899(enzyme binding)|GO:0051604(protein maturation)|GO:0070062(extracellular vesicular exosome)|GO:0090002(establishment of protein localization in plasma membrane)|GO:0097197(tetraspanin-enriched microdomain)	"Homo sapiens tetraspanin 15 (TSPAN15), mRNA [NM_012339]"	chr10:71267050-71267109	hs|10q22.1	ATCTCTGGCAGTGCCTTGGCGGTGGTATTCAAGGCAGTTTTGTAGCACCTGTAATTGGGG
A_23_P379475	4.10941	4.10941	2.03893	up	1074.56	2834.38	-0.963354	1.07558	Detected	Detected	0	NM_014762	NM_014762	NM_014762	Hs.498727	1718	DHCR24	24-dehydrocholesterol reductase	ENST00000535035	THC2497269	"GO:0000139(Golgi membrane)|GO:0000246(delta24(24-1) sterol reductase activity)|GO:0005634(nucleus)|GO:0005783(endoplasmic reticulum)|GO:0005789(endoplasmic reticulum membrane)|GO:0005829(cytosol)|GO:0005856(cytoskeleton)|GO:0006695(cholesterol biosynthetic process)|GO:0006915(apoptotic process)|GO:0006979(response to oxidative stress)|GO:0007050(cell cycle arrest)|GO:0007265(Ras protein signal t…	"Homo sapiens 24-dehydrocholesterol reductase (DHCR24), mRNA [NM_014762]"	chr1:55315569-55315510	hs|1p32.3	TTTTCTTTAGAATCAGAATTGTAGCCAGTTTCTTTGGCCAGAAGGATGAATACTTGGATA
A_33_P3253394	18.5298	18.5298	4.21178	up	13.8471	164.693	-7.24138	-3.0296	Not Detected	Detected	0	NM_002287	NM_002287	NM_002287	Hs.572535	3903	LAIR1	leukocyte-associated immunoglobulin-like receptor 1	ENST00000611304	THC2464296	GO:0002376(immune system process)|GO:0005515(protein binding)|GO:0005886(plasma membrane)|GO:0016021(integral to membrane)|GO:0070062(extracellular vesicular exosome)	"Homo sapiens leukocyte-associated immunoglobulin-like receptor 1 (LAIR1), transcript variant a, mRNA [NM_002287]"	chr19:54865294-54865235	hs|19q13.42	GGGGCAGTTGCTAATTTAGTTCTAGGCAAACGTGGACACATTAAATTCTCCTACAAACCC
A_23_P210763	3.42311	3.42311	1.77531	up	2427.8	5334.33	0.212544	1.98785	Detected	Detected	0	NM_000214	NM_000214	NM_000214	Hs.626544	182	JAG1	jagged 1	ENST00000254958	THC2468282	GO:0001525(angiogenesis)|GO:0001709(cell fate determination)|GO:0001974(blood vessel remodeling)|GO:0002011(morphogenesis of an epithelial sheet)|GO:0002456(T cell mediated immunity)|GO:0003184(pulmonary valve morphogenesis)|GO:0003215(cardiac right ventricle morphogenesis)|GO:0005112(Notch binding)|GO:0005198(structural molecule activity)|GO:0005509(calcium ion binding)|GO:0005515(protein bindin…	"Homo sapiens jagged 1 (JAG1), mRNA [NM_000214]"	chr20:10619120-10619061	hs|20p12.2	AGTAAGGGAACAAGTTGAGCTATGACTTAACATAGCCAAAATGTGAGTGGTTGAATATGA
A_21_P0000110	7.18576	7.18576	2.84514	up	25.3919	117.116	-6.36659	-3.52145	Not Detected	Detected	0	NM_001190708	NM_001190708	NM_001190708	Hs.722730	100463488	MTRNR2L10	MT-RNR2-like 10	ENST00000545075		GO:0005576(extracellular region)|GO:0005737(cytoplasm)	"Homo sapiens MT-RNR2-like 10 (MTRNR2L10), mRNA [NM_001190708]"	chrX:55207883-55207824	hs|Xp11.21	TGATGCTATCTCAATCTAACAAATCATCACATACCCTACCCAAGAACAGGGTTTGTTAAG
A_33_P3220390	3.69538	3.69538	1.88572	up	1928.06	4573.28	-0.119952	1.76577	Detected	Detected	0	BC028180		BC028180	Hs.446091	9589	WTAP	Wilms tumor 1 associated protein		THC2502622	"GO:0000381(regulation of alternative nuclear mRNA splicing, via spliceosome)|GO:0005634(nucleus)|GO:0005654(nucleoplasm)|GO:0005730(nucleolus)|GO:0006397(mRNA processing)|GO:0007049(cell cycle)|GO:0008380(RNA splicing)|GO:0016607(nuclear speck)|GO:0031965(nuclear membrane)|GO:0080009(mRNA methylation)"	"Homo sapiens Wilms tumor 1 associated protein, mRNA (cDNA clone IMAGE:5399821), partial cds. [BC028180]"	chr6:160149383-160149442	hs|6q25.3	GTTGTTTGATCCCAAAGGATTAGCTTAACATTATCAAGGACTAGCATAACTGTGATTATG
A_23_P20022	3.1045	3.1045	1.63436	up	41679.8	83054.8	4.31417	5.94854	Detected	Detected	0	NM_013332	NM_013332	NM_013332	Hs.706124	29923	HILPDA	hypoxia inducible lipid droplet-associated	ENST00000466473	THC2461902	GO:0001819(positive regulation of cytokine production)|GO:0005102(receptor binding)|GO:0005515(protein binding)|GO:0005615(extracellular space)|GO:0005811(lipid particle)|GO:0006950(response to stress)|GO:0008284(positive regulation of cell proliferation)|GO:0009986(cell surface)|GO:0010884(positive regulation of lipid storage)|GO:0016021(integral to membrane)|GO:0030141(secretory granule)|GO:003…	"Homo sapiens hypoxia inducible lipid droplet-associated (HILPDA), transcript variant 1, mRNA [NM_013332]"	chr7:128098381-128098440	hs|7q32.1	GGATGCCAAAGCCTGCTCAAGTTATGGACATTGTGGCCACCATGTGGCTTAAATGATTTT
A_33_P3246505	3.26642	3.26642	1.70771	up	9766.97	20477.6	2.22081	3.92852	Detected	Detected	0	ENST00000375322		AB209539		1326	MAP3K8	mitogen-activated protein kinase kinase kinase 8	ENST00000375322	THC2500322	GO:0000165(MAPK cascade)|GO:0000186(activation of MAPKK activity)|GO:0000287(magnesium ion binding)|GO:0004674(protein serine/threonine kinase activity)|GO:0004702(receptor signaling protein serine/threonine kinase activity)|GO:0004709(MAP kinase kinase kinase activity)|GO:0005515(protein binding)|GO:0005524(ATP binding)|GO:0005737(cytoplasm)|GO:0005829(cytosol)|GO:0006468(protein phosphorylation…	mitogen-activated protein kinase kinase kinase 8 [Source:HGNC Symbol;Acc:HGNC:6860] [ENST00000375322]	chr10:30728298-30728357	hs|10p11.23	GGCTGGCAGGCATGATTTTAAAAAATGTAATCATCAGTAAGAAGTACTTCCATGTTAAAG
A_23_P55586	6.57259	6.57259	2.71646	up	19.6853	83.0477	-6.73384	-4.01737	Not Detected	Detected	0	NM_031891	NM_031891	NM_031891	Hs.671510	28316	CDH20	"cadherin 20, type 2"	ENST00000536675	THC2486781	GO:0005509(calcium ion binding)|GO:0005886(plasma membrane)|GO:0007156(homophilic cell adhesion)|GO:0016021(integral to membrane)	"Homo sapiens cadherin 20, type 2 (CDH20), mRNA [NM_031891]"	chr18:59222285-59222344	hs|18q21.33	TACAGAGATGCCAATTGAAAGCAGAAAGTTCTACTCTCGTATCTGTTTTTTATCTTATCT
A_24_P282416	3.23843	3.23843	1.69529	up	173.08	359.772	-3.59759	-1.9023	Detected	Detected	0	NM_007313	NM_007313	NM_007313	Hs.431048	25	ABL1	"ABL proto-oncogene 1, non-receptor tyrosine kinase"	ENST00000372348	THC2632391	"GO:0000287(magnesium ion binding)|GO:0001922(B-1 B cell homeostasis)|GO:0002322(B cell proliferation involved in immune response)|GO:0002333(transitional one stage B cell differentiation)|GO:0003677(DNA binding)|GO:0003785(actin monomer binding)|GO:0004515(nicotinate-nucleotide adenylyltransferase activity)|GO:0004672(protein kinase activity)|GO:0004713(protein tyrosine kinase activity)|GO:00047…	"Homo sapiens ABL proto-oncogene 1, non-receptor tyrosine kinase (ABL1), transcript variant b, mRNA [NM_007313]"	chr9:133589580-133589639	hs|9q34.12	TCAATTGCTGACTTGTGGAGATGCAGCGAATGTGAAATCCCACGTATATGCCATTTCCCT
A_33_P3386775	4.08599	4.08599	2.03068	up	678.208	1778.72	-1.6273	0.403381	Detected	Detected	0	NM_002390	NM_002390	NM_002390	Hs.6088	4185	ADAM11	ADAM metallopeptidase domain 11	ENST00000355638	THC2477011	GO:0004222(metalloendopeptidase activity)|GO:0005178(integrin binding)|GO:0005886(plasma membrane)|GO:0006508(proteolysis)|GO:0007229(integrin-mediated signaling pathway)|GO:0008237(metallopeptidase activity)|GO:0008270(zinc ion binding)|GO:0016021(integral to membrane)|GO:0031012(extracellular matrix)	"Homo sapiens ADAM metallopeptidase domain 11 (ADAM11), mRNA [NM_002390]"	chr17:42857869-42857928	hs|17q21.31	AATTCGAAAACAACCGTCCTGCTGTCCCTGTCAGGACACATGGATTTTGGCAGGGCGGGG
A_32_P108254	3.17315	3.17315	1.66592	up	135.48	275.938	-3.95096	-2.28504	Detected	Detected	0	NM_017565	NM_017565	NM_017565	Hs.268874	54757	FAM20A	"family with sequence similarity 20, member A"	ENST00000375556	THC2476784	GO:0005623(cell)|GO:0005794(Golgi apparatus)|GO:0055074(calcium ion homeostasis)|GO:0070062(extracellular vesicular exosome)|GO:0070166(enamel mineralization)	"Homo sapiens family with sequence similarity 20, member A (FAM20A), transcript variant 1, mRNA [NM_017565]"	chr17:66533427-66533368	hs|17q24.2	TCGTGCGTTGCCTTGCTCCGTTTTTCCCAAAAAGCACTGGCTTCATCAAGGCCACCGACG
A_23_P30813	4.27579	4.27579	2.09619	up	4628.24	12702.2	1.14336	3.23955	Detected	Detected	0	NM_003541	NM_003541	NM_003541	Hs.528055	8362	HIST1H4K	"histone cluster 1, H4k"		THC2620030	"GO:0000183(chromatin silencing at rDNA)|GO:0000228(nuclear chromosome)|GO:0000278(mitotic cell cycle)|GO:0000723(telomere maintenance)|GO:0000786(nucleosome)|GO:0003677(DNA binding)|GO:0005515(protein binding)|GO:0005576(extracellular region)|GO:0005634(nucleus)|GO:0005654(nucleoplasm)|GO:0006325(chromatin organization)|GO:0006334(nucleosome assembly)|GO:0006335(DNA replication-dependent nucleos…	"Homo sapiens histone cluster 1, H4k (HIST1H4K), mRNA [NM_003541]"	chr6:27799013-27798954	hs|6p22.1	TCTACGGTTTCGGTGGTTGAGCGTCCCTTTCTATCAACAAAAGGCCCTTTTTAGGGCCCC
A_33_P3229241	4.12926	4.12926	2.04588	up	645.179	1710.02	-1.69933	0.346553	Detected	Detected	0	ENST00000369167		BC110793	Hs.632451	440689	HIST2H2BF	"histone cluster 2, H2bf"	ENST00000369167	THC2484633	GO:0000786(nucleosome)|GO:0003674(molecular_function)|GO:0003677(DNA binding)|GO:0005634(nucleus)|GO:0005654(nucleoplasm)|GO:0006325(chromatin organization)|GO:0046982(protein heterodimerization activity)|GO:0070062(extracellular vesicular exosome)	"histone cluster 2, H2bf [Source:HGNC Symbol;Acc:HGNC:24700] [ENST00000369167]"	chr1:149397179-149397120	hs|1q21.2	ATCCTGACAAAAGCCAGTGGATGTTTCTTTTGCCAAATAAAATATACCCTTGGTGCAACT
A_24_P229531	2.6773	2.6773	1.42078	up	467.76	803.837	-2.16326	-0.742482	Detected	Detected	0	NM_001031716	NM_001031716	NM_001031716	Hs.591610	64859	NABP1	nucleic acid binding protein 1	ENST00000409510	THC2629377	GO:0000724(double-strand break repair via homologous recombination)|GO:0003697(single-stranded DNA binding)|GO:0003723(RNA binding)|GO:0005634(nucleus)|GO:0005654(nucleoplasm)|GO:0005737(cytoplasm)|GO:0006281(DNA repair)|GO:0006974(response to DNA damage stimulus)|GO:0007093(mitotic cell cycle checkpoint)|GO:0010212(response to ionizing radiation)|GO:0070876(SOSS complex)	"Homo sapiens nucleic acid binding protein 1 (NABP1), transcript variant 1, mRNA [NM_001031716]"	chr2:192543838-192546714	hs|2q32.3	ATTCGGTTGACCAGAGGGTATGCATCCATGTGGAAAGGATGTCTGACACTTTATACTGGA
A_23_P83098	2.86223	2.86223	1.51714	up	1923.65	3534.1	-0.123256	1.39388	Detected	Detected	0	NM_000689	NM_000689	NM_000689	Hs.76392	216	ALDH1A1	"aldehyde dehydrogenase 1 family, member A1"	ENST00000297785	THC2507100	GO:0001758(retinal dehydrogenase activity)|GO:0004028(3-chloroallyl aldehyde dehydrogenase activity)|GO:0004029(aldehyde dehydrogenase (NAD) activity)|GO:0005099(Ras GTPase activator activity)|GO:0005497(androgen binding)|GO:0005737(cytoplasm)|GO:0005829(cytosol)|GO:0006069(ethanol oxidation)|GO:0006081(cellular aldehyde metabolic process)|GO:0006805(xenobiotic metabolic process)|GO:0018479(benza…	"Homo sapiens aldehyde dehydrogenase 1 family, member A1 (ALDH1A1), mRNA [NM_000689]"	chr9:75516195-75516136	hs|9q21.13	GGAGAGTACGGTTTCCATGAATATACAGAGGTCAAAACAGTCACAGTGAAAATCTCTCAG
A_21_P0011055	9.36526	9.36526	3.22732	up	12.1514	73.0457	-7.42983	-4.20251	Not Detected	Detected	0	NM_173591	NM_173591		Hs.723594	283310	OTOGL	otogelin-like	ENST00000458043	THC2628892	GO:0005576(extracellular region)|GO:0007605(sensory perception of sound)|GO:0046373(L-arabinose metabolic process)|GO:0046556(alpha-N-arabinofuranosidase activity)	"Homo sapiens otogelin-like (OTOGL), mRNA [NM_173591]"	chr12:80655861-80658827	hs|12q21.31	AATCAACAAAACATTGGGTATGCAGCACACTGTGATGTCATCCACCAGGAGCTCTTTGCT
A_33_P3214690	9.80054	9.80054	3.29286	up	63.6117	400.161	-5.04167	-1.74881	Detected	Detected	0	NM_014932	NM_014932	NM_014932	Hs.478289	22871	NLGN1	neuroligin 1	ENST00000401917	THC2473172	"GO:0002087(regulation of respiratory gaseous exchange by neurological system process)|GO:0004872(receptor activity)|GO:0005615(extracellular space)|GO:0005887(integral to plasma membrane)|GO:0006605(protein targeting)|GO:0007157(heterophilic cell-cell adhesion)|GO:0007158(neuron cell-cell adhesion)|GO:0007399(nervous system development)|GO:0007416(synapse assembly)|GO:0008152(metabolic process)|…	"Homo sapiens neuroligin 1 (NLGN1), mRNA [NM_014932]"	chr3:173998992-173999051	hs|3q26.31	ATTCAGCCCTTACACACATTCAATACATTTACTGGAGGACAGAACAATACTCTGCCCCAT
A_33_P3359047	2.86739	2.86739	1.51974	up	1038.29	1910.97	-1.01289	0.506847	Detected	Detected	0	NM_001195685	NM_001195685	NM_001195685	Hs.21929	130574	LYPD6	LY6/PLAUR domain containing 6	ENST00000392854	THC2480895	GO:0005576(extracellular region)	"Homo sapiens LY6/PLAUR domain containing 6 (LYPD6), transcript variant 1, mRNA [NM_001195685]"	chr2:150327475-150327534	hs|2q23.2	TGGAGGTCATCACAGCCAAGCATTGCCACTTACCATGAGGAATAAATGTTGCTTCATTGT
A_23_P30805	3.08928	3.08928	1.62727	up	4596.42	9114.31	1.13341	2.76068	Detected	Detected	0	NM_021968	NM_021968	NM_021968	Hs.278483	8363	HIST1H4J	"histone cluster 1, H4j"	ENST00000355057	THC2476532	"GO:0000183(chromatin silencing at rDNA)|GO:0000228(nuclear chromosome)|GO:0000278(mitotic cell cycle)|GO:0000723(telomere maintenance)|GO:0000786(nucleosome)|GO:0003677(DNA binding)|GO:0005515(protein binding)|GO:0005576(extracellular region)|GO:0005634(nucleus)|GO:0005654(nucleoplasm)|GO:0006325(chromatin organization)|GO:0006334(nucleosome assembly)|GO:0006335(DNA replication-dependent nucleos…	"Homo sapiens histone cluster 1, H4j (HIST1H4J), mRNA [NM_021968]"	chr6:27792176-27792235	hs|6p22.1	AAGCGCCAGGGCCGCACCCTCTACGGTTTCGGTGGTTGAGCGTCCCTTTCTATCAATAAA
A_23_P213336	3.21451	3.21451	1.6846	up	1211.46	2499.61	-0.790354	0.894246	Detected	Detected	0	NM_000800	NM_000800	NM_000800	Hs.483635	2246	FGF1	fibroblast growth factor 1 (acidic)	ENST00000441680	THC2662054	GO:0001525(angiogenesis)|GO:0001759(organ induction)|GO:0005104(fibroblast growth factor receptor binding)|GO:0005515(protein binding)|GO:0005576(extracellular region)|GO:0005578(proteinaceous extracellular matrix)|GO:0005615(extracellular space)|GO:0005654(nucleoplasm)|GO:0005730(nucleolus)|GO:0005829(cytosol)|GO:0005938(cell cortex)|GO:0007165(signal transduction)|GO:0007173(epidermal growth fa…	"Homo sapiens fibroblast growth factor 1 (acidic) (FGF1), transcript variant 1, mRNA [NM_000800]"	chr5:141974871-141974812	hs|5q31.3	CAGTCTCTTCTGATTAAAGAGATCTGTTCTGGGTGTTGACCACTCCAGAGAAGTTTCGAG
A_23_P17065	2.86939	2.86939	1.52074	up	21770.1	40095.6	3.37717	4.89792	Detected	Detected	0	NM_004591	NM_004591	NM_004591	Hs.75498	6364	CCL20	chemokine (C-C motif) ligand 20	ENST00000473642	THC2470856	GO:0005515(protein binding)|GO:0005576(extracellular region)|GO:0005615(extracellular space)|GO:0006935(chemotaxis)|GO:0006954(inflammatory response)|GO:0006955(immune response)|GO:0007165(signal transduction)|GO:0007267(cell-cell signaling)|GO:0008009(chemokine activity)|GO:0042060(wound healing)|GO:0042742(defense response to bacterium)|GO:0050726(positive regulation of interleukin-1 alpha bios…	"Homo sapiens chemokine (C-C motif) ligand 20 (CCL20), transcript variant 1, mRNA [NM_004591]"	chr2:228681100-228681836	hs|2q36.3	GTAAAAAAGTCAAGAACATGTAAAAACTGTGGCTTTTCTGGAATGGAATTGGACATAGCC
A_33_P3264667	3.05127	3.05127	1.60941	up	44.1251	86.4199	-5.56936	-3.95995	Not Detected	Detected	0	NM_183374	NM_183374	NM_183374	Hs.369993	340665	CYP26C1	"cytochrome P450, family 26, subfamily C, polypeptide 1"	ENST00000285949	NP1247942	GO:0001972(retinoic acid binding)|GO:0005506(iron ion binding)|GO:0005789(endoplasmic reticulum membrane)|GO:0006766(vitamin metabolic process)|GO:0006805(xenobiotic metabolic process)|GO:0007417(central nervous system development)|GO:0008401(retinoic acid 4-hydroxylase activity)|GO:0009952(anterior/posterior pattern specification)|GO:0014032(neural crest cell development)|GO:0016021(integral to …	"Homo sapiens cytochrome P450, family 26, subfamily C, polypeptide 1 (CYP26C1), mRNA [NM_183374]"	chr10:94824196-94824255	hs|10q23.33	TTCACGAGGACAAGGCTGCAGAGCCGGGTGATGCCCTCGACCTAATCATTCACAGTGCAA
A_33_P3408918	2.86943	2.86943	1.52076	up	2859.67	5266.94	0.448746	1.96951	Detected	Detected	0	NM_030754	NM_030754	NM_030754	Hs.731376	6289	SAA2	serum amyloid A2	ENST00000526900	THC2462771	GO:0006953(acute-phase response)|GO:0034364(high-density lipoprotein particle)|GO:0070062(extracellular vesicular exosome)	"Homo sapiens serum amyloid A2 (SAA2), transcript variant 1, mRNA [NM_030754]"	chr11:18266850-18266791	hs|11p15.1	CTATGTCCAGAGAAGCTGAGATATGGCATATAATAGGCATCTAATAAATGCTTAAGAGGT
A_33_P3504659	2.87086	2.87086	1.52148	up	618.666	1140.03	-1.75987	-0.238387	Detected	Detected	0	NM_032977	NM_032977	NM_032977	Hs.5353	843	CASP10	"caspase 10, apoptosis-related cysteine peptidase"	ENST00000346817	THC2485181	GO:0004197(cysteine-type endopeptidase activity)|GO:0005515(protein binding)|GO:0005737(cytoplasm)|GO:0005829(cytosol)|GO:0005886(plasma membrane)|GO:0006508(proteolysis)|GO:0006915(apoptotic process)|GO:0031265(CD95 death-inducing signaling complex)|GO:0031625(ubiquitin protein ligase binding)|GO:0035877(death effector domain binding)|GO:0042981(regulation of apoptotic process)|GO:0043123(positi…	"Homo sapiens caspase 10, apoptosis-related cysteine peptidase (CASP10), transcript variant 1, mRNA [NM_032977]"	chr2:202084646-202084705	hs|2q33.1	CCTTGGGGCGTGGAAGGGCATTAGGAGTGTTTCATTTGATATGTGAATGCTCATAAAAAA
A_24_P203308	18.5576	18.5576	4.21394	up	14.8115	176.429	-7.14424	-2.9303	Not Detected	Detected	0	NM_182489	NM_182489	NM_182489	Hs.592279	346673	STRA8	stimulated by retinoic acid 8	ENST00000275764	NP827842	GO:0001541(ovarian follicle development)|GO:0005634(nucleus)|GO:0005737(cytoplasm)|GO:0006260(DNA replication)|GO:0007066(female meiosis sister chromatid cohesion)|GO:0007129(synapsis)|GO:0007131(reciprocal meiotic recombination)|GO:0007283(spermatogenesis)|GO:0009566(fertilization)|GO:0010032(meiotic chromosome condensation)|GO:0033315(meiotic cell cycle DNA replication checkpoint)|GO:0042138(me…	"Homo sapiens stimulated by retinoic acid 8 (STRA8), mRNA [NM_182489]"	chr7:134939898-134939957	hs|7q33	CAGAGGAGAAGTTTCAGCTCTATATGCAGATCATCAACTTTTTTAAAGGCCTTAGCTGTG
A_33_P3252083	3.81664	3.81664	1.9323	up	56.2309	137.754	-5.2196	-3.28729	Not Detected	Detected	0	NM_021150	NM_021150	NM_021150	Hs.505946	23426	GRIP1	glutamate receptor interacting protein 1	ENST00000398016	THC2605865	"GO:0003713(transcription coactivator activity)|GO:0005515(protein binding)|GO:0005783(endoplasmic reticulum)|GO:0005829(cytosol)|GO:0005886(plasma membrane)|GO:0007268(synaptic transmission)|GO:0008013(beta-catenin binding)|GO:0008022(protein C-terminus binding)|GO:0008104(protein localization)|GO:0016023(cytoplasmic membrane-bounded vesicle)|GO:0016358(dendrite development)|GO:0030054(cell junc…	"Homo sapiens glutamate receptor interacting protein 1 (GRIP1), transcript variant 1, mRNA [NM_021150]"	chr12:66742859-66742800	hs|12q14.3	TTTCCAGCAGCCTAGCCACGGTGGTAATTTGGAGACACGAGAACCCACTAATACATTATA
A_24_P89457	3.1784	3.1784	1.6683	up	3522.29	7185.91	0.749411	2.41771	Detected	Detected	0	NM_078467	NM_078467	NM_078467	Hs.370771	1026	CDKN1A	"cyclin-dependent kinase inhibitor 1A (p21, Cip1)"	ENST00000478800	NP526406	"GO:0000079(regulation of cyclin-dependent protein kinase activity)|GO:0000082(G1/S transition of mitotic cell cycle)|GO:0000086(G2/M transition of mitotic cell cycle)|GO:0000278(mitotic cell cycle)|GO:0000307(cyclin-dependent protein kinase holoenzyme complex)|GO:0004861(cyclin-dependent protein kinase inhibitor activity)|GO:0005515(protein binding)|GO:0005634(nucleus)|GO:0005654(nucleoplasm)|GO…	"Homo sapiens cyclin-dependent kinase inhibitor 1A (p21, Cip1) (CDKN1A), transcript variant 2, mRNA [NM_078467]"	chr6:36652178-36652237	hs|6p21.2	TCTGCTGCAGGGGACAGCAGAGGAAGACCATGTGGACCTGTCACTGTCTTGTACCCTTGT
A_23_P309396	3.54461	3.54461	1.82563	up	39.6186	90.1395	-5.72478	-3.89915	Not Detected	Detected	0	NM_178857	NM_178857	NM_178857	Hs.33538	94137	RP1L1	retinitis pigmentosa 1-like 1	ENST00000382483	NP1213501	GO:0001750(photoreceptor outer segment)|GO:0005874(microtubule)|GO:0005930(axoneme)|GO:0007601(visual perception)|GO:0030030(cell projection organization)|GO:0032391(photoreceptor connecting cilium)|GO:0035556(intracellular signal transduction)|GO:0042461(photoreceptor cell development)|GO:0045494(photoreceptor cell maintenance)|GO:0070062(extracellular vesicular exosome)	"Homo sapiens retinitis pigmentosa 1-like 1 (RP1L1), mRNA [NM_178857]"	chr8:10464670-10464611	hs|8p23.1	ACTCAGAAAATGACCATGTACTTGGAGACACAAGGAGCCCTGATGCCAAGTCCACGGGGA
A_33_P3250443	4.10882	4.10882	2.03872	up	59.4129	156.691	-5.14018	-3.10146	Not Detected	Detected	0	NM_207581	NM_207581	NM_207581	Hs.497987	405753	DUOXA2	dual oxidase maturation factor 2	ENST00000491993	THC2641623	GO:0005789(endoplasmic reticulum membrane)|GO:0015031(protein transport)|GO:0016021(integral to membrane)|GO:0042743(hydrogen peroxide metabolic process)|GO:0050727(regulation of inflammatory response)|GO:2000609(regulation of thyroid hormone generation)	"Homo sapiens dual oxidase maturation factor 2 (DUOXA2), mRNA [NM_207581]"	chr15:45410227-45410286	hs|15q21.1	TCGGACATCCGCAGGCACCAGGGAAAGTCTCCTGGGGCGATCTGTAAATAAACCTTTTTT
A_23_P76218	3.05624	3.05624	1.61176	up	204.805	401.767	-3.35478	-1.74303	Detected	Detected	0	NM_053283	NM_053283	NM_053283	Hs.350570	117159	DCD	dermcidin	ENST00000546807	THC2475814	GO:0005576(extracellular region)|GO:0006508(proteolysis)|GO:0008233(peptidase activity)|GO:0031640(killing of cells of other organism)|GO:0042742(defense response to bacterium)|GO:0050832(defense response to fungus)|GO:0070062(extracellular vesicular exosome)	"Homo sapiens dermcidin (DCD), transcript variant 1, mRNA [NM_053283]"	chr12:55038504-55038445	hs|12q13.2	TACTATAGCTGTAAGGAGAAGCTGAGAAATGATACCCAGGAGCAGCAGGCTTTACGTCTT
A_24_P8371	3.25025	3.25025	1.70055	up	4455.95	9296.18	1.08863	2.78918	Detected	Detected	0	NM_001124758	NM_001124758	NM_001124758	Hs.22824	124976	SPNS2	spinster homolog 2 (Drosophila)	ENST00000329078	THC2465062	GO:0001782(B cell homeostasis)|GO:0002920(regulation of humoral immune response)|GO:0003376(sphingosine-1-phosphate signaling pathway)|GO:0005765(lysosomal membrane)|GO:0006665(sphingolipid metabolic process)|GO:0006869(lipid transport)|GO:0016021(integral to membrane)|GO:0031982(vesicle)|GO:0040011(locomotion)|GO:0043029(T cell homeostasis)|GO:0046624(sphingolipid transporter activity)|GO:004807…	"Homo sapiens spinster homolog 2 (Drosophila) (SPNS2), mRNA [NM_001124758]"	chr17:4442247-4442306	hs|17p13.2	GCTGCTGATTGTGAATCTCAGAGTCTTAAGAGAGAAGCCAAATATATTCCTCTTGTAAAT
A_33_P3404989	6.34246	6.34246	2.66504	up	286.786	1167.52	-2.86906	-0.204012	Detected	Detected	0	NM_003536	NM_003536	NM_003536	Hs.591778	8357	HIST1H3H	"histone cluster 1, H3h"	ENST00000369163	THC2513394	"GO:0000183(chromatin silencing at rDNA)|GO:0000228(nuclear chromosome)|GO:0000786(nucleosome)|GO:0003677(DNA binding)|GO:0005515(protein binding)|GO:0005576(extracellular region)|GO:0005634(nucleus)|GO:0005654(nucleoplasm)|GO:0006325(chromatin organization)|GO:0006335(DNA replication-dependent nucleosome assembly)|GO:0007596(blood coagulation)|GO:0010467(gene expression)|GO:0016020(membrane)|GO:…	"Homo sapiens histone cluster 1, H3h (HIST1H3H), mRNA [NM_003536]"	chr6:27778255-27778314	hs|6p22.1	GGGCTTGAGTCTCAAGGACTCACTGATTACATACCCAAAGGCTCTTTTCAGAGCCACCCA
A_21_P0000197	11.932	11.932	3.57676	up	94.1709	721.235	-4.47568	-0.898915	Detected	Detected	0	NM_021064	NM_021064	NM_021064	Hs.51011	8969	HIST1H2AG	"histone cluster 1, H2ag"	ENST00000359193	THC2477745	GO:0000786(nucleosome)|GO:0003677(DNA binding)|GO:0005515(protein binding)|GO:0005634(nucleus)|GO:0008150(biological_process)|GO:0019899(enzyme binding)|GO:0046982(protein heterodimerization activity)|GO:0070062(extracellular vesicular exosome)	"Homo sapiens histone cluster 1, H2ag (HIST1H2AG), mRNA [NM_021064]"	chr6:27101247-27101306	hs|6p22.1	TCTGTACTAGTTTGTGGCAGCTCAAGTAAAATCGAGTCCAAACCAACGGCTCTTTTCAGG
A_33_P3349395	2.87841	2.87841	1.52527	up	154.023	284.567	-3.76589	-2.24061	Detected	Detected	0	XM_006724079	XM_006724079	XM_006724079	Hs.658723	27443	CECR2	"cat eye syndrome chromosome region, candidate 2"		THC2686850	GO:0000910(cytokinesis)|GO:0001842(neural fold formation)|GO:0001843(neural tube closure)|GO:0005515(protein binding)|GO:0005634(nucleus)|GO:0005719(nuclear euchromatin)|GO:0006309(apoptotic DNA fragmentation)|GO:0007010(cytoskeleton organization)|GO:0007338(single fertilization)|GO:0016192(vesicle-mediated transport)|GO:0043044(ATP-dependent chromatin remodeling)|GO:0060122(inner ear receptor st…	"PREDICTED: Homo sapiens cat eye syndrome chromosome region, candidate 2 (CECR2), transcript variant X3, mRNA [XM_006724079]"	chr22:18019144-18019203	hs|22q11.21	TCTGCAATATCAAAGTAGAAATGGCTCTTTCTGAACATCACACTCCGGGGCCTGTTGTGA
A_33_P3327921	2.87901	2.87901	1.52558	up	406.023	750.312	-2.36747	-0.841895	Detected	Detected	0	NM_012249	NM_012249	NM_012249	Hs.709193	23433	RHOQ	ras homolog family member Q		THC2510562	GO:0003924(GTPase activity)|GO:0005522(profilin binding)|GO:0005525(GTP binding)|GO:0005829(cytosol)|GO:0005884(actin filament)|GO:0005886(plasma membrane)|GO:0006184(GTP catabolic process)|GO:0007264(small GTPase mediated signal transduction)|GO:0008286(insulin receptor signaling pathway)|GO:0008360(regulation of cell shape)|GO:0030866(cortical actin cytoskeleton organization)|GO:0032427(GBD dom…	"Homo sapiens ras homolog family member Q (RHOQ), mRNA [NM_012249]"	chr2:46811768-46811827	hs|2p21	AAATCAAGAAGTGCATGCCATCAGCAAATTAAAATGTGGACTGGCTTTGAAGACTGTTAA
A_23_P10385	3.06501	3.06501	1.61589	up	1387.37	2729.42	-0.594755	1.02114	Detected	Detected	0	NM_016448	NM_016448	NM_016448	Hs.656473	51514	DTL	denticleless E3 ubiquitin protein ligase homolog (Drosophila)	ENST00000475419	THC2461080	GO:0000209(protein polyubiquitination)|GO:0004842(ubiquitin-protein ligase activity)|GO:0005515(protein binding)|GO:0005634(nucleus)|GO:0005654(nucleoplasm)|GO:0005694(chromosome)|GO:0005730(nucleolus)|GO:0005737(cytoplasm)|GO:0005813(centrosome)|GO:0006260(DNA replication)|GO:0006511(ubiquitin-dependent protein catabolic process)|GO:0006513(protein monoubiquitination)|GO:0006974(response to DNA …	"Homo sapiens denticleless E3 ubiquitin protein ligase homolog (Drosophila) (DTL), transcript variant 1, mRNA [NM_016448]"	chr1:212277852-212277911	hs|1q32.3	GGAAGATGTTATTTATGACCAATATCTGCCAGTAACGCTGTTTATCTCACTTGCTTTGAA
A_33_P3367251	3.59378	3.59378	1.8455	up	53.4551	123.307	-5.29263	-3.44713	Not Detected	Detected	0	NM_001114395	NM_001114395	NM_001114395	Hs.435381	54875	CNTLN	"centlein, centrosomal protein"	ENST00000380641	THC2650521	"GO:0000155(two-component sensor activity)|GO:0000160(two-component signal transduction system (phosphorelay))|GO:0005737(cytoplasm)|GO:0005814(centriole)|GO:0010457(centriole-centriole cohesion)|GO:0016020(membrane)|GO:0019901(protein kinase binding)|GO:0019904(protein domain specific binding)|GO:0023014(signal transduction by phosphorylation)|GO:0030674(protein binding, bridging)|GO:0033365(pro…	"Homo sapiens centlein, centrosomal protein (CNTLN), transcript variant 2, mRNA [NM_001114395]"	chr9:17301768-17301827	hs|9p22.2	GGTGGCTGTATGTAGTTATTTTAAAAAACAAAGTCTTTTATAATTCCATCTCCCAGAGGC
A_23_P111132	5.90588	5.90588	2.56215	up	4410.84	16720.6	1.07395	3.6361	Detected	Detected	0	NM_005345	NM_005345	NM_005345	Hs.274402	3303	HSPA1A	heat shock 70kDa protein 1A	ENST00000375651	THC2597004	"GO:0000151(ubiquitin ligase complex)|GO:0001618(viral receptor activity)|GO:0001664(G-protein coupled receptor binding)|GO:0003725(double-stranded RNA binding)|GO:0005515(protein binding)|GO:0005524(ATP binding)|GO:0005634(nucleus)|GO:0005654(nucleoplasm)|GO:0005737(cytoplasm)|GO:0005739(mitochondrion)|GO:0005783(endoplasmic reticulum)|GO:0005814(centriole)|GO:0005829(cytosol)|GO:0005925(focal a…	"Homo sapiens heat shock 70kDa protein 1A (HSPA1A), mRNA [NM_005345]"	chr6:31785491-31785550	hs|6p21.33	GAGCTTCAAGACTTTGCATTTCCTAGTATTTCTGTTTGTCAGTTCTCAATTTCCTGTGTT
A_23_P67355	3.25571	3.25571	1.70297	up	35.3071	73.7828	-5.891	-4.18803	Not Detected	Detected	0	NM_000951	NM_000951	NM_000951	Hs.35101	5639	PRRG2	proline rich Gla (G-carboxyglutamic acid) 2	ENST00000596700	THC2474207	GO:0005509(calcium ion binding)|GO:0005515(protein binding)|GO:0005576(extracellular region)|GO:0005887(integral to plasma membrane)	"Homo sapiens proline rich Gla (G-carboxyglutamic acid) 2 (PRRG2), mRNA [NM_000951]"	chr19:50093697-50093756	hs|19q13.33	GGATTCCGGAAGCCGCTAGGCCTCATAGACGCCGAAGCTGGACTTGGAGTGGGGAATGGT
A_33_P3351851	3.35622	3.35622	1.74684	up	130.651	281.455	-4.00332	-2.25648	Detected	Detected	0	NM_003546	NM_003546	NM_003546	Hs.533295	8368	HIST1H4L	"histone cluster 1, H4l"	ENST00000618305	THC2486688	"GO:0000183(chromatin silencing at rDNA)|GO:0000228(nuclear chromosome)|GO:0000278(mitotic cell cycle)|GO:0000723(telomere maintenance)|GO:0000786(nucleosome)|GO:0003677(DNA binding)|GO:0005515(protein binding)|GO:0005576(extracellular region)|GO:0005634(nucleus)|GO:0005654(nucleoplasm)|GO:0006325(chromatin organization)|GO:0006334(nucleosome assembly)|GO:0006335(DNA replication-dependent nucleos…	"Homo sapiens histone cluster 1, H4l (HIST1H4L), mRNA [NM_003546]"	chr6:27841113-27841054	hs|6p22.1	TTAAAGTGTTTTTGGAGAATGTAATCCGCGATGCAGTTACCTACACGGAGCACGCCAAAC
A_33_P3329013	3.53723	3.53723	1.82262	up	157.561	357.732	-3.73312	-1.9105	Detected	Detected	0	NM_001050	NM_001050	NM_001050	Hs.514451	6752	SSTR2	somatostatin receptor 2	ENST00000357585	THC2470588	"GO:0004994(somatostatin receptor activity)|GO:0005515(protein binding)|GO:0005737(cytoplasm)|GO:0005886(plasma membrane)|GO:0005887(integral to plasma membrane)|GO:0006937(regulation of muscle contraction)|GO:0007187(G-protein coupled receptor signaling pathway, coupled to cyclic nucleotide second messenger)|GO:0007193(adenylate cyclase-inhibiting G-protein coupled receptor signaling pathway)|GO…	"Homo sapiens somatostatin receptor 2 (SSTR2), mRNA [NM_001050]"	chr17:71166803-71166862	hs|17q25.1	CAAAGTCTGGAGAAGAGGGATCATGCCTGGATATGATCTTTAGAAACAACAAAAATAGAA
A_23_P7835	16.8845	16.8845	4.07763	up	12.5315	135.812	-7.3854	-3.30778	Not Detected	Detected	0	NM_004440	NM_004440	NM_004440	Hs.73962	2045	EPHA7	EPH receptor A7	ENST00000369303	THC2473224	GO:0004713(protein tyrosine kinase activity)|GO:0005004(GPI-linked ephrin receptor activity)|GO:0005515(protein binding)|GO:0005524(ATP binding)|GO:0005886(plasma membrane)|GO:0005887(integral to plasma membrane)|GO:0007411(axon guidance)|GO:0007420(brain development)|GO:0008046(axon guidance receptor activity)|GO:0016310(phosphorylation)|GO:0018108(peptidyl-tyrosine phosphorylation)|GO:0022407(r…	"Homo sapiens EPH receptor A7 (EPHA7), transcript variant 1, mRNA [NM_004440]"	chr6:93952057-93951998	hs|6q16.1	GGGGCAGTTCACAATTTTCACCATTTAAACACAAATTTGCTGCACAGAATATCACCATTG
A_21_P0012283	3.11111	3.11111	1.63743	up	148.899	297.342	-3.81469	-2.17726	Detected	Detected	0	NM_001288833	NM_001288833	NM_001288833	Hs.645535	2678	GGT1	gamma-glutamyltransferase 1	ENST00000453783	THC2578536	GO:0002682(regulation of immune system process)|GO:0003840(gamma-glutamyltransferase activity)|GO:0005515(protein binding)|GO:0005615(extracellular space)|GO:0005886(plasma membrane)|GO:0006508(proteolysis)|GO:0006520(cellular amino acid metabolic process)|GO:0006536(glutamate metabolic process)|GO:0006691(leukotriene metabolic process)|GO:0006749(glutathione metabolic process)|GO:0006750(glutath…	"Homo sapiens gamma-glutamyltransferase 1 (GGT1), transcript variant 6, mRNA [NM_001288833]"	chr22:25007149-25007208	hs|22q11.23	ACAACCATGTGTACACCAGGGCTGCCGTGGCCGCGGATGCCAAGCAGTGCTTGGAGATTG
A_33_P3234043	3.28142	3.28142	1.71432	up	44.2292	93.1577	-5.56596	-3.85164	Not Detected	Detected	0	ENST00000471755		AK291620	Hs.1274	649	BMP1	bone morphogenetic protein 1	ENST00000471755	THC2477847	GO:0001501(skeletal system development)|GO:0001502(cartilage condensation)|GO:0001503(ossification)|GO:0004222(metalloendopeptidase activity)|GO:0005125(cytokine activity)|GO:0005509(calcium ion binding)|GO:0005576(extracellular region)|GO:0005578(proteinaceous extracellular matrix)|GO:0005615(extracellular space)|GO:0005794(Golgi apparatus)|GO:0006508(proteolysis)|GO:0007275(multicellular organi…	bone morphogenetic protein 1 [Source:HGNC Symbol;Acc:HGNC:1067] [ENST00000471755]	chr8:22053703-22053762	hs|8p21.3	ATCTACAGGTTGGGAAACCCCTGTTGTGGGACAGACACTGTTTCCGCCTCTCCACGCATG
A_33_P3239347	3.12752	3.12752	1.64502	up	6140.11	12326	1.55116	3.19618	Detected	Detected	0	NM_006167	NM_006167	NM_006167	Hs.55999	4824	NKX3-1	NK3 homeobox 1	ENST00000380871	THC2607070	"GO:0000976(transcription regulatory region sequence-specific DNA binding)|GO:0000983(RNA polymerase II core promoter sequence-specific DNA binding transcription factor activity)|GO:0001047(core promoter binding)|GO:0001656(metanephros development)|GO:0001756(somitogenesis)|GO:0001934(positive regulation of protein phosphorylation)|GO:0003700(sequence-specific DNA binding transcription factor act…	"Homo sapiens NK3 homeobox 1 (NKX3-1), transcript variant 1, mRNA [NM_006167]"	chr8:23536992-23536933	hs|8p21.2	CAACAAAACAATTACTAATGAGGTACGCTGAGGCCTGGGAGTCTCTTGACTCCACTACTT
A_33_P3267814	7.61055	7.61055	2.928	up	550.049	2686.98	-1.92947	0.998529	Detected	Detected	0	NM_001136004	NM_001136004	NM_001136004	Hs.528024	57553	MICAL3	"microtubule associated monooxygenase, calponin and LIM domain containing 3"		THC2497839	"GO:0003779(actin binding)|GO:0005634(nucleus)|GO:0005654(nucleoplasm)|GO:0005737(cytoplasm)|GO:0005856(cytoskeleton)|GO:0005886(plasma membrane)|GO:0006887(exocytosis)|GO:0007010(cytoskeleton organization)|GO:0008270(zinc ion binding)|GO:0016709(oxidoreductase activity, acting on paired donors, with incorporation or reduction of molecular oxygen, NADH or NADPH as one donor, and incorporation of …	"Homo sapiens microtubule associated monooxygenase, calponin and LIM domain containing 3 (MICAL3), transcript variant 2, mRNA [NM_001136004]"	chr22:18343047-18342988	hs|22q11.21	GTTTTTATTTAATTGTGTAACTTTGTTTTTGCCGTTGACTGTGAAACCAAGTTGTCGTGC
A_33_P3368159	11.3953	11.3953	3.51036	up	12.0843	88.3882	-7.43782	-3.92746	Not Detected	Detected	0	NM_032214	NM_032214	NM_032214	Hs.713578	84174	SLA2	Src-like-adaptor 2	ENST00000360672	THC2473105	GO:0000122(negative regulation of transcription from RNA polymerase II promoter)|GO:0005070(SH3/SH2 adaptor activity)|GO:0005515(protein binding)|GO:0005737(cytoplasm)|GO:0005770(late endosome)|GO:0005886(plasma membrane)|GO:0009967(positive regulation of signal transduction)|GO:0010008(endosome membrane)|GO:0016023(cytoplasmic membrane-bounded vesicle)|GO:0019724(B cell mediated immunity)|GO:003…	"Homo sapiens Src-like-adaptor 2 (SLA2), transcript variant 1, mRNA [NM_032214]"	chr20:35242768-35242709	hs|20q11.23	AGGATATACCCCTACCTGTGACTGTGCAGAGGACACCACTCAACTGGAAAGAGCTGGACA
A_33_P3364180	3.06001	3.06001	1.61354	up	364.635	716.19	-2.52258	-0.909043	Detected	Detected	0	NM_152536	NM_152536	NM_152536	Hs.412406	152273	FGD5	"FYVE, RhoGEF and PH domain containing 5"	ENST00000285046	THC2678294	GO:0001726(ruffle)|GO:0005085(guanyl-nucleotide exchange factor activity)|GO:0005089(Rho guanyl-nucleotide exchange factor activity)|GO:0005515(protein binding)|GO:0005737(cytoplasm)|GO:0005769(early endosome)|GO:0005783(endoplasmic reticulum)|GO:0005794(Golgi apparatus)|GO:0005856(cytoskeleton)|GO:0007010(cytoskeleton organization)|GO:0008360(regulation of cell shape)|GO:0030027(lamellipodium)|G…	"Homo sapiens FYVE, RhoGEF and PH domain containing 5 (FGD5), mRNA [NM_152536]"	chr3:14975836-14975895	hs|3p25.1	GGGCATGTGAGGGGTGGGATTCCTTGTTACTCTTACTGCAATAAAAATCAATTGTTTGAT
A_23_P7976	3.09737	3.09737	1.63104	up	18281	36344.7	3.12517	4.75621	Detected	Detected	0	NM_005321	NM_005321	NM_005321	Hs.248133	3008	HIST1H1E	"histone cluster 1, H1e"	ENST00000304218	THC2478381	GO:0000786(nucleosome)|GO:0005515(protein binding)|GO:0005634(nucleus)|GO:0005720(nuclear heterochromatin)|GO:0006334(nucleosome assembly)|GO:0016584(nucleosome positioning)|GO:0031490(chromatin DNA binding)|GO:0070062(extracellular vesicular exosome)	"Homo sapiens histone cluster 1, H1e (HIST1H1E), mRNA [NM_005321]"	chr6:26156928-26156987	hs|6p22.2	TCCTTCAAACTCAACAAGAAGGCGGCCTCTGGGGAAGCCAAGCCTAAGGCTAAAAAGGCA
A_21_P0000590	6.62313	6.62313	2.72751	up	659.339	2802.98	-1.66801	1.0595	Detected	Detected	0	NR_033258	NR_033258	NR_033258	Hs.34871	9839	ZEB2	zinc finger E-box binding homeobox 2		THC2475209	"GO:0000122(negative regulation of transcription from RNA polymerase II promoter)|GO:0001755(neural crest cell migration)|GO:0001756(somitogenesis)|GO:0001843(neural tube closure)|GO:0003677(DNA binding)|GO:0005634(nucleus)|GO:0006351(transcription, DNA-dependent)|GO:0007399(nervous system development)|GO:0019208(phosphatase regulator activity)|GO:0021766(hippocampus development)|GO:0021846(cell …	"Homo sapiens zinc finger E-box binding homeobox 2 (ZEB2), transcript variant 3, non-coding RNA [NR_033258]"	chr2:145269032-145268973	hs|2q22.3	GACAGTCATGTCAGAGTGAAATCTCTCAGGAAAAGTGTAACTAGTAGTTACAAAGTAAAT
A_23_P436281	2.89636	2.89636	1.53424	up	2515.55	4676.63	0.26377	1.79801	Detected	Detected	0	NM_001034077	NM_001034077	NM_001034077	Hs.706635	554313	HIST2H4B	"histone cluster 2, H4b"	ENST00000578186	THC2479881	"GO:0000183(chromatin silencing at rDNA)|GO:0000228(nuclear chromosome)|GO:0000278(mitotic cell cycle)|GO:0000723(telomere maintenance)|GO:0000786(nucleosome)|GO:0003677(DNA binding)|GO:0005515(protein binding)|GO:0005576(extracellular region)|GO:0005634(nucleus)|GO:0005654(nucleoplasm)|GO:0006325(chromatin organization)|GO:0006334(nucleosome assembly)|GO:0006335(DNA replication-dependent nucleos…	"Homo sapiens histone cluster 2, H4b (HIST2H4B), mRNA [NM_001034077]"	chr1:149804396-149804455	hs|1q21.2	CTCATTTACGAGGAGACCCGCGGTGTGCTGAAGGTGTTCCTGGAGAATGTGATTCGGGAC
A_24_P323598	4.85962	4.85962	2.28084	up	128.624	401.21	-4.02587	-1.74503	Detected	Detected	0	NM_001017420	NM_001017420	NM_001017420	Hs.99480	157570	ESCO2	establishment of sister chromatid cohesion N-acetyltransferase 2	ENST00000305188	THC2470411	GO:0000278(mitotic cell cycle)|GO:0000785(chromatin)|GO:0001741(XY body)|GO:0002244(hemopoietic progenitor cell differentiation)|GO:0004468(lysine N-acetyltransferase activity)|GO:0005634(nucleus)|GO:0005654(nucleoplasm)|GO:0005794(Golgi apparatus)|GO:0006275(regulation of DNA replication)|GO:0006302(double-strand break repair)|GO:0007059(chromosome segregation)|GO:0010369(chromocenter)|GO:003161…	"Homo sapiens establishment of sister chromatid cohesion N-acetyltransferase 2 (ESCO2), mRNA [NM_001017420]"	chr8:27662101-27662160	hs|8p21.1	ATTGTTTTGATTCTGAAAAATCATTCAACTGCTAACTGGCAATAAGACTCTAGGCAAGTC
A_24_P923251	3.27469	3.27469	1.71136	up	3901.17	8199.99	0.896805	2.60817	Detected	Detected	0	NM_198951	NM_198951	NM_198951	Hs.517033	7052	TGM2	transglutaminase 2	ENST00000468262	THC2659478	GO:0001974(blood vessel remodeling)|GO:0003810(protein-glutamine gamma-glutamyltransferase activity)|GO:0005515(protein binding)|GO:0005525(GTP binding)|GO:0005739(mitochondrion)|GO:0005829(cytosol)|GO:0005886(plasma membrane)|GO:0005925(focal adhesion)|GO:0018153(isopeptide cross-linking via N6-(L-isoglutamyl)-L-lysine)|GO:0019904(protein domain specific binding)|GO:0032471(reduction of endoplas…	"Homo sapiens transglutaminase 2 (TGM2), transcript variant 2, mRNA [NM_198951]"	chr20:36766505-36766446	hs|20q11.23	TGTGTTCCTGGAGCATTTGTTGACCGCCAACTGACATCATGCTAGGTAGTGACCTAACCA
A_24_P38290	11.663	11.663	3.54386	up	29.599	221.582	-6.14541	-2.60154	Not Detected	Detected	0	NM_003182	NM_003182	NM_003182	Hs.2563	6863	TAC1	"tachykinin, precursor 1"	ENST00000350485	THC2473830	"GO:0002675(positive regulation of acute inflammatory response)|GO:0005515(protein binding)|GO:0005576(extracellular region)|GO:0005615(extracellular space)|GO:0005886(plasma membrane)|GO:0006954(inflammatory response)|GO:0007204(elevation of cytosolic calcium ion concentration)|GO:0007217(tachykinin receptor signaling pathway)|GO:0007218(neuropeptide signaling pathway)|GO:0007267(cell-cell signa…	"Homo sapiens tachykinin, precursor 1 (TAC1), transcript variant beta, mRNA [NM_003182]"	chr7:97369454-97369513	hs|7q21.3	CTCAACAAAGCACAGTGTTAAATGAAATTGTAAAACCTGTCAATGATACAGTCCCTAAAG
A_23_P372860	7.16409	7.16409	2.84078	up	307.763	1415.22	-2.76721	0.0735713	Detected	Detected	0	NM_003512	NM_003512	NM_003512	Hs.484950	8334	HIST1H2AC	"histone cluster 1, H2ac"	ENST00000377791	THC2611545	GO:0000786(nucleosome)|GO:0003674(molecular_function)|GO:0003677(DNA binding)|GO:0005634(nucleus)|GO:0008150(biological_process)|GO:0046982(protein heterodimerization activity)|GO:0070062(extracellular vesicular exosome)	"Homo sapiens histone cluster 1, H2ac (HIST1H2AC), mRNA [NM_003512]"	chr6:26124403-26124462	hs|6p22.2	TTTGTTTGTTTTCTCGTGAGCTTAGGCCGCTGGTTTTGGTGATTTTTGTCTGATTGCAAT
A_32_P221799	3.11778	3.11778	1.64052	up	1065.4	2132.1	-0.975703	0.664818	Detected	Detected	0	NM_003514	NM_003514	NM_003514	Hs.134999	8336	HIST1H2AM	"histone cluster 1, H2am"		THC2478312	GO:0000786(nucleosome)|GO:0003677(DNA binding)|GO:0005515(protein binding)|GO:0005634(nucleus)|GO:0008150(biological_process)|GO:0019899(enzyme binding)|GO:0046982(protein heterodimerization activity)|GO:0070062(extracellular vesicular exosome)	"Homo sapiens histone cluster 1, H2am (HIST1H2AM), mRNA [NM_003514]"	chr6:27860566-27860507	hs|6p22.1	CTGAGAGCCACCACAAAGCTAAGGGCAAGTAAGGGCTGAACTTTAAAAATGTAAACTTAC
A_33_P3325748	3.67432	3.67432	1.87748	up	1258.72	2968.61	-0.735147	1.14233	Detected	Detected	0	NM_138632	NM_138632	NM_138632	Hs.533030	11078	TRIOBP	TRIO and F-actin binding protein	ENST00000407319	THC2477785	GO:0005634(nucleus)|GO:0005737(cytoplasm)|GO:0005815(microtubule organizing center)|GO:0005925(focal adhesion)|GO:0007067(mitosis)|GO:0015629(actin cytoskeleton)|GO:0017049(GTP-Rho binding)|GO:0030047(actin modification)|GO:0030496(midbody)|GO:0031625(ubiquitin protein ligase binding)|GO:0045159(myosin II binding)|GO:0051015(actin filament binding)|GO:0051016(barbed-end actin filament capping)|GO…	"Homo sapiens TRIO and F-actin binding protein (TRIOBP), transcript variant 2, mRNA [NM_138632]"	chr22:38155900-38155959	hs|22q13.1	TACCAATAAAAACAATGCTTAGTACACAATTTACAAATAAAAATATATAATTTTATTGTG
A_23_P363174	7.12513	7.12513	2.83292	up	69.0886	315.97	-4.92251	-2.0896	Detected	Detected	0	NM_003511	NM_003511	NM_003511	Hs.233568	8332	HIST1H2AL	"histone cluster 1, H2al"		THC2484792	GO:0000786(nucleosome)|GO:0003677(DNA binding)|GO:0005515(protein binding)|GO:0005634(nucleus)|GO:0008150(biological_process)|GO:0019899(enzyme binding)|GO:0046982(protein heterodimerization activity)|GO:0070062(extracellular vesicular exosome)	"Homo sapiens histone cluster 1, H2al (HIST1H2AL), mRNA [NM_003511]"	chr6:27833502-27833561	hs|6p22.1	CACCACAAGGCCAAAGGCAAATAATGTCTCCATAGAATCACTTTCCAATACAACGGCTCT
A_33_P3372840	3.10464	3.10464	1.63443	up	49.5492	98.7406	-5.4021	-3.76767	Not Detected	Detected	0	NM_001033886	NM_001033886	NM_001033886	Hs.522891	6387	CXCL12	chemokine (C-X-C motif) ligand 12	ENST00000374426	THC2490444	GO:0001569(patterning of blood vessels)|GO:0001666(response to hypoxia)|GO:0001667(ameboidal cell migration)|GO:0001764(neuron migration)|GO:0001938(positive regulation of endothelial cell proliferation)|GO:0005102(receptor binding)|GO:0005576(extracellular region)|GO:0005615(extracellular space)|GO:0006874(cellular calcium ion homeostasis)|GO:0006935(chemotaxis)|GO:0006955(immune response)|GO:00…	"Homo sapiens chemokine (C-X-C motif) ligand 12 (CXCL12), transcript variant 3, mRNA [NM_001033886]"	chr10:44871424-44871365	hs|10q11.21	AGAAGAAGAGAAAGGCTGCCCAGAAAAGGAAAAACTAGTTATCTGCCACCTCGAGATGGA
A_23_P168993	4.05084	4.05084	2.01822	up	31.904	82.954	-6.03722	-4.019	Not Detected	Detected	0	NM_000025	NM_000025	NM_000025	Hs.2549	155	ADRB3	adrenoceptor beta 3	ENST00000614635	THC2474800	"GO:0002024(diet induced thermogenesis)|GO:0002025(vasodilation by norepinephrine-epinephrine involved in regulation of systemic arterial blood pressure)|GO:0002032(desensitization of G-protein coupled receptor protein signaling pathway by arrestin)|GO:0004939(beta-adrenergic receptor activity)|GO:0005515(protein binding)|GO:0005634(nucleus)|GO:0005886(plasma membrane)|GO:0005887(integral to plas…	"Homo sapiens adrenoceptor beta 3 (ADRB3), mRNA [NM_000025]"	chr8:37821117-37821058	hs|8p11.23	TGCAATCAGATAAATAAATATCACTGAATGCAGTTCATCCTCGGCCCACTTTCCCTCCGT
A_33_P3413325	12.1163	12.1163	3.59887	up	320.719	2494.26	-2.70772	0.891152	Detected	Detected	0	NM_001271520	NM_001271520	NM_001271520	Hs.144795	3778	KCNMA1	"potassium channel, calcium activated large conductance subfamily M alpha, member 1"	ENST00000618048	THC2482086	GO:0001666(response to hypoxia)|GO:0003779(actin binding)|GO:0005249(voltage-gated potassium channel activity)|GO:0005515(protein binding)|GO:0005886(plasma membrane)|GO:0005901(caveola)|GO:0006813(potassium ion transport)|GO:0006970(response to osmotic stress)|GO:0007268(synaptic transmission)|GO:0007596(blood coagulation)|GO:0008076(voltage-gated potassium channel complex)|GO:0015269(calcium-ac…	"Homo sapiens potassium channel, calcium activated large conductance subfamily M alpha, member 1 (KCNMA1), transcript variant 7, mRNA [NM_001271520]"	chr10:79396578-79396519	hs|10q22.3	ACTTTAGGAACCTGTTGGGGAGATGAGTTCGTGGGGTCAGAAAGAAGGGAAAAATCCTTT
A_23_P404678	3.67843	3.67843	1.87909	up	32.3967	76.491	-6.01511	-4.13602	Not Detected	Detected	0	NM_004283	NM_004283	NM_004283	Hs.744916	9545	RAB3D	"RAB3D, member RAS oncogene family"	ENST00000222120	THC2473791	GO:0003924(GTPase activity)|GO:0005525(GTP binding)|GO:0005739(mitochondrion)|GO:0005768(endosome)|GO:0005886(plasma membrane)|GO:0006886(intracellular protein transport)|GO:0006904(vesicle docking involved in exocytosis)|GO:0008021(synaptic vesicle)|GO:0009306(protein secretion)|GO:0016079(synaptic vesicle exocytosis)|GO:0017157(regulation of exocytosis)|GO:0018125(peptidyl-cysteine methylation)…	"Homo sapiens RAB3D, member RAS oncogene family (RAB3D), mRNA [NM_004283]"	chr19:11435349-11435290	hs|19p13.2	TTCACCACATCTCTGATCCTGAAGTGAATTCTGGAACTATGGACCACATTAGACTGGGCA
A_33_P3422030	22.3326	22.3326	4.48108	up	12.1034	173.497	-7.43555	-2.95447	Not Detected	Detected	0	ENST00000392218				53827	FXYD5	FXYD domain containing ion transport regulator 5	ENST00000392218		GO:0003779(actin binding)|GO:0005216(ion channel activity)|GO:0016021(integral to membrane)|GO:0030033(microvillus assembly)|GO:0034220(ion transmembrane transport)|GO:0045296(cadherin binding)|GO:0046588(negative regulation of calcium-dependent cell-cell adhesion)	FXYD domain containing ion transport regulator 5 [Source:HGNC Symbol;Acc:HGNC:4029] [ENST00000392218]	chr19:35650773-35650832	hs|19q13.12	ACAATACAGGGCAAAGGACATGCATGCTTAATGTTTTAAAATTTGCCCTCCTGCCGCCCA
A_33_P3268910	2.91016	2.91016	1.5411	up	6287.41	11744.5	1.58536	3.12646	Detected	Detected	0	NM_001258038	NM_001258038	NM_001258038	Hs.744854	10252	SPRY1	"sprouty homolog 1, antagonist of FGF signaling (Drosophila)"	ENST00000505319	THC2656683	GO:0000132(establishment of mitotic spindle orientation)|GO:0001656(metanephros development)|GO:0001657(ureteric bud development)|GO:0001759(organ induction)|GO:0005515(protein binding)|GO:0005829(cytosol)|GO:0005886(plasma membrane)|GO:0007173(epidermal growth factor receptor signaling pathway)|GO:0008285(negative regulation of cell proliferation)|GO:0034261(negative regulation of Ras GTPase act…	"Homo sapiens sprouty homolog 1, antagonist of FGF signaling (Drosophila) (SPRY1), transcript variant 1, mRNA [NM_001258038]"	chr4:124318918-124318977	hs|4q28.1	AAGGGACGACGCCCGCCTTTCTCTCTCCGAGAAGGATCCCCAAACCTCACTCTCTTCACT
A_23_P117602	3.77694	3.77694	1.91722	up	34.0076	82.4449	-5.9451	-4.02788	Not Detected	Detected	0	NM_004131	NM_004131	NM_004131	Hs.1051	3002	GZMB	"granzyme B (granzyme 2, cytotoxic T-lymphocyte-associated serine esterase 1)"	ENST00000382542	NP1073088	GO:0001772(immunological synapse)|GO:0004252(serine-type endopeptidase activity)|GO:0005515(protein binding)|GO:0005634(nucleus)|GO:0005737(cytoplasm)|GO:0005829(cytosol)|GO:0006508(proteolysis)|GO:0006915(apoptotic process)|GO:0006955(immune response)|GO:0007219(Notch signaling pathway)|GO:0008236(serine-type peptidase activity)|GO:0008626(induction of apoptosis by granzyme)|GO:0016020(membrane)…	"Homo sapiens granzyme B (granzyme 2, cytotoxic T-lymphocyte-associated serine esterase 1) (GZMB), mRNA [NM_004131]"	chr14:25100295-25100236	hs|14q12	AACCATGAAACGCTACTAACTACAGGAAGCAAACTAAGCCCCCGCTGTAATGAAACACCT
A_24_P124558	2.91621	2.91621	1.54409	up	6455.7	12084	1.62347	3.16756	Detected	Detected	0	NM_022658	NM_022658	NM_022658	Hs.664500	3224	HOXC8	homeobox C8		THC2479037	"GO:0000122(negative regulation of transcription from RNA polymerase II promoter)|GO:0003700(sequence-specific DNA binding transcription factor activity)|GO:0005654(nucleoplasm)|GO:0006351(transcription, DNA-dependent)|GO:0009952(anterior/posterior pattern specification)|GO:0015630(microtubule cytoskeleton)|GO:0030182(neuron differentiation)|GO:0043565(sequence-specific DNA binding)|GO:0048705(sk…	"Homo sapiens homeobox C8 (HOXC8), mRNA [NM_022658]"	chr12:54406311-54406370	hs|12q13.13	CCCCAGTAGAGTAGAACTAAATTGCACTGAATGTATAGTTAACTCTGTCTTGAATTCTCT
A_24_P20873	2.91878	2.91878	1.54537	up	947.199	1774.56	-1.14536	0.400003	Detected	Detected	0	NM_003495	NM_003495	NM_003495	Hs.248172	8294	HIST1H4I	"histone cluster 1, H4i"	ENST00000615353	THC2475380	"GO:0000183(chromatin silencing at rDNA)|GO:0000228(nuclear chromosome)|GO:0000278(mitotic cell cycle)|GO:0000723(telomere maintenance)|GO:0000786(nucleosome)|GO:0003677(DNA binding)|GO:0005515(protein binding)|GO:0005576(extracellular region)|GO:0005634(nucleus)|GO:0005654(nucleoplasm)|GO:0006325(chromatin organization)|GO:0006334(nucleosome assembly)|GO:0006335(DNA replication-dependent nucleos…	"Homo sapiens histone cluster 1, H4i (HIST1H4I), mRNA [NM_003495]"	chr6:27107225-27107284	hs|6p22.1	CATTTCTGGCCTCATCTATGAGGAGACCCGCGGAGTGTTGAAGGTGTTCCTGGAGAACGT
A_23_P58046	7.68581	7.68581	2.9422	up	21.15	104.339	-6.6303	-3.6881	Not Detected	Detected	0	NM_016161	NM_016161	NM_016161	Hs.278960	51146	A4GNT	"alpha-1,4-N-acetylglucosaminyltransferase"	ENST00000236709	THC2485728	GO:0000139(Golgi membrane)|GO:0005975(carbohydrate metabolic process)|GO:0006493(protein O-linked glycosylation)|GO:0008375(acetylglucosaminyltransferase activity)|GO:0009101(glycoprotein biosynthetic process)|GO:0016020(membrane)|GO:0016021(integral to membrane)|GO:0050680(negative regulation of epithelial cell proliferation)	"Homo sapiens alpha-1,4-N-acetylglucosaminyltransferase (A4GNT), mRNA [NM_016161]"	chr3:137843320-137843261	hs|3q22.3	GCTACTATGAAGTGTGGGATACAGAGCCAAGCTTCAATGTCTCTTATGCCCTGCATTTGT
A_23_P415411	3.30926	3.30926	1.72651	up	476.088	1011.27	-2.1378	-0.411293	Detected	Detected	0	NM_003545	NM_003545	NM_003545	Hs.662174	8367	HIST1H4E	"histone cluster 1, H4e"		THC2560502	"GO:0000183(chromatin silencing at rDNA)|GO:0000228(nuclear chromosome)|GO:0000278(mitotic cell cycle)|GO:0000723(telomere maintenance)|GO:0000786(nucleosome)|GO:0003677(DNA binding)|GO:0005515(protein binding)|GO:0005576(extracellular region)|GO:0005634(nucleus)|GO:0005654(nucleoplasm)|GO:0006325(chromatin organization)|GO:0006334(nucleosome assembly)|GO:0006335(DNA replication-dependent nucleos…	"Homo sapiens histone cluster 1, H4e (HIST1H4E), mRNA [NM_003545]"	chr6:26205172-26205231	hs|6p22.2	CTTCGGCGGCTAATGCTACCGCTTAAACGACTCAGCATCTCGACTTCCCAAATCAAAGGC
A_33_P3397658	3.35433	3.35433	1.74603	up	1409.14	3033.94	-0.572291	1.17373	Detected	Detected	0	ENST00000394243				11346	SYNPO	synaptopodin	ENST00000394243	THC2678964	GO:0001725(stress fiber)|GO:0003779(actin binding)|GO:0005515(protein binding)|GO:0005737(cytoplasm)|GO:0005923(tight junction)|GO:0014069(postsynaptic density)|GO:0015629(actin cytoskeleton)|GO:0032233(positive regulation of actin filament bundle assembly)|GO:0043197(dendritic spine)|GO:0043204(perikaryon)|GO:0045211(postsynaptic membrane)|GO:0051492(regulation of stress fiber assembly)	synaptopodin [Source:HGNC Symbol;Acc:HGNC:30672] [ENST00000394243]	chr5:150033735-150033794	hs|5q33.1	ACTCTGGTGGATGACTGCTAGTGAATTTGGATTGGATTAAATGGCAAGGTGGACTGGTTA
A_23_P95060	3.727	3.727	1.89801	up	244.437	584.755	-3.09957	-1.20155	Detected	Detected	0	NM_004443	NM_004443	NM_004443	Hs.2913	2049	EPHB3	EPH receptor B3	ENST00000330394	THC2464788	GO:0001525(angiogenesis)|GO:0001655(urogenital system development)|GO:0005003(ephrin receptor activity)|GO:0005524(ATP binding)|GO:0005576(extracellular region)|GO:0005829(cytosol)|GO:0005886(plasma membrane)|GO:0005887(integral to plasma membrane)|GO:0007411(axon guidance)|GO:0007413(axonal fasciculation)|GO:0008046(axon guidance receptor activity)|GO:0016477(cell migration)|GO:0018108(peptidyl-…	"Homo sapiens EPH receptor B3 (EPHB3), mRNA [NM_004443]"	chr3:184299825-184299884	hs|3q27.1	AACTGGAGGAGGGGACTCCAGGAATGGGGAAATGTGACACCACCATCCTGAAGCCAGCTT
A_23_P311632	11.1869	11.1869	3.48374	up	32.4781	233.211	-6.01149	-2.52775	Not Detected	Detected	0	NM_138329	NM_138329	NM_138329	Hs.352611	171389	NLRP6	"NLR family, pyrin domain containing 6"	ENST00000312165	THC2604040	GO:0005000(vasopressin receptor activity)|GO:0005524(ATP binding)|GO:0005737(cytoplasm)|GO:0005886(plasma membrane)|GO:0007186(G-protein coupled receptor signaling pathway)|GO:0009617(response to bacterium)|GO:0010506(regulation of autophagy)|GO:0031965(nuclear membrane)|GO:0034122(negative regulation of toll-like receptor signaling pathway)|GO:0042060(wound healing)|GO:0043124(negative regulatio…	"Homo sapiens NLR family, pyrin domain containing 6 (NLRP6), transcript variant 1, mRNA [NM_138329]"	chr11:285183-285242	hs|11p15.5	TGAGCGAGCAGTCACTACAGGAGCTTCAGGCTGTGAAGAGAGCAAAGCCGGATCTGGTCA
A_24_P72364	6.05878	6.05878	2.59903	up	25.8997	100.723	-6.33802	-3.73899	Not Detected	Detected	0	NM_014070	NM_014070	NM_014070	Hs.272214	29113	C6orf15	chromosome 6 open reading frame 15	ENST00000259870	THC2481957	GO:0001968(fibronectin binding)|GO:0003674(molecular_function)|GO:0005540(hyaluronic acid binding)|GO:0005575(cellular_component)|GO:0005614(interstitial matrix)|GO:0008150(biological_process)|GO:0008201(heparin binding)|GO:0030198(extracellular matrix organization)|GO:0043236(laminin binding)|GO:0070052(collagen V binding)	"Homo sapiens chromosome 6 open reading frame 15 (C6orf15), mRNA [NM_014070]"	chr6:31079395-31079336	hs|6p21.33	TACCAGCTGGGGAAATATTAATCGGTATCCAGGAGGCAGCTGGGGAAATATTAATCGGTA
A_33_P3257678	7.0756	7.0756	2.82285	up	286.777	1302.43	-2.8691	-0.046249	Detected	Detected	0	NM_001005464	NM_001005464	NM_001005464	Hs.706618	333932	HIST2H3A	"histone cluster 2, H3a"	ENST00000369158	THC2479197	"GO:0000183(chromatin silencing at rDNA)|GO:0000786(nucleosome)|GO:0003677(DNA binding)|GO:0005515(protein binding)|GO:0005576(extracellular region)|GO:0005634(nucleus)|GO:0005654(nucleoplasm)|GO:0007596(blood coagulation)|GO:0010467(gene expression)|GO:0032776(DNA methylation on cytosine)|GO:0040029(regulation of gene expression, epigenetic)|GO:0045814(negative regulation of gene expression, epi…	"Homo sapiens histone cluster 2, H3a (HIST2H3A), mRNA [NM_001005464]"	chr1:149824626-149824685	hs|1q21.2	AAGAAGTGGCGGTTCGGCCGGAGGTTCCATCGTATCCAAAAGGCTCTTTTCAGAGCCACC
A_33_P3384657	16.0086	16.0086	4.00077	up	15.384	158.077	-7.08953	-3.08875	Not Detected	Detected	0	ENST00000472151				2073	ERCC5	excision repair cross-complementation group 5	ENST00000472151	THC2743690	"GO:0000405(bubble DNA binding)|GO:0000718(nucleotide-excision repair, DNA damage removal)|GO:0000737(DNA catabolic process, endonucleolytic)|GO:0003690(double-stranded DNA binding)|GO:0003697(single-stranded DNA binding)|GO:0004519(endonuclease activity)|GO:0004520(endodeoxyribonuclease activity)|GO:0005515(protein binding)|GO:0005634(nucleus)|GO:0005654(nucleoplasm)|GO:0005662(DNA replication f…	excision repair cross-complementation group 5 [Source:HGNC Symbol;Acc:HGNC:3437] [ENST00000472151]	chr13:103501484-103501543	hs|13q33.1	GCAGAAACATCGATCTAATACAAGACAGATGCACATCAACACCAAGTTCTACCTCTGAGA
A_33_P3234025	9.79779	9.79779	3.29246	up	12.1132	76.1791	-7.43437	-4.14192	Not Detected	Detected	0	XM_005245796	XM_005245796	XM_005245796		23254	KAZN	"kazrin, periplakin interacting protein"		NP1243647	GO:0001533(cornified envelope)|GO:0005634(nucleus)|GO:0005737(cytoplasm)|GO:0005856(cytoskeleton)|GO:0030057(desmosome)|GO:0031424(keratinization)	"PREDICTED: Homo sapiens kazrin, periplakin interacting protein (KAZN), transcript variant X2, mRNA [XM_005245796]"	chr1:14507028-14507087	hs|1p36.21	GAGAAGGAGACTCTGAAGAGTTCCATGATATTGATGAGGCACCTCTTAATGGATGCTCAG
A_23_P41942	2.9287	2.9287	1.55026	up	451.139	848.073	-2.21546	-0.665197	Detected	Detected	0	NM_006467	NM_006467	NM_006467	Hs.282387	10622	POLR3G	polymerase (RNA) III (DNA directed) polypeptide G (32kD)	ENST00000622335	THC2626992	GO:0000790(nuclear chromatin)|GO:0001056(RNA polymerase III activity)|GO:0003899(DNA-directed RNA polymerase activity)|GO:0005654(nucleoplasm)|GO:0005666(DNA-directed RNA polymerase III complex)|GO:0005829(cytosol)|GO:0006359(regulation of transcription from RNA polymerase III promoter)|GO:0006383(transcription from RNA polymerase III promoter)|GO:0006384(transcription initiation from RNA polymer…	"Homo sapiens polymerase (RNA) III (DNA directed) polypeptide G (32kD) (POLR3G), mRNA [NM_006467]"	chr5:89781367-89781426	hs|5q14.3	CTGGTATAACTGGTTCTGATGGCTGGGAATAAAGGAAGAGGACGTGCTGCTTATACCTTT
A_33_P3295313	15.6284	15.6284	3.9661	up	12.0812	121.191	-7.4382	-3.4721	Not Detected	Detected	0	NM_000139	NM_000139	NM_000139	Hs.386748	2206	MS4A2	"membrane-spanning 4-domains, subfamily A, member 2"	ENST00000440896	THC2482839	GO:0005768(endosome)|GO:0005886(plasma membrane)|GO:0005887(integral to plasma membrane)|GO:0006954(inflammatory response)|GO:0006955(immune response)|GO:0007202(activation of phospholipase C activity)|GO:0007205(protein kinase C-activating G-protein coupled receptor signaling pathway)|GO:0009897(external side of plasma membrane)|GO:0019767(IgE receptor activity)|GO:0019863(IgE binding)|GO:001990…	"Homo sapiens membrane-spanning 4-domains, subfamily A, member 2 (MS4A2), transcript variant 1, mRNA [NM_000139]"	chr11:59861439-59861498	hs|11q12.1	AATTGTAGTGATGATGCTGTTTCTCACCATTCTGGGACTTGGTAGTGCTGTGTCACTCAC
A_33_P3286754	3.31978	3.31978	1.73109	up	863.033	1839.01	-1.27962	0.451474	Detected	Detected	0	NM_033382	NM_033382	NM_033382	Hs.335614	23541	SEC14L2	SEC14-like 2 (S. cerevisiae)	ENST00000405717	THC2482759	"GO:0005215(transporter activity)|GO:0005543(phospholipid binding)|GO:0005634(nucleus)|GO:0005737(cytoplasm)|GO:0006351(transcription, DNA-dependent)|GO:0006810(transport)|GO:0008431(vitamin E binding)|GO:0016021(integral to membrane)|GO:0045540(regulation of cholesterol biosynthetic process)|GO:0045893(positive regulation of transcription, DNA-dependent)|GO:0070062(extracellular vesicular exosom…	"Homo sapiens SEC14-like 2 (S. cerevisiae) (SEC14L2), transcript variant 2, mRNA [NM_033382]"	chr22:30812904-30812963	hs|22q12.2	GAAAAGGTGCTTAATCTCTCTTAACTTTGTAATACCATTAAAATTCCCCTTGACTCAGCA
A_33_P3248638	3.92658	3.92658	1.97327	up	72.025	181.529	-4.86246	-2.88919	Detected	Detected	0	NM_001001938	NM_001001938	NM_001001938	Hs.585118	286223	C9orf47	chromosome 9 open reading frame 47	ENST00000375851	THC2480028	GO:0005576(extracellular region)	"Homo sapiens chromosome 9 open reading frame 47 (C9orf47), transcript variant 1, mRNA [NM_001001938]"	chr9:91606869-91606928	hs|9q22.1	AGAAGTTCCATCAGTCGTTTTCCTTGGACAATTAACAAGTTAGGCTTCCACAGTGCCAGG
A_23_P320846	11.5875	11.5875	3.5345	up	12.3248	91.668	-7.4094	-3.8749	Not Detected	Detected	0	NM_153325	NM_153325	NM_153325	Hs.380220	245938	DEFB125	"defensin, beta 125"	ENST00000382410	THC2620410	GO:0005576(extracellular region)|GO:0009986(cell surface)|GO:0042742(defense response to bacterium)|GO:0045087(innate immune response)	"Homo sapiens defensin, beta 125 (DEFB125), mRNA [NM_153325]"	chr20:76732-76791	hs|20p13	TGTAGGAACAAGCTATCATGCTGCATTTCTATAATATCACATGAATATACTCGACGACCA
A_33_P3269924	12.7797	12.7797	3.67578	up	46.0826	378.012	-5.50674	-1.83095	Not Detected	Detected	0	NM_001303099	NM_001303099	NM_001303099	Hs.524815	9026	HIP1R	huntingtin interacting protein 1 related	ENST00000535831	THC2616922	"GO:0003779(actin binding)|GO:0005515(protein binding)|GO:0005737(cytoplasm)|GO:0005856(cytoskeleton)|GO:0005905(coated pit)|GO:0006898(receptor-mediated endocytosis)|GO:0030036(actin cytoskeleton organization)|GO:0030136(clathrin-coated vesicle)|GO:0030665(clathrin coated vesicle membrane)|GO:0030674(protein binding, bridging)|GO:0035091(phosphatidylinositol binding)|GO:0043231(intracellular mem…	"Homo sapiens huntingtin interacting protein 1 related (HIP1R), transcript variant 3, mRNA [NM_001303099]"	chr12:123319405-123319464	hs|12q24.31	AGAGGGGAGAGTGTCATTGTGTGCCTTTTGACACATACATTAAGACCAAAAAGGAAAAAA
A_23_P355517	2.48561	2.48561	1.3136	up	123.748	197.433	-4.08162	-2.76802	Detected	Detected	0	NM_024875	NM_024875	NM_024875	Hs.645273	79933	SYNPO2L	synaptopodin 2-like	ENST00000394810	THC2475029	GO:0003779(actin binding)|GO:0005634(nucleus)|GO:0005856(cytoskeleton)|GO:0030018(Z disc)	"Homo sapiens synaptopodin 2-like (SYNPO2L), transcript variant 2, mRNA [NM_024875]"	chr10:75405457-75405398	hs|10q22.2	ACAGCATCTTGTGAAAGTTATGGAGCATGAAAAGACTGAAGGGCCAGGACAGTTTGCATG
A_23_P420196	3.23916	3.23916	1.69562	up	3206.1	6665.87	0.613716	2.30934	Detected	Detected	0	NM_003745	NM_003745	NM_003745	Hs.50640	8651	SOCS1	suppressor of cytokine signaling 1	ENST00000332029	THC2666012	GO:0001932(regulation of protein phosphorylation)|GO:0004860(protein kinase inhibitor activity)|GO:0005159(insulin-like growth factor receptor binding)|GO:0005515(protein binding)|GO:0005634(nucleus)|GO:0005737(cytoplasm)|GO:0005829(cytosol)|GO:0006469(negative regulation of protein kinase activity)|GO:0007259(JAK-STAT cascade)|GO:0016023(cytoplasmic membrane-bounded vesicle)|GO:0016567(protein u…	"Homo sapiens suppressor of cytokine signaling 1 (SOCS1), mRNA [NM_003745]"	chr16:11348443-11348384	hs|16p13.13	ACCTGAACTCGCACCTCCTACCTCTTCATGTTTACATATACCCAGTATCTTTGCACAAAC
A_23_P113005	3.30047	3.30047	1.72267	up	816.009	1728.69	-1.36045	0.362223	Detected	Detected	0	NM_004428	NM_004428	NM_004428	Hs.516664	1942	EFNA1	ephrin-A1	ENST00000469878	THC2506968	GO:0000122(negative regulation of transcription from RNA polymerase II promoter)|GO:0000187(activation of MAPK activity)|GO:0001525(angiogenesis)|GO:0003180(aortic valve morphogenesis)|GO:0003183(mitral valve morphogenesis)|GO:0003199(endocardial cushion to mesenchymal transition involved in heart valve formation)|GO:0005102(receptor binding)|GO:0005515(protein binding)|GO:0005576(extracellular r…	"Homo sapiens ephrin-A1 (EFNA1), transcript variant 1, mRNA [NM_004428]"	chr1:155106767-155106826	hs|1q22	ATGGAGAAAGAAGTGGAGACAGTCCTTTCCCACCATTCCTGCCTTTAAGCCAAAGAAACA
A_23_P125233	2.94227	2.94227	1.55693	up	10010.9	18906	2.25639	3.81332	Detected	Detected	0	NM_001299	NM_001299	NM_001299	Hs.465929	1264	CNN1	"calponin 1, basic, smooth muscle"	ENST00000252456	THC2465951	GO:0003779(actin binding)|GO:0005516(calmodulin binding)|GO:0005856(cytoskeleton)|GO:0005925(focal adhesion)|GO:0006940(regulation of smooth muscle contraction)|GO:0031032(actomyosin structure organization)	"Homo sapiens calponin 1, basic, smooth muscle (CNN1), mRNA [NM_001299]"	chr19:11661005-11661064	hs|19p13.2	AGAGACCCAGCGGACACACGCGGTTTCGTTTGCAGCGACTGGCATACTATGTGGATGTGA
A_33_P3362008	5.8161	5.8161	2.54005	up	4613.04	17221.3	1.13861	3.67867	Detected	Detected	0	NM_002521	NM_002521	NM_002521	Hs.219140	4879	NPPB	natriuretic peptide B	ENST00000376468	THC2474078	GO:0005102(receptor binding)|GO:0005179(hormone activity)|GO:0005576(extracellular region)|GO:0005615(extracellular space)|GO:0006182(cGMP biosynthetic process)|GO:0007166(cell surface receptor signaling pathway)|GO:0007168(receptor guanylyl cyclase signaling pathway)|GO:0007589(body fluid secretion)|GO:0008217(regulation of blood pressure)|GO:0008613(diuretic hormone activity)|GO:0016525(negativ…	"Homo sapiens natriuretic peptide B (NPPB), mRNA [NM_002521]"	chr1:11918391-11918332	hs|1p36.22	CACCGCAAAATGGTCCTCTACACCCTGCGGGCACCACGAAGCCCCAAGATGGTGCAAGGG
A_33_P3223082	4.12883	4.12883	2.04573	up	924.435	2449.92	-1.18046	0.865275	Detected	Detected	0	NM_014763	NM_014763	NM_014763	Hs.44024	9801	MRPL19	mitochondrial ribosomal protein L19		THC2652214	GO:0003735(structural constituent of ribosome)|GO:0005634(nucleus)|GO:0005743(mitochondrial inner membrane)|GO:0005840(ribosome)|GO:0006996(organelle organization)|GO:0031965(nuclear membrane)|GO:0032543(mitochondrial translation)|GO:0070124(mitochondrial translational initiation)|GO:0070125(mitochondrial translational elongation)|GO:0070126(mitochondrial translational termination)	"Homo sapiens mitochondrial ribosomal protein L19 (MRPL19), mRNA [NM_014763]"	chr2:75889260-75889319	hs|2p12	GAGTGATTACACTGGTTGACTAATGTTAAAACAACCTTACTTTCCAGGAATAAACCCTAT
A_23_P151778	12.5721	12.5721	3.65215	up	12.1525	98.0663	-7.42971	-3.77756	Not Detected	Detected	0	NM_001836	NM_001836	NM_001836	Hs.135626	1215	CMA1	"chymase 1, mast cell"	ENST00000250378	THC2480549	GO:0002003(angiotensin maturation)|GO:0004252(serine-type endopeptidase activity)|GO:0005576(extracellular region)|GO:0005615(extracellular space)|GO:0005622(intracellular)|GO:0006508(proteolysis)|GO:0008236(serine-type peptidase activity)|GO:0016485(protein processing)|GO:0022617(extracellular matrix disassembly)|GO:0030198(extracellular matrix organization)|GO:0030901(midbrain development)|GO:0…	"Homo sapiens chymase 1, mast cell (CMA1), mRNA [NM_001836]"	chr14:24975737-24975678	hs|14q12	AAGCAATTCCGTCATCCAAAATATAACACTTCTACTCTTCACCACGATATCATGTTACTA
A_23_P75529	3.48429	3.48429	1.80086	up	146.261	327.108	-3.84048	-2.03962	Detected	Detected	0	NM_022062	NM_022062	NM_022062	Hs.278564	63876	PKNOX2	PBX/knotted 1 homeobox 2	ENST00000526955	NP1167037	GO:0003677(DNA binding)|GO:0003785(actin monomer binding)|GO:0005634(nucleus)|GO:0005737(cytoplasm)|GO:0006357(regulation of transcription from RNA polymerase II promoter)|GO:0015629(actin cytoskeleton)|GO:0015630(microtubule cytoskeleton)|GO:0043565(sequence-specific DNA binding)|GO:0051015(actin filament binding)	"Homo sapiens PBX/knotted 1 homeobox 2 (PKNOX2), mRNA [NM_022062]"	chr11:125302956-125303015	hs|11q24.2	TCATTTTTTACTCCCTTTTGATGCCATACATAGAGGAAAGTCTAGCTTTTTTGGCGTGAG
A_23_P115064	2.95029	2.95029	1.56086	up	4976.82	9424.62	1.24812	2.80898	Detected	Detected	0	NM_001878	NM_001878	NM_001878	Hs.405662	1382	CRABP2	cellular retinoic acid binding protein 2	ENST00000368221	THC2671864	"GO:0001972(retinoic acid binding)|GO:0005215(transporter activity)|GO:0005501(retinoid binding)|GO:0005654(nucleoplasm)|GO:0005737(cytoplasm)|GO:0005783(endoplasmic reticulum)|GO:0005829(cytosol)|GO:0006355(regulation of transcription, DNA-dependent)|GO:0007165(signal transduction)|GO:0008544(epidermis development)|GO:0016918(retinal binding)|GO:0019841(retinol binding)|GO:0035115(embryonic fore…	"Homo sapiens cellular retinoic acid binding protein 2 (CRABP2), transcript variant 1, mRNA [NM_001878]"	chr1:156669638-156669579	hs|1q23.1	CCCTACACCAACAAAGAGGAATGGCTGCAAGAGCCCAGATCACCCATTCCGGGTTCACTC
A_33_P3277447	3.54702	3.54702	1.82661	up	1060.16	2413.7	-0.982816	0.843792	Detected	Detected	0	NM_000112	NM_000112	NM_000112	Hs.302738	1836	SLC26A2	"solute carrier family 26 (anion exchanger), member 2"	ENST00000286298	THC2477870	GO:0001503(ossification)|GO:0005886(plasma membrane)|GO:0005887(integral to plasma membrane)|GO:0005975(carbohydrate metabolic process)|GO:0006805(xenobiotic metabolic process)|GO:0006811(ion transport)|GO:0008271(secondary active sulfate transmembrane transporter activity)|GO:0008272(sulfate transport)|GO:0009405(pathogenesis)|GO:0015116(sulfate transmembrane transporter activity)|GO:0016020(mem…	"Homo sapiens solute carrier family 26 (anion exchanger), member 2 (SLC26A2), mRNA [NM_000112]"	chr5:149366825-149366884	hs|5q32	GGGGGAGTTGGTTAATAGCAGATACTTTTCTTCTAGAAGCTTATGTTTTATGCTGTTTAT
A_33_P3341821	2.95342	2.95342	1.56239	up	78.3332	148.498	-4.74134	-3.17895	Detected	Detected	0	NM_176782	NM_176782	NM_176782	Hs.234786	338094	FAM151A	"family with sequence similarity 151, member A"	ENST00000302250	THC2473615	GO:0003674(molecular_function)|GO:0008150(biological_process)|GO:0016020(membrane)|GO:0016021(integral to membrane)|GO:0070062(extracellular vesicular exosome)	"Homo sapiens family with sequence similarity 151, member A (FAM151A), mRNA [NM_176782]"	chr1:55075562-55075503	hs|1p32.3	AAACCCCGTGCCCATTGTTCATACTCCAAGTGGCAACATCCTGACGCTGGAGTCCTGCCT
A_21_P0000010	8.49747	8.49747	3.08703	up	27.9665	152.537	-6.22726	-3.14023	Not Detected	Detected	0	NM_001145777	NM_001145777	NM_001145777	Hs.407190	2289	FKBP5	FK506 binding protein 5	ENST00000542713		GO:0000413(protein peptidyl-prolyl isomerization)|GO:0003755(peptidyl-prolyl cis-trans isomerase activity)|GO:0005515(protein binding)|GO:0005528(FK506 binding)|GO:0005654(nucleoplasm)|GO:0005789(endoplasmic reticulum membrane)|GO:0006457(protein folding)|GO:0016020(membrane)|GO:0031072(heat shock protein binding)|GO:0061077(chaperone-mediated protein folding)|GO:0070062(extracellular vesicular e…	"Homo sapiens FK506 binding protein 5 (FKBP5), transcript variant 4, mRNA [NM_001145777]"	chr6:35548734-35548675	hs|6p21.31	CACTTGCCAGAATGTAATATTTGCTGTGAAGTGCTGAAAAGAAAAGTAACTTCCTTTTCA
A_33_P3319542	2.95729	2.95729	1.56427	up	192.381	365.177	-3.44506	-1.88079	Detected	Detected	0	NM_015063	NM_015063	NM_015063	Hs.172884	6543	SLC8A2	"solute carrier family 8 (sodium/calcium exchanger), member 2"	ENST00000236877	THC2515594	GO:0005432(calcium:sodium antiporter activity)|GO:0005516(calmodulin binding)|GO:0005886(plasma membrane)|GO:0006811(ion transport)|GO:0006816(calcium ion transport)|GO:0007154(cell communication)|GO:0007596(blood coagulation)|GO:0016021(integral to membrane)|GO:0035725(sodium ion transmembrane transport)|GO:0055085(transmembrane transport)	"Homo sapiens solute carrier family 8 (sodium/calcium exchanger), member 2 (SLC8A2), mRNA [NM_015063]"	chr19:47931982-47931923	hs|19q13.32	TCGCTGTCTCTTTTCTGTGATTTCTGTAAAAGTTGCCATAAAACTTTGAAATTCTGCCTG
A_32_P117354	2.96197	2.96197	1.56656	up	796.301	1513.93	-1.39572	0.170839	Detected	Detected	0	NM_014988	NM_014988	NM_014988	Hs.335163	22998	LIMCH1	LIM and calponin homology domains 1	ENST00000512946	NP1470826	GO:0003779(actin binding)|GO:0008270(zinc ion binding)|GO:0031032(actomyosin structure organization)	"Homo sapiens LIM and calponin homology domains 1 (LIMCH1), transcript variant 1, mRNA [NM_014988]"	chr4:41700725-41700784	hs|4p13	ATTACATGCTAGATGGGTTCTTTGCATGTGGGTTCCATATAGGTGCAGAAATTTCCTCAG
A_33_P3233906	2.80734	2.80734	1.4892	up	1354.3	2440.38	-0.629551	0.85965	Detected	Detected	0	NM_005855	NM_005855	NM_005855	Hs.471783	10267	RAMP1	receptor (G protein-coupled) activity modifying protein 1	ENST00000254661	THC2464432	GO:0001525(angiogenesis)|GO:0004872(receptor activity)|GO:0004948(calcitonin receptor activity)|GO:0005515(protein binding)|GO:0005615(extracellular space)|GO:0005886(plasma membrane)|GO:0005887(integral to plasma membrane)|GO:0006816(calcium ion transport)|GO:0006886(intracellular protein transport)|GO:0007186(G-protein coupled receptor signaling pathway)|GO:0008277(regulation of G-protein coupl…	"Homo sapiens receptor (G protein-coupled) activity modifying protein 1 (RAMP1), mRNA [NM_005855]"	chr2:238820539-238820598	hs|2q37.3	CTTCCAGCCAAGAAGAGCTCACAGGAGTCCAGAGTAGCCGAGGCTCTGGTATTAACCTGG
A_23_P207456	5.84993	5.84993	2.54842	up	128.978	484.299	-4.02191	-1.47349	Detected	Detected	0	NM_005623	NM_005623	NM_005623	Hs.271387	6355	CCL8	chemokine (C-C motif) ligand 8	ENST00000394620	THC2474860	GO:0004672(protein kinase activity)|GO:0005615(extracellular space)|GO:0006468(protein phosphorylation)|GO:0006816(calcium ion transport)|GO:0006874(cellular calcium ion homeostasis)|GO:0006887(exocytosis)|GO:0006935(chemotaxis)|GO:0006954(inflammatory response)|GO:0006955(immune response)|GO:0007165(signal transduction)|GO:0007267(cell-cell signaling)|GO:0008009(chemokine activity)|GO:0008201(he…	"Homo sapiens chemokine (C-C motif) ligand 8 (CCL8), mRNA [NM_005623]"	chr17:32648102-32648161	hs|17q12	GTTTTAACTCTATCTGTCATACATCCTAGTGAATGTAAAATGCAAAATCCTGGTGATGTG
A_23_P24077	3.05771	3.05771	1.61245	up	838.446	1645.58	-1.32131	0.29114	Detected	Detected	0	NM_022153	NM_022153	NM_022153	Hs.47382	64115	C10orf54	chromosome 10 open reading frame 54	ENST00000394957	THC2494273	"GO:0002725(negative regulation of T cell cytokine production)|GO:0009897(external side of plasma membrane)|GO:0016021(integral to membrane)|GO:0030509(BMP signaling pathway)|GO:0030513(positive regulation of BMP signaling pathway)|GO:0048863(stem cell differentiation)|GO:2000562(negative regulation of CD4-positive, alpha-beta T cell proliferation)|GO:2000738(positive regulation of stem cell diff…	"Homo sapiens chromosome 10 open reading frame 54 (C10orf54), mRNA [NM_022153]"	chr10:73510437-73510378	hs|10q22.1	AGATCTGTCAACAGGTTAAGTCAATCTGGGGCTTCCACTGCCTGCATTCCAGTCCCCAGA
A_33_P3390868	2.97257	2.97257	1.57171	up	176.463	336.693	-3.56966	-1.99795	Detected	Detected	0	NM_133477	NM_133477	NM_133477	Hs.655519	171024	SYNPO2	synaptopodin 2	ENST00000610556	THC2503801	GO:0003779(actin binding)|GO:0005515(protein binding)|GO:0005634(nucleus)|GO:0005925(focal adhesion)|GO:0015629(actin cytoskeleton)|GO:0030018(Z disc)|GO:0051371(muscle alpha-actinin binding)|GO:0071889(14-3-3 protein binding)	"Homo sapiens synaptopodin 2 (SYNPO2), transcript variant 1, mRNA [NM_133477]"	chr4:119982075-119982134	hs|4q26	ACAATTATACACATTGGAAAGGGCCAACCTATTAGGGCTCAAGTATGTATATGCAAAAAA
A_33_P3568504	7.12441	7.12441	2.83277	up	36.6592	167.641	-5.83678	-3.00401	Not Detected	Detected	0	NM_001261424	NM_001261424	NM_001261424	Hs.10941	151242	PPP1R1C	"protein phosphatase 1, regulatory (inhibitor) subunit 1C"	ENST00000409702	NP1186140	GO:0004864(protein phosphatase inhibitor activity)|GO:0004865(protein serine/threonine phosphatase inhibitor activity)|GO:0005737(cytoplasm)|GO:0006469(negative regulation of protein kinase activity)|GO:0007049(cell cycle)|GO:0030307(positive regulation of cell growth)|GO:0035556(intracellular signal transduction)|GO:0051301(cell division)|GO:1900087(positive regulation of G1/S transition of mito…	"Homo sapiens protein phosphatase 1, regulatory (inhibitor) subunit 1C (PPP1R1C), transcript variant 1, mRNA [NM_001261424]"	chr2:182994189-182994248	hs|2q31.3	GATAGTCTACTACCTGCCAACTACTGAATTATGCAGCAGACTTATAAAAATAAAAAGGCT
A_23_P200838	2.97695	2.97695	1.57384	up	123.969	236.881	-4.07906	-2.50522	Detected	Detected	0	NM_003679	NM_003679	NM_003679	Hs.744065	8564	KMO	kynurenine 3-monooxygenase (kynurenine 3-hydroxylase)	ENST00000366559	THC2740108	GO:0004502(kynurenine 3-monooxygenase activity)|GO:0005739(mitochondrion)|GO:0005741(mitochondrial outer membrane)|GO:0005743(mitochondrial inner membrane)|GO:0005829(cytosol)|GO:0006569(tryptophan catabolic process)|GO:0009651(response to salt stress)|GO:0016021(integral to membrane)|GO:0016174(NAD(P)H oxidase activity)|GO:0019441(tryptophan catabolic process to kynurenine)|GO:0019674(NAD metabo…	"Homo sapiens kynurenine 3-monooxygenase (kynurenine 3-hydroxylase) (KMO), mRNA [NM_003679]"	chr1:241758694-241758753	hs|1q43	ATAGGACAGATCCCATCTCCTCCACCCAATACATTATTAGACTGAACTGTGACCTGAAAT
A_23_P19182	2.97857	2.97857	1.57462	up	3419.77	6538.1	0.706794	2.28141	Detected	Detected	0	NM_016606	NM_016606	NM_016606	Hs.416090	51308	REEP2	receptor accessory protein 2	ENST00000378339	THC2651387	GO:0005783(endoplasmic reticulum)|GO:0005789(endoplasmic reticulum membrane)|GO:0005881(cytoplasmic microtubule)|GO:0005887(integral to plasma membrane)|GO:0031883(taste receptor binding)|GO:0032386(regulation of intracellular transport)|GO:0032596(protein transport into membrane raft)|GO:0050913(sensory perception of bitter taste)|GO:0050916(sensory perception of sweet taste)|GO:0070062(extracel…	"Homo sapiens receptor accessory protein 2 (REEP2), transcript variant 2, mRNA [NM_016606]"	chr5:137782577-137782636	hs|5q31.2	CTCCCGGTTCCTTGGGAAGAGGGTGCCCATTGGACCTTTGGCACTGGATGAGCCAATAAA
A_33_P3258141	3.07079	3.07079	1.61861	up	1142.86	2252.63	-0.874453	0.744155	Detected	Detected	0	NM_001278	NM_001278	NM_001278	Hs.198998	1147	CHUK	conserved helix-loop-helix ubiquitous kinase	ENST00000590930	THC2633242	"GO:0002011(morphogenesis of an epithelial sheet)|GO:0002224(toll-like receptor signaling pathway)|GO:0002755(MyD88-dependent toll-like receptor signaling pathway)|GO:0002756(MyD88-independent toll-like receptor signaling pathway)|GO:0003009(skeletal muscle contraction)|GO:0004672(protein kinase activity)|GO:0005515(protein binding)|GO:0005524(ATP binding)|GO:0005654(nucleoplasm)|GO:0005737(cytop…	"Homo sapiens conserved helix-loop-helix ubiquitous kinase (CHUK), mRNA [NM_001278]"	chr10:101948251-101948192	hs|10q24.31	CAGAGAAAGGACTGTGGACCTCTATCATCTGCTAAGTAATTTAGAAGATATTATTTGTCT
A_19_P00811717	9.30101	9.30101	3.21739	up	12.2054	72.8666	-7.42344	-4.20606	Not Detected	Detected	0	ENST00000488386	XM_005250224	XM_005250224	Hs.150120	222256	CDHR3	cadherin-related family member 3	ENST00000488386	NP1190475	GO:0005509(calcium ion binding)|GO:0005886(plasma membrane)|GO:0007156(homophilic cell adhesion)|GO:0016021(integral to membrane)	cadherin-related family member 3 [Source:HGNC Symbol;Acc:HGNC:26308] [ENST00000488386]	chr7:105517644-105517703	hs|7q22.3	ATTCTGCAGTTGTTGCTCTAGGAGCTGAAACCAGTGGGTAGATGTCGTTCTGAAACGCAG
A_33_P3361636	3.6111	3.6111	1.85244	up	1058.01	2452.31	-0.98575	0.866687	Detected	Detected	0	NM_001190839	NM_001190839	NM_001190839	Hs.365706	4256	MGP	matrix Gla protein	ENST00000539261	THC2549798	GO:0001502(cartilage condensation)|GO:0001503(ossification)|GO:0005201(extracellular matrix structural constituent)|GO:0005509(calcium ion binding)|GO:0005515(protein binding)|GO:0005578(proteinaceous extracellular matrix)|GO:0008147(structural constituent of bone)|GO:0030154(cell differentiation)|GO:0030500(regulation of bone mineralization)|GO:0031012(extracellular matrix)|GO:0070062(extracellu…	"Homo sapiens matrix Gla protein (MGP), transcript variant 1, mRNA [NM_001190839]"	chr12:15034886-15034827	hs|12p12.3	GGGTCAAAGGAGAGTCAACATATGTGATTGTTCCATAATAAACTTCTGGTGTGATACTTT
A_33_P3257125	15.5256	15.5256	3.95658	up	12.1475	121.055	-7.4303	-3.47372	Not Detected	Detected	0	NM_178493	NM_178493	NM_178493	Hs.106137	147111	NOTUM	notum pectinacetylesterase homolog (Drosophila)	ENST00000409678	THC2749945	GO:0005576(extracellular region)|GO:0008152(metabolic process)|GO:0016787(hydrolase activity)	"Homo sapiens notum pectinacetylesterase homolog (Drosophila) (NOTUM), mRNA [NM_178493]"	chr17:79910458-79910399	hs|17q25.3	AAATAAGAATATATGATGAATGATATTGTTTTGTAACTTTTTAAAAATGATTTTAAAGAG
A_33_P3304322	10.316	10.316	3.36681	up	12.1357	80.357	-7.4317	-4.06489	Not Detected	Detected	0	ENST00000465922		DB090165	Hs.730437	11055	ZPBP	zona pellucida binding protein	ENST00000465922	THC2778684	GO:0001669(acrosomal vesicle)|GO:0001675(acrosome assembly)|GO:0002199(sperm protein complex)|GO:0005576(extracellular region)|GO:0005634(nucleus)|GO:0007339(binding of sperm to zona pellucida)|GO:0044297(cell body)	zona pellucida binding protein [Source:HGNC Symbol;Acc:HGNC:15662] [ENST00000465922]	chr7:49940774-49940715	hs|7p12.2	AGAAAGGAGACAGCCTTATTTTGTTCCTAATCCTGGTGGGAAAGCTTCAAGTTTCTCAAC
A_24_P299474	2.98192	2.98192	1.57624	up	4457.3	8531.3	1.08907	2.66531	Detected	Detected	0	NM_001122679	NM_001122679	NM_001122679	Hs.631957	57451	TENM2	teneurin transmembrane protein 2	ENST00000545108	THC2612429	"GO:0000122(negative regulation of transcription from RNA polymerase II promoter)|GO:0005102(receptor binding)|GO:0005515(protein binding)|GO:0005634(nucleus)|GO:0005783(endoplasmic reticulum)|GO:0005794(Golgi apparatus)|GO:0005886(plasma membrane)|GO:0005887(integral to plasma membrane)|GO:0005911(cell-cell junction)|GO:0006351(transcription, DNA-dependent)|GO:0007157(heterophilic cell-cell adhe…	"Homo sapiens teneurin transmembrane protein 2 (TENM2), mRNA [NM_001122679]"	chr5:167690063-167690122	hs|5q34	CACACACAATGTTCCAAGTTCCCCTAAAATATGACCCACTTGTTCTGGGTCTACGCAGAA
A_33_P3408624	3.68025	3.68025	1.8798	up	88.8068	209.783	-4.56029	-2.68049	Detected	Detected	0	NM_015232	NM_015232	NM_015232	Hs.536319	440073	IQSEC3	IQ motif and Sec7 domain 3	ENST00000382841	THC2621621	GO:0005086(ARF guanyl-nucleotide exchange factor activity)|GO:0005802(trans-Golgi network)|GO:0016192(vesicle-mediated transport)|GO:0030036(actin cytoskeleton organization)|GO:0030054(cell junction)|GO:0032012(regulation of ARF protein signal transduction)|GO:0043547(positive regulation of GTPase activity)|GO:0045211(postsynaptic membrane)|GO:0060077(inhibitory synapse)	"Homo sapiens IQ motif and Sec7 domain 3 (IQSEC3), transcript variant 2, mRNA [NM_015232]"	chr12:280435-280494	hs|12p13.33	CCCGACTCACCATTTTACCAATTTCAAGAGATACAATTAAAAGTTACTGCTAGCATGGGT
A_33_P3393175	2.98722	2.98722	1.5788	up	239.389	459.007	-3.12967	-1.55087	Detected	Detected	0	NM_014296	NM_014296	NM_014296	Hs.595234	23473	CAPN7	calpain 7	ENST00000253693	THC2461497	GO:0004175(endopeptidase activity)|GO:0004198(calcium-dependent cysteine-type endopeptidase activity)|GO:0005515(protein binding)|GO:0005654(nucleoplasm)|GO:0005737(cytoplasm)|GO:0010634(positive regulation of epithelial cell migration)|GO:0070062(extracellular vesicular exosome)|GO:0097264(self proteolysis)	"Homo sapiens calpain 7 (CAPN7), mRNA [NM_014296]"	chr3:15294322-15294381	hs|3p25.1	GCTTCAAAAGACAGGTTACTGACCATTGAGTGTTTACTATGTACCCAATGTGTATATTTT
A_33_P3221783	6.89895	6.89895	2.78638	up	79.0134	349.889	-4.72886	-1.94249	Detected	Detected	0	NM_033035	NM_033035	NM_033035	Hs.389874	85480	TSLP	thymic stromal lymphopoietin		THC2474858	GO:0005125(cytokine activity)|GO:0005615(extracellular space)	"Homo sapiens thymic stromal lymphopoietin (TSLP), transcript variant 1, mRNA [NM_033035]"	chr5:110413656-110413715	hs|5q22.1	GACTAGTATAGTATACGGTCAGTTATGTCAATGTTTCATGGTCAATAAAAAGGAAGTTGC
A_24_P200219	13.8312	13.8312	3.78986	up	12.5105	111.066	-7.38782	-3.59797	Not Detected	Detected	0	NM_006952	NM_006952	NM_006952	Hs.271580	7348	UPK1B	uroplakin 1B	ENST00000264234	THC2465017	GO:0005198(structural molecule activity)|GO:0016021(integral to membrane)|GO:0016324(apical plasma membrane)|GO:0030855(epithelial cell differentiation)|GO:0070062(extracellular vesicular exosome)	"Homo sapiens uroplakin 1B (UPK1B), mRNA [NM_006952]"	chr3:118923363-118923422	hs|3q13.32	CTTAACAGTGGTTCAAATTTCCTTTCATACCTTGAAGTATGTGTTTAGTAGCCTCAATTC
A_23_P202053	2.99206	2.99206	1.58114	up	120.544	231.507	-4.11947	-2.53833	Detected	Detected	0	NM_002216	NM_002216	NM_002216	Hs.75285	3698	ITIH2	inter-alpha-trypsin inhibitor heavy chain 2	ENST00000613369	THC2467453	GO:0004866(endopeptidase inhibitor activity)|GO:0004867(serine-type endopeptidase inhibitor activity)|GO:0005576(extracellular region)|GO:0010951(negative regulation of endopeptidase activity)|GO:0030212(hyaluronan metabolic process)|GO:0070062(extracellular vesicular exosome)|GO:0072562(blood microparticle)	"Homo sapiens inter-alpha-trypsin inhibitor heavy chain 2 (ITIH2), mRNA [NM_002216]"	chr10:7786219-7786788	hs|10p14	ACACGGCTCAAGTCACGAATCAGAGGGTGCAGATCTCAGTGAAGAAAGAAAAAGTGGTAA
A_33_P3258003	3.74251	3.74251	1.90401	up	50.7138	121.825	-5.36858	-3.46457	Not Detected	Detected	0	NM_152788	NM_152788	NM_152788	Hs.506458	56899	ANKS1B	ankyrin repeat and sterile alpha motif domain containing 1B	ENST00000547010	THC2489791	GO:0005737(cytoplasm)|GO:0014069(postsynaptic density)|GO:0015030(Cajal body)|GO:0030054(cell junction)|GO:0043197(dendritic spine)|GO:0045211(postsynaptic membrane)|GO:0046875(ephrin receptor binding)	"Homo sapiens ankyrin repeat and sterile alpha motif domain containing 1B (ANKS1B), transcript variant 1, mRNA [NM_152788]"	chr12:99129397-99129338	hs|12q23.1	AGCCATACCGGGCAGGAACCATCAGAGAGACACACTGAGGAGGCACTCAGAAAATTTTGA
A_24_P178065	6.24555	6.24555	2.64283	up	175.88	705.075	-3.57444	-0.931608	Detected	Detected	0	BC038806		BC038806	Hs.603252	90102	PHLDB2	"pleckstrin homology-like domain, family B, member 2"		THC2486140	GO:0005515(protein binding)|GO:0005737(cytoplasm)|GO:0005886(plasma membrane)|GO:0045111(intermediate filament cytoskeleton)	"Homo sapiens pleckstrin homology-like domain, family B, member 2, mRNA (cDNA clone IMAGE:5169755), complete cds. [BC038806]"	chr3:111604399-111604458	hs|3q13.2	CTCCTGCTATCCTTCTTCTTCCCATATCACTATTAATAGGCTTGTTTGGCTATCTTGAAG
A_23_P119562	2.99627	2.99627	1.58317	up	294.279	565.963	-2.83184	-1.24868	Detected	Detected	0	NM_001928	NM_001928	NM_001928	Hs.155597	1675	CFD	complement factor D (adipsin)	ENST00000617994	THC2758662	"GO:0002576(platelet degranulation)|GO:0004252(serine-type endopeptidase activity)|GO:0005576(extracellular region)|GO:0005615(extracellular space)|GO:0006508(proteolysis)|GO:0006956(complement activation)|GO:0006957(complement activation, alternative pathway)|GO:0007596(blood coagulation)|GO:0008236(serine-type peptidase activity)|GO:0030168(platelet activation)|GO:0031093(platelet alpha granule…	"Homo sapiens complement factor D (adipsin) (CFD), mRNA [NM_001928]"	chr19:863247-863306	hs|19p13.3	GGCCTGAAGGTCAGGGTCACCCAAGCAACAAAGTCCCGAGCAATGAAGTCATCCACTCCT
A_33_P3420235	3.28742	3.28742	1.71695	up	561.05	1183.87	-1.9009	-0.183949	Detected	Detected	0	ENST00000367534				10092	ARPC5	"actin related protein 2/3 complex, subunit 5, 16kDa"	ENST00000367534	THC2592263	GO:0005200(structural constituent of cytoskeleton)|GO:0005515(protein binding)|GO:0005737(cytoplasm)|GO:0005829(cytosol)|GO:0005885(Arp2/3 protein complex)|GO:0005925(focal adhesion)|GO:0006928(cellular component movement)|GO:0007411(axon guidance)|GO:0015629(actin cytoskeleton)|GO:0030036(actin cytoskeleton organization)|GO:0034314(Arp2/3 complex-mediated actin nucleation)|GO:0038096(Fc-gamma re…	"actin related protein 2/3 complex, subunit 5, 16kDa [Source:HGNC Symbol;Acc:HGNC:708] [ENST00000367534]"	chr1:183592499-183592440	hs|1q25.3	CACAAGCAACATGGGACACAGCATTCACTTTAACATTTCTATTTTCCTTTATCATTTCTG
A_21_P0010964	3.00195	3.00195	1.5859	up	39903	76887.7	4.25132	5.83722	Detected	Detected	0	NM_002952	NM_002952	NM_002952	Hs.356366	6187	RPS2	ribosomal protein S2	ENST00000531065	THC2586486	"GO:0000184(nuclear-transcribed mRNA catabolic process, nonsense-mediated decay)|GO:0003729(mRNA binding)|GO:0003735(structural constituent of ribosome)|GO:0005515(protein binding)|GO:0005634(nucleus)|GO:0005654(nucleoplasm)|GO:0005730(nucleolus)|GO:0005737(cytoplasm)|GO:0005829(cytosol)|GO:0005925(focal adhesion)|GO:0006412(translation)|GO:0006413(translational initiation)|GO:0006414(translation…	"Homo sapiens ribosomal protein S2 (RPS2), mRNA [NM_002952]"	chr16:2012117-2012063	hs|16p13.3	GCTCTAGCTGTGGCTACAACATAGGGTTTTTATACAAGAAAAATAAAGTGAATTAAGCGT
A_24_P355720	32.8386	32.8386	5.03732	up	12.1069	255.192	-7.43513	-2.3978	Not Detected	Detected	0	NM_002007	NM_002007	NM_002007	Hs.1755	2249	FGF4	fibroblast growth factor 4	ENST00000168712	THC2485936	GO:0001502(cartilage condensation)|GO:0001934(positive regulation of protein phosphorylation)|GO:0005104(fibroblast growth factor receptor binding)|GO:0005576(extracellular region)|GO:0005634(nucleus)|GO:0005829(cytosol)|GO:0007165(signal transduction)|GO:0007173(epidermal growth factor receptor signaling pathway)|GO:0007267(cell-cell signaling)|GO:0008083(growth factor activity)|GO:0008201(hepar…	"Homo sapiens fibroblast growth factor 4 (FGF4), mRNA [NM_002007]"	chr11:69588188-69588129	hs|11q13.3	GTCCTACAAGTACCCCGGCATGTTCATCGCCCTGAGCAAGAATGGGAAGACCAAGAAGGG
A_33_P3246293	3.24562	3.24562	1.69849	up	35.9042	74.798	-5.86681	-4.16831	Not Detected	Detected	0	NM_001145207	NM_001145207	NM_001145207	Hs.378532	10767	HBS1L	HBS1-like translational GTPase	ENST00000367822	THC2476947	GO:0003746(translation elongation factor activity)|GO:0003924(GTPase activity)|GO:0005525(GTP binding)|GO:0006412(translation)|GO:0006414(translational elongation)|GO:0007165(signal transduction)|GO:0016020(membrane)|GO:0070062(extracellular vesicular exosome)	"Homo sapiens HBS1-like translational GTPase (HBS1L), transcript variant 3, mRNA [NM_001145207]"	chr6:135359021-135358962	hs|6q23.3	GTTCCAACTCACTGTTTACTCCATAGAAAAAAGAAACTTGACACACGTAAAAGTGAAAAG
A_23_P204630	3.28543	3.28543	1.71608	up	813.722	1716	-1.36449	0.351589	Detected	Detected	0	NM_021229	NM_021229	NM_021229	Hs.201034	59277	NTN4	netrin 4	ENST00000343702	THC2748399	GO:0005604(basement membrane)|GO:0005886(plasma membrane)|GO:0007411(axon guidance)|GO:0016322(neuron remodeling)|GO:0030198(extracellular matrix organization)|GO:0043237(laminin-1 binding)|GO:0060668(regulation of branching involved in salivary gland morphogenesis by extracellular matrix-epithelial cell signaling)	"Homo sapiens netrin 4 (NTN4), mRNA [NM_021229]"	chr12:96052034-96051975	hs|12q22	ATGTAGACATATGCTTGGCTAAAGGGGAAATGGACTTTAAATTTTAAAGAGCTCATTTGC
A_24_P314571	3.19257	3.19257	1.67472	up	616.492	1263.33	-1.76495	-0.0902312	Detected	Detected	0	ENST00000592540		AK075287	Hs.381225	147841	SPC24	"SPC24, NDC80 kinetochore complex component"	ENST00000592540	THC2473723	GO:0000278(mitotic cell cycle)|GO:0000777(condensed chromosome kinetochore)|GO:0005515(protein binding)|GO:0005634(nucleus)|GO:0005730(nucleolus)|GO:0005829(cytosol)|GO:0007067(mitosis)|GO:0031262(Ndc80 complex)|GO:0051301(cell division)	"SPC24, NDC80 kinetochore complex component [Source:HGNC Symbol;Acc:HGNC:26913] [ENST00000592540]"	chr19:11257053-11256994	hs|19p13.2	GGCCTGCAGTTTCACATCTGTGACGGGATGGGACAAATGACACCGTGGTATTCGATGACA
A_23_P329962	3.01384	3.01384	1.5916	up	482.095	932.61	-2.11971	-0.528112	Detected	Detected	0	NM_001030019	NM_001030019	NM_001030019	Hs.406741	256979	SUN3	Sad1 and UNC84 domain containing 3	ENST00000449896	THC2477327	GO:0005635(nuclear envelope)|GO:0006998(nuclear envelope organization)|GO:0016021(integral to membrane)|GO:0034993(SUN-KASH complex)|GO:0090286(cytoskeletal anchoring at nuclear membrane)	"Homo sapiens Sad1 and UNC84 domain containing 3 (SUN3), transcript variant 1, mRNA [NM_001030019]"	chr7:48026942-48026883	hs|7p12.3	AGGCAAGCACATCTAGAAGAGTTGGTACAGAAGGCCATGCCACATGTCCAGAATATTCAA
A_33_P3228564	17.5492	17.5492	4.13334	up	59.8935	674.66	-5.12856	-0.995225	Not Detected	Detected	0	NM_001144875	NM_001144875	NM_001144875	Hs.720849	79930	DOK3	docking protein 3	ENST00000312943	THC2482593	GO:0005158(insulin receptor binding)|GO:0005515(protein binding)|GO:0005737(cytoplasm)|GO:0005886(plasma membrane)|GO:0007265(Ras protein signal transduction)	"Homo sapiens docking protein 3 (DOK3), transcript variant 2, mRNA [NM_001144875]"	chr5:176930223-176930164	hs|5q35.3	ATTCCAGGGGGAGAGAAGTTTCCTGAAGACTTCCATGCTGCGTTCCCTCCTCTGCTCCTG
A_33_P3347397	22.4165	22.4165	4.48649	up	12.1042	174.16	-7.43546	-2.94897	Not Detected	Detected	0	NM_001113490	NM_001113490	NM_001113490	Hs.528051	154796	AMOT	angiomotin	ENST00000371962		GO:0001570(vasculogenesis)|GO:0001701(in utero embryonic development)|GO:0001702(gastrulation with mouth forming second)|GO:0001725(stress fiber)|GO:0001726(ruffle)|GO:0003365(establishment of cell polarity involved in ameboidal cell migration)|GO:0004872(receptor activity)|GO:0005515(protein binding)|GO:0005737(cytoplasm)|GO:0005829(cytosol)|GO:0005884(actin filament)|GO:0005923(tight junction)|…	"Homo sapiens angiomotin (AMOT), transcript variant 1, mRNA [NM_001113490]"	chrX:112021799-112021740	hs|Xq23	TCTAAACGGCCAAATCAAGAGCTGCAGATTATCAGCAAAAATGCTTTTAATCATTTTCCC
A_33_P3351087	3.07832	3.07832	1.62214	up	277.555	548.415	-2.91626	-1.29412	Detected	Detected	0	ENST00000373976				5592	PRKG1	"protein kinase, cGMP-dependent, type I"	ENST00000373976		GO:0001764(neuron migration)|GO:0004692(cGMP-dependent protein kinase activity)|GO:0005246(calcium channel regulator activity)|GO:0005515(protein binding)|GO:0005524(ATP binding)|GO:0005737(cytoplasm)|GO:0005794(Golgi apparatus)|GO:0005829(cytosol)|GO:0005886(plasma membrane)|GO:0006468(protein phosphorylation)|GO:0007165(signal transduction)|GO:0007596(blood coagulation)|GO:0016358(dendrite deve…	"protein kinase, cGMP-dependent, type I [Source:HGNC Symbol;Acc:HGNC:9414] [ENST00000373976]"	chr10:53822566-53822622	hs|10q21.1	TGAATACGTTGTGGAATAAATTCCTTAATTTCTAATAAATCAGTGTTATATTAATTGGAA
A_23_P393051	20.3111	20.3111	4.3442	up	15.8538	206.687	-7.04613	-2.70194	Not Detected	Detected	0	NM_152365	NM_152365	NM_152365	Hs.188881	126695	KDF1	keratinocyte differentiation factor 1	ENST00000616918	NP1276603	GO:0003334(keratinocyte development)|GO:0005737(cytoplasm)|GO:0005938(cell cortex)|GO:0010482(regulation of epidermal cell division)|GO:0010839(negative regulation of keratinocyte proliferation)|GO:0016331(morphogenesis of embryonic epithelium)|GO:0030054(cell junction)|GO:0031252(cell leading edge)|GO:0045606(positive regulation of epidermal cell differentiation)|GO:0048589(developmental growth)…	"Homo sapiens keratinocyte differentiation factor 1 (KDF1), mRNA [NM_152365]"	chr1:27276181-27276122	hs|1p36.11	AGCTTATCTTAAATGTATTGTATTGGGGGGTGGGCAGGGCCCACTCTATGTTATGTTAAG
A_33_P3295200	2.2276	2.2276	1.15549	up	59.1313	84.5478	-5.14704	-3.99155	Not Detected	Detected	0	NM_001523	NM_001523	NM_001523	Hs.57697	3036	HAS1	hyaluronan synthase 1	ENST00000222115	NP1456737	GO:0005886(plasma membrane)|GO:0005887(integral to plasma membrane)|GO:0005975(carbohydrate metabolic process)|GO:0006024(glycosaminoglycan biosynthetic process)|GO:0007155(cell adhesion)|GO:0009405(pathogenesis)|GO:0010764(negative regulation of fibroblast migration)|GO:0030203(glycosaminoglycan metabolic process)|GO:0030212(hyaluronan metabolic process)|GO:0030213(hyaluronan biosynthetic proces…	"Homo sapiens hyaluronan synthase 1 (HAS1), transcript variant 1, mRNA [NM_001523]"	chr19:52220281-52220222	hs|19q13.41	AATGTGGAGCGGGCTTGTCAGAGCTACTTCCACTGTGTATCCTGCATCAGCGGTCCTCTA
A_33_P3354141	6.72909	6.72909	2.75041	up	41.8436	180.731	-5.64595	-2.89554	Not Detected	Detected	0	NM_030885	NM_030885	NM_030885	Hs.517949	4134	MAP4	microtubule-associated protein 4	ENST00000439356	THC2463568	GO:0005198(structural molecule activity)|GO:0005515(protein binding)|GO:0005737(cytoplasm)|GO:0005874(microtubule)|GO:0005875(microtubule associated complex)|GO:0005886(plasma membrane)|GO:0007052(mitotic spindle organization)|GO:0008017(microtubule binding)|GO:0015630(microtubule cytoskeleton)|GO:0051012(microtubule sliding)|GO:0051294(establishment of spindle orientation)|GO:0051301(cell divisi…	"Homo sapiens microtubule-associated protein 4 (MAP4), transcript variant 3, mRNA [NM_030885]"	chr3:48014822-48014763	hs|3p21.31	CAGGGCTGCTTTGTTGAAATGTGATGATTTTCATATGCCTTCTTTCTCTTTCTCTCTCTC
A_33_P3377151	3.5296	3.5296	1.8195	up	51.5703	116.835	-5.34442	-3.52491	Not Detected	Detected	0	NM_006274	NM_006274	NM_006274	Hs.50002	6363	CCL19	chemokine (C-C motif) ligand 19	ENST00000378800	THC2470923	GO:0001768(establishment of T cell polarity)|GO:0001771(immunological synapse formation)|GO:0002407(dendritic cell chemotaxis)|GO:0002408(myeloid dendritic cell chemotaxis)|GO:0002606(positive regulation of dendritic cell antigen processing and presentation)|GO:0005576(extracellular region)|GO:0005615(extracellular space)|GO:0006874(cellular calcium ion homeostasis)|GO:0006954(inflammatory respon…	"Homo sapiens chemokine (C-C motif) ligand 19 (CCL19), mRNA [NM_006274]"	chr9:34690267-34690208	hs|9p13.3	ACATCGTGAGGAACTTCCACTACCTTCTCATCAAGGATGGCTGCAGGGTGCCTGCTGTAG
A_23_P148879	12.1524	12.1524	3.60317	up	12.0844	94.2618	-7.43781	-3.83464	Not Detected	Detected	0	NM_000702	NM_000702	NM_000702	Hs.34114	477	ATP1A2	"ATPase, Na+/K+ transporting, alpha 2 polypeptide"	ENST00000361216	THC2469667	GO:0001504(neurotransmitter uptake)|GO:0002026(regulation of the force of heart contraction)|GO:0002087(regulation of respiratory gaseous exchange by neurological system process)|GO:0005391(sodium:potassium-exchanging ATPase activity)|GO:0005524(ATP binding)|GO:0005737(cytoplasm)|GO:0005768(endosome)|GO:0005886(plasma membrane)|GO:0005890(sodium:potassium-exchanging ATPase complex)|GO:0005901(cav…	"Homo sapiens ATPase, Na+/K+ transporting, alpha 2 polypeptide (ATP1A2), mRNA [NM_000702]"	chr1:160113275-160113334	hs|1q23.2	AGAAACATCTACAGGATCTTTATTGGTGACCTTTTGTAAGACATTAGTTTGAGGTACTAC
A_33_P3391796	3.20779	3.20779	1.68158	up	1079.73	2223.15	-0.956434	0.725147	Detected	Detected	0	NM_005450	NM_005450	NM_005450	Hs.248201	9241	NOG	noggin	ENST00000332822	THC2481541	GO:0000122(negative regulation of transcription from RNA polymerase II promoter)|GO:0001501(skeletal system development)|GO:0001649(osteoblast differentiation)|GO:0001701(in utero embryonic development)|GO:0001706(endoderm formation)|GO:0001707(mesoderm formation)|GO:0001837(epithelial to mesenchymal transition)|GO:0001839(neural plate morphogenesis)|GO:0001843(neural tube closure)|GO:0005515(pro…	"Homo sapiens noggin (NOG), mRNA [NM_005450]"	chr17:54672456-54672515	hs|17q22	GCACTGTTTAACTGTGTAGGAATGTATATGTGTGTGTATATACGGTCCCAGTTTTAATTT
A_33_P3396214	3.0302	3.0302	1.59941	up	96.1072	186.928	-4.44631	-2.8469	Detected	Detected	0	NM_172229	NM_172229	NM_172229	Hs.661128	79412	KREMEN2	kringle containing transmembrane protein 2	ENST00000572045	NP526758	GO:0005886(plasma membrane)|GO:0007154(cell communication)|GO:0016020(membrane)|GO:0016021(integral to membrane)|GO:0016055(Wnt receptor signaling pathway)|GO:0031901(early endosome membrane)|GO:0090090(negative regulation of canonical Wnt receptor signaling pathway)	"Homo sapiens kringle containing transmembrane protein 2 (KREMEN2), transcript variant 4, mRNA [NM_172229]"	chr16:3018321-3018380	hs|16p13.3	CAGGTCAGCAAAAACAGTCAAAAAACCCCCACAGATTTTGAATAAAGGATCTACTTTGGT
A_33_P3272395	3.88298	3.88298	1.95716	up	44.9485	112.028	-5.54269	-3.58552	Not Detected	Detected	0	NM_001008749	NM_001008749	NM_001008749	Hs.583545	401409	RAB19	"RAB19, member RAS oncogene family"	ENST00000356407	THC2626236	GO:0003924(GTPase activity)|GO:0005525(GTP binding)|GO:0005768(endosome)|GO:0005794(Golgi apparatus)|GO:0005886(plasma membrane)|GO:0006184(GTP catabolic process)|GO:0006886(intracellular protein transport)|GO:0019003(GDP binding)|GO:0032482(Rab protein signal transduction)|GO:0070062(extracellular vesicular exosome)	"Homo sapiens RAB19, member RAS oncogene family (RAB19), mRNA [NM_001008749]"	chr7:140107587-140107646	hs|7q34	GAACACGATTGGAGTGGACTTTACCGTGCGTTCCCTTGATATTGACGGCAAAAAAGTGAA
A_23_P259863	24.9997	24.9997	4.64384	up	12.1605	195.134	-7.42876	-2.78492	Not Detected	Detected	0	NM_020406	NM_020406	NM_020406	Hs.232165	57126	CD177	CD177 molecule	ENST00000618265	NP924649	GO:0005886(plasma membrane)|GO:0007596(blood coagulation)|GO:0031225(anchored to membrane)|GO:0050900(leukocyte migration)|GO:0070062(extracellular vesicular exosome)	"Homo sapiens CD177 molecule (CD177), mRNA [NM_020406]"	chr19:43866549-43866608	hs|19q13.31	CTTGGACACCAGATTCTTTCCCATTCTGTCCATGAATCATCTTCCCCACACACAATCATT
A_23_P200222	3.03642	3.03642	1.60237	up	1339.72	2611.11	-0.645166	0.957205	Detected	Detected	0	NM_033300	NM_033300	NM_033300	Hs.280387	7804	LRP8	"low density lipoprotein receptor-related protein 8, apolipoprotein e receptor"	ENST00000306052	THC2470553	"GO:0000122(negative regulation of transcription from RNA polymerase II promoter)|GO:0001523(retinoid metabolic process)|GO:0004888(transmembrane signaling receptor activity)|GO:0005509(calcium ion binding)|GO:0005515(protein binding)|GO:0005576(extracellular region)|GO:0005875(microtubule associated complex)|GO:0005886(plasma membrane)|GO:0005901(caveola)|GO:0006508(proteolysis)|GO:0006629(lipid…	"Homo sapiens low density lipoprotein receptor-related protein 8, apolipoprotein e receptor (LRP8), transcript variant 2, mRNA [NM_033300]"	chr1:53711278-53711219	hs|1p32.3	TATTTATGTTCACACAGGAATTTGGTTTACTGCTTTGTAAATAAAAGGGAAAACTCCGGG
A_33_P3336686	3.70813	3.70813	1.89069	up	6919.68	16469.8	1.7236	3.6143	Detected	Detected	0	NM_004669	NM_004669	NM_004669	Hs.64746	9022	CLIC3	chloride intracellular channel 3		THC2472278	GO:0005244(voltage-gated ion channel activity)|GO:0005254(chloride channel activity)|GO:0005515(protein binding)|GO:0005634(nucleus)|GO:0005737(cytoplasm)|GO:0006821(chloride transport)|GO:0007165(signal transduction)|GO:0034707(chloride channel complex)|GO:0034765(regulation of ion transmembrane transport)|GO:0070062(extracellular vesicular exosome)	"Homo sapiens chloride intracellular channel 3 (CLIC3), mRNA [NM_004669]"	chr9:139889119-139889060	hs|9q34.3	GTCTGTCGCCCAATAAAGGCATCTTTGTCGGGAGTGAGGGTGTCCTGACATCTGAAGGGC
A_24_P323545	3.03675	3.03675	1.60253	up	1062.21	2070.47	-0.980029	0.6225	Detected	Detected	0	NM_001077186	NM_001077186	NM_001077186	Hs.467142	79784	MYH14	"myosin, heavy chain 14, non-muscle"	ENST00000598205	NP861691	GO:0000146(microfilament motor activity)|GO:0001725(stress fiber)|GO:0003009(skeletal muscle contraction)|GO:0005516(calmodulin binding)|GO:0005524(ATP binding)|GO:0005737(cytoplasm)|GO:0006200(ATP catabolic process)|GO:0007411(axon guidance)|GO:0007519(skeletal muscle tissue development)|GO:0007605(sensory perception of sound)|GO:0008360(regulation of cell shape)|GO:0016020(membrane)|GO:0016460(…	"Homo sapiens myosin, heavy chain 14, non-muscle (MYH14), transcript variant 1, mRNA [NM_001077186]"	chr19:50783507-50783566	hs|19q13.33	CCAGGGCGAAATTGGCCTTGGGGTCCCGGGTGCGAGCCATGGAGGCTGAGGCAGCCGGGC
A_32_P4595	2.93116	2.93116	1.55147	up	139.066	261.642	-3.91326	-2.36179	Detected	Detected	0	NM_000337	NM_000337	NM_000337	Hs.387207	6444	SGCD	"sarcoglycan, delta (35kDa dystrophin-associated glycoprotein)"	ENST00000435422	THC2541414	GO:0005737(cytoplasm)|GO:0005856(cytoskeleton)|GO:0005886(plasma membrane)|GO:0007517(muscle organ development)|GO:0016010(dystrophin-associated glycoprotein complex)|GO:0016012(sarcoglycan complex)|GO:0016021(integral to membrane)|GO:0042383(sarcolemma)|GO:0048738(cardiac muscle tissue development)|GO:0055001(muscle cell development)|GO:0060047(heart contraction)|GO:0061024(membrane organization)	"Homo sapiens sarcoglycan, delta (35kDa dystrophin-associated glycoprotein) (SGCD), transcript variant 1, mRNA [NM_000337]"	chr5:156194305-156194364	hs|5q33.3	CAGTCAGGTTTCTCCCTTTTTGAGATTATGAAGAAGCTGAGACATACTTCTTAAGGAGGT
A_23_P35871	3.39837	3.39837	1.76484	up	52.2055	113.876	-5.32676	-3.56192	Not Detected	Detected	0	NM_024680	NM_024680	NM_024680	Hs.523526	79733	E2F8	E2F transcription factor 8	ENST00000620009	THC2621198	"GO:0000122(negative regulation of transcription from RNA polymerase II promoter)|GO:0000978(RNA polymerase II core promoter proximal region sequence-specific DNA binding)|GO:0001047(core promoter binding)|GO:0001078(RNA polymerase II core promoter proximal region sequence-specific DNA binding transcription factor activity involved in negative regulation of transcription)|GO:0001890(placenta deve…	"Homo sapiens E2F transcription factor 8 (E2F8), transcript variant 1, mRNA [NM_024680]"	chr11:19245734-19245675	hs|11p15.1	ATCTGTTGTTGCAGTGTATCTTTTTGTAAAGTTTGCAACAATCCTCAATCAAGTCTATGG
A_33_P3390172	10.5062	10.5062	3.39317	up	12.1147	81.6968	-7.4342	-4.04103	Not Detected	Detected	0	NM_001145271	NM_001145271	NM_001145271	Hs.521459	27299	ADAMDEC1	"ADAM-like, decysin 1"	ENST00000520193	THC2467041	GO:0004222(metalloendopeptidase activity)|GO:0005575(cellular_component)|GO:0005576(extracellular region)|GO:0006508(proteolysis)|GO:0006955(immune response)|GO:0007162(negative regulation of cell adhesion)|GO:0008270(zinc ion binding)	"Homo sapiens ADAM-like, decysin 1 (ADAMDEC1), transcript variant 2, mRNA [NM_001145271]"	chr8:24259534-24259593	hs|8p21.2	ATAATGACAACACCAGTGTGTGGGAACCACCTTCTAGAAGTGGGAGAAGACTGTGATTGT
A_33_P3327277	3.07515	3.07515	1.62066	up	118.058	233.028	-4.14954	-2.52888	Detected	Detected	0	NM_001272046	NM_001272046	NM_001272046	Hs.197741	340706	VWA2	von Willebrand factor A domain containing 2	ENST00000603594	THC2480326	GO:0005604(basement membrane)|GO:0005615(extracellular space)|GO:0007161(calcium-independent cell-matrix adhesion)|GO:0042802(identical protein binding)|GO:0046626(regulation of insulin receptor signaling pathway)|GO:0051260(protein homooligomerization)|GO:0070062(extracellular vesicular exosome)	"Homo sapiens von Willebrand factor A domain containing 2 (VWA2), mRNA [NM_001272046]"	chr10:116049061-116049120	hs|10q25.3	AGAGGATGCAGCCGTTCCTGCCCAGAAGCTGAGGAACAATGGCATCTCTGTCTTGGTCGT
A_23_P168368	3.25576	3.25576	1.70299	up	2103.95	4396.79	0.00600073	1.70899	Detected	Detected	0	NM_025031	NM_025031	NM_025031	Hs.287647	80099	C7orf69	chromosome 7 open reading frame 69	ENST00000623971	THC2648901	GO:0005576(extracellular region)	"Homo sapiens chromosome 7 open reading frame 69 (C7orf69), transcript variant 1, mRNA [NM_025031]"	chr7:47859325-47859384	hs|7p12.3	GAGTGGGTCACAACACTGACAAAGGGGACAATATCCATTAGCCATTATCTTGCTGCGTAT
A_23_P427502	16.0888	-16.0888	-4.00798	down	373.385	14.8964	-2.48837	-6.49635	Detected	Not Detected	0	NM_001206998	NM_001206998	NM_001206998	Hs.732114	84133	ZNRF3	zinc and ring finger 3	ENST00000544604	THC2473242	"GO:0004842(ubiquitin-protein ligase activity)|GO:0005109(frizzled binding)|GO:0005515(protein binding)|GO:0005886(plasma membrane)|GO:0005887(integral to plasma membrane)|GO:0006511(ubiquitin-dependent protein catabolic process)|GO:0008270(zinc ion binding)|GO:0016567(protein ubiquitination)|GO:0016874(ligase activity)|GO:0038018(Wnt receptor catabolic process)|GO:0060070(canonical Wnt receptor …	"Homo sapiens zinc and ring finger 3 (ZNRF3), transcript variant 1, mRNA [NM_001206998]"	chr22:29452861-29452920	hs|22q12.1	ACTGCTCACATACTTATGTGCTGCTAGTCTCTACTCGAAGTTCGTGCAGGACTAATGCTT
A_23_P25566	13.7239	-13.7239	-3.77862	down	426.658	19.9549	-2.29595	-6.07457	Detected	Not Detected	0	NM_004951	NM_004951	NM_004951	Hs.784	1880	GPR183	G protein-coupled receptor 183	ENST00000376414	THC2464037	GO:0002313(mature B cell differentiation involved in immune response)|GO:0004930(G-protein coupled receptor activity)|GO:0005886(plasma membrane)|GO:0005887(integral to plasma membrane)|GO:0006955(immune response)|GO:0006959(humoral immune response)|GO:0007186(G-protein coupled receptor signaling pathway)|GO:0008142(oxysterol binding)|GO:0030890(positive regulation of B cell proliferation)|GO:007…	"Homo sapiens G protein-coupled receptor 183 (GPR183), mRNA [NM_004951]"	chr13:99947433-99947374	hs|13q32.3	CTGAAACGGCAAGTCAGTGTATCGATTTCTAGTGCTGTGAAGTCAGCCCCTGAAGAAAAT
A_33_P3317005	8.66679	-8.66679	-3.1155	down	187.675	13.8994	-3.4808	-6.5963	Detected	Not Detected	0	NM_000578	NM_000578	NM_000578	Hs.591607	6556	SLC11A1	"solute carrier family 11 (proton-coupled divalent metal ion transporter), member 1"	ENST00000483487	THC2566353	"GO:0000060(protein import into nucleus, translocation)|GO:0001818(negative regulation of cytokine production)|GO:0001819(positive regulation of cytokine production)|GO:0002309(T cell proliferation involved in immune response)|GO:0002369(T cell cytokine production)|GO:0002606(positive regulation of dendritic cell antigen processing and presentation)|GO:0002827(positive regulation of T-helper 1 ty…	"Homo sapiens solute carrier family 11 (proton-coupled divalent metal ion transporter), member 1 (SLC11A1), mRNA [NM_000578]"	chr2:219249017-219249076	hs|2q35	ATGAGCATTGCTTTCCTGGACCCAGGAAACATCGAGTCAGATCTTCAGGCTGGCGCCGTG
A_33_P3348156	7.91629	-7.91629	-2.98482	down	171.946	13.9418	-3.60708	-6.5919	Detected	Not Detected	0	ENST00000438067				8643	PTCH2	patched 2	ENST00000438067	THC2725782	GO:0005119(smoothened binding)|GO:0007165(signal transduction)|GO:0008158(hedgehog receptor activity)|GO:0008544(epidermis development)|GO:0016021(integral to membrane)|GO:0042633(hair cycle)|GO:0045879(negative regulation of smoothened signaling pathway)|GO:0097108(hedgehog family protein binding)	patched 2 [Source:HGNC Symbol;Acc:HGNC:9586] [ENST00000438067]	chr1:45287574-45287515	hs|1p34.1	TGGGGAGTTTGCAAGTGAACATTAGCTATTGGAAGGAGCTTCTCTGGTGCCAGGACCTGA
A_23_P167920	6.80016	-6.80016	-2.76557	down	490.375	46.2868	-2.09514	-4.86071	Detected	Not Detected	0	NM_005618	NM_005618	NM_005618	Hs.379912	28514	DLL1	delta-like 1 (Drosophila)	ENST00000616526	THC2470707	GO:0001709(cell fate determination)|GO:0001757(somite specification)|GO:0001947(heart looping)|GO:0005112(Notch binding)|GO:0005509(calcium ion binding)|GO:0005515(protein binding)|GO:0005576(extracellular region)|GO:0005886(plasma membrane)|GO:0005887(integral to plasma membrane)|GO:0007219(Notch signaling pathway)|GO:0007220(Notch receptor processing)|GO:0007267(cell-cell signaling)|GO:0007368(…	"Homo sapiens delta-like 1 (Drosophila) (DLL1), mRNA [NM_005618]"	chr6:170591701-170591642	hs|6q27	ATGGGTGAACTGAATTACGCCTAAGAAGCATGCACTGCCTGAGTGTATATTTTGGATTCT
A_24_P173124	5.57228	-5.57228	-2.47827	down	1642.72	189.225	-0.351012	-2.82928	Detected	Detected	0	NM_144997	NM_144997	NM_144997	Hs.31652	201163	FLCN	folliculin	ENST00000285071	THC2473570	GO:0000122(negative regulation of transcription from RNA polymerase II promoter)|GO:0001701(in utero embryonic development)|GO:0001932(regulation of protein phosphorylation)|GO:0001934(positive regulation of protein phosphorylation)|GO:0005515(protein binding)|GO:0005634(nucleus)|GO:0005737(cytoplasm)|GO:0005886(plasma membrane)|GO:0007043(cell-cell junction assembly)|GO:0010629(negative regulati…	"Homo sapiens folliculin (FLCN), transcript variant 1, mRNA [NM_144997]"	chr17:17116193-17116134	hs|17p11.2	GCTGCTTTCAACATTTACGTTTGGTTACAGTTAACTATTTTCGGAGTGTGGTGATTGAAG
A_21_P0009555	5.30457	-5.30457	-2.40724	down	149.54	18.0948	-3.8085	-6.21574	Detected	Not Detected	0	ENST00000262160				4087	SMAD2	SMAD family member 2	ENST00000262160		"GO:0000122(negative regulation of transcription from RNA polymerase II promoter)|GO:0000790(nuclear chromatin)|GO:0000978(RNA polymerase II core promoter proximal region sequence-specific DNA binding)|GO:0001077(RNA polymerase II core promoter proximal region sequence-specific DNA binding transcription factor activity involved in positive regulation of transcription)|GO:0001657(ureteric bud deve…	SMAD family member 2 [Source:HGNC Symbol;Acc:HGNC:6768] [ENST00000262160]	chr18:45347378-45347319	hs|18q21.1	CTCTTTCAATTTTATTAAGACCAGATCCTTAAAAAGAACCTTGTTCTAACATTGGGGACC
A_33_P3246833	5.27556	-5.27556	-2.39932	down	3773.01	459.057	0.848611	-1.55071	Detected	Detected	0	NM_173843	NM_173843	NM_173843	Hs.81134	3557	IL1RN	interleukin 1 receptor antagonist	ENST00000259206	THC2498493	"GO:0001660(fever generation)|GO:0001960(negative regulation of cytokine-mediated signaling pathway)|GO:0002439(chronic inflammatory response to antigenic stimulus)|GO:0005125(cytokine activity)|GO:0005149(interleukin-1 receptor binding)|GO:0005150(interleukin-1, Type I receptor binding)|GO:0005151(interleukin-1, Type II receptor binding)|GO:0005152(interleukin-1 receptor antagonist activity)|GO:…	"Homo sapiens interleukin 1 receptor antagonist (IL1RN), transcript variant 4, mRNA [NM_173843]"	chr2:113891531-113891590	hs|2q13	TGCAAAGTTCCCTACTTCCTGTGACTTCAGCTCTGTTTTACAATAAAATCTTGAAAATGC
A_23_P379649	5.12959	-5.12959	-2.35884	down	1187	148.53	-0.819787	-3.17863	Detected	Detected	0	NM_001003940	NM_001003940	NM_001003940	Hs.591104	90427	BMF	Bcl2 modifying factor	ENST00000397573	THC2651021	GO:0001669(acrosomal vesicle)|GO:0005515(protein binding)|GO:0005741(mitochondrial outer membrane)|GO:0005829(cytosol)|GO:0005886(plasma membrane)|GO:0006915(apoptotic process)|GO:0016459(myosin complex)|GO:0032464(positive regulation of protein homooligomerization)|GO:0043276(anoikis)|GO:0090200(positive regulation of release of cytochrome c from mitochondria)|GO:0097193(intrinsic apoptotic sign…	"Homo sapiens Bcl2 modifying factor (BMF), transcript variant 1, mRNA [NM_001003940]"	chr15:40380509-40380450	hs|15q15.1	CTGGTGGGGACTTTTGAGTCTTGAGGGGATAGCGGAAAAAGCTGAGCTCATAGGTGCCCA
A_23_P79259	4.73463	-4.73463	-2.24325	down	3354.74	454.8	0.679096	-1.56415	Detected	Detected	0	NM_014521	NM_014521	NM_014521	Hs.516777	23677	SH3BP4	SH3-domain binding protein 4	ENST00000409212	THC2765809	GO:0005092(GDP-dissociation inhibitor activity)|GO:0005515(protein binding)|GO:0005634(nucleus)|GO:0005737(cytoplasm)|GO:0005905(coated pit)|GO:0006897(endocytosis)|GO:0008285(negative regulation of cell proliferation)|GO:0010508(positive regulation of autophagy)|GO:0017016(Ras GTPase binding)|GO:0030136(clathrin-coated vesicle)|GO:0030308(negative regulation of cell growth)|GO:0032007(negative r…	"Homo sapiens SH3-domain binding protein 4 (SH3BP4), mRNA [NM_014521]"	chr2:235963306-235963365	hs|2q37.2	TGCTACGAGGCCATTGTACTGTTTTTTCCTTGAGGTCAAAGCAGTGCTTCCCATAGAGTT
A_23_P75453	2.18058	-2.18058	-1.12471	down	2478.27	729.499	0.242232	-0.882479	Detected	Detected	0	NM_130803	NM_130803	NM_130803	Hs.423348	4221	MEN1	multiple endocrine neoplasia I	ENST00000337652	THC2467176	"GO:0000122(negative regulation of transcription from RNA polymerase II promoter)|GO:0000165(MAPK cascade)|GO:0000400(four-way junction DNA binding)|GO:0000403(Y-form DNA binding)|GO:0000785(chromatin)|GO:0001776(leukocyte homeostasis)|GO:0001933(negative regulation of protein phosphorylation)|GO:0002051(osteoblast fate commitment)|GO:0002076(osteoblast development)|GO:0003682(chromatin binding)|…	"Homo sapiens multiple endocrine neoplasia I (MEN1), transcript variant e1E, mRNA [NM_130803]"	chr11:64571621-64571562	hs|11q13.1	CTGCCCCAGTCGTTAGAATATAGGTCTCTTCTCCCAGAATCCCAGCCGGCCAATGGAAAC
A_23_P135219	4.56344	-4.56344	-2.19012	down	514.9	72.4232	-2.02474	-4.21486	Detected	Detected	0	NM_005294	NM_005294	NM_005294	Hs.722039	2844	GPR21	G protein-coupled receptor 21	ENST00000616002	THC2609687	GO:0004930(G-protein coupled receptor activity)|GO:0005887(integral to plasma membrane)|GO:0007186(G-protein coupled receptor signaling pathway)|GO:0040018(positive regulation of multicellular organism growth)|GO:0042593(glucose homeostasis)|GO:0046627(negative regulation of insulin receptor signaling pathway)	"Homo sapiens G protein-coupled receptor 21 (GPR21), mRNA [NM_005294]"	chr9:125797459-125797518	hs|9q33.2	TTATTGTCTGCTTCACCTATTTCAACATCTTCCGCATCTGCCAACAGCACACAAAGGATA
A_23_P126266	4.52608	-4.52608	-2.17826	down	2833.77	401.874	0.435621	-1.74264	Detected	Detected	0	NM_021958	NM_021958	NM_021958	Hs.74870	3142	HLX	H2.0-like homeobox	ENST00000366903	THC2755767	"GO:0001889(liver development)|GO:0005515(protein binding)|GO:0005634(nucleus)|GO:0006351(transcription, DNA-dependent)|GO:0006355(regulation of transcription, DNA-dependent)|GO:0007275(multicellular organismal development)|GO:0007519(skeletal muscle tissue development)|GO:0008284(positive regulation of cell proliferation)|GO:0030154(cell differentiation)|GO:0043565(sequence-specific DNA binding)…	"Homo sapiens H2.0-like homeobox (HLX), mRNA [NM_021958]"	chr1:221055600-221055659	hs|1q41	AGGCCTGGAGAAAAGGTTTGAGATTCAGAAGTACGTGACCAAGCCGGACCGAAAGCAGCT
A_33_P3342081	4.42386	-4.42386	-2.14531	down	14241.9	2066.4	2.76497	0.619661	Detected	Detected	0	NM_001198	NM_001198	NM_001198	Hs.436023	639	PRDM1	"PR domain containing 1, with ZNF domain"	ENST00000369096	THC2470627	"GO:0000122(negative regulation of transcription from RNA polymerase II promoter)|GO:0000978(RNA polymerase II core promoter proximal region sequence-specific DNA binding)|GO:0001078(RNA polymerase II core promoter proximal region sequence-specific DNA binding transcription factor activity involved in negative regulation of transcription)|GO:0001893(maternal placenta development)|GO:0003700(seque…	"Homo sapiens PR domain containing 1, with ZNF domain (PRDM1), transcript variant 1, mRNA [NM_001198]"	chr6:106557662-106557721	hs|6q21	CCTCTACTCAAAGTTAAAACTGACCAAAGTTACTGGCTTTTTACTTTGCTAGAACAACAA
A_24_P570049	4.40412	-4.40412	-2.13885	down	4908.79	715.422	1.22826	-0.910591	Detected	Detected	0	NM_005036	NM_005036	NM_005036	Hs.103110	5465	PPARA	peroxisome proliferator-activated receptor alpha	ENST00000407236	THC2602549	"GO:0000122(negative regulation of transcription from RNA polymerase II promoter)|GO:0000978(RNA polymerase II core promoter proximal region sequence-specific DNA binding)|GO:0001077(RNA polymerase II core promoter proximal region sequence-specific DNA binding transcription factor activity involved in positive regulation of transcription)|GO:0001078(RNA polymerase II core promoter proximal region…	"Homo sapiens peroxisome proliferator-activated receptor alpha (PPARA), transcript variant 5, mRNA [NM_005036]"	chr22:46639178-46639237	hs|22q13.31	CAGACTCTCCACATGTGCTCTACTAGTGAGTGCCTTATACTCTCAGTATTTTGGGGCTTA
A_23_P82775	4.37087	-4.37087	-2.12792	down	144.069	21.1568	-3.86227	-5.99019	Detected	Not Detected	0	NM_022454	NM_022454	NM_022454	Hs.98367	64321	SOX17	SRY (sex determining region Y)-box 17	ENST00000297316	THC2471882	"GO:0000122(negative regulation of transcription from RNA polymerase II promoter)|GO:0001525(angiogenesis)|GO:0001570(vasculogenesis)|GO:0001706(endoderm formation)|GO:0001828(inner cell mass cellular morphogenesis)|GO:0001947(heart looping)|GO:0003142(cardiogenic plate morphogenesis)|GO:0003143(embryonic heart tube morphogenesis)|GO:0003151(outflow tract morphogenesis)|GO:0003308(negative regula…	"Homo sapiens SRY (sex determining region Y)-box 17 (SOX17), mRNA [NM_022454]"	chr8:55372791-55372850	hs|8q11.23	ACCCTATTTCCAAGTTCAAGTTAACTAGCTTTGAATGTGTCCCAAAACAGCTTCCTCCAT
A_33_P3376965	4.31889	-4.31889	-2.11066	down	345.962	51.4166	-2.59842	-4.70908	Detected	Not Detected	0	NM_024111	NM_024111	NM_024111	Hs.155569	79094	CHAC1	ChaC glutathione-specific gamma-glutamylcyclotransferase 1	ENST00000444189	THC2682685	"GO:0005112(Notch binding)|GO:0005515(protein binding)|GO:0005802(trans-Golgi network)|GO:0005829(cytosol)|GO:0006986(response to unfolded protein)|GO:0007219(Notch signaling pathway)|GO:0008152(metabolic process)|GO:0010955(negative regulation of protein processing)|GO:0016746(transferase activity, transferring acyl groups)|GO:0022008(neurogenesis)|GO:0045746(negative regulation of Notch signali…	"Homo sapiens ChaC glutathione-specific gamma-glutamylcyclotransferase 1 (CHAC1), transcript variant 1, mRNA [NM_024111]"	chr15:41247814-41247873	hs|15q15.1	TTCTCCGGCCACAACCTTGAATACTTGCTGCGTCTGGCAGACTTCATGCAGCTCTGTGGG
A_23_P150064	4.20951	-4.20951	-2.07365	down	90.4908	13.7981	-4.53319	-6.60684	Detected	Not Detected	0	NM_024756	NM_024756	NM_024756	Hs.524479	79812	MMRN2	multimerin 2	ENST00000372027	THC2465974	GO:0001525(angiogenesis)|GO:0005515(protein binding)|GO:0005604(basement membrane)|GO:0005615(extracellular space)|GO:0030948(negative regulation of vascular endothelial growth factor receptor signaling pathway)|GO:0070062(extracellular vesicular exosome)|GO:0090051(negative regulation of cell migration involved in sprouting angiogenesis)	"Homo sapiens multimerin 2 (MMRN2), mRNA [NM_024756]"	chr10:88696220-88696161	hs|10q23.2	AACTCTTCACCACACCCTGTATTCTACAACTTCTTTGGTGTTTTGCTCCTCCTGTGGTTG
A_24_P23522	4.10964	-4.10964	-2.03901	down	450.679	70.39	-2.21693	-4.25594	Detected	Not Detected	0	NM_182529	NM_182529	NM_182529	Hs.707689	168451	THAP5	THAP domain containing 5	ENST00000313516	THC2525079	GO:0002020(protease binding)|GO:0003677(DNA binding)|GO:0005634(nucleus)|GO:0005654(nucleoplasm)|GO:0007049(cell cycle)|GO:0045786(negative regulation of cell cycle)|GO:0046872(metal ion binding)	"Homo sapiens THAP domain containing 5 (THAP5), transcript variant 2, mRNA [NM_182529]"	chr7:108204772-108204713	hs|7q31.1	AAAGAGCAACAAACTCTAGGTAGATTGAAGTCTTTGGAAGCTCTTATAAGGCAGCTAAAG
A_23_P29830	4.04428	-4.04428	-2.01588	down	1004.57	159.436	-1.06053	-3.07641	Detected	Detected	0	NM_170662	NM_170662	NM_170662	Hs.430589	868	CBLB	"Cbl proto-oncogene B, E3 ubiquitin protein ligase"	ENST00000405772	NP091053	GO:0001784(phosphotyrosine binding)|GO:0002669(positive regulation of T cell anergy)|GO:0004842(ubiquitin-protein ligase activity)|GO:0004871(signal transducer activity)|GO:0005509(calcium ion binding)|GO:0005515(protein binding)|GO:0005654(nucleoplasm)|GO:0005737(cytoplasm)|GO:0005829(cytosol)|GO:0005886(plasma membrane)|GO:0006607(NLS-bearing substrate import into nucleus)|GO:0006955(immune res…	"Homo sapiens Cbl proto-oncogene B, E3 ubiquitin protein ligase (CBLB), mRNA [NM_170662]"	chr3:105400640-105400581	hs|3q13.11	ATGCTGAATGGAACACATGGTCCATCTTCAGAGAAGAAATCAAACATCCCTGACTTAAGC
A_23_P55926	4.04342	-4.04342	-2.01558	down	783.173	124.324	-1.4197	-3.43528	Detected	Detected	0	NM_007121	NM_007121	NM_007121	Hs.432976	7376	NR1H2	"nuclear receptor subfamily 1, group H, member 2"	ENST00000597085	THC2551631	"GO:0000122(negative regulation of transcription from RNA polymerase II promoter)|GO:0000978(RNA polymerase II core promoter proximal region sequence-specific DNA binding)|GO:0001077(RNA polymerase II core promoter proximal region sequence-specific DNA binding transcription factor activity involved in positive regulation of transcription)|GO:0001133(sequence-specific transcription regulatory regi…	"Homo sapiens nuclear receptor subfamily 1, group H, member 2 (NR1H2), transcript variant 1, mRNA [NM_007121]"	chr19:50882329-50882388	hs|19q13.33	TGGCCATCATCTCAGTCCAGGAGATCGTGGACTTCGCTAAGCAAGTGCCTGGTTTCCTGC
A_33_P3386453	2.52882	-2.52882	-1.33846	down	1084.2	275.195	-0.95047	-2.28893	Detected	Detected	0	NM_001030055	NM_001030055	NM_001030055	Hs.592313	394	ARHGAP5	Rho GTPase activating protein 5	ENST00000407916	THC2690895	GO:0002053(positive regulation of mesenchymal cell proliferation)|GO:0003924(GTPase activity)|GO:0005100(Rho GTPase activator activity)|GO:0005515(protein binding)|GO:0005525(GTP binding)|GO:0005737(cytoplasm)|GO:0005829(cytosol)|GO:0007155(cell adhesion)|GO:0007264(small GTPase mediated signal transduction)|GO:0007266(Rho protein signal transduction)|GO:0008152(metabolic process)|GO:0008361(regu…	"Homo sapiens Rho GTPase activating protein 5 (ARHGAP5), transcript variant 1, mRNA [NM_001030055]"	chr14:32623889-32623948	hs|14q12	CAACCTTGATGAGAGCTGATTTTGAAAATCAAGAGTTTCTGTCTACTACTAAGATTCATC
A_33_P3347911	3.98263	-3.98263	-1.99372	down	98.0126	15.7965	-4.41799	-6.41171	Detected	Not Detected	0	NM_001271877	NM_001271877	NM_001271877	Hs.660607	2100	ESR2	estrogen receptor 2 (ER beta)	ENST00000344288	NP083886	"GO:0000122(negative regulation of transcription from RNA polymerase II promoter)|GO:0001046(core promoter sequence-specific DNA binding)|GO:0001541(ovarian follicle development)|GO:0001764(neuron migration)|GO:0003677(DNA binding)|GO:0003700(sequence-specific DNA binding transcription factor activity)|GO:0003707(steroid hormone receptor activity)|GO:0003713(transcription coactivator activity)|GO…	"Homo sapiens estrogen receptor 2 (ER beta) (ESR2), transcript variant g, mRNA [NM_001271877]"	chr14:64735617-64735558	hs|14q23.2	ATATTTGTCCAGCTACAAATCAGTGTACAATCGATAAAAACCGGCGCAAGAGCTGCCAGG
A_23_P75516	3.90633	-3.90633	-1.96581	down	4529.09	744.199	1.11212	-0.853696	Detected	Detected	0	NM_003626	NM_003626	NM_003626	Hs.530749	8500	PPFIA1	"protein tyrosine phosphatase, receptor type, f polypeptide (PTPRF), interacting protein (liprin), alpha 1"	ENST00000532504	THC2610455	GO:0004871(signal transducer activity)|GO:0005515(protein binding)|GO:0005737(cytoplasm)|GO:0005829(cytosol)|GO:0005925(focal adhesion)|GO:0007160(cell-matrix adhesion)|GO:0007165(signal transduction)|GO:0007268(synaptic transmission)|GO:0007269(neurotransmitter secretion)|GO:0014047(glutamate secretion)|GO:0048786(presynaptic active zone)|GO:0051497(negative regulation of stress fiber assembly)|…	"Homo sapiens protein tyrosine phosphatase, receptor type, f polypeptide (PTPRF), interacting protein (liprin), alpha 1 (PPFIA1), transcript variant 2, mRNA [NM_003626]"	chr11:70229626-70229685	hs|11q13.3	TCAAGCAATTGTTGTATTTTCATGACTGACCTTAACTGTACTTTTTCTAGCAAGAGATGC
A_33_P3300893	3.90214	-3.90214	-1.96427	down	454.633	74.7835	-2.20433	-4.16859	Detected	Not Detected	0	NM_130475	NM_130475	NM_130475	Hs.82548	8567	MADD	MAP-kinase activating death domain	ENST00000395344	THC2685712	GO:0000187(activation of MAPK activity)|GO:0005123(death receptor binding)|GO:0005515(protein binding)|GO:0005737(cytoplasm)|GO:0005886(plasma membrane)|GO:0007166(cell surface receptor signaling pathway)|GO:0016021(integral to membrane)|GO:0017112(Rab guanyl-nucleotide exchange factor activity)|GO:0030295(protein kinase activator activity)|GO:0032483(regulation of Rab protein signal transduction…	"Homo sapiens MAP-kinase activating death domain (MADD), transcript variant 7, mRNA [NM_130475]"	chr11:47345326-47345385	hs|11p11.2	GTTGTGCTTGTGGCGTAGAAATGGCTCTGAGACCCAGCTCAACAAGTTCTATACTAAAAA
A_21_P0011967	3.89594	-3.89594	-1.96197	down	191.609	31.5683	-3.45087	-5.41284	Detected	Not Detected	0	NM_003014	NM_003014		Hs.658169	6424	SFRP4	secreted frizzled-related protein 4	ENST00000436072	THC2467117	GO:0002092(positive regulation of receptor internalization)|GO:0004930(G-protein coupled receptor activity)|GO:0005515(protein binding)|GO:0005615(extracellular space)|GO:0005634(nucleus)|GO:0005737(cytoplasm)|GO:0007275(multicellular organismal development)|GO:0008285(negative regulation of cell proliferation)|GO:0009725(response to hormone stimulus)|GO:0009986(cell surface)|GO:0010628(positive …	"Homo sapiens secreted frizzled-related protein 4 (SFRP4), mRNA [NM_003014]"	chr7:37945565-37945534	hs|7p14.1	GCAGAAGGATTTTTGTGATGAGAGGGGATTTTTGAAAAATCTAGAGAAGTAGCATATGGA
A_23_P212258	3.88084	-3.88084	-1.95637	down	194.014	32.089	-3.43287	-5.38924	Detected	Not Detected	0	NM_000893	NM_000893	NM_000893	Hs.77741	3827	KNG1	kininogen 1	ENST00000447445	THC2461956	"GO:0002576(platelet degranulation)|GO:0004869(cysteine-type endopeptidase inhibitor activity)|GO:0005102(receptor binding)|GO:0005515(protein binding)|GO:0005576(extracellular region)|GO:0005615(extracellular space)|GO:0005886(plasma membrane)|GO:0006939(smooth muscle contraction)|GO:0006954(inflammatory response)|GO:0007162(negative regulation of cell adhesion)|GO:0007204(elevation of cytosolic…	"Homo sapiens kininogen 1 (KNG1), transcript variant 2, mRNA [NM_000893]"	chr3:186457190-186459356	hs|3q27.3	AACCACTGGGAATGATCTCACTGATGAAAAGGCCTCCAGGTTTTTCACCTTTCCGATCAT
A_23_P121695	3.8728	-3.8728	-1.95338	down	89.7084	14.8681	-4.54572	-6.49909	Detected	Not Detected	0	NM_006419	NM_006419	NM_006419	Hs.100431	10563	CXCL13	chemokine (C-X-C motif) ligand 13	ENST00000286758	THC2465087	GO:0002467(germinal center formation)|GO:0002518(lymphocyte chemotaxis across high endothelial venule)|GO:0002544(chronic inflammatory response)|GO:0002920(regulation of humoral immune response)|GO:0005576(extracellular region)|GO:0005615(extracellular space)|GO:0006954(inflammatory response)|GO:0006955(immune response)|GO:0007166(cell surface receptor signaling pathway)|GO:0007186(G-protein coup…	"Homo sapiens chemokine (C-X-C motif) ligand 13 (CXCL13), mRNA [NM_006419]"	chr4:78532646-78532705	hs|4q21.1	CAAGAGGCAAAGGAATCCATGTAGTAGATATCCTCTGCTTAAAAACTCACTACGGAGGAG
A_23_P347432	3.62671	-3.62671	-1.85866	down	282.988	50.0844	-2.88829	-4.74695	Detected	Not Detected	0	NM_004421	NM_004421	NM_004421	Hs.731450	1855	DVL1	dishevelled segment polarity protein 1	ENST00000610709	THC2757328	"GO:0001505(regulation of neurotransmitter levels)|GO:0003674(molecular_function)|GO:0005109(frizzled binding)|GO:0005515(protein binding)|GO:0005737(cytoplasm)|GO:0005829(cytosol)|GO:0005874(microtubule)|GO:0006366(transcription from RNA polymerase II promoter)|GO:0006469(negative regulation of protein kinase activity)|GO:0007269(neurotransmitter secretion)|GO:0007411(axon guidance)|GO:0007507(h…	"Homo sapiens dishevelled segment polarity protein 1 (DVL1), mRNA [NM_004421]"	chr1:1271579-1271520	hs|1p36.33	CCAGTCCTTCCAGAAGGCTATGGGGAACCCCTGCGAGTTCTTCGTGGACATCATGTGACT
A_33_P3288384	3.61316	-3.61316	-1.85326	down	208.119	36.972	-3.33162	-5.18488	Detected	Not Detected	0	NM_001143937	NM_001143937	NM_001143937	Hs.102798	5682	PSMA1	"proteasome (prosome, macropain) subunit, alpha type, 1"	ENST00000529524	THC2518837	"GO:0000082(G1/S transition of mitotic cell cycle)|GO:0000209(protein polyubiquitination)|GO:0000278(mitotic cell cycle)|GO:0000502(proteasome complex)|GO:0002474(antigen processing and presentation of peptide antigen via MHC class I)|GO:0002479(antigen processing and presentation of exogenous peptide antigen via MHC class I, TAP-dependent)|GO:0003723(RNA binding)|GO:0004298(threonine-type endope…	"Homo sapiens proteasome (prosome, macropain) subunit, alpha type, 1 (PSMA1), transcript variant 3, mRNA [NM_001143937]"	chr11:14535571-14535512	hs|11p15.2	GTGTCCTATTGCATTATTTCTCTGGTGGATTATGCAACAATTAAAGAATAAGCCAGAGAC
A_33_P3409099	3.58492	-3.58492	-1.84194	down	1781.56	318.984	-0.233961	-2.0759	Detected	Detected	0	NM_000332	NM_000332	NM_000332	Hs.434961	6310	ATXN1	ataxin 1	ENST00000244769	THC2613205	"GO:0000122(negative regulation of transcription from RNA polymerase II promoter)|GO:0003677(DNA binding)|GO:0003682(chromatin binding)|GO:0005515(protein binding)|GO:0005634(nucleus)|GO:0005654(nucleoplasm)|GO:0005737(cytoplasm)|GO:0006351(transcription, DNA-dependent)|GO:0006396(RNA processing)|GO:0008022(protein C-terminus binding)|GO:0008266(poly(U) RNA binding)|GO:0008344(adult locomotory be…	"Homo sapiens ataxin 1 (ATXN1), transcript variant 1, mRNA [NM_000332]"	chr6:16302089-16302030	hs|6p22.3	TTTGAAGACACTAATACCGTGCTATTTCAGATATGGGTGAGGAAGCAGAGCTCTCGGTAC
A_23_P310086	3.46071	-3.46071	-1.79107	down	275.479	51.0941	-2.92709	-4.71816	Detected	Not Detected	0	NM_152731	NM_152731	NM_152731	Hs.582993	221336	BEND6	BEN domain containing 6	ENST00000370746	THC2475636	GO:0000122(negative regulation of transcription from RNA polymerase II promoter)|GO:0001106(RNA polymerase II transcription corepressor activity)|GO:0003682(chromatin binding)|GO:0005634(nucleus)|GO:0045666(positive regulation of neuron differentiation)|GO:0045746(negative regulation of Notch signaling pathway)	"Homo sapiens BEN domain containing 6 (BEND6), mRNA [NM_152731]"	chr6:56891269-56891328	hs|6p12.1	CATTGATTATTACCAGTGACTTCCCATTATAGTTTTTGGATCTTTAGCATAAGCACATGC
A_33_P3312212	3.31337	-3.31337	-1.7283	down	1232.15	238.695	-0.765921	-2.49422	Detected	Detected	0	NM_206907	NM_206907	NM_206907	Hs.43322	5562	PRKAA1	"protein kinase, AMP-activated, alpha 1 catalytic subunit"	ENST00000506652	NP387862	"GO:0000187(activation of MAPK activity)|GO:0001666(response to hypoxia)|GO:0003682(chromatin binding)|GO:0004672(protein kinase activity)|GO:0004679(AMP-activated protein kinase activity)|GO:0004691(cAMP-dependent protein kinase activity)|GO:0005515(protein binding)|GO:0005524(ATP binding)|GO:0005622(intracellular)|GO:0005634(nucleus)|GO:0005654(nucleoplasm)|GO:0005737(cytoplasm)|GO:0005829(cyto…	"Homo sapiens protein kinase, AMP-activated, alpha 1 catalytic subunit (PRKAA1), transcript variant 2, mRNA [NM_206907]"	chr5:40769578-40769519	hs|5p13.1	AATTTTTAAGAACAAGTTGTGGCTCACCCAACTATGCTGCACCAGAAGTAATTTCAGGAA
A_24_P252497	3.30995	-3.30995	-1.72681	down	12635.5	2450.31	2.59231	0.865505	Detected	Detected	0	NM_025195	NM_025195	NM_025195	Hs.444947	10221	TRIB1	tribbles pseudokinase 1	ENST00000311922	THC2466660	GO:0004672(protein kinase activity)|GO:0004860(protein kinase inhibitor activity)|GO:0005524(ATP binding)|GO:0005634(nucleus)|GO:0005737(cytoplasm)|GO:0006468(protein phosphorylation)|GO:0006469(negative regulation of protein kinase activity)|GO:0007254(JNK cascade)|GO:0008134(transcription factor binding)|GO:0014912(negative regulation of smooth muscle cell migration)|GO:0031434(mitogen-activate…	"Homo sapiens tribbles pseudokinase 1 (TRIB1), transcript variant 1, mRNA [NM_025195]"	chr8:126450454-126450513	hs|8q24.13	ACTAACGCTCTCGTGGTTGCTCGACTGTTGTATCTGTGATACATTATCCGACTAAGGACT
A_33_P3396139	3.29831	-3.29831	-1.72173	down	70.7797	13.7742	-4.88762	-6.60935	Detected	Not Detected	0	NM_005214	NM_005214	NM_005214	Hs.247824	1493	CTLA4	cytotoxic T-lymphocyte-associated protein 4	ENST00000302823	THC2476969	GO:0005515(protein binding)|GO:0005794(Golgi apparatus)|GO:0005886(plasma membrane)|GO:0005887(integral to plasma membrane)|GO:0006955(immune response)|GO:0006974(response to DNA damage stimulus)|GO:0009897(external side of plasma membrane)|GO:0030889(negative regulation of B cell proliferation)|GO:0031295(T cell costimulation)|GO:0042130(negative regulation of T cell proliferation)|GO:0043065(po…	"Homo sapiens cytotoxic T-lymphocyte-associated protein 4 (CTLA4), transcript variant 1, mRNA [NM_005214]"	chr2:204738564-204738623	hs|2q33.2	GGGGTGCATGAAGGTTTCTGAAAATTAACACTGCTTGTGTTTTTAACTCAATATTTTCCA
A_23_P1343	3.29403	-3.29403	-1.71985	down	983.216	191.588	-1.09152	-2.81137	Detected	Detected	0	NM_003473	NM_003473	NM_003473	Hs.335391	8027	STAM	signal transducing adaptor molecule (SH3 domain and ITAM motif) 1	ENST00000377524	NP841338	GO:0005070(SH3/SH2 adaptor activity)|GO:0005515(protein binding)|GO:0005829(cytosol)|GO:0006886(intracellular protein transport)|GO:0007165(signal transduction)|GO:0007173(epidermal growth factor receptor signaling pathway)|GO:0009967(positive regulation of signal transduction)|GO:0016197(endosomal transport)|GO:0031901(early endosome membrane)|GO:0042059(negative regulation of epidermal growth f…	"Homo sapiens signal transducing adaptor molecule (SH3 domain and ITAM motif) 1 (STAM), transcript variant 1, mRNA [NM_003473]"	chr10:17757003-17757062	hs|10p12.33	ATTCCTTTCATAATATGAAAGAATTGATACAAGGCTATTTGTCTCGTAAACCTGGTCTGC
A_33_P3322274	3.26821	-3.26821	-1.7085	down	1302.25	255.76	-0.686094	-2.3946	Detected	Detected	0	NM_001066	NM_001066	NM_001066	Hs.256278	7133	TNFRSF1B	"tumor necrosis factor receptor superfamily, member 1B"	ENST00000489921	NP861697	"GO:0005031(tumor necrosis factor-activated receptor activity)|GO:0005515(protein binding)|GO:0005576(extracellular region)|GO:0005634(nucleus)|GO:0005886(plasma membrane)|GO:0006954(inflammatory response)|GO:0006955(immune response)|GO:0007568(aging)|GO:0008630(DNA damage response, signal transduction resulting in induction of apoptosis)|GO:0016021(integral to membrane)|GO:0031625(ubiquitin prot…	"Homo sapiens tumor necrosis factor receptor superfamily, member 1B (TNFRSF1B), mRNA [NM_001066]"	chr1:12252992-12253051	hs|1p36.22	TATGGCCCCAGGGGCAGTACACTTACCCCAGCCAGTGTCCACACGATCCCAACACACGCA
A_33_P3236642	3.25714	-3.25714	-1.7036	down	307.603	60.618	-2.76796	-4.47157	Detected	Not Detected	0	NM_198551	NM_198551	NM_198551	Hs.118474	375056	MIA3	"melanoma inhibitory activity family, member 3"	ENST00000470521	THC2471856	GO:0002063(chondrocyte development)|GO:0002687(positive regulation of leukocyte migration)|GO:0005515(protein binding)|GO:0005789(endoplasmic reticulum membrane)|GO:0006887(exocytosis)|GO:0007162(negative regulation of cell adhesion)|GO:0015031(protein transport)|GO:0016020(membrane)|GO:0016021(integral to membrane)|GO:0030199(collagen fibril organization)|GO:0030336(negative regulation of cell m…	"Homo sapiens melanoma inhibitory activity family, member 3 (MIA3), transcript variant 1, mRNA [NM_198551]"	chr1:222801854-222801913	hs|1q41	CAACAGATTATAGTGACCCTGACAATGTAGATGATGGTCTTTTTATTGTAGACATTCCTA
A_23_P69791	3.25333	-3.25333	-1.70192	down	3153.25	622.126	0.589738	-1.11218	Detected	Detected	0	NM_018569	NM_018569	NM_018569	Hs.435991	55435	AP1AR	adaptor-related protein complex 1 associated regulatory protein	ENST00000309703	THC2485248	"GO:0001920(negative regulation of receptor recycling)|GO:0005769(early endosome)|GO:0005770(late endosome)|GO:0005794(Golgi apparatus)|GO:0015031(protein transport)|GO:0019894(kinesin binding)|GO:0030133(transport vesicle)|GO:0034315(regulation of Arp2/3 complex-mediated actin nucleation)|GO:0034613(cellular protein localization)|GO:0035650(AP-1 adaptor complex binding)|GO:0048203(vesicle target…	"Homo sapiens adaptor-related protein complex 1 associated regulatory protein (AP1AR), transcript variant 1, mRNA [NM_018569]"	chr4:113190479-113190538	hs|4q25	GGCTCCATTGATTTTATTAAGCCTTCCTTTACCTTGTAGTACAAGGTGCTTTAATGGGAT
A_23_P29005	3.23319	-3.23319	-1.69296	down	121.969	24.2141	-4.10251	-5.79547	Detected	Not Detected	0	NM_022136	NM_022136	NM_022136	Hs.473341	64092	SAMSN1	"SAM domain, SH3 domain and nuclear localization signals 1"	ENST00000619120	NP495159	GO:0001726(ruffle)|GO:0001784(phosphotyrosine binding)|GO:0002820(negative regulation of adaptive immune response)|GO:0005634(nucleus)|GO:0005829(cytosol)|GO:0050732(negative regulation of peptidyl-tyrosine phosphorylation)|GO:0050869(negative regulation of B cell activation)	"Homo sapiens SAM domain, SH3 domain and nuclear localization signals 1 (SAMSN1), transcript variant 1, mRNA [NM_022136]"	chr21:15858344-15858285	hs|21q11.2	CTCTGGTTGCTATATCTCATCAGGAAATTCAGATAATGGCAAAGAGGATCTGGAGTCTGA
A_23_P210886	3.22092	-3.22092	-1.68747	down	229.825	45.7999	-3.1885	-4.87597	Detected	Not Detected	0	NM_138578	NM_138578	NM_138578	Hs.516966	598	BCL2L1	BCL2-like 1	ENST00000307677	THC2507989	"GO:0000910(cytokinesis)|GO:0001541(ovarian follicle development)|GO:0001701(in utero embryonic development)|GO:0001836(release of cytochrome c from mitochondria)|GO:0005515(protein binding)|GO:0005634(nucleus)|GO:0005730(nucleolus)|GO:0005737(cytoplasm)|GO:0005739(mitochondrion)|GO:0005741(mitochondrial outer membrane)|GO:0005743(mitochondrial inner membrane)|GO:0005759(mitochondrial matrix)|GO:…	"Homo sapiens BCL2-like 1 (BCL2L1), transcript variant 1, mRNA [NM_138578]"	chr20:30253383-30253324	hs|20q11.21	GAACCTCTTCCCCAGAAAGGAGACTAGATTGCCTTTGTTTTGATGTTTGTGGCCTCAGAA
A_24_P45476	3.13105	-3.13105	-1.64665	down	133.37	27.341	-3.9736	-5.62025	Detected	Not Detected	0	NM_002995	NM_002995	NM_002995	Hs.546295	6375	XCL1	chemokine (C motif) ligand 1	ENST00000367818	THC2476442	"GO:0001916(positive regulation of T cell mediated cytotoxicity)|GO:0002690(positive regulation of leukocyte chemotaxis)|GO:0002725(negative regulation of T cell cytokine production)|GO:0002726(positive regulation of T cell cytokine production)|GO:0002826(negative regulation of T-helper 1 type immune response)|GO:0005576(extracellular region)|GO:0005615(extracellular space)|GO:0006955(immune resp…	"Homo sapiens chemokine (C motif) ligand 1 (XCL1), mRNA [NM_002995]"	chr1:168550524-168550583	hs|1q24.2	AGTTTATACTCACCTTTTATGAAAGCACTGCATGAATAAAATTATTCCTTTGTATTTTTA
A_23_P148015	3.13083	-3.13083	-1.64654	down	140.632	28.8318	-3.89711	-5.54365	Detected	Not Detected	0	NM_004655	NM_004655	NM_004655	Hs.156527	8313	AXIN2	axin 2	ENST00000618960	THC2461858	GO:0001934(positive regulation of protein phosphorylation)|GO:0001957(intramembranous ossification)|GO:0003139(secondary heart field specification)|GO:0003413(chondrocyte differentiation involved in endochondral bone morphogenesis)|GO:0005096(GTPase activator activity)|GO:0005515(protein binding)|GO:0005634(nucleus)|GO:0005654(nucleoplasm)|GO:0005737(cytoplasm)|GO:0005794(Golgi apparatus)|GO:0005…	"Homo sapiens axin 2 (AXIN2), mRNA [NM_004655]"	chr17:63525448-63525389	hs|17q24.1	TTTTGTCTTAAAGGTCTTGAGGGTTGACCATGTTGCGTCATCATCAACATTTTGGGGGTT
A_23_P1374	3.12261	-3.12261	-1.64275	down	78.6025	16.1572	-4.73638	-6.37914	Detected	Not Detected	0	NM_006257	NM_006257	NM_006257	Hs.498570	5588	PRKCQ	"protein kinase C, theta"	ENST00000263125	THC2471720	"GO:0001558(regulation of cell growth)|GO:0001772(immunological synapse)|GO:0004674(protein serine/threonine kinase activity)|GO:0004697(protein kinase C activity)|GO:0004842(ubiquitin-protein ligase activity)|GO:0005515(protein binding)|GO:0005524(ATP binding)|GO:0005829(cytosol)|GO:0005886(plasma membrane)|GO:0006355(regulation of transcription, DNA-dependent)|GO:0006468(protein phosphorylation…	"Homo sapiens protein kinase C, theta (PRKCQ), transcript variant 1, mRNA [NM_006257]"	chr10:6470247-6470188	hs|10p15.1	ACTGATCAACAGCATGGACCAGAATATGTTCAGGAACTTTTCCTTCATGAACCCCGGGAT
A_24_P830690	3.11128	-3.11128	-1.63751	down	1853.2	382.324	-0.177081	-1.81459	Detected	Detected	0	NM_002613	NM_002613	NM_002613	Hs.459691	5170	PDPK1	3-phosphoinositide dependent protein kinase 1	ENST00000562415	NP1472903	"GO:0003323(type B pancreatic cell development)|GO:0004674(protein serine/threonine kinase activity)|GO:0004676(3-phosphoinositide-dependent protein kinase activity)|GO:0005158(insulin receptor binding)|GO:0005515(protein binding)|GO:0005524(ATP binding)|GO:0005654(nucleoplasm)|GO:0005737(cytoplasm)|GO:0005829(cytosol)|GO:0005886(plasma membrane)|GO:0005925(focal adhesion)|GO:0006351(transcriptio…	"Homo sapiens 3-phosphoinositide dependent protein kinase 1 (PDPK1), transcript variant 1, mRNA [NM_002613]"	chr16:2631645-2631704	hs|16p13.3	GAATATGACTTTCCAGAAAAATTCTTCCCTAAGGCAAGAGACCTCGTGGAGAAACTTTTG
A_33_P3302861	3.02492	-3.02492	-1.5969	down	97.7746	20.7472	-4.4215	-6.0184	Detected	Not Detected	0	NM_015272	NM_015272	NM_015272	Hs.298382	23322	RPGRIP1L	RPGRIP1-like	ENST00000621565	THC2645625	GO:0001701(in utero embryonic development)|GO:0001736(establishment of planar polarity)|GO:0001822(kidney development)|GO:0001889(liver development)|GO:0005515(protein binding)|GO:0005737(cytoplasm)|GO:0005813(centrosome)|GO:0005829(cytosol)|GO:0005911(cell-cell junction)|GO:0005923(tight junction)|GO:0005929(cilium)|GO:0005930(axoneme)|GO:0006996(organelle organization)|GO:0007163(establishment …	"Homo sapiens RPGRIP1-like (RPGRIP1L), transcript variant 1, mRNA [NM_015272]"	chr16:53633893-53633834	hs|16q12.2	CAGACAAGATGAGAGAAACAGCCATGTTTCTGTCACATTGTTTACTGTCATATTAAAGAT
A_24_P782308	2.24658	-2.24658	-1.16773	down	246.001	70.2851	-3.09036	-4.25809	Detected	Not Detected	0	NM_001144967	NM_001144967	NM_001144967	Hs.185677	23327	NEDD4L	"neural precursor cell expressed, developmentally down-regulated 4-like, E3 ubiquitin protein ligase"	ENST00000382850	THC2596020	"GO:0000122(negative regulation of transcription from RNA polymerase II promoter)|GO:0003085(negative regulation of systemic arterial blood pressure)|GO:0003254(regulation of membrane depolarization)|GO:0004842(ubiquitin-protein ligase activity)|GO:0005515(protein binding)|GO:0005622(intracellular)|GO:0005634(nucleus)|GO:0005654(nucleoplasm)|GO:0005737(cytoplasm)|GO:0005829(cytosol)|GO:0005886(pl…	"Homo sapiens neural precursor cell expressed, developmentally down-regulated 4-like, E3 ubiquitin protein ligase (NEDD4L), transcript variant j, mRNA [NM_001144967]"	chr18:56068043-56068102	hs|18q21.31	CTCAGACTGATTTCACCTAGATTGTCACGGTTTCCTTCATGTTAACTTTGCGTGACTTTG
A_23_P80156	2.98995	-2.98995	-1.58012	down	6253.46	1342.47	1.57755	-0.00256829	Detected	Detected	0	NM_206962	NM_206962	NM_206962	Hs.154163	3275	PRMT2	protein arginine methyltransferase 2	ENST00000482508	THC2506769	"GO:0003713(transcription coactivator activity)|GO:0004871(signal transducer activity)|GO:0005515(protein binding)|GO:0005634(nucleus)|GO:0005654(nucleoplasm)|GO:0005730(nucleolus)|GO:0005737(cytoplasm)|GO:0005829(cytosol)|GO:0006479(protein methylation)|GO:0007165(signal transduction)|GO:0008469(histone-arginine N-methyltransferase activity)|GO:0016274(protein-arginine N-methyltransferase activi…	"Homo sapiens protein arginine methyltransferase 2 (PRMT2), transcript variant 1, mRNA [NM_206962]"	chr21:48078756-48078815	hs|21q22.3	TGCAGTGCTGATAAGGATTATCGTAGCAAGGTGCTCTTCTGGGACAACGCGTACGAGTTC
A_23_P32233	2.96434	-2.96434	-1.56771	down	1116.19	241.689	-0.908522	-2.47623	Detected	Detected	0	NM_004235	NM_004235	NM_004235	Hs.376206	9314	KLF4	Kruppel-like factor 4 (gut)	ENST00000610832	NP1155361	"GO:0000122(negative regulation of transcription from RNA polymerase II promoter)|GO:0000790(nuclear chromatin)|GO:0000987(core promoter proximal region sequence-specific DNA binding)|GO:0001010(sequence-specific DNA binding transcription factor recruiting transcription factor activity)|GO:0001077(RNA polymerase II core promoter proximal region sequence-specific DNA binding transcription factor a…	"Homo sapiens Kruppel-like factor 4 (gut) (KLF4), mRNA [NM_004235]"	chr9:110248108-110248049	hs|9q31.2	CGTTCCAGTGCCAAAAATGCGACCGAGCATTTTCCAGGTCGGACCACCTCGCCTTACACA
A_23_P70213	2.95517	-2.95517	-1.56324	down	321.2	69.7654	-2.70556	-4.2688	Detected	Not Detected	0	NM_000038	NM_000038	NM_000038	Hs.158932	324	APC	adenomatous polyposis coli	ENST00000508376	THC2468407	GO:0000281(cytokinesis after mitosis)|GO:0000776(kinetochore)|GO:0001822(kidney development)|GO:0001942(hair follicle development)|GO:0005515(protein binding)|GO:0005634(nucleus)|GO:0005654(nucleoplasm)|GO:0005737(cytoplasm)|GO:0005813(centrosome)|GO:0005829(cytosol)|GO:0005881(cytoplasmic microtubule)|GO:0005886(plasma membrane)|GO:0005913(cell-cell adherens junction)|GO:0005923(tight junction)|…	"Homo sapiens adenomatous polyposis coli (APC), transcript variant 3, mRNA [NM_000038]"	chr5:112180822-112180881	hs|5q22.2	AACAATTGAAGAAGACTGTTGCCACTTAACCATTCCATGCGTTGGCACTTATCTATTCCT
A_24_P122050	2.95389	-2.95389	-1.56262	down	11702.4	2542.89	2.48163	0.91901	Detected	Detected	0	NM_006814	NM_006814	NM_006814	Hs.471917	9491	PSMF1	"proteasome (prosome, macropain) inhibitor subunit 1 (PI31)"	ENST00000381899	THC2515240	"GO:0000082(G1/S transition of mitotic cell cycle)|GO:0000209(protein polyubiquitination)|GO:0000278(mitotic cell cycle)|GO:0002474(antigen processing and presentation of peptide antigen via MHC class I)|GO:0002479(antigen processing and presentation of exogenous peptide antigen via MHC class I, TAP-dependent)|GO:0004866(endopeptidase inhibitor activity)|GO:0005515(protein binding)|GO:0005654(nuc…	"Homo sapiens proteasome (prosome, macropain) inhibitor subunit 1 (PI31) (PSMF1), transcript variant 1, mRNA [NM_006814]"	chr20:1115812-1115871	hs|20p13	CATCACACCTATCCATGAGCAGTGGGAAAAGGCTAATGTAAGCAGTCCCCACCGGGAGTT
A_23_P2801	2.92655	-2.92655	-1.5492	down	4553.27	998.651	1.1198	-0.429405	Detected	Detected	0	NM_172373	NM_172373	NM_172373	Hs.135646	1997	ELF1	E74-like factor 1 (ets domain transcription factor)	ENST00000239882	THC2789053	"GO:0000978(RNA polymerase II core promoter proximal region sequence-specific DNA binding)|GO:0000981(sequence-specific DNA binding RNA polymerase II transcription factor activity)|GO:0001077(RNA polymerase II core promoter proximal region sequence-specific DNA binding transcription factor activity involved in positive regulation of transcription)|GO:0001817(regulation of cytokine production)|GO:…	"Homo sapiens E74-like factor 1 (ets domain transcription factor) (ELF1), transcript variant 1, mRNA [NM_172373]"	chr13:41506984-41506925	hs|13q14.11	TTAAAGCATCAGCCTAAGAATGGCACTCCCACTAACTAGCCATGTAATCTTGACCTCTTT
A_33_P3228322	2.89136	-2.89136	-1.53175	down	185.039	41.0779	-3.5012	-5.03295	Detected	Not Detected	0	NM_173042	NM_173042	NM_173042	Hs.591967	10068	IL18BP	interleukin 18 binding protein	ENST00000404792	NP600964	GO:0005576(extracellular region)|GO:0005615(extracellular space)|GO:0032496(response to lipopolysaccharide)|GO:0042007(interleukin-18 binding)|GO:0042088(T-helper 1 type immune response)|GO:0048019(receptor antagonist activity)|GO:0070062(extracellular vesicular exosome)|GO:0070301(cellular response to hydrogen peroxide)|GO:0071356(cellular response to tumor necrosis factor)|GO:1900116(extracellu…	"Homo sapiens interleukin 18 binding protein (IL18BP), transcript variant A, mRNA [NM_173042]"	chr11:71712939-71712998	hs|11q13.4	TTGACCAGAGCTTGGGTCCTACCTGTCTACCTGGAGTGAACAGTCCCTGACTGCCTGTAG
A_23_P210515	4.06462	-4.06462	-2.02312	down	834.478	131.778	-1.32816	-3.35128	Detected	Detected	0	NM_020967	NM_020967	NM_020967	Hs.654991	57727	NCOA5	nuclear receptor coactivator 5	ENST00000290231	THC2484698	"GO:0003682(chromatin binding)|GO:0005515(protein binding)|GO:0005615(extracellular space)|GO:0005634(nucleus)|GO:0005654(nucleoplasm)|GO:0006351(transcription, DNA-dependent)|GO:0006355(regulation of transcription, DNA-dependent)|GO:0015629(actin cytoskeleton)|GO:0042593(glucose homeostasis)|GO:0046627(negative regulation of insulin receptor signaling pathway)"	"Homo sapiens nuclear receptor coactivator 5 (NCOA5), mRNA [NM_020967]"	chr20:44690371-44690312	hs|20q13.12	CCATGGCAGCCACAGAAAAAAGAATTTTTCTCTCTGAGCCAAGGTTGTTTTTTGTTTTTT
A_24_P633902	2.86637	-2.86637	-1.51923	down	9665.33	2164.37	2.20572	0.686489	Detected	Detected	0	NM_014455	NM_014455	NM_014455	Hs.523550	27246	RNF115	ring finger protein 115	ENST00000539368	THC2533190	GO:0004842(ubiquitin-protein ligase activity)|GO:0005515(protein binding)|GO:0005829(cytosol)|GO:0008270(zinc ion binding)|GO:0016874(ligase activity)|GO:0042059(negative regulation of epidermal growth factor receptor signaling pathway)|GO:0043162(ubiquitin-dependent protein catabolic process via the multivesicular body sorting pathway)|GO:0051865(protein autoubiquitination)|GO:0070534(protein K6…	"Homo sapiens ring finger protein 115 (RNF115), mRNA [NM_014455]"	chr1:145663334-145682047	hs|1q21.1	GTTCTCGTCCTGACAGATCTCCAGCTATTGAAGGAATACTACCAACACATCTTTGCAGGA
