# Supplementary material for: PLGA/chitosan–heparin composite microparticles prepared with microfluidics for the construction of hMSC aggregates
Source: Royal Society of Chemistry journal article supplement (doi:10.1039/d0tb01593h), 2020-01-01
Supplement: d0tb01593h4.xlsx [file d0tb01593h4.xlsx]

## Sheet: Regulation of cell growth
ProbeName	FC (abs) [MSC/P/C-h 2:1] vs [MSC]	FC [MSC/P/C-h 2:1] vs [MSC]	Log FC [MSC/P/C-h 2:1] vs [MSC]	Regulation [MSC/P/C-h 2:1] vs [MSC]	MSC:gProcessedSignal(raw)	MSC/P/C-h 2:1:gProcessedSignal(raw)	MSC:gProcessedSignal(normalized)	MSC/P/C-h 2:1:gProcessedSignal(normalized)	MSC:gFEFlags	MSC/P/C-h 2:1:gFEFlags	ControlType	PrimaryAccession	RefSeqAccession	GenbankAccession	UniGeneID	EntrezGeneID	GeneSymbol	GeneName	EnsemblID	TIGRID	GO	Description	GenomicCoordinates	Cytoband	Sequence_x000D_
A_23_P102611	3.21861	3.21861	1.68644	up	1160.2	2396.89	-0.852732	0.833704	Detected	Detected	0	NM_003881	NM_003881	NM_003881	Hs.592145	8839	WISP2	WNT1 inducible signaling pathway protein 2	ENST00000372868	THC2486325	GO:0001558(regulation of cell growth)|GO:0005178(integrin binding)|GO:0005520(insulin-like growth factor binding)|GO:0005578(proteinaceous extracellular matrix)|GO:0005615(extracellular space)|GO:0005886(plasma membrane)|GO:0007155(cell adhesion)|GO:0007165(signal transduction)|GO:0007267(cell-cell signaling)|GO:0008201(heparin binding)|GO:0060548(negative regulation of cell death)|GO:0070062(ext…	"Homo sapiens WNT1 inducible signaling pathway protein 2 (WISP2), mRNA [NM_003881]"	chr20:43356347-43356406	hs|20q13.12	CATTTTTCTGGGGGTAGGATGAAGAGAAGGCACACAGAGATTCTGGATCTCCTGCTGCCT
A_24_P89457	3.1784	3.1784	1.6683	up	3522.29	7185.91	0.749411	2.41771	Detected	Detected	0	NM_078467	NM_078467	NM_078467	Hs.370771	1026	CDKN1A	"cyclin-dependent kinase inhibitor 1A (p21, Cip1)"	ENST00000478800	NP526406	"GO:0000079(regulation of cyclin-dependent protein kinase activity)|GO:0000082(G1/S transition of mitotic cell cycle)|GO:0000086(G2/M transition of mitotic cell cycle)|GO:0000278(mitotic cell cycle)|GO:0000307(cyclin-dependent protein kinase holoenzyme complex)|GO:0004861(cyclin-dependent protein kinase inhibitor activity)|GO:0005515(protein binding)|GO:0005634(nucleus)|GO:0005654(nucleoplasm)|GO…	"Homo sapiens cyclin-dependent kinase inhibitor 1A (p21, Cip1) (CDKN1A), transcript variant 2, mRNA [NM_078467]"	chr6:36652178-36652237	hs|6p21.2	TCTGCTGCAGGGGACAGCAGAGGAAGACCATGTGGACCTGTCACTGTCTTGTACCCTTGT
A_23_P111132	5.90588	5.90588	2.56215	up	4410.84	16720.6	1.07395	3.6361	Detected	Detected	0	NM_005345	NM_005345	NM_005345	Hs.274402	3303	HSPA1A	heat shock 70kDa protein 1A	ENST00000375651	THC2597004	"GO:0000151(ubiquitin ligase complex)|GO:0001618(viral receptor activity)|GO:0001664(G-protein coupled receptor binding)|GO:0003725(double-stranded RNA binding)|GO:0005515(protein binding)|GO:0005524(ATP binding)|GO:0005634(nucleus)|GO:0005654(nucleoplasm)|GO:0005737(cytoplasm)|GO:0005739(mitochondrion)|GO:0005783(endoplasmic reticulum)|GO:0005814(centriole)|GO:0005829(cytosol)|GO:0005925(focal a…	"Homo sapiens heat shock 70kDa protein 1A (HSPA1A), mRNA [NM_005345]"	chr6:31785491-31785550	hs|6p21.33	GAGCTTCAAGACTTTGCATTTCCTAGTATTTCTGTTTGTCAGTTCTCAATTTCCTGTGTT
A_33_P3362008	5.8161	5.8161	2.54005	up	4613.04	17221.3	1.13861	3.67867	Detected	Detected	0	NM_002521	NM_002521	NM_002521	Hs.219140	4879	NPPB	natriuretic peptide B	ENST00000376468	THC2474078	GO:0005102(receptor binding)|GO:0005179(hormone activity)|GO:0005576(extracellular region)|GO:0005615(extracellular space)|GO:0006182(cGMP biosynthetic process)|GO:0007166(cell surface receptor signaling pathway)|GO:0007168(receptor guanylyl cyclase signaling pathway)|GO:0007589(body fluid secretion)|GO:0008217(regulation of blood pressure)|GO:0008613(diuretic hormone activity)|GO:0016525(negativ…	"Homo sapiens natriuretic peptide B (NPPB), mRNA [NM_002521]"	chr1:11918391-11918332	hs|1p36.22	CACCGCAAAATGGTCCTCTACACCCTGCGGGCACCACGAAGCCCCAAGATGGTGCAAGGG
A_33_P3568504	7.12441	7.12441	2.83277	up	36.6592	167.641	-5.83678	-3.00401	Not Detected	Detected	0	NM_001261424	NM_001261424	NM_001261424	Hs.10941	151242	PPP1R1C	"protein phosphatase 1, regulatory (inhibitor) subunit 1C"	ENST00000409702	NP1186140	GO:0004864(protein phosphatase inhibitor activity)|GO:0004865(protein serine/threonine phosphatase inhibitor activity)|GO:0005737(cytoplasm)|GO:0006469(negative regulation of protein kinase activity)|GO:0007049(cell cycle)|GO:0030307(positive regulation of cell growth)|GO:0035556(intracellular signal transduction)|GO:0051301(cell division)|GO:1900087(positive regulation of G1/S transition of mito…	"Homo sapiens protein phosphatase 1, regulatory (inhibitor) subunit 1C (PPP1R1C), transcript variant 1, mRNA [NM_001261424]"	chr2:182994189-182994248	hs|2q31.3	GATAGTCTACTACCTGCCAACTACTGAATTATGCAGCAGACTTATAAAAATAAAAAGGCT
A_24_P173124	5.57228	-5.57228	-2.47827	down	1642.72	189.225	-0.351012	-2.82928	Detected	Detected	0	NM_144997	NM_144997	NM_144997	Hs.31652	201163	FLCN	folliculin	ENST00000285071	THC2473570	GO:0000122(negative regulation of transcription from RNA polymerase II promoter)|GO:0001701(in utero embryonic development)|GO:0001932(regulation of protein phosphorylation)|GO:0001934(positive regulation of protein phosphorylation)|GO:0005515(protein binding)|GO:0005634(nucleus)|GO:0005737(cytoplasm)|GO:0005886(plasma membrane)|GO:0007043(cell-cell junction assembly)|GO:0010629(negative regulati…	"Homo sapiens folliculin (FLCN), transcript variant 1, mRNA [NM_144997]"	chr17:17116193-17116134	hs|17p11.2	GCTGCTTTCAACATTTACGTTTGGTTACAGTTAACTATTTTCGGAGTGTGGTGATTGAAG
A_23_P79259	4.73463	-4.73463	-2.24325	down	3354.74	454.8	0.679096	-1.56415	Detected	Detected	0	NM_014521	NM_014521	NM_014521	Hs.516777	23677	SH3BP4	SH3-domain binding protein 4	ENST00000409212	THC2765809	GO:0005092(GDP-dissociation inhibitor activity)|GO:0005515(protein binding)|GO:0005634(nucleus)|GO:0005737(cytoplasm)|GO:0005905(coated pit)|GO:0006897(endocytosis)|GO:0008285(negative regulation of cell proliferation)|GO:0010508(positive regulation of autophagy)|GO:0017016(Ras GTPase binding)|GO:0030136(clathrin-coated vesicle)|GO:0030308(negative regulation of cell growth)|GO:0032007(negative r…	"Homo sapiens SH3-domain binding protein 4 (SH3BP4), mRNA [NM_014521]"	chr2:235963306-235963365	hs|2q37.2	TGCTACGAGGCCATTGTACTGTTTTTTCCTTGAGGTCAAAGCAGTGCTTCCCATAGAGTT
A_23_P82775	4.37087	-4.37087	-2.12792	down	144.069	21.1568	-3.86227	-5.99019	Detected	Not Detected	0	NM_022454	NM_022454	NM_022454	Hs.98367	64321	SOX17	SRY (sex determining region Y)-box 17	ENST00000297316	THC2471882	"GO:0000122(negative regulation of transcription from RNA polymerase II promoter)|GO:0001525(angiogenesis)|GO:0001570(vasculogenesis)|GO:0001706(endoderm formation)|GO:0001828(inner cell mass cellular morphogenesis)|GO:0001947(heart looping)|GO:0003142(cardiogenic plate morphogenesis)|GO:0003143(embryonic heart tube morphogenesis)|GO:0003151(outflow tract morphogenesis)|GO:0003308(negative regula…	"Homo sapiens SRY (sex determining region Y)-box 17 (SOX17), mRNA [NM_022454]"	chr8:55372791-55372850	hs|8q11.23	ACCCTATTTCCAAGTTCAAGTTAACTAGCTTTGAATGTGTCCCAAAACAGCTTCCTCCAT
A_33_P3347911	3.98263	-3.98263	-1.99372	down	98.0126	15.7965	-4.41799	-6.41171	Detected	Not Detected	0	NM_001271877	NM_001271877	NM_001271877	Hs.660607	2100	ESR2	estrogen receptor 2 (ER beta)	ENST00000344288	NP083886	"GO:0000122(negative regulation of transcription from RNA polymerase II promoter)|GO:0001046(core promoter sequence-specific DNA binding)|GO:0001541(ovarian follicle development)|GO:0001764(neuron migration)|GO:0003677(DNA binding)|GO:0003700(sequence-specific DNA binding transcription factor activity)|GO:0003707(steroid hormone receptor activity)|GO:0003713(transcription coactivator activity)|GO…	"Homo sapiens estrogen receptor 2 (ER beta) (ESR2), transcript variant g, mRNA [NM_001271877]"	chr14:64735617-64735558	hs|14q23.2	ATATTTGTCCAGCTACAAATCAGTGTACAATCGATAAAAACCGGCGCAAGAGCTGCCAGG
A_23_P1374	3.12261	-3.12261	-1.64275	down	78.6025	16.1572	-4.73638	-6.37914	Detected	Not Detected	0	NM_006257	NM_006257	NM_006257	Hs.498570	5588	PRKCQ	"protein kinase C, theta"	ENST00000263125	THC2471720	"GO:0001558(regulation of cell growth)|GO:0001772(immunological synapse)|GO:0004674(protein serine/threonine kinase activity)|GO:0004697(protein kinase C activity)|GO:0004842(ubiquitin-protein ligase activity)|GO:0005515(protein binding)|GO:0005524(ATP binding)|GO:0005829(cytosol)|GO:0005886(plasma membrane)|GO:0006355(regulation of transcription, DNA-dependent)|GO:0006468(protein phosphorylation…	"Homo sapiens protein kinase C, theta (PRKCQ), transcript variant 1, mRNA [NM_006257]"	chr10:6470247-6470188	hs|10p15.1	ACTGATCAACAGCATGGACCAGAATATGTTCAGGAACTTTTCCTTCATGAACCCCGGGAT
A_24_P179044	2.96445	-2.96445	-1.56776	down	7228.42	1565.12	1.78658	0.218814	Detected	Detected	0	NM_016224	NM_016224	NM_016224	Hs.191213	51429	SNX9	sorting nexin 9	ENST00000392185	THC2780937	GO:0000281(cytokinesis after mitosis)|GO:0001726(ruffle)|GO:0005515(protein binding)|GO:0005545(1-phosphatidylinositol binding)|GO:0005737(cytoplasm)|GO:0005768(endosome)|GO:0005802(trans-Golgi network)|GO:0005886(plasma membrane)|GO:0006886(intracellular protein transport)|GO:0006897(endocytosis)|GO:0006898(receptor-mediated endocytosis)|GO:0007067(mitosis)|GO:0016023(cytoplasmic membrane-bounde…	"Homo sapiens sorting nexin 9 (SNX9), mRNA [NM_016224]"	chr6:158330798-158330974	hs|6q25.3	CATCGAATATCAGCTAACACCTACTAACACTAATCGATCTGTAAACCACAGGTATAAGCA
A_33_P3258946	3.41457	-3.41457	-1.7717	down	1444.03	271.449	-0.537	-2.3087	Detected	Detected	0	NM_001193286	NM_001193286	NM_001193286	Hs.466693	22933	SIRT2	sirtuin 2	ENST00000407552	NP1076425	"GO:0000122(negative regulation of transcription from RNA polymerase II promoter)|GO:0000183(chromatin silencing at rDNA)|GO:0003682(chromatin binding)|GO:0003950(NAD+ ADP-ribosyltransferase activity)|GO:0004407(histone deacetylase activity)|GO:0005515(protein binding)|GO:0005634(nucleus)|GO:0005677(chromatin silencing complex)|GO:0005694(chromosome)|GO:0005720(nuclear heterochromatin)|GO:0005737…	"Homo sapiens sirtuin 2 (SIRT2), transcript variant 3, mRNA [NM_001193286]"	chr19:39379793-39379734	hs|19q13.2	AACCATCTGTCACTACTTCATGCGCCTGCTGAAGGACAAGGGGCTACTCCTGCGCTGCTA
A_33_P3327058	3.06532	-3.06532	-1.61604	down	1030.54	215.793	-1.0237	-2.63973	Detected	Detected	0	NM_001162383	NM_001162383	NM_001162383	Hs.743352	9181	ARHGEF2	Rho/Rac guanine nucleotide exchange factor (GEF) 2	ENST00000313667	THC2466712	GO:0000132(establishment of mitotic spindle orientation)|GO:0000902(cell morphogenesis)|GO:0005089(Rho guanyl-nucleotide exchange factor activity)|GO:0005515(protein binding)|GO:0005737(cytoplasm)|GO:0005794(Golgi apparatus)|GO:0005819(spindle)|GO:0005829(cytosol)|GO:0005856(cytoskeleton)|GO:0005874(microtubule)|GO:0005923(tight junction)|GO:0005925(focal adhesion)|GO:0006886(intracellular protei…	"Homo sapiens Rho/Rac guanine nucleotide exchange factor (GEF) 2 (ARHGEF2), transcript variant 1, mRNA [NM_001162383]"	chr1:155920241-155920182	hs|1q22	TGTCACTACTCGCTCTGTCCATCGAAACTTTGAGGACCGAGAGAGGCAGGAACTGGGGAG
A_33_P3271945	3.61347	-3.61347	-1.85339	down	592.74	105.29	-1.82163	-3.67502	Detected	Detected	0	ENST00000380496				54801	HAUS6	"HAUS augmin-like complex, subunit 6"	ENST00000380496	THC2633072	GO:0003674(molecular_function)|GO:0005654(nucleoplasm)|GO:0005737(cytoplasm)|GO:0005813(centrosome)|GO:0005815(microtubule organizing center)|GO:0005819(spindle)|GO:0005874(microtubule)|GO:0007067(mitosis)|GO:0051225(spindle assembly)|GO:0051297(centrosome organization)|GO:0051301(cell division)|GO:0070652(HAUS complex)	"HAUS augmin-like complex, subunit 6 [Source:HGNC Symbol;Acc:HGNC:25948] [ENST00000380496]"	chr9:19056989-19056930	hs|9p22.1	CATTAAGAGAGATAAGGATCTGGTGATACAGATTCATTACATACTCTGATTTGCCCATAA
A_33_P3260445	3.82846	-3.82846	-1.93677	down	436.399	73.1656	-2.26338	-4.20015	Detected	Not Detected	0	ENST00000367088		AK026669	Hs.445999	6993	DYNLT1	"dynein, light chain, Tctex-type 1"	ENST00000367088	THC2499901	GO:0000132(establishment of mitotic spindle orientation)|GO:0003774(motor activity)|GO:0005515(protein binding)|GO:0005794(Golgi apparatus)|GO:0005819(spindle)|GO:0005868(cytoplasmic dynein complex)|GO:0005874(microtubule)|GO:0007067(mitosis)|GO:0008152(metabolic process)|GO:0008277(regulation of G-protein coupled receptor protein signaling pathway)|GO:0019060(intracellular transport of viral pro…	"dynein, light chain, Tctex-type 1 [Source:HGNC Symbol;Acc:HGNC:11697] [ENST00000367088]"	chr6:159058312-159058253	hs|6q25.3	GTTTGCTAAAAGTGGACAGAATGACATTTGTGTTACCCAGTAGACTTCTCTAACAAAAAT
A_23_P357365	3.83482	-3.83482	-1.93916	down	296.145	49.5687	-2.82273	-4.76188	Detected	Not Detected	0	NM_005862	NM_005862	NM_005862	Hs.412586	10274	STAG1	stromal antigen 1	ENST00000483235	THC2484700	"GO:0000278(mitotic cell cycle)|GO:0000775(chromosome, centromeric region)|GO:0000785(chromatin)|GO:0003682(chromatin binding)|GO:0005515(protein binding)|GO:0005634(nucleus)|GO:0005654(nucleoplasm)|GO:0005694(chromosome)|GO:0005829(cytosol)|GO:0007059(chromosome segregation)|GO:0007067(mitosis)|GO:0051301(cell division)"	"Homo sapiens stromal antigen 1 (STAG1), mRNA [NM_005862]"	chr3:136057233-136057082	hs|3q22.3	AGCTATCATAGAAGATGATTCAGGATTTGGAATGCCTATGTTCTGAAGTCTGAAGAAAAT
A_23_P124427	3.96633	-3.96633	-1.98781	down	590.756	95.6019	-1.82647	-3.81427	Detected	Detected	0	NM_012224	NM_012224	NM_012224	Hs.481181	4750	NEK1	NIMA-related kinase 1	ENST00000507142	NP1168571	GO:0000165(MAPK cascade)|GO:0000187(activation of MAPK activity)|GO:0000242(pericentriolar material)|GO:0004672(protein kinase activity)|GO:0004674(protein serine/threonine kinase activity)|GO:0004708(MAP kinase kinase activity)|GO:0004713(protein tyrosine kinase activity)|GO:0005515(protein binding)|GO:0005524(ATP binding)|GO:0005634(nucleus)|GO:0005737(cytoplasm)|GO:0005813(centrosome)|GO:00069…	"Homo sapiens NIMA-related kinase 1 (NEK1), transcript variant 2, mRNA [NM_012224]"	chr4:170315411-170315352	hs|4q33	CCAAAGCATAGGAAACATTGACCCAGAACCTGACTTAATGGTTTTGAAGATTTACTATGC
A_23_P35219	2.03984	-2.03984	-1.02845	down	7130.4	2243.7	1.76688	0.738425	Detected	Detected	0	NM_002497	NM_002497	NM_002497	Hs.153704	4751	NEK2	NIMA-related kinase 2	ENST00000462283	THC2613265	GO:0000070(mitotic sister chromatid segregation)|GO:0000086(G2/M transition of mitotic cell cycle)|GO:0000278(mitotic cell cycle)|GO:0000776(kinetochore)|GO:0000777(condensed chromosome kinetochore)|GO:0000794(condensed nuclear chromosome)|GO:0000922(spindle pole)|GO:0001824(blastocyst development)|GO:0004672(protein kinase activity)|GO:0004674(protein serine/threonine kinase activity)|GO:0005515…	"Homo sapiens NIMA-related kinase 2 (NEK2), transcript variant 1, mRNA [NM_002497]"	chr1:211836920-211836861	hs|1q32.3	AGGAGTGAGAATTCTGAGAGTCAGCTCACATCTAAGTCCAAGTGCAAGGACCTGAAGAAA
A_24_P96780	4.19899	-4.19899	-2.07004	down	1528.56	233.66	-0.454934	-2.52498	Detected	Detected	0	NM_016343	NM_016343	NM_016343	Hs.497741	1063	CENPF	"centromere protein F, 350/400kDa"	ENST00000614578	THC2485218	"GO:0000086(G2/M transition of mitotic cell cycle)|GO:0000278(mitotic cell cycle)|GO:0000775(chromosome, centromeric region)|GO:0000776(kinetochore)|GO:0000785(chromatin)|GO:0000922(spindle pole)|GO:0000940(condensed chromosome outer kinetochore)|GO:0003682(chromatin binding)|GO:0005515(protein binding)|GO:0005634(nucleus)|GO:0005635(nuclear envelope)|GO:0005654(nucleoplasm)|GO:0005737(cytoplasm)…	"Homo sapiens centromere protein F, 350/400kDa (CENPF), mRNA [NM_016343]"	chr1:214826239-214826298	hs|1q41	GCTGGAGATAGACCTTTTAAAGTCTAGTAAAGAAGAGCTCAATAATTCATTGAAAGCTAC
A_23_P96325	4.45495	-4.45495	-2.15541	down	510.132	73.4999	-2.03816	-4.19357	Detected	Detected	0	NM_017669	NM_017669	NM_017669	Hs.47558	54821	ERCC6L	excision repair cross-complementation group 6-like	ENST00000334463	THC2472379	GO:0000278(mitotic cell cycle)|GO:0000777(condensed chromosome kinetochore)|GO:0003677(DNA binding)|GO:0004386(helicase activity)|GO:0005515(protein binding)|GO:0005524(ATP binding)|GO:0005654(nucleoplasm)|GO:0005737(cytoplasm)|GO:0005813(centrosome)|GO:0005829(cytosol)|GO:0005886(plasma membrane)|GO:0007067(mitosis)|GO:0008152(metabolic process)|GO:0016020(membrane)|GO:0051301(cell division)	"Homo sapiens excision repair cross-complementation group 6-like (ERCC6L), mRNA [NM_017669]"	chrX:71425169-71425110	hs|Xq13.1	ACACTGTCTTCAGAAAACAAGTCCAGCTGGTTAATGACGTCTAAGCCTAGTGCTCTAGCT
A_32_P34003	5.84694	-5.84694	-2.54768	down	169.498	18.6073	-3.62776	-6.17545	Detected	Not Detected	0	ENST00000333129				55137	FIGN	fidgetin	ENST00000333129	THC2660651	GO:0005524(ATP binding)|GO:0005634(nucleus)|GO:0005737(cytoplasm)|GO:0005815(microtubule organizing center)|GO:0005874(microtubule)|GO:0007067(mitosis)|GO:0008022(protein C-terminus binding)|GO:0008152(metabolic process)|GO:0008568(microtubule-severing ATPase activity)|GO:0010569(regulation of double-strand break repair via homologous recombination)|GO:0016363(nuclear matrix)|GO:0031122(cytoplasm…	fidgetin [Source:HGNC Symbol;Acc:HGNC:13285] [ENST00000333129]	chr2:164459505-164459446	hs|2q24.3	GAAGCTGCTGTACAATTAACTTGGAGATCTGAAAATGCTTTTTGTCCTCATTGTTGCAGT
A_32_P126609	8.35595	-8.35595	-3.0628	down	1966.12	151.03	-0.0917503	-3.15455	Detected	Detected	0	NM_015110	NM_015110	NM_015110	Hs.534189	23137	SMC5	structural maintenance of chromosomes 5	ENST00000361138	THC2543203	"GO:0000722(telomere maintenance via recombination)|GO:0000724(double-strand break repair via homologous recombination)|GO:0000781(chromosome, telomeric region)|GO:0005515(protein binding)|GO:0005524(ATP binding)|GO:0005634(nucleus)|GO:0005654(nucleoplasm)|GO:0006303(double-strand break repair via nonhomologous end joining)|GO:0007067(mitosis)|GO:0016605(PML body)|GO:0030054(cell junction)|GO:003…	"Homo sapiens structural maintenance of chromosomes 5 (SMC5), mRNA [NM_015110]"	chr9:72968897-72968956	hs|9q21.12	AAGACACGTGAAGATTAAGCATGTTTGAAAATAAAATGGTCAATTACATTTCAATTTACA
A_24_P193592	8.57306	-8.57306	-3.09981	down	185.746	13.907	-3.4957	-6.59551	Detected	Not Detected	0	NM_001761	NM_001761	NM_001761	Hs.1973	899	CCNF	cyclin F	ENST00000293968	THC2463529	GO:0000320(re-entry into mitotic cell cycle)|GO:0001890(placenta development)|GO:0005515(protein binding)|GO:0005634(nucleus)|GO:0005814(centriole)|GO:0007067(mitosis)|GO:0010826(negative regulation of centrosome duplication)|GO:0016567(protein ubiquitination)|GO:0019005(SCF ubiquitin ligase complex)|GO:0031146(SCF-dependent proteasomal ubiquitin-dependent protein catabolic process)|GO:0051301(ce…	"Homo sapiens cyclin F (CCNF), mRNA [NM_001761]"	chr16:2507886-2507945	hs|16p13.3	AAAGAATTTTCCCAGATAGGCTAGCCAGAAAAAACTTCAAGTCCTCTGTAACATCTGAGG
A_33_P3385062	9.74349	-9.74349	-3.28444	down	214.565	14.1349	-3.28762	-6.57205	Detected	Not Detected	0	ENST00000243706		CR749640	Hs.665869	79441	HAUS3	"HAUS augmin-like complex, subunit 3"	ENST00000243706		GO:0003674(molecular_function)|GO:0005737(cytoplasm)|GO:0005813(centrosome)|GO:0005819(spindle)|GO:0005874(microtubule)|GO:0007067(mitosis)|GO:0051225(spindle assembly)|GO:0051297(centrosome organization)|GO:0051301(cell division)|GO:0070652(HAUS complex)	"HAUS augmin-like complex, subunit 3 [Source:HGNC Symbol;Acc:HGNC:28719] [ENST00000243706]"	chr4:2230469-2230410	hs|4p16.3	GACAATATGTGTATTGTGCTGCTATAGAAATGTAAACTCTTAGGTGGCAAGGATTATTGG
A_23_P50232	2.96008	-2.96008	-1.56564	down	1086.47	235.593	-0.947455	-2.51309	Detected	Detected	0	NM_001015878	NM_001015878	NM_001015878	Hs.98338	6795	AURKC	aurora kinase C	ENST00000596375	THC2703769	"GO:0000780(condensed nuclear chromosome, centromeric region)|GO:0000793(condensed chromosome)|GO:0000910(cytokinesis)|GO:0004672(protein kinase activity)|GO:0004712(protein serine/threonine/tyrosine kinase activity)|GO:0005524(ATP binding)|GO:0005737(cytoplasm)|GO:0005819(spindle)|GO:0005876(spindle microtubule)|GO:0006468(protein phosphorylation)|GO:0008608(attachment of spindle microtubules to…	"Homo sapiens aurora kinase C (AURKC), transcript variant 1, mRNA [NM_001015878]"	chr19:57743942-57744001	hs|19q13.43	TCCATGATGCACGCCGGGTGTACCTGATTCTGGAATATGCTCCAAGGGGTGAGCTCTACA
A_33_P3253596	5.68674	-5.68674	-2.5076	down	809.96	91.4213	-1.37118	-3.87878	Detected	Detected	0	NM_012310	NM_012310	NM_012310	Hs.648326	24137	KIF4A	kinesin family member 4A	ENST00000374403	THC2786439	GO:0000281(cytokinesis after mitosis)|GO:0003677(DNA binding)|GO:0003777(microtubule motor activity)|GO:0005515(protein binding)|GO:0005524(ATP binding)|GO:0005654(nucleoplasm)|GO:0005694(chromosome)|GO:0005737(cytoplasm)|GO:0005829(cytosol)|GO:0005871(kinesin complex)|GO:0005876(spindle microtubule)|GO:0006996(organelle organization)|GO:0007018(microtubule-based movement)|GO:0007411(axon guidanc…	"Homo sapiens kinesin family member 4A (KIF4A), mRNA [NM_012310]"	chrX:69626140-69626199	hs|Xq13.1	AGAAACATCTTCCTAAGGATACCCTTCTATCTCCAGACTCTTCTTTTGAATATGTCCCAC
A_33_P3346461	3.1096	-3.1096	-1.63673	down	83.9324	17.325	-4.64173	-6.27846	Detected	Not Detected	0	ENST00000621666		AK311046	Hs.710305	4671	NAIP	"NLR family, apoptosis inhibitory protein"	ENST00000621666	THC2688955	GO:0004842(ubiquitin-protein ligase activity)|GO:0005515(protein binding)|GO:0005524(ATP binding)|GO:0005634(nucleus)|GO:0005737(cytoplasm)|GO:0005876(spindle microtubule)|GO:0006954(inflammatory response)|GO:0007399(nervous system development)|GO:0009966(regulation of signal transduction)|GO:0016323(basolateral plasma membrane)|GO:0016567(protein ubiquitination)|GO:0043027(cysteine-type endopept…	"NLR family, apoptosis inhibitory protein [Source:HGNC Symbol;Acc:HGNC:7634] [ENST00000621666]"	chr5:68919510-68919569	hs|5q13.2	CATTACATGTTTACATTATCATGACTATACAAATGCTATGTGGAGCTGAAGCTTGTGGTA
A_33_P3351356	2.06707	-2.06707	-1.04758	down	2183.53	678.036	0.0595612	-0.988023	Detected	Detected	0	ENST00000398560		BC040474	Hs.98594	9639	ARHGEF10	Rho guanine nucleotide exchange factor (GEF) 10	ENST00000398560	THC2482286	GO:0005089(Rho guanyl-nucleotide exchange factor activity)|GO:0005515(protein binding)|GO:0005813(centrosome)|GO:0005829(cytosol)|GO:0019894(kinesin binding)|GO:0022011(myelination in peripheral nervous system)|GO:0032321(positive regulation of Rho GTPase activity)|GO:0033126(positive regulation of GTP catabolic process)|GO:0051298(centrosome duplication)|GO:0051496(positive regulation of stress …	Rho guanine nucleotide exchange factor (GEF) 10 [Source:HGNC Symbol;Acc:HGNC:14103] [ENST00000398560]	chr8:1851609-1851668	hs|8p23.3	CTGAACAAGGTTGAGAGAGGTTTTCTTCAACTCTATTCCAAAATTATTTTTGCTTTGTGC
A_24_P298420	3.15486	-3.15486	-1.65758	down	1370.54	278.843	-0.612358	-2.26993	Detected	Detected	0	NM_001039619	NM_001039619	NM_001039619	Hs.367854	10419	PRMT5	protein arginine methyltransferase 5	ENST00000553915	THC2521654	"GO:0000122(negative regulation of transcription from RNA polymerase II promoter)|GO:0000387(spliceosomal snRNP assembly)|GO:0001046(core promoter sequence-specific DNA binding)|GO:0003682(chromatin binding)|GO:0003714(transcription corepressor activity)|GO:0005515(protein binding)|GO:0005634(nucleus)|GO:0005654(nucleoplasm)|GO:0005737(cytoplasm)|GO:0005829(cytosol)|GO:0006325(chromatin organizat…	"Homo sapiens protein arginine methyltransferase 5 (PRMT5), transcript variant 2, mRNA [NM_001039619]"	chr14:23393907-23393848	hs|14q11.2	CAATCTGGAATCTCAGACATATGAAGTGTTTGAAAAGGACCCCATCAAATACTCTCAGTA
A_23_P35219	2.03984	-2.03984	-1.02845	down	7130.4	2243.7	1.76688	0.738425	Detected	Detected	0	NM_002497	NM_002497	NM_002497	Hs.153704	4751	NEK2	NIMA-related kinase 2	ENST00000462283	THC2613265	GO:0000070(mitotic sister chromatid segregation)|GO:0000086(G2/M transition of mitotic cell cycle)|GO:0000278(mitotic cell cycle)|GO:0000776(kinetochore)|GO:0000777(condensed chromosome kinetochore)|GO:0000794(condensed nuclear chromosome)|GO:0000922(spindle pole)|GO:0001824(blastocyst development)|GO:0004672(protein kinase activity)|GO:0004674(protein serine/threonine kinase activity)|GO:0005515…	"Homo sapiens NIMA-related kinase 2 (NEK2), transcript variant 1, mRNA [NM_002497]"	chr1:211836920-211836861	hs|1q32.3	AGGAGTGAGAATTCTGAGAGTCAGCTCACATCTAAGTCCAAGTGCAAGGACCTGAAGAAA
A_23_P212830	4.60869	-4.60869	-2.20436	down	198.248	27.6108	-3.40172	-5.60608	Detected	Not Detected	0	NM_000142	NM_000142	NM_000142	Hs.1420	2261	FGFR3	fibroblast growth factor receptor 3	ENST00000260795	NP229416	GO:0000122(negative regulation of transcription from RNA polymerase II promoter)|GO:0000165(MAPK cascade)|GO:0001501(skeletal system development)|GO:0001938(positive regulation of endothelial cell proliferation)|GO:0001958(endochondral ossification)|GO:0002009(morphogenesis of an epithelium)|GO:0002062(chondrocyte differentiation)|GO:0002089(lens morphogenesis in camera-type eye)|GO:0003416(endoc…	"Homo sapiens fibroblast growth factor receptor 3 (FGFR3), transcript variant 1, mRNA [NM_000142]"	chr4:1809054-1809113	hs|4p16.3	CACTCCCCGGCATGAGACTCAGTGCAGATGGAGAGACAGCTACACAGAGCTTTGGTCTGT
A_23_P50232	2.96008	-2.96008	-1.56564	down	1086.47	235.593	-0.947455	-2.51309	Detected	Detected	0	NM_001015878	NM_001015878	NM_001015878	Hs.98338	6795	AURKC	aurora kinase C	ENST00000596375	THC2703769	"GO:0000780(condensed nuclear chromosome, centromeric region)|GO:0000793(condensed chromosome)|GO:0000910(cytokinesis)|GO:0004672(protein kinase activity)|GO:0004712(protein serine/threonine/tyrosine kinase activity)|GO:0005524(ATP binding)|GO:0005737(cytoplasm)|GO:0005819(spindle)|GO:0005876(spindle microtubule)|GO:0006468(protein phosphorylation)|GO:0008608(attachment of spindle microtubules to…	"Homo sapiens aurora kinase C (AURKC), transcript variant 1, mRNA [NM_001015878]"	chr19:57743942-57744001	hs|19q13.43	TCCATGATGCACGCCGGGTGTACCTGATTCTGGAATATGCTCCAAGGGGTGAGCTCTACA
A_33_P3258946	3.41457	-3.41457	-1.7717	down	1444.03	271.449	-0.537	-2.3087	Detected	Detected	0	NM_001193286	NM_001193286	NM_001193286	Hs.466693	22933	SIRT2	sirtuin 2	ENST00000407552	NP1076425	"GO:0000122(negative regulation of transcription from RNA polymerase II promoter)|GO:0000183(chromatin silencing at rDNA)|GO:0003682(chromatin binding)|GO:0003950(NAD+ ADP-ribosyltransferase activity)|GO:0004407(histone deacetylase activity)|GO:0005515(protein binding)|GO:0005634(nucleus)|GO:0005677(chromatin silencing complex)|GO:0005694(chromosome)|GO:0005720(nuclear heterochromatin)|GO:0005737…	"Homo sapiens sirtuin 2 (SIRT2), transcript variant 3, mRNA [NM_001193286]"	chr19:39379793-39379734	hs|19q13.2	AACCATCTGTCACTACTTCATGCGCCTGCTGAAGGACAAGGGGCTACTCCTGCGCTGCTA
A_23_P35219	2.03984	-2.03984	-1.02845	down	7130.4	2243.7	1.76688	0.738425	Detected	Detected	0	NM_002497	NM_002497	NM_002497	Hs.153704	4751	NEK2	NIMA-related kinase 2	ENST00000462283	THC2613265	GO:0000070(mitotic sister chromatid segregation)|GO:0000086(G2/M transition of mitotic cell cycle)|GO:0000278(mitotic cell cycle)|GO:0000776(kinetochore)|GO:0000777(condensed chromosome kinetochore)|GO:0000794(condensed nuclear chromosome)|GO:0000922(spindle pole)|GO:0001824(blastocyst development)|GO:0004672(protein kinase activity)|GO:0004674(protein serine/threonine kinase activity)|GO:0005515…	"Homo sapiens NIMA-related kinase 2 (NEK2), transcript variant 1, mRNA [NM_002497]"	chr1:211836920-211836861	hs|1q32.3	AGGAGTGAGAATTCTGAGAGTCAGCTCACATCTAAGTCCAAGTGCAAGGACCTGAAGAAA
A_24_P221858	5.14101	-5.14101	-2.36205	down	113.486	14.1691	-4.20652	-6.56857	Detected	Not Detected	0	NM_001008496	NM_001008496	NM_001008496	Hs.448343	440822	PIWIL3	piwi-like RNA-mediated gene silencing 3	ENST00000532537	THC2484453	GO:0003723(RNA binding)|GO:0005737(cytoplasm)|GO:0006417(regulation of translation)|GO:0007275(multicellular organismal development)|GO:0007283(spermatogenesis)|GO:0030154(cell differentiation)|GO:0031047(gene silencing by RNA)|GO:0051321(meiotic cell cycle)	"Homo sapiens piwi-like RNA-mediated gene silencing 3 (PIWIL3), transcript variant 1, mRNA [NM_001008496]"	chr22:25120872-25119182	hs|22q11.23	AAACCATCTCTCCTAACAATTTCACTCTAGCTTTCATTGTGGTGAAGAAACGAATAAACA
A_23_P253074	6.20122	-6.20122	-2.63255	down	219.05	22.6733	-3.25777	-5.89032	Detected	Not Detected	0	NM_018068	NM_018068	NM_018068	Hs.614809	55124	PIWIL2	piwi-like RNA-mediated gene silencing 2	ENST00000519884	THC2491476	GO:0000966(RNA 5'-end processing)|GO:0003729(mRNA binding)|GO:0005737(cytoplasm)|GO:0005844(polysome)|GO:0007275(multicellular organismal development)|GO:0007283(spermatogenesis)|GO:0010467(gene expression)|GO:0030718(germ-line stem cell maintenance)|GO:0031047(gene silencing by RNA)|GO:0033391(chromatoid body)|GO:0034584(piRNA binding)|GO:0034587(piRNA metabolic process)|GO:0043046(DNA methylati…	"Homo sapiens piwi-like RNA-mediated gene silencing 2 (PIWIL2), transcript variant 2, mRNA [NM_018068]"	chr8:22210694-22211811	hs|8p21.3	GTGGTAGATCATACAATAACAAGCTGTGAGTGGGTGGATTTCTATCTTCTTGCCCATCAT
A_23_P80156	2.98995	-2.98995	-1.58012	down	6253.46	1342.47	1.57755	-0.00256829	Detected	Detected	0	NM_206962	NM_206962	NM_206962	Hs.154163	3275	PRMT2	protein arginine methyltransferase 2	ENST00000482508	THC2506769	"GO:0003713(transcription coactivator activity)|GO:0004871(signal transducer activity)|GO:0005515(protein binding)|GO:0005634(nucleus)|GO:0005654(nucleoplasm)|GO:0005730(nucleolus)|GO:0005737(cytoplasm)|GO:0005829(cytosol)|GO:0006479(protein methylation)|GO:0007165(signal transduction)|GO:0008469(histone-arginine N-methyltransferase activity)|GO:0016274(protein-arginine N-methyltransferase activi…	"Homo sapiens protein arginine methyltransferase 2 (PRMT2), transcript variant 1, mRNA [NM_206962]"	chr21:48078756-48078815	hs|21q22.3	TGCAGTGCTGATAAGGATTATCGTAGCAAGGTGCTCTTCTGGGACAACGCGTACGAGTTC
A_23_P210886	3.22092	-3.22092	-1.68747	down	229.825	45.7999	-3.1885	-4.87597	Detected	Not Detected	0	NM_138578	NM_138578	NM_138578	Hs.516966	598	BCL2L1	BCL2-like 1	ENST00000307677	THC2507989	"GO:0000910(cytokinesis)|GO:0001541(ovarian follicle development)|GO:0001701(in utero embryonic development)|GO:0001836(release of cytochrome c from mitochondria)|GO:0005515(protein binding)|GO:0005634(nucleus)|GO:0005730(nucleolus)|GO:0005737(cytoplasm)|GO:0005739(mitochondrion)|GO:0005741(mitochondrial outer membrane)|GO:0005743(mitochondrial inner membrane)|GO:0005759(mitochondrial matrix)|GO:…	"Homo sapiens BCL2-like 1 (BCL2L1), transcript variant 1, mRNA [NM_138578]"	chr20:30253383-30253324	hs|20q11.21	GAACCTCTTCCCCAGAAAGGAGACTAGATTGCCTTTGTTTTGATGTTTGTGGCCTCAGAA
A_24_P97836	5.05996	-5.05996	-2.33912	down	1375.8	174.525	-0.606828	-2.94595	Detected	Detected	0	NM_002873	NM_002873	NM_002873	Hs.16184	5884	RAD17	RAD17 homolog (S. pombe)	ENST00000380774	THC2467632	"GO:0000076(DNA replication checkpoint)|GO:0000077(DNA damage checkpoint)|GO:0000781(chromosome, telomeric region)|GO:0005515(protein binding)|GO:0005524(ATP binding)|GO:0005634(nucleus)|GO:0005654(nucleoplasm)|GO:0006260(DNA replication)|GO:0006281(DNA repair)|GO:0006974(response to DNA damage stimulus)|GO:0007093(mitotic cell cycle checkpoint)|GO:0008156(negative regulation of DNA replication)|…	"Homo sapiens RAD17 homolog (S. pombe) (RAD17), transcript variant 8, mRNA [NM_002873]"	chr5:68695972-68706354	hs|5q13.2	CTAACCATTCCAATGAGAAATCAAGCTCAGATTTCTTTTATCCAAGATATTGGAAGGCTC
A_24_P220771	3.24272	-3.24272	-1.69721	down	436.89	86.4788	-2.26176	-3.95897	Detected	Not Detected	0	NM_032217	NM_032217	NM_032217	Hs.601206	26057	ANKRD17	ankyrin repeat domain 17	ENST00000514252	THC2617457	GO:0000785(chromatin)|GO:0001955(blood vessel maturation)|GO:0003682(chromatin binding)|GO:0005515(protein binding)|GO:0005634(nucleus)|GO:0005737(cytoplasm)|GO:0006275(regulation of DNA replication)|GO:0016020(membrane)|GO:0016032(viral reproduction)|GO:0042742(defense response to bacterium)|GO:0043123(positive regulation of I-kappaB kinase/NF-kappaB cascade)|GO:0045087(innate immune response)|G…	"Homo sapiens ankyrin repeat domain 17 (ANKRD17), transcript variant 1, mRNA [NM_032217]"	chr4:74005746-74005687	hs|4q13.3	CAAAAGATTTTGGAGGAACTACAGAAAGTAGAACGAGAGTTACAACTGAAAACTCAGCAG
A_23_P151653	3.52489	-3.52489	-1.81758	down	24188.9	4404.72	3.52917	1.71159	Detected	Detected	0	NM_080649	NM_080649	NM_080649	Hs.73722	328	APEX1	APEX nuclease (multifunctional DNA repair enzyme) 1	ENST00000557181	THC2517270	"GO:0000278(mitotic cell cycle)|GO:0000722(telomere maintenance via recombination)|GO:0000723(telomere maintenance)|GO:0000724(double-strand break repair via homologous recombination)|GO:0000737(DNA catabolic process, endonucleolytic)|GO:0000738(DNA catabolic process, exonucleolytic)|GO:0003677(DNA binding)|GO:0003684(damaged DNA binding)|GO:0003713(transcription coactivator activity)|GO:0003714(…	"Homo sapiens APEX nuclease (multifunctional DNA repair enzyme) 1 (APEX1), transcript variant 3, mRNA [NM_080649]"	chr14:20924246-20924871	hs|14q11.2	AAGAAAGGATTAGATTGGGTAAAGGAAGAAGCCCCAGATATACTGTGCCTTCAAGAGACC
A_24_P312189	4.18843	-4.18843	-2.06641	down	6072.07	930.535	1.53509	-0.531324	Detected	Detected	0	NM_019606	NM_019606	NM_019606	Hs.178011	56257	MEPCE	methylphosphate capping enzyme	ENST00000310512	THC2723254	GO:0000122(negative regulation of transcription from RNA polymerase II promoter)|GO:0001510(RNA methylation)|GO:0008173(RNA methyltransferase activity)|GO:0008757(S-adenosylmethionine-dependent methyltransferase activity)|GO:0016073(snRNA metabolic process)|GO:0035562(negative regulation of chromatin binding)|GO:0040031(snRNA modification)|GO:1900087(positive regulation of G1/S transition of mito…	"Homo sapiens methylphosphate capping enzyme (MEPCE), transcript variant 1, mRNA [NM_019606]"	chr7:100030741-100030925	hs|7q22.1	GCAAGAGAAAGACTCTTACAGAAACGATCTACAAGAACTACTACCGAATCCAATTGAAGC
A_24_P96780	4.19899	-4.19899	-2.07004	down	1528.56	233.66	-0.454934	-2.52498	Detected	Detected	0	NM_016343	NM_016343	NM_016343	Hs.497741	1063	CENPF	"centromere protein F, 350/400kDa"	ENST00000614578	THC2485218	"GO:0000086(G2/M transition of mitotic cell cycle)|GO:0000278(mitotic cell cycle)|GO:0000775(chromosome, centromeric region)|GO:0000776(kinetochore)|GO:0000785(chromatin)|GO:0000922(spindle pole)|GO:0000940(condensed chromosome outer kinetochore)|GO:0003682(chromatin binding)|GO:0005515(protein binding)|GO:0005634(nucleus)|GO:0005635(nuclear envelope)|GO:0005654(nucleoplasm)|GO:0005737(cytoplasm)…	"Homo sapiens centromere protein F, 350/400kDa (CENPF), mRNA [NM_016343]"	chr1:214826239-214826298	hs|1q41	GCTGGAGATAGACCTTTTAAAGTCTAGTAAAGAAGAGCTCAATAATTCATTGAAAGCTAC
A_33_P3362562	5.02719	-5.02719	-2.32975	down	453.407	57.8909	-2.20822	-4.53798	Detected	Not Detected	0	NM_001272043	NM_001272043	NM_001272043	Hs.463642	6198	RPS6KB1	"ribosomal protein S6 kinase, 70kDa, polypeptide 1"	ENST00000577881	THC2783925	GO:0000082(G1/S transition of mitotic cell cycle)|GO:0003009(skeletal muscle contraction)|GO:0004672(protein kinase activity)|GO:0004711(ribosomal protein S6 kinase activity)|GO:0004712(protein serine/threonine/tyrosine kinase activity)|GO:0005515(protein binding)|GO:0005524(ATP binding)|GO:0005634(nucleus)|GO:0005654(nucleoplasm)|GO:0005737(cytoplasm)|GO:0005739(mitochondrion)|GO:0005741(mitocho…	"Homo sapiens ribosomal protein S6 kinase, 70kDa, polypeptide 1 (RPS6KB1), transcript variant 3, mRNA [NM_001272043]"	chr17:58009023-58009082	hs|17q23.1	CATCAAAAGGGGATCATATACAGAGACCTGAAGCCGGAGAATATCATTCTTAATCACCAA
A_24_P214231	5.88102	-5.88102	-2.55607	down	198.524	21.6674	-3.39972	-5.95578	Detected	Not Detected	0	NM_001048166	NM_001048166	NM_001048166	Hs.525198	6491	STIL	SCL/TAL1 interrupting locus	ENST00000371877	THC2470718	GO:0000578(embryonic axis specification)|GO:0001701(in utero embryonic development)|GO:0001843(neural tube closure)|GO:0001947(heart looping)|GO:0005515(protein binding)|GO:0005737(cytoplasm)|GO:0005813(centrosome)|GO:0005814(centriole)|GO:0005829(cytosol)|GO:0007052(mitotic spindle organization)|GO:0007224(smoothened signaling pathway)|GO:0007368(determination of left/right symmetry)|GO:0008283(…	"Homo sapiens SCL/TAL1 interrupting locus (STIL), transcript variant 1, mRNA [NM_001048166]"	chr1:47716850-47716791	hs|1p33	CTTAGATGTAAAACGTCTCAGACAGTTACCAAAATTATTTTAACCTTTTAACTCCCTGCC
A_24_P193592	8.57306	-8.57306	-3.09981	down	185.746	13.907	-3.4957	-6.59551	Detected	Not Detected	0	NM_001761	NM_001761	NM_001761	Hs.1973	899	CCNF	cyclin F	ENST00000293968	THC2463529	GO:0000320(re-entry into mitotic cell cycle)|GO:0001890(placenta development)|GO:0005515(protein binding)|GO:0005634(nucleus)|GO:0005814(centriole)|GO:0007067(mitosis)|GO:0010826(negative regulation of centrosome duplication)|GO:0016567(protein ubiquitination)|GO:0019005(SCF ubiquitin ligase complex)|GO:0031146(SCF-dependent proteasomal ubiquitin-dependent protein catabolic process)|GO:0051301(ce…	"Homo sapiens cyclin F (CCNF), mRNA [NM_001761]"	chr16:2507886-2507945	hs|16p13.3	AAAGAATTTTCCCAGATAGGCTAGCCAGAAAAAACTTCAAGTCCTCTGTAACATCTGAGG
A_33_P3304427	8.91631	-8.91631	-3.15645	down	230.314	16.5799	-3.18543	-6.34188	Detected	Not Detected	0	NM_001190787	NM_001190787	NM_001190787	Hs.394578	345643	MCIDAS	multiciliate differentiation and DNA synthesis associated cell cycle protein	ENST00000513468	THC2602724	"GO:0003713(transcription coactivator activity)|GO:0005515(protein binding)|GO:0005634(nucleus)|GO:0005730(nucleolus)|GO:0006275(regulation of DNA replication)|GO:0006351(transcription, DNA-dependent)|GO:0007049(cell cycle)|GO:0007346(regulation of mitotic cell cycle)|GO:0042384(cilium assembly)|GO:0042802(identical protein binding)|GO:0044458(motile cilium assembly)|GO:0045944(positive regulatio…	"Homo sapiens multiciliate differentiation and DNA synthesis associated cell cycle protein (MCIDAS), mRNA [NM_001190787]"	chr5:54515713-54515654	hs|5q11.2	TCCCTCGTCCTAAAAGGACACCTAATTTTGTTACTATTGAAAATTTTTATTTTGGTGGCC
A_33_P3302861	3.02492	-3.02492	-1.5969	down	97.7746	20.7472	-4.4215	-6.0184	Detected	Not Detected	0	NM_015272	NM_015272	NM_015272	Hs.298382	23322	RPGRIP1L	RPGRIP1-like	ENST00000621565	THC2645625	GO:0001701(in utero embryonic development)|GO:0001736(establishment of planar polarity)|GO:0001822(kidney development)|GO:0001889(liver development)|GO:0005515(protein binding)|GO:0005737(cytoplasm)|GO:0005813(centrosome)|GO:0005829(cytosol)|GO:0005911(cell-cell junction)|GO:0005923(tight junction)|GO:0005929(cilium)|GO:0005930(axoneme)|GO:0006996(organelle organization)|GO:0007163(establishment …	"Homo sapiens RPGRIP1-like (RPGRIP1L), transcript variant 1, mRNA [NM_015272]"	chr16:53633893-53633834	hs|16q12.2	CAGACAAGATGAGAGAAACAGCCATGTTTCTGTCACATTGTTTACTGTCATATTAAAGAT
A_23_P430161	3.15505	-3.15505	-1.65766	down	792.899	161.309	-1.40189	-3.05956	Detected	Detected	0	NM_175876	NM_175876	NM_175876	Hs.356198	149371	EXOC8	exocyst complex component 8	ENST00000366645	THC2474277	GO:0000145(exocyst)|GO:0001927(exocyst assembly)|GO:0005515(protein binding)|GO:0005737(cytoplasm)|GO:0005770(late endosome)|GO:0005829(cytosol)|GO:0005886(plasma membrane)|GO:0006996(organelle organization)|GO:0007032(endosome organization)|GO:0015031(protein transport)|GO:0016020(membrane)|GO:0017160(Ral GTPase binding)|GO:0022617(extracellular matrix disassembly)|GO:0030426(growth cone)|GO:004…	"Homo sapiens exocyst complex component 8 (EXOC8), mRNA [NM_175876]"	chr1:231469145-231469086	hs|1q42.2	AAGTACAGGATTTTCTTCAGGTAAAATCTGTGTGTTCCAATTACAGTTGTAGCTGAAGGA
A_33_P3369158	3.5763	-3.5763	-1.83847	down	506.083	90.8313	-2.04966	-3.88812	Detected	Detected	0	NM_002254	NM_002254	NM_002254	Hs.21611	3797	KIF3C	kinesin family member 3C	ENST00000405914	THC2506203	GO:0003774(motor activity)|GO:0003777(microtubule motor activity)|GO:0005524(ATP binding)|GO:0005829(cytosol)|GO:0005871(kinesin complex)|GO:0005874(microtubule)|GO:0006996(organelle organization)|GO:0007018(microtubule-based movement)|GO:0007596(blood coagulation)|GO:0008017(microtubule binding)|GO:0008152(metabolic process)|GO:0016887(ATPase activity)|GO:0019886(antigen processing and presentat…	"Homo sapiens kinesin family member 3C (KIF3C), mRNA [NM_002254]"	chr2:26151681-26151622	hs|2p23.3	CTCCTTTATTTAATTCATGTTATTTATTCGCGGAGCTCTGTTCGTGTTGGGGAGATGCCC
A_33_P3360087	3.88585	-3.88585	-1.95823	down	94.1888	15.5582	-4.4754	-6.43363	Detected	Not Detected	0	NM_014451	NM_014451	NM_014451	Hs.372360	27241	BBS9	Bardet-Biedl syndrome 9	ENST00000433714	NP1161145	GO:0000242(pericentriolar material)|GO:0003674(molecular_function)|GO:0005515(protein binding)|GO:0005829(cytosol)|GO:0005929(cilium)|GO:0006996(organelle organization)|GO:0007601(visual perception)|GO:0015031(protein transport)|GO:0034464(BBSome)|GO:0042384(cilium assembly)|GO:0045444(fat cell differentiation)|GO:0050896(response to stimulus)|GO:0060170(cilium membrane)	"Homo sapiens Bardet-Biedl syndrome 9 (BBS9), transcript variant 1, mRNA [NM_014451]"	chr7:33388722-33388781	hs|7p14.3	TCAGTCTACGTGCAACCACCATTAGAATTGACTTGTGATCAGTTCACCTTTGAATTTATG
A_23_P35219	2.03984	-2.03984	-1.02845	down	7130.4	2243.7	1.76688	0.738425	Detected	Detected	0	NM_002497	NM_002497	NM_002497	Hs.153704	4751	NEK2	NIMA-related kinase 2	ENST00000462283	THC2613265	GO:0000070(mitotic sister chromatid segregation)|GO:0000086(G2/M transition of mitotic cell cycle)|GO:0000278(mitotic cell cycle)|GO:0000776(kinetochore)|GO:0000777(condensed chromosome kinetochore)|GO:0000794(condensed nuclear chromosome)|GO:0000922(spindle pole)|GO:0001824(blastocyst development)|GO:0004672(protein kinase activity)|GO:0004674(protein serine/threonine kinase activity)|GO:0005515…	"Homo sapiens NIMA-related kinase 2 (NEK2), transcript variant 1, mRNA [NM_002497]"	chr1:211836920-211836861	hs|1q32.3	AGGAGTGAGAATTCTGAGAGTCAGCTCACATCTAAGTCCAAGTGCAAGGACCTGAAGAAA
A_33_P3305731	4.35565	-4.35565	-2.12289	down	99.4401	14.654	-4.39713	-6.52002	Detected	Not Detected	0	NM_025176	NM_025176	NM_025176	Hs.631508	22981	NINL	ninein-like	ENST00000496509	THC2668079	GO:0000086(G2/M transition of mitotic cell cycle)|GO:0000278(mitotic cell cycle)|GO:0005509(calcium ion binding)|GO:0005815(microtubule organizing center)|GO:0005829(cytosol)|GO:0005874(microtubule)|GO:0006996(organelle organization)	"Homo sapiens ninein-like (NINL), mRNA [NM_025176]"	chr20:25442259-25442200	hs|20p11.21	CAAAAACTTAGAGTTGAACTTGAATGCCTGAATCAGGAACATCAGAGCCTGCAGCTGCCA
A_33_P3290945	4.4963	-4.4963	-2.16874	down	4899.23	699.392	1.22545	-0.943285	Detected	Detected	0	NM_017952	NM_017952	NM_017952	Hs.323489	55037	PTCD3	pentatricopeptide repeat domain 3	ENST00000465560	THC2580786	GO:0005739(mitochondrion)|GO:0005743(mitochondrial inner membrane)|GO:0006417(regulation of translation)|GO:0006996(organelle organization)|GO:0019843(rRNA binding)|GO:0032543(mitochondrial translation)|GO:0043024(ribosomal small subunit binding)|GO:0070124(mitochondrial translational initiation)|GO:0070125(mitochondrial translational elongation)|GO:0070126(mitochondrial translational termination)	"Homo sapiens pentatricopeptide repeat domain 3 (PTCD3), mRNA [NM_017952]"	chr2:86348655-86348714	hs|2p11.2	TATGGTGACCAGGAGCCCTCAACTGATTACCATTTTCAACAAACTGGACAGTCAGAAGCA
A_33_P3253596	5.68674	-5.68674	-2.5076	down	809.96	91.4213	-1.37118	-3.87878	Detected	Detected	0	NM_012310	NM_012310	NM_012310	Hs.648326	24137	KIF4A	kinesin family member 4A	ENST00000374403	THC2786439	GO:0000281(cytokinesis after mitosis)|GO:0003677(DNA binding)|GO:0003777(microtubule motor activity)|GO:0005515(protein binding)|GO:0005524(ATP binding)|GO:0005654(nucleoplasm)|GO:0005694(chromosome)|GO:0005737(cytoplasm)|GO:0005829(cytosol)|GO:0005871(kinesin complex)|GO:0005876(spindle microtubule)|GO:0006996(organelle organization)|GO:0007018(microtubule-based movement)|GO:0007411(axon guidanc…	"Homo sapiens kinesin family member 4A (KIF4A), mRNA [NM_012310]"	chrX:69626140-69626199	hs|Xq13.1	AGAAACATCTTCCTAAGGATACCCTTCTATCTCCAGACTCTTCTTTTGAATATGTCCCAC
A_23_P89727	2.89088	-2.89088	-1.53151	down	243.626	54.093	-3.10436	-4.63587	Detected	Not Detected	0	NM_048368	NM_048368	NM_048368	Hs.465490	9150	CTDP1	"CTD (carboxy-terminal domain, RNA polymerase II, polypeptide A) phosphatase, subunit 1"	ENST00000075430	THC2735040	GO:0000922(spindle pole)|GO:0003899(DNA-directed RNA polymerase activity)|GO:0005654(nucleoplasm)|GO:0005737(cytoplasm)|GO:0005813(centrosome)|GO:0005819(spindle)|GO:0006366(transcription from RNA polymerase II promoter)|GO:0006368(transcription elongation from RNA polymerase II promoter)|GO:0006470(protein dephosphorylation)|GO:0008420(CTD phosphatase activity)|GO:0010458(exit from mitosis)|GO:0…	"Homo sapiens CTD (carboxy-terminal domain, RNA polymerase II, polypeptide A) phosphatase, subunit 1 (CTDP1), transcript variant 2, mRNA [NM_048368]"	chr18:77475245-77475304	hs|18q23	GATCCTGGTCCGTGTACACACTGACTACTATGCCAAGTATGACCGCTACCTCAACAAGGA
A_23_P210675	2.96451	-2.96451	-1.56779	down	124.154	26.8817	-4.0769	-5.64469	Detected	Not Detected	0	NM_014258	NM_014258	NM_014258	Hs.202676	10388	SYCP2	synaptonemal complex protein 2	ENST00000371001	THC2471422	GO:0000795(synaptonemal complex)|GO:0000800(lateral element)|GO:0003677(DNA binding)|GO:0005634(nucleus)|GO:0007130(synaptonemal complex assembly)|GO:0007140(male meiosis)|GO:0007143(female meiosis)|GO:0009566(fertilization)|GO:0043066(negative regulation of apoptotic process)|GO:0046982(protein heterodimerization activity)|GO:0048808(male genitalia morphogenesis)|GO:0051301(cell division)	"Homo sapiens synaptonemal complex protein 2 (SYCP2), mRNA [NM_014258]"	chr20:58440689-58440630	hs|20q13.33	CTTCATTGGCTAAAAGTGTCTTCTGTAATACTGATAGTGAAGAAACTGTTTTTACATCCG
A_33_P3258946	3.41457	-3.41457	-1.7717	down	1444.03	271.449	-0.537	-2.3087	Detected	Detected	0	NM_001193286	NM_001193286	NM_001193286	Hs.466693	22933	SIRT2	sirtuin 2	ENST00000407552	NP1076425	"GO:0000122(negative regulation of transcription from RNA polymerase II promoter)|GO:0000183(chromatin silencing at rDNA)|GO:0003682(chromatin binding)|GO:0003950(NAD+ ADP-ribosyltransferase activity)|GO:0004407(histone deacetylase activity)|GO:0005515(protein binding)|GO:0005634(nucleus)|GO:0005677(chromatin silencing complex)|GO:0005694(chromosome)|GO:0005720(nuclear heterochromatin)|GO:0005737…	"Homo sapiens sirtuin 2 (SIRT2), transcript variant 3, mRNA [NM_001193286]"	chr19:39379793-39379734	hs|19q13.2	AACCATCTGTCACTACTTCATGCGCCTGCTGAAGGACAAGGGGCTACTCCTGCGCTGCTA
A_33_P3327058	3.06532	-3.06532	-1.61604	down	1030.54	215.793	-1.0237	-2.63973	Detected	Detected	0	NM_001162383	NM_001162383	NM_001162383	Hs.743352	9181	ARHGEF2	Rho/Rac guanine nucleotide exchange factor (GEF) 2	ENST00000313667	THC2466712	GO:0000132(establishment of mitotic spindle orientation)|GO:0000902(cell morphogenesis)|GO:0005089(Rho guanyl-nucleotide exchange factor activity)|GO:0005515(protein binding)|GO:0005737(cytoplasm)|GO:0005794(Golgi apparatus)|GO:0005819(spindle)|GO:0005829(cytosol)|GO:0005856(cytoskeleton)|GO:0005874(microtubule)|GO:0005923(tight junction)|GO:0005925(focal adhesion)|GO:0006886(intracellular protei…	"Homo sapiens Rho/Rac guanine nucleotide exchange factor (GEF) 2 (ARHGEF2), transcript variant 1, mRNA [NM_001162383]"	chr1:155920241-155920182	hs|1q22	TGTCACTACTCGCTCTGTCCATCGAAACTTTGAGGACCGAGAGAGGCAGGAACTGGGGAG
A_33_P3271945	3.61347	-3.61347	-1.85339	down	592.74	105.29	-1.82163	-3.67502	Detected	Detected	0	ENST00000380496				54801	HAUS6	"HAUS augmin-like complex, subunit 6"	ENST00000380496	THC2633072	GO:0003674(molecular_function)|GO:0005654(nucleoplasm)|GO:0005737(cytoplasm)|GO:0005813(centrosome)|GO:0005815(microtubule organizing center)|GO:0005819(spindle)|GO:0005874(microtubule)|GO:0007067(mitosis)|GO:0051225(spindle assembly)|GO:0051297(centrosome organization)|GO:0051301(cell division)|GO:0070652(HAUS complex)	"HAUS augmin-like complex, subunit 6 [Source:HGNC Symbol;Acc:HGNC:25948] [ENST00000380496]"	chr9:19056989-19056930	hs|9p22.1	CATTAAGAGAGATAAGGATCTGGTGATACAGATTCATTACATACTCTGATTTGCCCATAA
A_33_P3260445	3.82846	-3.82846	-1.93677	down	436.399	73.1656	-2.26338	-4.20015	Detected	Not Detected	0	ENST00000367088		AK026669	Hs.445999	6993	DYNLT1	"dynein, light chain, Tctex-type 1"	ENST00000367088	THC2499901	GO:0000132(establishment of mitotic spindle orientation)|GO:0003774(motor activity)|GO:0005515(protein binding)|GO:0005794(Golgi apparatus)|GO:0005819(spindle)|GO:0005868(cytoplasmic dynein complex)|GO:0005874(microtubule)|GO:0007067(mitosis)|GO:0008152(metabolic process)|GO:0008277(regulation of G-protein coupled receptor protein signaling pathway)|GO:0019060(intracellular transport of viral pro…	"dynein, light chain, Tctex-type 1 [Source:HGNC Symbol;Acc:HGNC:11697] [ENST00000367088]"	chr6:159058312-159058253	hs|6q25.3	GTTTGCTAAAAGTGGACAGAATGACATTTGTGTTACCCAGTAGACTTCTCTAACAAAAAT

## Sheet: cytokine activity
ProbeName	FC (abs) [MSC/P/C-h 2:1] vs [MSC]	FC [MSC/P/C-h 2:1] vs [MSC]	Log FC [MSC/P/C-h 2:1] vs [MSC]	Regulation [MSC/P/C-h 2:1] vs [MSC]	MSC:gProcessedSignal(raw)	MSC/P/C-h 2:1:gProcessedSignal(raw)	MSC:gProcessedSignal(normalized)	MSC/P/C-h 2:1:gProcessedSignal(normalized)	MSC:gFEFlags	MSC/P/C-h 2:1:gFEFlags	ControlType	PrimaryAccession	RefSeqAccession	GenbankAccession	UniGeneID	EntrezGeneID	GeneSymbol	GeneName	EnsemblID	TIGRID	GO	Description	GenomicCoordinates	Cytoband	Sequence_x000D_
A_33_P3258467	3.17095	3.17095	1.66491	up	8192.5	16674.5	1.9672	3.63211	Detected	Detected	0	NM_178313	NM_178313	NM_178313	Hs.503178	6711	SPTBN1	"spectrin, beta, non-erythrocytic 1"	ENST00000333896	THC2552645	GO:0000281(cytokinesis after mitosis)|GO:0003779(actin binding)|GO:0005200(structural constituent of cytoskeleton)|GO:0005515(protein binding)|GO:0005516(calmodulin binding)|GO:0005543(phospholipid binding)|GO:0005730(nucleolus)|GO:0005737(cytoplasm)|GO:0005829(cytosol)|GO:0007009(plasma membrane organization)|GO:0007182(common-partner SMAD protein phosphorylation)|GO:0007184(SMAD protein import …	"Homo sapiens spectrin, beta, non-erythrocytic 1 (SPTBN1), transcript variant 2, mRNA [NM_178313]"	chr2:54889385-54889444	hs|2p16.2	GTGTGCTGTCTGTTGGCATGCTTAAAGCACATGTCCATTAAAATTCATTTTGTTCCTTTT
A_23_P20022	3.1045	3.1045	1.63436	up	41679.8	83054.9	4.31417	5.94854	Detected	Detected	0	NM_013332	NM_013332	NM_013332	Hs.706124	29923	HILPDA	hypoxia inducible lipid droplet-associated	ENST00000466473	THC2461902	GO:0001819(positive regulation of cytokine production)|GO:0005102(receptor binding)|GO:0005515(protein binding)|GO:0005615(extracellular space)|GO:0005811(lipid particle)|GO:0006950(response to stress)|GO:0008284(positive regulation of cell proliferation)|GO:0009986(cell surface)|GO:0010884(positive regulation of lipid storage)|GO:0016021(integral to membrane)|GO:0030141(secretory granule)|GO:003…	"Homo sapiens hypoxia inducible lipid droplet-associated (HILPDA), transcript variant 1, mRNA [NM_013332]"	chr7:128098381-128098440	hs|7q32.1	GGATGCCAAAGCCTGCTCAAGTTATGGACATTGTGGCCACCATGTGGCTTAAATGATTTT
A_33_P3349395	2.87841	2.87841	1.52527	up	154.023	284.567	-3.76589	-2.24061	Detected	Detected	0	XM_006724079	XM_006724079	XM_006724079	Hs.658723	27443	CECR2	"cat eye syndrome chromosome region, candidate 2"		THC2686850	GO:0000910(cytokinesis)|GO:0001842(neural fold formation)|GO:0001843(neural tube closure)|GO:0005515(protein binding)|GO:0005634(nucleus)|GO:0005719(nuclear euchromatin)|GO:0006309(apoptotic DNA fragmentation)|GO:0007010(cytoskeleton organization)|GO:0007338(single fertilization)|GO:0016192(vesicle-mediated transport)|GO:0043044(ATP-dependent chromatin remodeling)|GO:0060122(inner ear receptor st…	"PREDICTED: Homo sapiens cat eye syndrome chromosome region, candidate 2 (CECR2), transcript variant X3, mRNA [XM_006724079]"	chr22:18019144-18019203	hs|22q11.21	TCTGCAATATCAAAGTAGAAATGGCTCTTTCTGAACATCACACTCCGGGGCCTGTTGTGA
A_33_P3234043	3.28142	3.28142	1.71432	up	44.2292	93.1577	-5.56596	-3.85164	Not Detected	Detected	0	ENST00000471755		AK291620	Hs.1274	649	BMP1	bone morphogenetic protein 1	ENST00000471755	THC2477847	GO:0001501(skeletal system development)|GO:0001502(cartilage condensation)|GO:0001503(ossification)|GO:0004222(metalloendopeptidase activity)|GO:0005125(cytokine activity)|GO:0005509(calcium ion binding)|GO:0005576(extracellular region)|GO:0005578(proteinaceous extracellular matrix)|GO:0005615(extracellular space)|GO:0005794(Golgi apparatus)|GO:0006508(proteolysis)|GO:0007275(multicellular organi…	bone morphogenetic protein 1 [Source:HGNC Symbol;Acc:HGNC:1067] [ENST00000471755]	chr8:22053703-22053762	hs|8p21.3	ATCTACAGGTTGGGAAACCCCTGTTGTGGGACAGACACTGTTTCCGCCTCTCCACGCATG
A_33_P3295313	15.6284	15.6284	3.9661	up	12.0812	121.191	-7.4382	-3.4721	Not Detected	Detected	0	NM_000139	NM_000139	NM_000139	Hs.386748	2206	MS4A2	"membrane-spanning 4-domains, subfamily A, member 2"	ENST00000440896	THC2482839	GO:0005768(endosome)|GO:0005886(plasma membrane)|GO:0005887(integral to plasma membrane)|GO:0006954(inflammatory response)|GO:0006955(immune response)|GO:0007202(activation of phospholipase C activity)|GO:0007205(protein kinase C-activating G-protein coupled receptor signaling pathway)|GO:0009897(external side of plasma membrane)|GO:0019767(IgE receptor activity)|GO:0019863(IgE binding)|GO:001990…	"Homo sapiens membrane-spanning 4-domains, subfamily A, member 2 (MS4A2), transcript variant 1, mRNA [NM_000139]"	chr11:59861439-59861498	hs|11q12.1	AATTGTAGTGATGATGCTGTTTCTCACCATTCTGGGACTTGGTAGTGCTGTGTCACTCAC
A_23_P420196	3.23916	3.23916	1.69562	up	3206.1	6665.87	0.613716	2.30934	Detected	Detected	0	NM_003745	NM_003745	NM_003745	Hs.50640	8651	SOCS1	suppressor of cytokine signaling 1	ENST00000332029	THC2666012	GO:0001932(regulation of protein phosphorylation)|GO:0004860(protein kinase inhibitor activity)|GO:0005159(insulin-like growth factor receptor binding)|GO:0005515(protein binding)|GO:0005634(nucleus)|GO:0005737(cytoplasm)|GO:0005829(cytosol)|GO:0006469(negative regulation of protein kinase activity)|GO:0007259(JAK-STAT cascade)|GO:0016023(cytoplasmic membrane-bounded vesicle)|GO:0016567(protein u…	"Homo sapiens suppressor of cytokine signaling 1 (SOCS1), mRNA [NM_003745]"	chr16:11348443-11348384	hs|16p13.13	ACCTGAACTCGCACCTCCTACCTCTTCATGTTTACATATACCCAGTATCTTTGCACAAAC
A_23_P24077	3.05771	3.05771	1.61245	up	838.446	1645.58	-1.32131	0.29114	Detected	Detected	0	NM_022153	NM_022153	NM_022153	Hs.47382	64115	C10orf54	chromosome 10 open reading frame 54	ENST00000394957	THC2494273	"GO:0002725(negative regulation of T cell cytokine production)|GO:0009897(external side of plasma membrane)|GO:0016021(integral to membrane)|GO:0030509(BMP signaling pathway)|GO:0030513(positive regulation of BMP signaling pathway)|GO:0048863(stem cell differentiation)|GO:2000562(negative regulation of CD4-positive, alpha-beta T cell proliferation)|GO:2000738(positive regulation of stem cell diff…	"Homo sapiens chromosome 10 open reading frame 54 (C10orf54), mRNA [NM_022153]"	chr10:73510437-73510378	hs|10q22.1	AGATCTGTCAACAGGTTAAGTCAATCTGGGGCTTCCACTGCCTGCATTCCAGTCCCCAGA
A_33_P3221783	6.89895	6.89895	2.78638	up	79.0134	349.889	-4.72886	-1.94249	Detected	Detected	0	NM_033035	NM_033035	NM_033035	Hs.389874	85480	TSLP	thymic stromal lymphopoietin		THC2474858	GO:0005125(cytokine activity)|GO:0005615(extracellular space)	"Homo sapiens thymic stromal lymphopoietin (TSLP), transcript variant 1, mRNA [NM_033035]"	chr5:110413656-110413715	hs|5q22.1	GACTAGTATAGTATACGGTCAGTTATGTCAATGTTTCATGGTCAATAAAAAGGAAGTTGC
A_33_P3391796	3.20779	3.20779	1.68158	up	1079.73	2223.15	-0.956434	0.725147	Detected	Detected	0	NM_005450	NM_005450	NM_005450	Hs.248201	9241	NOG	noggin	ENST00000332822	THC2481541	GO:0000122(negative regulation of transcription from RNA polymerase II promoter)|GO:0001501(skeletal system development)|GO:0001649(osteoblast differentiation)|GO:0001701(in utero embryonic development)|GO:0001706(endoderm formation)|GO:0001707(mesoderm formation)|GO:0001837(epithelial to mesenchymal transition)|GO:0001839(neural plate morphogenesis)|GO:0001843(neural tube closure)|GO:0005515(pro…	"Homo sapiens noggin (NOG), mRNA [NM_005450]"	chr17:54672456-54672515	hs|17q22	GCACTGTTTAACTGTGTAGGAATGTATATGTGTGTGTATATACGGTCCCAGTTTTAATTT
A_23_P200222	3.03642	3.03642	1.60237	up	1339.72	2611.11	-0.645166	0.957205	Detected	Detected	0	NM_033300	NM_033300	NM_033300	Hs.280387	7804	LRP8	"low density lipoprotein receptor-related protein 8, apolipoprotein e receptor"	ENST00000306052	THC2470553	"GO:0000122(negative regulation of transcription from RNA polymerase II promoter)|GO:0001523(retinoid metabolic process)|GO:0004888(transmembrane signaling receptor activity)|GO:0005509(calcium ion binding)|GO:0005515(protein binding)|GO:0005576(extracellular region)|GO:0005875(microtubule associated complex)|GO:0005886(plasma membrane)|GO:0005901(caveola)|GO:0006508(proteolysis)|GO:0006629(lipid…	"Homo sapiens low density lipoprotein receptor-related protein 8, apolipoprotein e receptor (LRP8), transcript variant 2, mRNA [NM_033300]"	chr1:53711278-53711219	hs|1p32.3	TATTTATGTTCACACAGGAATTTGGTTTACTGCTTTGTAAATAAAAGGGAAAACTCCGGG
A_23_P35871	3.39837	3.39837	1.76484	up	52.2055	113.876	-5.32676	-3.56192	Not Detected	Detected	0	NM_024680	NM_024680	NM_024680	Hs.523526	79733	E2F8	E2F transcription factor 8	ENST00000620009	THC2621198	"GO:0000122(negative regulation of transcription from RNA polymerase II promoter)|GO:0000978(RNA polymerase II core promoter proximal region sequence-specific DNA binding)|GO:0001047(core promoter binding)|GO:0001078(RNA polymerase II core promoter proximal region sequence-specific DNA binding transcription factor activity involved in negative regulation of transcription)|GO:0001890(placenta deve…	"Homo sapiens E2F transcription factor 8 (E2F8), transcript variant 1, mRNA [NM_024680]"	chr11:19245734-19245675	hs|11p15.1	ATCTGTTGTTGCAGTGTATCTTTTTGTAAAGTTTGCAACAATCCTCAATCAAGTCTATGG
A_33_P3317005	8.66679	-8.66679	-3.1155	down	187.675	13.8994	-3.4808	-6.5963	Detected	Not Detected	0	NM_000578	NM_000578	NM_000578	Hs.591607	6556	SLC11A1	"solute carrier family 11 (proton-coupled divalent metal ion transporter), member 1"	ENST00000483487	THC2566353	"GO:0000060(protein import into nucleus, translocation)|GO:0001818(negative regulation of cytokine production)|GO:0001819(positive regulation of cytokine production)|GO:0002309(T cell proliferation involved in immune response)|GO:0002369(T cell cytokine production)|GO:0002606(positive regulation of dendritic cell antigen processing and presentation)|GO:0002827(positive regulation of T-helper 1 ty…	"Homo sapiens solute carrier family 11 (proton-coupled divalent metal ion transporter), member 1 (SLC11A1), mRNA [NM_000578]"	chr2:219249017-219249076	hs|2q35	ATGAGCATTGCTTTCCTGGACCCAGGAAACATCGAGTCAGATCTTCAGGCTGGCGCCGTG
A_24_P173124	5.57228	-5.57228	-2.47827	down	1642.72	189.225	-0.351012	-2.82928	Detected	Detected	0	NM_144997	NM_144997	NM_144997	Hs.31652	201163	FLCN	folliculin	ENST00000285071	THC2473570	GO:0000122(negative regulation of transcription from RNA polymerase II promoter)|GO:0001701(in utero embryonic development)|GO:0001932(regulation of protein phosphorylation)|GO:0001934(positive regulation of protein phosphorylation)|GO:0005515(protein binding)|GO:0005634(nucleus)|GO:0005737(cytoplasm)|GO:0005886(plasma membrane)|GO:0007043(cell-cell junction assembly)|GO:0010629(negative regulati…	"Homo sapiens folliculin (FLCN), transcript variant 1, mRNA [NM_144997]"	chr17:17116193-17116134	hs|17p11.2	GCTGCTTTCAACATTTACGTTTGGTTACAGTTAACTATTTTCGGAGTGTGGTGATTGAAG
A_33_P3246833	5.27556	-5.27556	-2.39932	down	3773.01	459.057	0.848611	-1.55071	Detected	Detected	0	NM_173843	NM_173843	NM_173843	Hs.81134	3557	IL1RN	interleukin 1 receptor antagonist	ENST00000259206	THC2498493	"GO:0001660(fever generation)|GO:0001960(negative regulation of cytokine-mediated signaling pathway)|GO:0002439(chronic inflammatory response to antigenic stimulus)|GO:0005125(cytokine activity)|GO:0005149(interleukin-1 receptor binding)|GO:0005150(interleukin-1, Type I receptor binding)|GO:0005151(interleukin-1, Type II receptor binding)|GO:0005152(interleukin-1 receptor antagonist activity)|GO:…	"Homo sapiens interleukin 1 receptor antagonist (IL1RN), transcript variant 4, mRNA [NM_173843]"	chr2:113891531-113891590	hs|2q13	TGCAAAGTTCCCTACTTCCTGTGACTTCAGCTCTGTTTTACAATAAAATCTTGAAAATGC
A_23_P210886	3.22092	-3.22092	-1.68747	down	229.825	45.7999	-3.1885	-4.87597	Detected	Not Detected	0	NM_138578	NM_138578	NM_138578	Hs.516966	598	BCL2L1	BCL2-like 1	ENST00000307677	THC2507989	"GO:0000910(cytokinesis)|GO:0001541(ovarian follicle development)|GO:0001701(in utero embryonic development)|GO:0001836(release of cytochrome c from mitochondria)|GO:0005515(protein binding)|GO:0005634(nucleus)|GO:0005730(nucleolus)|GO:0005737(cytoplasm)|GO:0005739(mitochondrion)|GO:0005741(mitochondrial outer membrane)|GO:0005743(mitochondrial inner membrane)|GO:0005759(mitochondrial matrix)|GO:…	"Homo sapiens BCL2-like 1 (BCL2L1), transcript variant 1, mRNA [NM_138578]"	chr20:30253383-30253324	hs|20q11.21	GAACCTCTTCCCCAGAAAGGAGACTAGATTGCCTTTGTTTTGATGTTTGTGGCCTCAGAA
A_24_P45476	3.13105	-3.13105	-1.64665	down	133.37	27.341	-3.9736	-5.62025	Detected	Not Detected	0	NM_002995	NM_002995	NM_002995	Hs.546295	6375	XCL1	chemokine (C motif) ligand 1	ENST00000367818	THC2476442	"GO:0001916(positive regulation of T cell mediated cytotoxicity)|GO:0002690(positive regulation of leukocyte chemotaxis)|GO:0002725(negative regulation of T cell cytokine production)|GO:0002726(positive regulation of T cell cytokine production)|GO:0002826(negative regulation of T-helper 1 type immune response)|GO:0005576(extracellular region)|GO:0005615(extracellular space)|GO:0006955(immune resp…	"Homo sapiens chemokine (C motif) ligand 1 (XCL1), mRNA [NM_002995]"	chr1:168550524-168550583	hs|1q24.2	AGTTTATACTCACCTTTTATGAAAGCACTGCATGAATAAAATTATTCCTTTGTATTTTTA
A_23_P32233	2.96434	-2.96434	-1.56771	down	1116.19	241.689	-0.908522	-2.47623	Detected	Detected	0	NM_004235	NM_004235	NM_004235	Hs.376206	9314	KLF4	Kruppel-like factor 4 (gut)	ENST00000610832	NP1155361	"GO:0000122(negative regulation of transcription from RNA polymerase II promoter)|GO:0000790(nuclear chromatin)|GO:0000987(core promoter proximal region sequence-specific DNA binding)|GO:0001010(sequence-specific DNA binding transcription factor recruiting transcription factor activity)|GO:0001077(RNA polymerase II core promoter proximal region sequence-specific DNA binding transcription factor a…	"Homo sapiens Kruppel-like factor 4 (gut) (KLF4), mRNA [NM_004235]"	chr9:110248108-110248049	hs|9q31.2	CGTTCCAGTGCCAAAAATGCGACCGAGCATTTTCCAGGTCGGACCACCTCGCCTTACACA
A_23_P70213	2.95517	-2.95517	-1.56324	down	321.2	69.7654	-2.70556	-4.2688	Detected	Not Detected	0	NM_000038	NM_000038	NM_000038	Hs.158932	324	APC	adenomatous polyposis coli	ENST00000508376	THC2468407	GO:0000281(cytokinesis after mitosis)|GO:0000776(kinetochore)|GO:0001822(kidney development)|GO:0001942(hair follicle development)|GO:0005515(protein binding)|GO:0005634(nucleus)|GO:0005654(nucleoplasm)|GO:0005737(cytoplasm)|GO:0005813(centrosome)|GO:0005829(cytosol)|GO:0005881(cytoplasmic microtubule)|GO:0005886(plasma membrane)|GO:0005913(cell-cell adherens junction)|GO:0005923(tight junction)|…	"Homo sapiens adenomatous polyposis coli (APC), transcript variant 3, mRNA [NM_000038]"	chr5:112180822-112180881	hs|5q22.2	AACAATTGAAGAAGACTGTTGCCACTTAACCATTCCATGCGTTGGCACTTATCTATTCCT
A_23_P2801	2.92655	-2.92655	-1.5492	down	4553.27	998.651	1.1198	-0.429405	Detected	Detected	0	NM_172373	NM_172373	NM_172373	Hs.135646	1997	ELF1	E74-like factor 1 (ets domain transcription factor)	ENST00000239882	THC2789053	"GO:0000978(RNA polymerase II core promoter proximal region sequence-specific DNA binding)|GO:0000981(sequence-specific DNA binding RNA polymerase II transcription factor activity)|GO:0001077(RNA polymerase II core promoter proximal region sequence-specific DNA binding transcription factor activity involved in positive regulation of transcription)|GO:0001817(regulation of cytokine production)|GO:…	"Homo sapiens E74-like factor 1 (ets domain transcription factor) (ELF1), transcript variant 1, mRNA [NM_172373]"	chr13:41506984-41506925	hs|13q14.11	TTAAAGCATCAGCCTAAGAATGGCACTCCCACTAACTAGCCATGTAATCTTGACCTCTTT
A_23_P160336	4.45796	-4.45796	-2.15638	down	242.498	34.9156	-3.11106	-5.26744	Detected	Not Detected	0	NM_020997	NM_020997	NM_020997	Hs.656214	10637	LEFTY1	left-right determination factor 1	ENST00000272134	THC2619243	GO:0000122(negative regulation of transcription from RNA polymerase II promoter)|GO:0003007(heart morphogenesis)|GO:0005125(cytokine activity)|GO:0005160(transforming growth factor beta receptor binding)|GO:0005615(extracellular space)|GO:0007179(transforming growth factor beta receptor signaling pathway)|GO:0007368(determination of left/right symmetry)|GO:0008083(growth factor activity)|GO:00108…	"Homo sapiens left-right determination factor 1 (LEFTY1), mRNA [NM_020997]"	chr1:226074167-226074108	hs|1q42.12	TGGAGATACTGTAACCTGAGGGCAGAAAGCCCAATGTGTCATTGTTTACTTGTCCTGTCA
A_23_P54144	4.60018	-4.60018	-2.20169	down	126.209	17.6101	-4.05322	-6.25491	Detected	Not Detected	0	NM_001202	NM_001202	NM_001202	Hs.68879	652	BMP4	bone morphogenetic protein 4	ENST00000558984	THC2563105	GO:0000122(negative regulation of transcription from RNA polymerase II promoter)|GO:0000186(activation of MAPKK activity)|GO:0001649(osteoblast differentiation)|GO:0001657(ureteric bud development)|GO:0001658(branching involved in ureteric bud morphogenesis)|GO:0001822(kidney development)|GO:0001823(mesonephros development)|GO:0001843(neural tube closure)|GO:0001934(positive regulation of protein…	"Homo sapiens bone morphogenetic protein 4 (BMP4), transcript variant 1, mRNA [NM_001202]"	chr14:54417377-54417318	hs|14q22.2	GGACACGAGACTGGTCCACCACAATGTGACACGGTGGGAAACTTTTGATGTGAGCCCTGC
A_21_P0009555	5.30457	-5.30457	-2.40724	down	149.54	18.0948	-3.8085	-6.21574	Detected	Not Detected	0	ENST00000262160				4087	SMAD2	SMAD family member 2	ENST00000262160		"GO:0000122(negative regulation of transcription from RNA polymerase II promoter)|GO:0000790(nuclear chromatin)|GO:0000978(RNA polymerase II core promoter proximal region sequence-specific DNA binding)|GO:0001077(RNA polymerase II core promoter proximal region sequence-specific DNA binding transcription factor activity involved in positive regulation of transcription)|GO:0001657(ureteric bud deve…	SMAD family member 2 [Source:HGNC Symbol;Acc:HGNC:6768] [ENST00000262160]	chr18:45347378-45347319	hs|18q21.1	CTCTTTCAATTTTATTAAGACCAGATCCTTAAAAAGAACCTTGTTCTAACATTGGGGACC

## Sheet: inflammation respones
ProbeName	FC (abs) [MSC/P/C-h 2:1] vs [MSC]	FC [MSC/P/C-h 2:1] vs [MSC]	Log FC [MSC/P/C-h 2:1] vs [MSC]	Regulation [MSC/P/C-h 2:1] vs [MSC]	MSC:gProcessedSignal(raw)	MSC/P/C-h 2:1:gProcessedSignal(raw)	MSC:gProcessedSignal(normalized)	MSC/P/C-h 2:1:gProcessedSignal(normalized)	MSC:gFEFlags	MSC/P/C-h 2:1:gFEFlags	ControlType	PrimaryAccession	RefSeqAccession	GenbankAccession	UniGeneID	EntrezGeneID	GeneSymbol	GeneName	EnsemblID	TIGRID	GO	Description	GenomicCoordinates	Cytoband	Sequence_x000D_
A_23_P38537	3.37339	3.37339	1.7542	up	209.948	454.597	-3.319	-1.5648	Detected	Detected	0	NM_005557	NM_005557	NM_005557	Hs.655160	3868	KRT16	"keratin 16, type I"	ENST00000301653	THC2507751	GO:0002009(morphogenesis of an epithelium)|GO:0005200(structural constituent of cytoskeleton)|GO:0005515(protein binding)|GO:0005634(nucleus)|GO:0005856(cytoskeleton)|GO:0005882(intermediate filament)|GO:0006954(inflammatory response)|GO:0007010(cytoskeleton organization)|GO:0007568(aging)|GO:0008283(cell proliferation)|GO:0008544(epidermis development)|GO:0030216(keratinocyte differentiation)|GO…	"Homo sapiens keratin 16, type I (KRT16), mRNA [NM_005557]"	chr17:39767364-39767216	hs|17q21.2	CAGAGAAAAACCGCAGAGACGCTGAGACCTGGTTCCTGAGCAAGACCGAGGAGCTGAACA
A_23_P97112	7.45728	7.45728	2.89865	up	23.6717	113.307	-6.4678	-3.56915	Not Detected	Detected	0	NM_000450	NM_000450	NM_000450	Hs.82848	6401	SELE	selectin E	ENST00000333360	THC2470435	GO:0002092(positive regulation of receptor internalization)|GO:0002523(leukocyte migration involved in inflammatory response)|GO:0002687(positive regulation of leukocyte migration)|GO:0004888(transmembrane signaling receptor activity)|GO:0005515(protein binding)|GO:0005615(extracellular space)|GO:0005886(plasma membrane)|GO:0005901(caveola)|GO:0005905(coated pit)|GO:0006954(inflammatory response)…	"Homo sapiens selectin E (SELE), mRNA [NM_000450]"	chr1:169692108-169692049	hs|1q24.2	GATGTGATAAGGATCAGAACAGCAGAGGTTCTTTTAAAGGGGCAGAAAAACTCTGGGAAA
A_23_P17065	2.86939	2.86939	1.52074	up	21770.1	40095.6	3.37717	4.89792	Detected	Detected	0	NM_004591	NM_004591	NM_004591	Hs.75498	6364	CCL20	chemokine (C-C motif) ligand 20	ENST00000473642	THC2470856	GO:0005515(protein binding)|GO:0005576(extracellular region)|GO:0005615(extracellular space)|GO:0006935(chemotaxis)|GO:0006954(inflammatory response)|GO:0006955(immune response)|GO:0007165(signal transduction)|GO:0007267(cell-cell signaling)|GO:0008009(chemokine activity)|GO:0042060(wound healing)|GO:0042742(defense response to bacterium)|GO:0050726(positive regulation of interleukin-1 alpha bios…	"Homo sapiens chemokine (C-C motif) ligand 20 (CCL20), transcript variant 1, mRNA [NM_004591]"	chr2:228681100-228681836	hs|2q36.3	GTAAAAAAGTCAAGAACATGTAAAAACTGTGGCTTTTCTGGAATGGAATTGGACATAGCC
A_33_P3250443	4.10882	4.10882	2.03872	up	59.4129	156.691	-5.14018	-3.10146	Not Detected	Detected	0	NM_207581	NM_207581	NM_207581	Hs.497987	405753	DUOXA2	dual oxidase maturation factor 2	ENST00000491993	THC2641623	GO:0005789(endoplasmic reticulum membrane)|GO:0015031(protein transport)|GO:0016021(integral to membrane)|GO:0042743(hydrogen peroxide metabolic process)|GO:0050727(regulation of inflammatory response)|GO:2000609(regulation of thyroid hormone generation)	"Homo sapiens dual oxidase maturation factor 2 (DUOXA2), mRNA [NM_207581]"	chr15:45410227-45410286	hs|15q21.1	TCGGACATCCGCAGGCACCAGGGAAAGTCTCCTGGGGCGATCTGTAAATAAACCTTTTTT
A_21_P0012283	3.11111	3.11111	1.63743	up	148.899	297.342	-3.81469	-2.17726	Detected	Detected	0	NM_001288833	NM_001288833	NM_001288833	Hs.645535	2678	GGT1	gamma-glutamyltransferase 1	ENST00000453783	THC2578536	GO:0002682(regulation of immune system process)|GO:0003840(gamma-glutamyltransferase activity)|GO:0005515(protein binding)|GO:0005615(extracellular space)|GO:0005886(plasma membrane)|GO:0006508(proteolysis)|GO:0006520(cellular amino acid metabolic process)|GO:0006536(glutamate metabolic process)|GO:0006691(leukotriene metabolic process)|GO:0006749(glutathione metabolic process)|GO:0006750(glutath…	"Homo sapiens gamma-glutamyltransferase 1 (GGT1), transcript variant 6, mRNA [NM_001288833]"	chr22:25007149-25007208	hs|22q11.23	ACAACCATGTGTACACCAGGGCTGCCGTGGCCGCGGATGCCAAGCAGTGCTTGGAGATTG
A_24_P923251	3.27469	3.27469	1.71136	up	3901.17	8199.99	0.896805	2.60817	Detected	Detected	0	NM_198951	NM_198951	NM_198951	Hs.517033	7052	TGM2	transglutaminase 2	ENST00000468262	THC2659478	GO:0001974(blood vessel remodeling)|GO:0003810(protein-glutamine gamma-glutamyltransferase activity)|GO:0005515(protein binding)|GO:0005525(GTP binding)|GO:0005739(mitochondrion)|GO:0005829(cytosol)|GO:0005886(plasma membrane)|GO:0005925(focal adhesion)|GO:0018153(isopeptide cross-linking via N6-(L-isoglutamyl)-L-lysine)|GO:0019904(protein domain specific binding)|GO:0032471(reduction of endoplas…	"Homo sapiens transglutaminase 2 (TGM2), transcript variant 2, mRNA [NM_198951]"	chr20:36766505-36766446	hs|20q11.23	TGTGTTCCTGGAGCATTTGTTGACCGCCAACTGACATCATGCTAGGTAGTGACCTAACCA
A_24_P38290	11.663	11.663	3.54386	up	29.599	221.582	-6.14541	-2.60154	Not Detected	Detected	0	NM_003182	NM_003182	NM_003182	Hs.2563	6863	TAC1	"tachykinin, precursor 1"	ENST00000350485	THC2473830	"GO:0002675(positive regulation of acute inflammatory response)|GO:0005515(protein binding)|GO:0005576(extracellular region)|GO:0005615(extracellular space)|GO:0005886(plasma membrane)|GO:0006954(inflammatory response)|GO:0007204(elevation of cytosolic calcium ion concentration)|GO:0007217(tachykinin receptor signaling pathway)|GO:0007218(neuropeptide signaling pathway)|GO:0007267(cell-cell signa…	"Homo sapiens tachykinin, precursor 1 (TAC1), transcript variant beta, mRNA [NM_003182]"	chr7:97369454-97369513	hs|7q21.3	CTCAACAAAGCACAGTGTTAAATGAAATTGTAAAACCTGTCAATGATACAGTCCCTAAAG
A_23_P311632	11.1869	11.1869	3.48374	up	32.4781	233.211	-6.01149	-2.52775	Not Detected	Detected	0	NM_138329	NM_138329	NM_138329	Hs.352611	171389	NLRP6	"NLR family, pyrin domain containing 6"	ENST00000312165	THC2604040	GO:0005000(vasopressin receptor activity)|GO:0005524(ATP binding)|GO:0005737(cytoplasm)|GO:0005886(plasma membrane)|GO:0007186(G-protein coupled receptor signaling pathway)|GO:0009617(response to bacterium)|GO:0010506(regulation of autophagy)|GO:0031965(nuclear membrane)|GO:0034122(negative regulation of toll-like receptor signaling pathway)|GO:0042060(wound healing)|GO:0043124(negative regulatio…	"Homo sapiens NLR family, pyrin domain containing 6 (NLRP6), transcript variant 1, mRNA [NM_138329]"	chr11:285183-285242	hs|11p15.5	TGAGCGAGCAGTCACTACAGGAGCTTCAGGCTGTGAAGAGAGCAAAGCCGGATCTGGTCA
A_33_P3295313	15.6284	15.6284	3.9661	up	12.0812	121.191	-7.4382	-3.4721	Not Detected	Detected	0	NM_000139	NM_000139	NM_000139	Hs.386748	2206	MS4A2	"membrane-spanning 4-domains, subfamily A, member 2"	ENST00000440896	THC2482839	GO:0005768(endosome)|GO:0005886(plasma membrane)|GO:0005887(integral to plasma membrane)|GO:0006954(inflammatory response)|GO:0006955(immune response)|GO:0007202(activation of phospholipase C activity)|GO:0007205(protein kinase C-activating G-protein coupled receptor signaling pathway)|GO:0009897(external side of plasma membrane)|GO:0019767(IgE receptor activity)|GO:0019863(IgE binding)|GO:001990…	"Homo sapiens membrane-spanning 4-domains, subfamily A, member 2 (MS4A2), transcript variant 1, mRNA [NM_000139]"	chr11:59861439-59861498	hs|11q12.1	AATTGTAGTGATGATGCTGTTTCTCACCATTCTGGGACTTGGTAGTGCTGTGTCACTCAC
A_23_P151778	12.5721	12.5721	3.65215	up	12.1525	98.0663	-7.42971	-3.77756	Not Detected	Detected	0	NM_001836	NM_001836	NM_001836	Hs.135626	1215	CMA1	"chymase 1, mast cell"	ENST00000250378	THC2480549	GO:0002003(angiotensin maturation)|GO:0004252(serine-type endopeptidase activity)|GO:0005576(extracellular region)|GO:0005615(extracellular space)|GO:0005622(intracellular)|GO:0006508(proteolysis)|GO:0008236(serine-type peptidase activity)|GO:0016485(protein processing)|GO:0022617(extracellular matrix disassembly)|GO:0030198(extracellular matrix organization)|GO:0030901(midbrain development)|GO:0…	"Homo sapiens chymase 1, mast cell (CMA1), mRNA [NM_001836]"	chr14:24975737-24975678	hs|14q12	AAGCAATTCCGTCATCCAAAATATAACACTTCTACTCTTCACCACGATATCATGTTACTA
A_23_P207456	5.84993	5.84993	2.54842	up	128.978	484.299	-4.02191	-1.47349	Detected	Detected	0	NM_005623	NM_005623	NM_005623	Hs.271387	6355	CCL8	chemokine (C-C motif) ligand 8	ENST00000394620	THC2474860	GO:0004672(protein kinase activity)|GO:0005615(extracellular space)|GO:0006468(protein phosphorylation)|GO:0006816(calcium ion transport)|GO:0006874(cellular calcium ion homeostasis)|GO:0006887(exocytosis)|GO:0006935(chemotaxis)|GO:0006954(inflammatory response)|GO:0006955(immune response)|GO:0007165(signal transduction)|GO:0007267(cell-cell signaling)|GO:0008009(chemokine activity)|GO:0008201(he…	"Homo sapiens chemokine (C-C motif) ligand 8 (CCL8), mRNA [NM_005623]"	chr17:32648102-32648161	hs|17q12	GTTTTAACTCTATCTGTCATACATCCTAGTGAATGTAAAATGCAAAATCCTGGTGATGTG
A_33_P3258141	3.07079	3.07079	1.61861	up	1142.86	2252.63	-0.874453	0.744155	Detected	Detected	0	NM_001278	NM_001278	NM_001278	Hs.198998	1147	CHUK	conserved helix-loop-helix ubiquitous kinase	ENST00000590930	THC2633242	"GO:0002011(morphogenesis of an epithelial sheet)|GO:0002224(toll-like receptor signaling pathway)|GO:0002755(MyD88-dependent toll-like receptor signaling pathway)|GO:0002756(MyD88-independent toll-like receptor signaling pathway)|GO:0003009(skeletal muscle contraction)|GO:0004672(protein kinase activity)|GO:0005515(protein binding)|GO:0005524(ATP binding)|GO:0005654(nucleoplasm)|GO:0005737(cytop…	"Homo sapiens conserved helix-loop-helix ubiquitous kinase (CHUK), mRNA [NM_001278]"	chr10:101948251-101948192	hs|10q24.31	CAGAGAAAGGACTGTGGACCTCTATCATCTGCTAAGTAATTTAGAAGATATTATTTGTCT
A_33_P3377151	3.5296	3.5296	1.8195	up	51.5703	116.835	-5.34442	-3.52491	Not Detected	Detected	0	NM_006274	NM_006274	NM_006274	Hs.50002	6363	CCL19	chemokine (C-C motif) ligand 19	ENST00000378800	THC2470923	GO:0001768(establishment of T cell polarity)|GO:0001771(immunological synapse formation)|GO:0002407(dendritic cell chemotaxis)|GO:0002408(myeloid dendritic cell chemotaxis)|GO:0002606(positive regulation of dendritic cell antigen processing and presentation)|GO:0005576(extracellular region)|GO:0005615(extracellular space)|GO:0006874(cellular calcium ion homeostasis)|GO:0006954(inflammatory respon…	"Homo sapiens chemokine (C-C motif) ligand 19 (CCL19), mRNA [NM_006274]"	chr9:34690267-34690208	hs|9p13.3	ACATCGTGAGGAACTTCCACTACCTTCTCATCAAGGATGGCTGCAGGGTGCCTGCTGTAG
A_33_P3317005	8.66679	-8.66679	-3.1155	down	187.675	13.8994	-3.4808	-6.5963	Detected	Not Detected	0	NM_000578	NM_000578	NM_000578	Hs.591607	6556	SLC11A1	"solute carrier family 11 (proton-coupled divalent metal ion transporter), member 1"	ENST00000483487	THC2566353	"GO:0000060(protein import into nucleus, translocation)|GO:0001818(negative regulation of cytokine production)|GO:0001819(positive regulation of cytokine production)|GO:0002309(T cell proliferation involved in immune response)|GO:0002369(T cell cytokine production)|GO:0002606(positive regulation of dendritic cell antigen processing and presentation)|GO:0002827(positive regulation of T-helper 1 ty…	"Homo sapiens solute carrier family 11 (proton-coupled divalent metal ion transporter), member 1 (SLC11A1), mRNA [NM_000578]"	chr2:219249017-219249076	hs|2q35	ATGAGCATTGCTTTCCTGGACCCAGGAAACATCGAGTCAGATCTTCAGGCTGGCGCCGTG
A_33_P3246833	5.27556	-5.27556	-2.39932	down	3773.01	459.057	0.848611	-1.55071	Detected	Detected	0	NM_173843	NM_173843	NM_173843	Hs.81134	3557	IL1RN	interleukin 1 receptor antagonist	ENST00000259206	THC2498493	"GO:0001660(fever generation)|GO:0001960(negative regulation of cytokine-mediated signaling pathway)|GO:0002439(chronic inflammatory response to antigenic stimulus)|GO:0005125(cytokine activity)|GO:0005149(interleukin-1 receptor binding)|GO:0005150(interleukin-1, Type I receptor binding)|GO:0005151(interleukin-1, Type II receptor binding)|GO:0005152(interleukin-1 receptor antagonist activity)|GO:…	"Homo sapiens interleukin 1 receptor antagonist (IL1RN), transcript variant 4, mRNA [NM_173843]"	chr2:113891531-113891590	hs|2q13	TGCAAAGTTCCCTACTTCCTGTGACTTCAGCTCTGTTTTACAATAAAATCTTGAAAATGC
A_23_P212258	3.88084	-3.88084	-1.95637	down	194.014	32.089	-3.43287	-5.38924	Detected	Not Detected	0	NM_000893	NM_000893	NM_000893	Hs.77741	3827	KNG1	kininogen 1	ENST00000447445	THC2461956	"GO:0002576(platelet degranulation)|GO:0004869(cysteine-type endopeptidase inhibitor activity)|GO:0005102(receptor binding)|GO:0005515(protein binding)|GO:0005576(extracellular region)|GO:0005615(extracellular space)|GO:0005886(plasma membrane)|GO:0006939(smooth muscle contraction)|GO:0006954(inflammatory response)|GO:0007162(negative regulation of cell adhesion)|GO:0007204(elevation of cytosolic…	"Homo sapiens kininogen 1 (KNG1), transcript variant 2, mRNA [NM_000893]"	chr3:186457190-186459356	hs|3q27.3	AACCACTGGGAATGATCTCACTGATGAAAAGGCCTCCAGGTTTTTCACCTTTCCGATCAT
A_23_P121695	3.8728	-3.8728	-1.95338	down	89.7084	14.8681	-4.54572	-6.49909	Detected	Not Detected	0	NM_006419	NM_006419	NM_006419	Hs.100431	10563	CXCL13	chemokine (C-X-C motif) ligand 13	ENST00000286758	THC2465087	GO:0002467(germinal center formation)|GO:0002518(lymphocyte chemotaxis across high endothelial venule)|GO:0002544(chronic inflammatory response)|GO:0002920(regulation of humoral immune response)|GO:0005576(extracellular region)|GO:0005615(extracellular space)|GO:0006954(inflammatory response)|GO:0006955(immune response)|GO:0007166(cell surface receptor signaling pathway)|GO:0007186(G-protein coup…	"Homo sapiens chemokine (C-X-C motif) ligand 13 (CXCL13), mRNA [NM_006419]"	chr4:78532646-78532705	hs|4q21.1	CAAGAGGCAAAGGAATCCATGTAGTAGATATCCTCTGCTTAAAAACTCACTACGGAGGAG
A_33_P3322274	3.26821	-3.26821	-1.7085	down	1302.25	255.76	-0.686094	-2.3946	Detected	Detected	0	NM_001066	NM_001066	NM_001066	Hs.256278	7133	TNFRSF1B	"tumor necrosis factor receptor superfamily, member 1B"	ENST00000489921	NP861697	"GO:0005031(tumor necrosis factor-activated receptor activity)|GO:0005515(protein binding)|GO:0005576(extracellular region)|GO:0005634(nucleus)|GO:0005886(plasma membrane)|GO:0006954(inflammatory response)|GO:0006955(immune response)|GO:0007568(aging)|GO:0008630(DNA damage response, signal transduction resulting in induction of apoptosis)|GO:0016021(integral to membrane)|GO:0031625(ubiquitin prot…	"Homo sapiens tumor necrosis factor receptor superfamily, member 1B (TNFRSF1B), mRNA [NM_001066]"	chr1:12252992-12253051	hs|1p36.22	TATGGCCCCAGGGGCAGTACACTTACCCCAGCCAGTGTCCACACGATCCCAACACACGCA
A_24_P45476	3.13105	-3.13105	-1.64665	down	133.37	27.341	-3.9736	-5.62025	Detected	Not Detected	0	NM_002995	NM_002995	NM_002995	Hs.546295	6375	XCL1	chemokine (C motif) ligand 1	ENST00000367818	THC2476442	"GO:0001916(positive regulation of T cell mediated cytotoxicity)|GO:0002690(positive regulation of leukocyte chemotaxis)|GO:0002725(negative regulation of T cell cytokine production)|GO:0002726(positive regulation of T cell cytokine production)|GO:0002826(negative regulation of T-helper 1 type immune response)|GO:0005576(extracellular region)|GO:0005615(extracellular space)|GO:0006955(immune resp…	"Homo sapiens chemokine (C motif) ligand 1 (XCL1), mRNA [NM_002995]"	chr1:168550524-168550583	hs|1q24.2	AGTTTATACTCACCTTTTATGAAAGCACTGCATGAATAAAATTATTCCTTTGTATTTTTA
A_23_P1374	3.12261	-3.12261	-1.64275	down	78.6025	16.1572	-4.73638	-6.37914	Detected	Not Detected	0	NM_006257	NM_006257	NM_006257	Hs.498570	5588	PRKCQ	"protein kinase C, theta"	ENST00000263125	THC2471720	"GO:0001558(regulation of cell growth)|GO:0001772(immunological synapse)|GO:0004674(protein serine/threonine kinase activity)|GO:0004697(protein kinase C activity)|GO:0004842(ubiquitin-protein ligase activity)|GO:0005515(protein binding)|GO:0005524(ATP binding)|GO:0005829(cytosol)|GO:0005886(plasma membrane)|GO:0006355(regulation of transcription, DNA-dependent)|GO:0006468(protein phosphorylation…	"Homo sapiens protein kinase C, theta (PRKCQ), transcript variant 1, mRNA [NM_006257]"	chr10:6470247-6470188	hs|10p15.1	ACTGATCAACAGCATGGACCAGAATATGTTCAGGAACTTTTCCTTCATGAACCCCGGGAT
A_23_P32233	2.96434	-2.96434	-1.56771	down	1116.19	241.689	-0.908522	-2.47623	Detected	Detected	0	NM_004235	NM_004235	NM_004235	Hs.376206	9314	KLF4	Kruppel-like factor 4 (gut)	ENST00000610832	NP1155361	"GO:0000122(negative regulation of transcription from RNA polymerase II promoter)|GO:0000790(nuclear chromatin)|GO:0000987(core promoter proximal region sequence-specific DNA binding)|GO:0001010(sequence-specific DNA binding transcription factor recruiting transcription factor activity)|GO:0001077(RNA polymerase II core promoter proximal region sequence-specific DNA binding transcription factor a…	"Homo sapiens Kruppel-like factor 4 (gut) (KLF4), mRNA [NM_004235]"	chr9:110248108-110248049	hs|9q31.2	CGTTCCAGTGCCAAAAATGCGACCGAGCATTTTCCAGGTCGGACCACCTCGCCTTACACA
A_24_P83615	3.05358	-3.05358	-1.6105	down	665.945	139.983	-1.65363	-3.26413	Detected	Detected	0	NM_001033053	NM_001033053	NM_001033053	Hs.652273	22861	NLRP1	"NLR family, pyrin domain containing 1"	ENST00000613500	THC2479491	"GO:0005515(protein binding)|GO:0005524(ATP binding)|GO:0005622(intracellular)|GO:0005634(nucleus)|GO:0005829(cytosol)|GO:0006915(apoptotic process)|GO:0006919(activation of cysteine-type endopeptidase activity involved in apoptotic process)|GO:0008656(cysteine-type endopeptidase activator activity involved in apoptotic process)|GO:0019899(enzyme binding)|GO:0019904(protein domain specific bindin…	"Homo sapiens NLR family, pyrin domain containing 1 (NLRP1), transcript variant 5, mRNA [NM_001033053]"	chr17:5424946-5424887	hs|17p13.2	CTTCATTCCCGTCACCTCTGTGGTGTTGCTTTACCACCGCGTCCATCCTGAGGAAGTCAC
A_33_P3270429	2.16371	2.16371	1.11351	up	83.6467	116.17	-4.64665	-3.53315	Detected	Detected	0	NR_110524	NR_110524	NR_110524	Hs.37288	9975	NR1D2	"nuclear receptor subfamily 1, group D, member 2"	ENST00000383773		"GO:0001046(core promoter sequence-specific DNA binding)|GO:0003707(steroid hormone receptor activity)|GO:0004879(ligand-activated sequence-specific DNA binding RNA polymerase II transcription factor activity)|GO:0005515(protein binding)|GO:0005634(nucleus)|GO:0005654(nucleoplasm)|GO:0006355(regulation of transcription, DNA-dependent)|GO:0006367(transcription initiation from RNA polymerase II pro…	"Homo sapiens nuclear receptor subfamily 1, group D, member 2 (NR1D2), transcript variant 3, non-coding RNA [NR_110524]"	chr3:24004736-24004795	hs|3p24.2	AAATTTCACCAAAAACAGCAGTACCACACCATTTCCAGTTTAAACCATGAAGTCCTTTGA
A_23_P100386	3.0599	-3.0599	-1.61348	down	109.24	22.9151	-4.26153	-5.87502	Detected	Not Detected	0	NM_152456	NM_152456	NM_152456	Hs.461214	146433	IL34	interleukin 34	ENST00000429149	THC2769697	GO:0001934(positive regulation of protein phosphorylation)|GO:0005125(cytokine activity)|GO:0005157(macrophage colony-stimulating factor receptor binding)|GO:0005615(extracellular space)|GO:0006954(inflammatory response)|GO:0008083(growth factor activity)|GO:0008284(positive regulation of cell proliferation)|GO:0045087(innate immune response)	"Homo sapiens interleukin 34 (IL34), transcript variant 1, mRNA [NM_152456]"	chr16:70688562-70690551	hs|16q22.1	ACTTCAGTACATGAAACACTACTTCCCCATCAACTACAAGATCAGTGTGCCTTACGAGGG
A_33_P3303259	3.08045	-3.08045	-1.62314	down	496.268	103.407	-2.07791	-3.70105	Detected	Detected	0	NM_006437	NM_006437		Hs.744855	143	PARP4	"poly (ADP-ribose) polymerase family, member 4"	ENST00000446672	THC2466338	GO:0003677(DNA binding)|GO:0003950(NAD+ ADP-ribosyltransferase activity)|GO:0005515(protein binding)|GO:0005634(nucleus)|GO:0005737(cytoplasm)|GO:0005876(spindle microtubule)|GO:0006281(DNA repair)|GO:0006464(cellular protein modification process)|GO:0006471(protein ADP-ribosylation)|GO:0006810(transport)|GO:0006954(inflammatory response)|GO:0006974(response to DNA damage stimulus)|GO:0008219(cel…	"Homo sapiens poly (ADP-ribose) polymerase family, member 4 (PARP4), mRNA [NM_006437]"	chr13:25044112-25044053	hs|13q12.12	AAATATATCTTTCCTTTGGATGACAAGGCCGCTGTGTGTGGCTTCGAAGCCTTCATCAGT
A_33_P3303245	3.08622	-3.08622	-1.62584	down	68.6835	14.2848	-4.931	-6.55683	Detected	Not Detected	0	NM_001093772	NM_001093772	NM_001093772	Hs.479754	3815	KIT	v-kit Hardy-Zuckerman 4 feline sarcoma viral oncogene homolog	ENST00000288135	THC2618211	GO:0000187(activation of MAPK activity)|GO:0001541(ovarian follicle development)|GO:0001669(acrosomal vesicle)|GO:0002020(protease binding)|GO:0002318(myeloid progenitor cell differentiation)|GO:0002320(lymphoid progenitor cell differentiation)|GO:0002327(immature B cell differentiation)|GO:0002371(dendritic cell cytokine production)|GO:0002551(mast cell chemotaxis)|GO:0004713(protein tyrosine ki…	"Homo sapiens v-kit Hardy-Zuckerman 4 feline sarcoma viral oncogene homolog (KIT), transcript variant 2, mRNA [NM_001093772]"	chr4:55569965-55570024	hs|4q12	AGTTCAGCGAGAGTTAATGATTCTGGAGTGTTCATGTGTTATGCCAATAATACTTTTGGA
A_33_P3346461	3.1096	-3.1096	-1.63673	down	83.9324	17.325	-4.64173	-6.27846	Detected	Not Detected	0	ENST00000621666		AK311046	Hs.710305	4671	NAIP	"NLR family, apoptosis inhibitory protein"	ENST00000621666	THC2688955	GO:0004842(ubiquitin-protein ligase activity)|GO:0005515(protein binding)|GO:0005524(ATP binding)|GO:0005634(nucleus)|GO:0005737(cytoplasm)|GO:0005876(spindle microtubule)|GO:0006954(inflammatory response)|GO:0007399(nervous system development)|GO:0009966(regulation of signal transduction)|GO:0016323(basolateral plasma membrane)|GO:0016567(protein ubiquitination)|GO:0043027(cysteine-type endopept…	"NLR family, apoptosis inhibitory protein [Source:HGNC Symbol;Acc:HGNC:7634] [ENST00000621666]"	chr5:68919510-68919569	hs|5q13.2	CATTACATGTTTACATTATCATGACTATACAAATGCTATGTGGAGCTGAAGCTTGTGGTA
A_23_P304543	3.11566	-3.11566	-1.63954	down	2095.22	431.645	0	-1.63954	Detected	Detected	0	NM_147133	NM_147133	NM_147133	Hs.413074	4799	NFX1	"nuclear transcription factor, X-box binding 1"	ENST00000466971	THC2478617	GO:0000122(negative regulation of transcription from RNA polymerase II promoter)|GO:0000977(RNA polymerase II regulatory region sequence-specific DNA binding)|GO:0001078(RNA polymerase II core promoter proximal region sequence-specific DNA binding transcription factor activity involved in negative regulation of transcription)|GO:0003700(sequence-specific DNA binding transcription factor activity)…	"Homo sapiens nuclear transcription factor, X-box binding 1 (NFX1), transcript variant 2, mRNA [NM_147133]"	chr9:33347038-33347097	hs|9p13.3	TATCATTCTTGTCATAGTGAGGAGAAGTGTCCCCCTTGCACTTTCCTAACTCAGAAGTGG
A_23_P77440	3.36715	-3.36715	-1.75153	down	1470.18	280.257	-0.511108	-2.26264	Detected	Detected	0	NM_173165	NM_173165	NM_173165	Hs.436585	4775	NFATC3	"nuclear factor of activated T-cells, cytoplasmic, calcineurin-dependent 3"	ENST00000569766	THC2642592	GO:0000978(RNA polymerase II core promoter proximal region sequence-specific DNA binding)|GO:0001077(RNA polymerase II core promoter proximal region sequence-specific DNA binding transcription factor activity involved in positive regulation of transcription)|GO:0001569(patterning of blood vessels)|GO:0003682(chromatin binding)|GO:0005515(protein binding)|GO:0005634(nucleus)|GO:0005654(nucleoplasm…	"Homo sapiens nuclear factor of activated T-cells, cytoplasmic, calcineurin-dependent 3 (NFATC3), transcript variant 1, mRNA [NM_173165]"	chr16:68225293-68225352	hs|16q22.1	GTCTCAGTTACAACCTATTACATATGGTCCTTCACATTCAGGGTCTGCTACAACAGCTTC
A_33_P3292769	3.37566	-3.37566	-1.75517	down	77.7144	14.7772	-4.75278	-6.50795	Detected	Not Detected	0	NM_145912	NM_145912	NM_145912	Hs.436677	150372	NFAM1	NFAT activating protein with ITAM motif 1	ENST00000329021	THC2776736	GO:0001819(positive regulation of cytokine production)|GO:0004888(transmembrane signaling receptor activity)|GO:0005886(plasma membrane)|GO:0006954(inflammatory response)|GO:0007165(signal transduction)|GO:0009986(cell surface)|GO:0016021(integral to membrane)|GO:0030183(B cell differentiation)|GO:0035556(intracellular signal transduction)|GO:0045121(membrane raft)|GO:0045577(regulation of B cell…	"Homo sapiens NFAT activating protein with ITAM motif 1 (NFAM1), mRNA [NM_145912]"	chr22:42776472-42776413	hs|22q13.2	CATATGTGGGTGACAGAAGCATATGTTACAGTGAAACATTAAAACTACAGCAAAGTGAAA
A_33_P3346461	3.1096	-3.1096	-1.63673	down	83.9324	17.325	-4.64173	-6.27846	Detected	Not Detected	0	ENST00000621666		AK311046	Hs.710305	4671	NAIP	"NLR family, apoptosis inhibitory protein"	ENST00000621666	THC2688955	GO:0004842(ubiquitin-protein ligase activity)|GO:0005515(protein binding)|GO:0005524(ATP binding)|GO:0005634(nucleus)|GO:0005737(cytoplasm)|GO:0005876(spindle microtubule)|GO:0006954(inflammatory response)|GO:0007399(nervous system development)|GO:0009966(regulation of signal transduction)|GO:0016323(basolateral plasma membrane)|GO:0016567(protein ubiquitination)|GO:0043027(cysteine-type endopept…	"NLR family, apoptosis inhibitory protein [Source:HGNC Symbol;Acc:HGNC:7634] [ENST00000621666]"	chr5:68919510-68919569	hs|5q13.2	CATTACATGTTTACATTATCATGACTATACAAATGCTATGTGGAGCTGAAGCTTGTGGTA
A_23_P162918	3.81958	-3.81958	-1.93341	down	2303.72	387.134	0.136862	-1.79655	Detected	Detected	0	NM_001085	NM_001085	NM_001085	Hs.534293	12	SERPINA3	"serpin peptidase inhibitor, clade A (alpha-1 antiproteinase, antitrypsin), member 3"	ENST00000555820	THC2510513	GO:0003677(DNA binding)|GO:0004867(serine-type endopeptidase inhibitor activity)|GO:0005515(protein binding)|GO:0005576(extracellular region)|GO:0005615(extracellular space)|GO:0005622(intracellular)|GO:0005634(nucleus)|GO:0006953(acute-phase response)|GO:0006954(inflammatory response)|GO:0010951(negative regulation of endopeptidase activity)|GO:0019216(regulation of lipid metabolic process)|GO:0…	"Homo sapiens serpin peptidase inhibitor, clade A (alpha-1 antiproteinase, antitrypsin), member 3 (SERPINA3), mRNA [NM_001085]"	chr14:95081183-95081242	hs|14q32.13	GAGTATGGGAAATGCCATGTTTGTCAAAGAGCAACTCAGTCTGCTGGACAGGTTCACGGA
A_33_P3263867	4.10836	-4.10836	-2.03856	down	113.643	17.7551	-4.20452	-6.24308	Detected	Not Detected	0	NM_002562	NM_002562	NM_002562	Hs.729169	5027	P2RX7	"purinergic receptor P2X, ligand gated ion channel, 7"	ENST00000261826	THC2462534	"GO:0000187(activation of MAPK activity)|GO:0000287(magnesium ion binding)|GO:0000902(cell morphogenesis)|GO:0001530(lipopolysaccharide binding)|GO:0001614(purinergic nucleotide receptor activity)|GO:0001845(phagolysosome assembly)|GO:0001916(positive regulation of T cell mediated cytotoxicity)|GO:0002028(regulation of sodium ion transport)|GO:0004931(extracellular ATP-gated cation channel activi…	"Homo sapiens purinergic receptor P2X, ligand-gated ion channel, 7 (P2RX7), transcript variant 1, mRNA [NM_002562]"	chr12:121623474-121623533	hs|12q24.31	AGTTTCAGATCCTGATCTTAAGAGGCTGACAGCTTCTACTTGCTGTCCCTTGGAACTCTT
A_33_P3346461	3.1096	-3.1096	-1.63673	down	83.9324	17.325	-4.64173	-6.27846	Detected	Not Detected	0	ENST00000621666		AK311046	Hs.710305	4671	NAIP	"NLR family, apoptosis inhibitory protein"	ENST00000621666	THC2688955	GO:0004842(ubiquitin-protein ligase activity)|GO:0005515(protein binding)|GO:0005524(ATP binding)|GO:0005634(nucleus)|GO:0005737(cytoplasm)|GO:0005876(spindle microtubule)|GO:0006954(inflammatory response)|GO:0007399(nervous system development)|GO:0009966(regulation of signal transduction)|GO:0016323(basolateral plasma membrane)|GO:0016567(protein ubiquitination)|GO:0043027(cysteine-type endopept…	"NLR family, apoptosis inhibitory protein [Source:HGNC Symbol;Acc:HGNC:7634] [ENST00000621666]"	chr5:68919510-68919569	hs|5q13.2	CATTACATGTTTACATTATCATGACTATACAAATGCTATGTGGAGCTGAAGCTTGTGGTA
A_23_P213562	5.53464	-5.53464	-2.46849	down	4578.42	530.974	1.12775	-1.34074	Detected	Detected	0	NM_001992	NM_001992	NM_001992	Hs.482562	2149	F2R	coagulation factor II (thrombin) receptor	ENST00000319211	THC2466489	"GO:0000186(activation of MAPKK activity)|GO:0001965(G-protein alpha-subunit binding)|GO:0002248(connective tissue replacement involved in inflammatory response wound healing)|GO:0003105(negative regulation of glomerular filtration)|GO:0004930(G-protein coupled receptor activity)|GO:0005102(receptor binding)|GO:0005515(protein binding)|GO:0005576(extracellular region)|GO:0005769(early endosome)|G…	"Homo sapiens coagulation factor II (thrombin) receptor (F2R), mRNA [NM_001992]"	chr5:76030669-76030728	hs|5q13.3	AGTCTGATTTAATTGGGCACTATTTATTTACAAATGTTTTGCTCAATAGATTGCTCAAAT
A_23_P132856	7.85578	-7.85578	-2.97375	down	381.166	31.1438	-2.45861	-5.43237	Detected	Not Detected	0	NM_198565	NM_198565	NM_198565	Hs.702186	375387	NRROS	negative regulator of reactive oxygen species	ENST00000328557	THC2473113	GO:0005783(endoplasmic reticulum)|GO:0005789(endoplasmic reticulum membrane)|GO:0005886(plasma membrane)|GO:0006801(superoxide metabolic process)|GO:0006954(inflammatory response)|GO:0006955(immune response)|GO:0016021(integral to membrane)|GO:0045087(innate immune response)	"Homo sapiens negative regulator of reactive oxygen species (NRROS), mRNA [NM_198565]"	chr3:196388515-196388574	hs|3q29	CACTGTCATCGTCCTCACTTTTAAGAAGCCTCTGCTTCAGGTCATCAAGAGCCGCTGCCA
A_33_P3317005	8.66679	-8.66679	-3.1155	down	187.675	13.8994	-3.4808	-6.5963	Detected	Not Detected	0	NM_000578	NM_000578	NM_000578	Hs.591607	6556	SLC11A1	"solute carrier family 11 (proton-coupled divalent metal ion transporter), member 1"	ENST00000483487	THC2566353	"GO:0000060(protein import into nucleus, translocation)|GO:0001818(negative regulation of cytokine production)|GO:0001819(positive regulation of cytokine production)|GO:0002309(T cell proliferation involved in immune response)|GO:0002369(T cell cytokine production)|GO:0002606(positive regulation of dendritic cell antigen processing and presentation)|GO:0002827(positive regulation of T-helper 1 ty…	"Homo sapiens solute carrier family 11 (proton-coupled divalent metal ion transporter), member 1 (SLC11A1), mRNA [NM_000578]"	chr2:219249017-219249076	hs|2q35	ATGAGCATTGCTTTCCTGGACCCAGGAAACATCGAGTCAGATCTTCAGGCTGGCGCCGTG
A_33_P3349045	3.58853	-3.58853	-1.84339	down	1267.24	226.667	-0.725418	-2.56881	Detected	Detected	0	NM_001257407	NM_001257407	NM_001257407	Hs.513457	3566	IL4R	interleukin 4 receptor	ENST00000565696	NP1401558	GO:0002532(production of molecular mediator involved in inflammatory response)|GO:0004913(interleukin-4 receptor activity)|GO:0005057(receptor signaling protein activity)|GO:0005515(protein binding)|GO:0005615(extracellular space)|GO:0005887(integral to plasma membrane)|GO:0006955(immune response)|GO:0007165(signal transduction)|GO:0030728(ovulation)|GO:0035556(intracellular signal transduction)|…	"Homo sapiens interleukin 4 receptor (IL4R), transcript variant 4, mRNA [NM_001257407]"	chr16:27357879-27357938	hs|16p12.1	TTACCTGTATAATCATCTCACCTATGCAGTCAACATTTGGAGTGAAAACGACCCGGCAGA
A_33_P3360665	3.65201	-3.65201	-1.86869	down	3490.49	613.481	0.736324	-1.13237	Detected	Detected	0	NM_001105	NM_001105	NM_001105	Hs.470316	90	ACVR1	"activin A receptor, type I"	ENST00000410057	THC2462318	"GO:0000082(G1/S transition of mitotic cell cycle)|GO:0001569(patterning of blood vessels)|GO:0001655(urogenital system development)|GO:0001701(in utero embryonic development)|GO:0001702(gastrulation with mouth forming second)|GO:0001707(mesoderm formation)|GO:0001755(neural crest cell migration)|GO:0002526(acute inflammatory response)|GO:0003143(embryonic heart tube morphogenesis)|GO:0003183(mit…	"Homo sapiens activin A receptor, type I (ACVR1), transcript variant 1, mRNA [NM_001105]"	chr2:158594035-158593976	hs|2q24.1	ATAGTGTCAAGAAGGAAGATTTGACGTTGTTGTCATTGTCCAGCTGGGACCTAATGCTGG
A_23_P134419	3.8783	-3.8783	-1.95543	down	86.1658	14.2607	-4.60384	-6.55927	Detected	Not Detected	0	NM_007155	NM_007155	NM_007155	Hs.656137	7784	ZP3	zona pellucida glycoprotein 3 (sperm receptor)	ENST00000336517	THC2558457	"GO:0001669(acrosomal vesicle)|GO:0001809(positive regulation of type IV hypersensitivity)|GO:0001825(blastocyst formation)|GO:0002081(outer acrosomal membrane)|GO:0002455(humoral immune response mediated by circulating immunoglobulin)|GO:0002687(positive regulation of leukocyte migration)|GO:0002922(positive regulation of humoral immune response)|GO:0004871(signal transducer activity)|GO:0005384…	"Homo sapiens zona pellucida glycoprotein 3 (sperm receptor) (ZP3), transcript variant 2, mRNA [NM_007155]"	chr7:76054524-76054583	hs|7q11.23	GGTCTCCATGGACACAGAAGATGTGGTCAGGTTTGAGGTTGGACTCCACGAGTGTGGCAA
A_24_P242646	6.46041	-6.46041	-2.69163	down	373.58	37.1168	-2.48761	-5.17924	Detected	Not Detected	0	NM_004079	NM_004079	NM_004079	Hs.181301	1520	CTSS	cathepsin S	ENST00000607427	THC2557263	"GO:0001968(fibronectin binding)|GO:0002224(toll-like receptor signaling pathway)|GO:0002250(adaptive immune response)|GO:0002474(antigen processing and presentation of peptide antigen via MHC class I)|GO:0002480(antigen processing and presentation of exogenous peptide antigen via MHC class I, TAP-independent)|GO:0004197(cysteine-type endopeptidase activity)|GO:0005518(collagen binding)|GO:000557…	"Homo sapiens cathepsin S (CTSS), transcript variant 1, mRNA [NM_004079]"	chr1:150703572-150703513	hs|1q21.3	GTTTTTAACATAATTTTTGTTTTATCCACAACTTTTCAAGTATTGAAAGTAGAATAAAAA
A_33_P3246833	5.27556	-5.27556	-2.39932	down	3773.01	459.057	0.848611	-1.55071	Detected	Detected	0	NM_173843	NM_173843	NM_173843	Hs.81134	3557	IL1RN	interleukin 1 receptor antagonist	ENST00000259206	THC2498493	"GO:0001660(fever generation)|GO:0001960(negative regulation of cytokine-mediated signaling pathway)|GO:0002439(chronic inflammatory response to antigenic stimulus)|GO:0005125(cytokine activity)|GO:0005149(interleukin-1 receptor binding)|GO:0005150(interleukin-1, Type I receptor binding)|GO:0005151(interleukin-1, Type II receptor binding)|GO:0005152(interleukin-1 receptor antagonist activity)|GO:…	"Homo sapiens interleukin 1 receptor antagonist (IL1RN), transcript variant 4, mRNA [NM_173843]"	chr2:113891531-113891590	hs|2q13	TGCAAAGTTCCCTACTTCCTGTGACTTCAGCTCTGTTTTACAATAAAATCTTGAAAATGC
A_24_P45476	3.13105	-3.13105	-1.64665	down	133.37	27.341	-3.9736	-5.62025	Detected	Not Detected	0	NM_002995	NM_002995	NM_002995	Hs.546295	6375	XCL1	chemokine (C motif) ligand 1	ENST00000367818	THC2476442	"GO:0001916(positive regulation of T cell mediated cytotoxicity)|GO:0002690(positive regulation of leukocyte chemotaxis)|GO:0002725(negative regulation of T cell cytokine production)|GO:0002726(positive regulation of T cell cytokine production)|GO:0002826(negative regulation of T-helper 1 type immune response)|GO:0005576(extracellular region)|GO:0005615(extracellular space)|GO:0006955(immune resp…	"Homo sapiens chemokine (C motif) ligand 1 (XCL1), mRNA [NM_002995]"	chr1:168550524-168550583	hs|1q24.2	AGTTTATACTCACCTTTTATGAAAGCACTGCATGAATAAAATTATTCCTTTGTATTTTTA
A_33_P3220728	3.21055	-3.21055	-1.68282	down	794.779	158.897	-1.39848	-3.0813	Detected	Detected	0	NM_001003699	NM_001003699	NM_001003699	Hs.298248	6239	RREB1	ras responsive element binding protein 1	ENST00000349384	THC2492408	"GO:0000122(negative regulation of transcription from RNA polymerase II promoter)|GO:0000979(RNA polymerase II core promoter sequence-specific DNA binding)|GO:0003700(sequence-specific DNA binding transcription factor activity)|GO:0005634(nucleus)|GO:0005654(nucleoplasm)|GO:0005730(nucleolus)|GO:0005737(cytoplasm)|GO:0006355(regulation of transcription, DNA-dependent)|GO:0006366(transcription fro…	"Homo sapiens ras responsive element binding protein 1 (RREB1), transcript variant 1, mRNA [NM_001003699]"	chr6:7251136-7251195	hs|6p24.3	AAATCAGAACCAATGATCCCTTGGCCTACTTAGTTAAAACCAGTTCATACATCCCTTAGG
A_33_P3396139	3.29831	-3.29831	-1.72173	down	70.7797	13.7742	-4.88762	-6.60935	Detected	Not Detected	0	NM_005214	NM_005214	NM_005214	Hs.247824	1493	CTLA4	cytotoxic T-lymphocyte-associated protein 4	ENST00000302823	THC2476969	GO:0005515(protein binding)|GO:0005794(Golgi apparatus)|GO:0005886(plasma membrane)|GO:0005887(integral to plasma membrane)|GO:0006955(immune response)|GO:0006974(response to DNA damage stimulus)|GO:0009897(external side of plasma membrane)|GO:0030889(negative regulation of B cell proliferation)|GO:0031295(T cell costimulation)|GO:0042130(negative regulation of T cell proliferation)|GO:0043065(po…	"Homo sapiens cytotoxic T-lymphocyte-associated protein 4 (CTLA4), transcript variant 1, mRNA [NM_005214]"	chr2:204738564-204738623	hs|2q33.2	GGGGTGCATGAAGGTTTCTGAAAATTAACACTGCTTGTGTTTTTAACTCAATATTTTCCA
A_33_P3342081	4.42386	-4.42386	-2.14531	down	14241.9	2066.4	2.76497	0.619661	Detected	Detected	0	NM_001198	NM_001198	NM_001198	Hs.436023	639	PRDM1	"PR domain containing 1, with ZNF domain"	ENST00000369096	THC2470627	"GO:0000122(negative regulation of transcription from RNA polymerase II promoter)|GO:0000978(RNA polymerase II core promoter proximal region sequence-specific DNA binding)|GO:0001078(RNA polymerase II core promoter proximal region sequence-specific DNA binding transcription factor activity involved in negative regulation of transcription)|GO:0001893(maternal placenta development)|GO:0003700(seque…	"Homo sapiens PR domain containing 1, with ZNF domain (PRDM1), transcript variant 1, mRNA [NM_001198]"	chr6:106557662-106557721	hs|6q21	CCTCTACTCAAAGTTAAAACTGACCAAAGTTACTGGCTTTTTACTTTGCTAGAACAACAA
A_33_P3396139	3.29831	-3.29831	-1.72173	down	70.7797	13.7742	-4.88762	-6.60935	Detected	Not Detected	0	NM_005214	NM_005214	NM_005214	Hs.247824	1493	CTLA4	cytotoxic T-lymphocyte-associated protein 4	ENST00000302823	THC2476969	GO:0005515(protein binding)|GO:0005794(Golgi apparatus)|GO:0005886(plasma membrane)|GO:0005887(integral to plasma membrane)|GO:0006955(immune response)|GO:0006974(response to DNA damage stimulus)|GO:0009897(external side of plasma membrane)|GO:0030889(negative regulation of B cell proliferation)|GO:0031295(T cell costimulation)|GO:0042130(negative regulation of T cell proliferation)|GO:0043065(po…	"Homo sapiens cytotoxic T-lymphocyte-associated protein 4 (CTLA4), transcript variant 1, mRNA [NM_005214]"	chr2:204738564-204738623	hs|2q33.2	GGGGTGCATGAAGGTTTCTGAAAATTAACACTGCTTGTGTTTTTAACTCAATATTTTCCA
A_24_P82106	3.65778	-3.65778	-1.87097	down	31959.1	5608.21	3.93105	2.06008	Detected	Detected	0	NM_004995	NM_004995	NM_004995	Hs.2399	4323	MMP14	matrix metallopeptidase 14 (membrane-inserted)	ENST00000311852	THC2540029	"GO:0001525(angiogenesis)|GO:0001541(ovarian follicle development)|GO:0001666(response to hypoxia)|GO:0001935(endothelial cell proliferation)|GO:0001958(endochondral ossification)|GO:0003700(sequence-specific DNA binding transcription factor activity)|GO:0004222(metalloendopeptidase activity)|GO:0005178(integrin binding)|GO:0005509(calcium ion binding)|GO:0005515(protein binding)|GO:0005737(cytop…	"Homo sapiens matrix metallopeptidase 14 (membrane-inserted) (MMP14), mRNA [NM_004995]"	chr14:23315791-23315850	hs|14q11.2	GGACTGCCAAGCCACCCTAAGACCTTGGGAGGAAAACTCAGAGAGGGTCTTCGTTGCTCA
A_33_P3315764	3.75986	-3.75986	-1.91068	down	226.418	38.6533	-3.21004	-5.12072	Detected	Not Detected	0	NM_001126118	NM_001126118	NM_001126118	Hs.437460	7157	TP53	tumor protein p53	ENST00000503591	THC2469601	"GO:0000060(protein import into nucleus, translocation)|GO:0000122(negative regulation of transcription from RNA polymerase II promoter)|GO:0000733(DNA strand renaturation)|GO:0000785(chromatin)|GO:0000790(nuclear chromatin)|GO:0000979(RNA polymerase II core promoter sequence-specific DNA binding)|GO:0000981(sequence-specific DNA binding RNA polymerase II transcription factor activity)|GO:0001046…	"Homo sapiens tumor protein p53 (TP53), transcript variant 8, mRNA [NM_001126118]"	chr17:7579372-7579313	hs|17p13.1	CAGCTACGGTTTCCGTCTGGGCTTCTTGCATTCTGGGACAGCCAAGTCTGTGACTTGCAC
A_33_P3263867	4.10836	-4.10836	-2.03856	down	113.643	17.7551	-4.20452	-6.24308	Detected	Not Detected	0	NM_002562	NM_002562	NM_002562	Hs.729169	5027	P2RX7	"purinergic receptor P2X, ligand gated ion channel, 7"	ENST00000261826	THC2462534	"GO:0000187(activation of MAPK activity)|GO:0000287(magnesium ion binding)|GO:0000902(cell morphogenesis)|GO:0001530(lipopolysaccharide binding)|GO:0001614(purinergic nucleotide receptor activity)|GO:0001845(phagolysosome assembly)|GO:0001916(positive regulation of T cell mediated cytotoxicity)|GO:0002028(regulation of sodium ion transport)|GO:0004931(extracellular ATP-gated cation channel activi…	"Homo sapiens purinergic receptor P2X, ligand-gated ion channel, 7 (P2RX7), transcript variant 1, mRNA [NM_002562]"	chr12:121623474-121623533	hs|12q24.31	AGTTTCAGATCCTGATCTTAAGAGGCTGACAGCTTCTACTTGCTGTCCCTTGGAACTCTT
A_23_P54144	4.60018	-4.60018	-2.20169	down	126.209	17.6101	-4.05322	-6.25491	Detected	Not Detected	0	NM_001202	NM_001202	NM_001202	Hs.68879	652	BMP4	bone morphogenetic protein 4	ENST00000558984	THC2563105	GO:0000122(negative regulation of transcription from RNA polymerase II promoter)|GO:0000186(activation of MAPKK activity)|GO:0001649(osteoblast differentiation)|GO:0001657(ureteric bud development)|GO:0001658(branching involved in ureteric bud morphogenesis)|GO:0001822(kidney development)|GO:0001823(mesonephros development)|GO:0001843(neural tube closure)|GO:0001934(positive regulation of protein…	"Homo sapiens bone morphogenetic protein 4 (BMP4), transcript variant 1, mRNA [NM_001202]"	chr14:54417377-54417318	hs|14q22.2	GGACACGAGACTGGTCCACCACAATGTGACACGGTGGGAAACTTTTGATGTGAGCCCTGC
A_33_P3340639	4.89828	-4.89828	-2.29227	down	114.35	14.9845	-4.19557	-6.48785	Detected	Not Detected	0	ENST00000369425		AL832464	Hs.42586	57678	GPAM	"glycerol-3-phosphate acyltransferase, mitochondrial"	ENST00000369425	THC2612604	GO:0004366(glycerol-3-phosphate O-acyltransferase activity)|GO:0005741(mitochondrial outer membrane)|GO:0005743(mitochondrial inner membrane)|GO:0005886(plasma membrane)|GO:0006631(fatty acid metabolic process)|GO:0006637(acyl-CoA metabolic process)|GO:0006644(phospholipid metabolic process)|GO:0006654(phosphatidic acid biosynthetic process)|GO:0009749(response to glucose stimulus)|GO:0016021(int…	"glycerol-3-phosphate acyltransferase, mitochondrial [Source:HGNC Symbol;Acc:HGNC:24865] [ENST00000369425]"	chr10:113913749-113913690	hs|10q25.2	GGCCTTTTGTGAGGGACTGTTTGTGACTTTATTCTAAGTCATTTTAGAGTATAGTTATGT
A_23_P302060	5.17781	-5.17781	-2.37234	down	168.668	20.909	-3.63485	-6.00719	Detected	Not Detected	0	NM_176891	NM_176891	NM_176891	Hs.682604	338376	IFNE	"interferon, epsilon"	ENST00000448696	THC2488001	GO:0002250(adaptive immune response)|GO:0002286(T cell activation involved in immune response)|GO:0002323(natural killer cell activation involved in immune response)|GO:0005125(cytokine activity)|GO:0005132(interferon-alpha/beta receptor binding)|GO:0005615(extracellular space)|GO:0006959(humoral immune response)|GO:0019221(cytokine-mediated signaling pathway)|GO:0030183(B cell differentiation)|G…	"Homo sapiens interferon, epsilon (IFNE), mRNA [NM_176891]"	chr9:21481161-21481102	hs|9p21.3	TTGTGTTCAGTCTCACAGAAAAACTGAGCAAACAAGGAAGACCCTTGAACGACATGAAGC
A_33_P3272568	8.32849	-8.32849	-3.05805	down	617.309	47.5755	-1.76304	-4.82109	Detected	Not Detected	0	ENST00000379331				10549	PRDX4	peroxiredoxin 4	ENST00000379331		GO:0005515(protein binding)|GO:0005615(extracellular space)|GO:0005634(nucleus)|GO:0005739(mitochondrion)|GO:0005790(smooth endoplasmic reticulum)|GO:0005829(cytosol)|GO:0007252(I-kappaB phosphorylation)|GO:0007283(spermatogenesis)|GO:0008379(thioredoxin peroxidase activity)|GO:0008584(male gonad development)|GO:0019471(4-hydroxyproline metabolic process)|GO:0022417(protein maturation by protein …	peroxiredoxin 4 [Source:HGNC Symbol;Acc:HGNC:17169] [ENST00000379331]	chrX:23693494-23693553	hs|Xp22.11	CTATAGCGAAAACCACTGAATTATATGCTTATGATAAATTGGGTTACCATAATCTGGAGG
A_23_P167692	2.88382	-2.88382	-1.52798	down	1718.69	382.539	-0.285797	-1.81378	Detected	Detected	0	NM_002752	NM_002752	NM_002752	Hs.484371	5601	MAPK9	mitogen-activated protein kinase 9	ENST00000393362	THC2748854	"GO:0001836(release of cytochrome c from mitochondria)|GO:0001934(positive regulation of protein phosphorylation)|GO:0002224(toll-like receptor signaling pathway)|GO:0002755(MyD88-dependent toll-like receptor signaling pathway)|GO:0002756(MyD88-independent toll-like receptor signaling pathway)|GO:0004705(JUN kinase activity)|GO:0005515(protein binding)|GO:0005524(ATP binding)|GO:0005654(nucleopla…	"Homo sapiens mitogen-activated protein kinase 9 (MAPK9), transcript variant JNK2-a2, mRNA [NM_002752]"	chr5:179669726-179669667	hs|5q35.3	CAGCTGGGAACACCATCAGCAGAGTTCATGAAGAAACTTCAGCCAACTGTGAGGAATTAT
A_23_P412389	2.98308	-2.98308	-1.5768	down	228.425	49.1501	-3.19731	-4.77412	Detected	Not Detected	0	NM_003862	NM_003862	NM_003862	Hs.87191	8817	FGF18	fibroblast growth factor 18	ENST00000274625	THC2490213	GO:0001525(angiogenesis)|GO:0001936(regulation of endothelial cell proliferation)|GO:0001957(intramembranous ossification)|GO:0001958(endochondral ossification)|GO:0002063(chondrocyte development)|GO:0005105(type 1 fibroblast growth factor receptor binding)|GO:0005111(type 2 fibroblast growth factor receptor binding)|GO:0005576(extracellular region)|GO:0005615(extracellular space)|GO:0005730(nucl…	"Homo sapiens fibroblast growth factor 18 (FGF18), mRNA [NM_003862]"	chr5:170863258-170876190	hs|5q35.1	CGAGGATGGGGACAAGTATGCCCAGCTCCTAGTGGAGACAGACACCTTCGGTAGTCAAGT
A_33_P3258946	3.41457	-3.41457	-1.7717	down	1444.03	271.449	-0.537	-2.3087	Detected	Detected	0	NM_001193286	NM_001193286	NM_001193286	Hs.466693	22933	SIRT2	sirtuin 2	ENST00000407552	NP1076425	"GO:0000122(negative regulation of transcription from RNA polymerase II promoter)|GO:0000183(chromatin silencing at rDNA)|GO:0003682(chromatin binding)|GO:0003950(NAD+ ADP-ribosyltransferase activity)|GO:0004407(histone deacetylase activity)|GO:0005515(protein binding)|GO:0005634(nucleus)|GO:0005677(chromatin silencing complex)|GO:0005694(chromosome)|GO:0005720(nuclear heterochromatin)|GO:0005737…	"Homo sapiens sirtuin 2 (SIRT2), transcript variant 3, mRNA [NM_001193286]"	chr19:39379793-39379734	hs|19q13.2	AACCATCTGTCACTACTTCATGCGCCTGCTGAAGGACAAGGGGCTACTCCTGCGCTGCTA
A_24_P83615	3.05358	-3.05358	-1.6105	down	665.945	139.983	-1.65363	-3.26413	Detected	Detected	0	NM_001033053	NM_001033053	NM_001033053	Hs.652273	22861	NLRP1	"NLR family, pyrin domain containing 1"	ENST00000613500	THC2479491	"GO:0005515(protein binding)|GO:0005524(ATP binding)|GO:0005622(intracellular)|GO:0005634(nucleus)|GO:0005829(cytosol)|GO:0006915(apoptotic process)|GO:0006919(activation of cysteine-type endopeptidase activity involved in apoptotic process)|GO:0008656(cysteine-type endopeptidase activator activity involved in apoptotic process)|GO:0019899(enzyme binding)|GO:0019904(protein domain specific bindin…	"Homo sapiens NLR family, pyrin domain containing 1 (NLRP1), transcript variant 5, mRNA [NM_001033053]"	chr17:5424946-5424887	hs|17p13.2	CTTCATTCCCGTCACCTCTGTGGTGTTGCTTTACCACCGCGTCCATCCTGAGGAAGTCAC
A_33_P3424295	3.05954	-3.05954	-1.61331	down	632.01	132.591	-1.72908	-3.3424	Detected	Detected	0	NM_021138	NM_021138	NM_021138	Hs.522506	7186	TRAF2	TNF receptor-associated factor 2	ENST00000414589	THC2520985	GO:0000151(ubiquitin ligase complex)|GO:0002726(positive regulation of T cell cytokine production)|GO:0004842(ubiquitin-protein ligase activity)|GO:0004871(signal transducer activity)|GO:0005164(tumor necrosis factor receptor binding)|GO:0005174(CD40 receptor binding)|GO:0005515(protein binding)|GO:0005737(cytoplasm)|GO:0005829(cytosol)|GO:0005938(cell cortex)|GO:0006461(protein complex assembly)…	"Homo sapiens TNF receptor-associated factor 2 (TRAF2), mRNA [NM_021138]"	chr9:139794064-139794123	hs|9q34.3	TGCTGCCTGTGTTCACGAGGGCATATATGAAGAAGGCATTTCTATTTTAGAAAGCAGTTC
A_23_P100386	3.0599	-3.0599	-1.61348	down	109.24	22.9151	-4.26153	-5.87502	Detected	Not Detected	0	NM_152456	NM_152456	NM_152456	Hs.461214	146433	IL34	interleukin 34	ENST00000429149	THC2769697	GO:0001934(positive regulation of protein phosphorylation)|GO:0005125(cytokine activity)|GO:0005157(macrophage colony-stimulating factor receptor binding)|GO:0005615(extracellular space)|GO:0006954(inflammatory response)|GO:0008083(growth factor activity)|GO:0008284(positive regulation of cell proliferation)|GO:0045087(innate immune response)	"Homo sapiens interleukin 34 (IL34), transcript variant 1, mRNA [NM_152456]"	chr16:70688562-70690551	hs|16q22.1	ACTTCAGTACATGAAACACTACTTCCCCATCAACTACAAGATCAGTGTGCCTTACGAGGG
A_33_P3327058	3.06532	-3.06532	-1.61604	down	1030.54	215.793	-1.0237	-2.63973	Detected	Detected	0	NM_001162383	NM_001162383	NM_001162383	Hs.743352	9181	ARHGEF2	Rho/Rac guanine nucleotide exchange factor (GEF) 2	ENST00000313667	THC2466712	GO:0000132(establishment of mitotic spindle orientation)|GO:0000902(cell morphogenesis)|GO:0005089(Rho guanyl-nucleotide exchange factor activity)|GO:0005515(protein binding)|GO:0005737(cytoplasm)|GO:0005794(Golgi apparatus)|GO:0005819(spindle)|GO:0005829(cytosol)|GO:0005856(cytoskeleton)|GO:0005874(microtubule)|GO:0005923(tight junction)|GO:0005925(focal adhesion)|GO:0006886(intracellular protei…	"Homo sapiens Rho/Rac guanine nucleotide exchange factor (GEF) 2 (ARHGEF2), transcript variant 1, mRNA [NM_001162383]"	chr1:155920241-155920182	hs|1q22	TGTCACTACTCGCTCTGTCCATCGAAACTTTGAGGACCGAGAGAGGCAGGAACTGGGGAG
A_33_P3303245	3.08622	-3.08622	-1.62584	down	68.6835	14.2848	-4.931	-6.55683	Detected	Not Detected	0	NM_001093772	NM_001093772	NM_001093772	Hs.479754	3815	KIT	v-kit Hardy-Zuckerman 4 feline sarcoma viral oncogene homolog	ENST00000288135	THC2618211	GO:0000187(activation of MAPK activity)|GO:0001541(ovarian follicle development)|GO:0001669(acrosomal vesicle)|GO:0002020(protease binding)|GO:0002318(myeloid progenitor cell differentiation)|GO:0002320(lymphoid progenitor cell differentiation)|GO:0002327(immature B cell differentiation)|GO:0002371(dendritic cell cytokine production)|GO:0002551(mast cell chemotaxis)|GO:0004713(protein tyrosine ki…	"Homo sapiens v-kit Hardy-Zuckerman 4 feline sarcoma viral oncogene homolog (KIT), transcript variant 2, mRNA [NM_001093772]"	chr4:55569965-55570024	hs|4q12	AGTTCAGCGAGAGTTAATGATTCTGGAGTGTTCATGTGTTATGCCAATAATACTTTTGGA
A_33_P3346461	3.1096	-3.1096	-1.63673	down	83.9324	17.325	-4.64173	-6.27846	Detected	Not Detected	0	ENST00000621666		AK311046	Hs.710305	4671	NAIP	"NLR family, apoptosis inhibitory protein"	ENST00000621666	THC2688955	GO:0004842(ubiquitin-protein ligase activity)|GO:0005515(protein binding)|GO:0005524(ATP binding)|GO:0005634(nucleus)|GO:0005737(cytoplasm)|GO:0005876(spindle microtubule)|GO:0006954(inflammatory response)|GO:0007399(nervous system development)|GO:0009966(regulation of signal transduction)|GO:0016323(basolateral plasma membrane)|GO:0016567(protein ubiquitination)|GO:0043027(cysteine-type endopept…	"NLR family, apoptosis inhibitory protein [Source:HGNC Symbol;Acc:HGNC:7634] [ENST00000621666]"	chr5:68919510-68919569	hs|5q13.2	CATTACATGTTTACATTATCATGACTATACAAATGCTATGTGGAGCTGAAGCTTGTGGTA
A_24_P830690	3.11128	-3.11128	-1.63751	down	1853.2	382.324	-0.177081	-1.81459	Detected	Detected	0	NM_002613	NM_002613	NM_002613	Hs.459691	5170	PDPK1	3-phosphoinositide dependent protein kinase 1	ENST00000562415	NP1472903	"GO:0003323(type B pancreatic cell development)|GO:0004674(protein serine/threonine kinase activity)|GO:0004676(3-phosphoinositide-dependent protein kinase activity)|GO:0005158(insulin receptor binding)|GO:0005515(protein binding)|GO:0005524(ATP binding)|GO:0005654(nucleoplasm)|GO:0005737(cytoplasm)|GO:0005829(cytosol)|GO:0005886(plasma membrane)|GO:0005925(focal adhesion)|GO:0006351(transcriptio…	"Homo sapiens 3-phosphoinositide dependent protein kinase 1 (PDPK1), transcript variant 1, mRNA [NM_002613]"	chr16:2631645-2631704	hs|16p13.3	GAATATGACTTTCCAGAAAAATTCTTCCCTAAGGCAAGAGACCTCGTGGAGAAACTTTTG
A_23_P1374	3.12261	-3.12261	-1.64275	down	78.6025	16.1572	-4.73638	-6.37914	Detected	Not Detected	0	NM_006257	NM_006257	NM_006257	Hs.498570	5588	PRKCQ	"protein kinase C, theta"	ENST00000263125	THC2471720	"GO:0001558(regulation of cell growth)|GO:0001772(immunological synapse)|GO:0004674(protein serine/threonine kinase activity)|GO:0004697(protein kinase C activity)|GO:0004842(ubiquitin-protein ligase activity)|GO:0005515(protein binding)|GO:0005524(ATP binding)|GO:0005829(cytosol)|GO:0005886(plasma membrane)|GO:0006355(regulation of transcription, DNA-dependent)|GO:0006468(protein phosphorylation…	"Homo sapiens protein kinase C, theta (PRKCQ), transcript variant 1, mRNA [NM_006257]"	chr10:6470247-6470188	hs|10p15.1	ACTGATCAACAGCATGGACCAGAATATGTTCAGGAACTTTTCCTTCATGAACCCCGGGAT
A_33_P3413671	3.64638	-3.64638	-1.86647	down	6886.72	1212.27	1.71671	-0.149751	Detected	Detected	0	NM_007314	NM_007314	NM_007314	Hs.159472	27	ABL2	"ABL proto-oncogene 2, non-receptor tyrosine kinase"	ENST00000344730	THC2492412	"GO:0000287(magnesium ion binding)|GO:0001891(phagocytic cup)|GO:0003785(actin monomer binding)|GO:0004672(protein kinase activity)|GO:0004713(protein tyrosine kinase activity)|GO:0004715(non-membrane spanning protein tyrosine kinase activity)|GO:0005102(receptor binding)|GO:0005515(protein binding)|GO:0005524(ATP binding)|GO:0005829(cytosol)|GO:0006464(cellular protein modification process)|GO:0…	"Homo sapiens ABL proto-oncogene 2, non-receptor tyrosine kinase (ABL2), transcript variant b, mRNA [NM_007314]"	chr1:179073242-179073183	hs|1q25.2	AACACCTAGTCTAGGGATGCACAGCAGAATCCCCTAGGGTTAAAAAACAAAACAAAACAA
A_23_P171054	3.31861	-3.31861	-1.73058	down	1206.49	233.353	-0.796292	-2.52687	Detected	Detected	0	NM_005229	NM_005229	NM_005229	Hs.181128	2002	ELK1	"ELK1, member of ETS oncogene family"	ENST00000376983	THC2565271	"GO:0000978(RNA polymerase II core promoter proximal region sequence-specific DNA binding)|GO:0000981(sequence-specific DNA binding RNA polymerase II transcription factor activity)|GO:0001047(core promoter binding)|GO:0001077(RNA polymerase II core promoter proximal region sequence-specific DNA binding transcription factor activity involved in positive regulation of transcription)|GO:0002224(toll…	"Homo sapiens ELK1, member of ETS oncogene family (ELK1), transcript variant 2, mRNA [NM_005229]"	chrX:47495884-47495825	hs|Xp11.23	CCACTTTTTTCCCCAAGACAAGACAATCGAGGTCTGGCTTGAGAACGACCTTTCTTTCTT
A_24_P83615	3.05358	-3.05358	-1.6105	down	665.945	139.983	-1.65363	-3.26413	Detected	Detected	0	NM_001033053	NM_001033053	NM_001033053	Hs.652273	22861	NLRP1	"NLR family, pyrin domain containing 1"	ENST00000613500	THC2479491	"GO:0005515(protein binding)|GO:0005524(ATP binding)|GO:0005622(intracellular)|GO:0005634(nucleus)|GO:0005829(cytosol)|GO:0006915(apoptotic process)|GO:0006919(activation of cysteine-type endopeptidase activity involved in apoptotic process)|GO:0008656(cysteine-type endopeptidase activator activity involved in apoptotic process)|GO:0019899(enzyme binding)|GO:0019904(protein domain specific bindin…	"Homo sapiens NLR family, pyrin domain containing 1 (NLRP1), transcript variant 5, mRNA [NM_001033053]"	chr17:5424946-5424887	hs|17p13.2	CTTCATTCCCGTCACCTCTGTGGTGTTGCTTTACCACCGCGTCCATCCTGAGGAAGTCAC
A_23_P210886	3.22092	-3.22092	-1.68747	down	229.825	45.7999	-3.1885	-4.87597	Detected	Not Detected	0	NM_138578	NM_138578	NM_138578	Hs.516966	598	BCL2L1	BCL2-like 1	ENST00000307677	THC2507989	"GO:0000910(cytokinesis)|GO:0001541(ovarian follicle development)|GO:0001701(in utero embryonic development)|GO:0001836(release of cytochrome c from mitochondria)|GO:0005515(protein binding)|GO:0005634(nucleus)|GO:0005730(nucleolus)|GO:0005737(cytoplasm)|GO:0005739(mitochondrion)|GO:0005741(mitochondrial outer membrane)|GO:0005743(mitochondrial inner membrane)|GO:0005759(mitochondrial matrix)|GO:…	"Homo sapiens BCL2-like 1 (BCL2L1), transcript variant 1, mRNA [NM_138578]"	chr20:30253383-30253324	hs|20q11.21	GAACCTCTTCCCCAGAAAGGAGACTAGATTGCCTTTGTTTTGATGTTTGTGGCCTCAGAA
A_24_P823684	3.22933	-3.22933	-1.69124	down	26558.4	5278.82	3.66399	1.97276	Detected	Detected	0	NM_007355	NM_007355	NM_007355	Hs.509736	3326	HSP90AB1	"heat shock protein 90kDa alpha (cytosolic), class B member 1"	ENST00000505987	NP1202704	"GO:0001890(placenta development)|GO:0002134(UTP binding)|GO:0002135(CTP binding)|GO:0003725(double-stranded RNA binding)|GO:0005515(protein binding)|GO:0005524(ATP binding)|GO:0005525(GTP binding)|GO:0005654(nucleoplasm)|GO:0005737(cytoplasm)|GO:0005739(mitochondrion)|GO:0005829(cytosol)|GO:0006457(protein folding)|GO:0006986(response to unfolded protein)|GO:0007411(axon guidance)|GO:0008180(sig…	"Homo sapiens heat shock protein 90kDa alpha (cytosolic), class B member 1 (HSP90AB1), transcript variant 2, mRNA [NM_007355]"	chr6:44219211-44219270	hs|6p21.1	ATGCTCCAGCAGAGCAAAATCTTGAAAGTCATTCGCAAAAACATTGGTAAGAAGTGCCTT
A_33_P3352578	3.51071	-3.51071	-1.81176	down	108.01	19.7477	-4.27787	-6.08963	Detected	Not Detected	0	NM_080387	NM_080387	NM_080387	Hs.351811	338339	CLEC4D	"C-type lectin domain family 4, member D"	ENST00000382064	THC2479035	GO:0016021(integral to membrane)|GO:0030246(carbohydrate binding)|GO:0045087(innate immune response)	"Homo sapiens C-type lectin domain family 4, member D (CLEC4D), mRNA [NM_080387]"	chr12:8671658-8671717	hs|12p13.31	TATTTTCCTCTTACTGACAACAAGACGTGGGCTGAGAGTGAAAGGAACTGTTCAGGGATG
A_33_P3358641	5.46679	-5.46679	-2.45069	down	5651.56	663.564	1.43155	-1.01915	Detected	Detected	0	NM_001137552	NM_001137552	NM_001137552	Hs.471779	9208	LRRFIP1	leucine rich repeat (in FLII) interacting protein 1	ENST00000392000	THC2486418	"GO:0003677(DNA binding)|GO:0003725(double-stranded RNA binding)|GO:0005515(protein binding)|GO:0005575(cellular_component)|GO:0005634(nucleus)|GO:0005737(cytoplasm)|GO:0005829(cytosol)|GO:0005856(cytoskeleton)|GO:0005886(plasma membrane)|GO:0006351(transcription, DNA-dependent)|GO:0006357(regulation of transcription from RNA polymerase II promoter)|GO:0008150(biological_process)|GO:0032481(posit…	"Homo sapiens leucine rich repeat (in FLII) interacting protein 1 (LRRFIP1), transcript variant 3, mRNA [NM_001137552]"	chr2:238672559-238672618	hs|2q37.3	TCACAGGACATTAGTGATGCCTGTGAAGCAGAAAGTACAGAGAGGTGTGAGATGTCAGAA
A_23_P70409	3.5313	-3.5313	-1.8202	down	9850.64	1790.51	2.23311	0.412914	Detected	Detected	0	NM_203290	NM_203290	NM_203290	Hs.743509	9533	POLR1C	"polymerase (RNA) I polypeptide C, 30kDa"	ENST00000488601	THC2483464	"GO:0001054(RNA polymerase I activity)|GO:0001056(RNA polymerase III activity)|GO:0003677(DNA binding)|GO:0003899(DNA-directed RNA polymerase activity)|GO:0005654(nucleoplasm)|GO:0005666(DNA-directed RNA polymerase III complex)|GO:0005736(DNA-directed RNA polymerase I complex)|GO:0005829(cytosol)|GO:0006360(transcription from RNA polymerase I promoter)|GO:0006361(transcription initiation from RNA…	"Homo sapiens polymerase (RNA) I polypeptide C, 30kDa (POLR1C), mRNA [NM_203290]"	chr6:43487873-43488021	hs|6p21.1	ATGCTGCTAAAGATTCCTCTGACCCCAACGAACTGTACGTGAACCACAAAGTGTATACCA

## Sheet: cell communication
ProbeName	FC (abs) [MSC/P/C-h 2:1] vs [MSC]	FC [MSC/P/C-h 2:1] vs [MSC]	Log FC [MSC/P/C-h 2:1] vs [MSC]	Regulation [MSC/P/C-h 2:1] vs [MSC]	MSC:gProcessedSignal(raw)	MSC/P/C-h 2:1:gProcessedSignal(raw)	MSC:gProcessedSignal(normalized)	MSC/P/C-h 2:1:gProcessedSignal(normalized)	MSC:gFEFlags	MSC/P/C-h 2:1:gFEFlags	ControlType	PrimaryAccession	RefSeqAccession	GenbankAccession	UniGeneID	EntrezGeneID	GeneSymbol	GeneName	EnsemblID	TIGRID	GO	Description	GenomicCoordinates	Cytoband	Sequence_x000D_
A_33_P3258467	3.17095	3.17095	1.66491	up	8192.5	16674.5	1.9672	3.63211	Detected	Detected	0	NM_178313	NM_178313	NM_178313	Hs.503178	6711	SPTBN1	"spectrin, beta, non-erythrocytic 1"	ENST00000333896	THC2552645	GO:0000281(cytokinesis after mitosis)|GO:0003779(actin binding)|GO:0005200(structural constituent of cytoskeleton)|GO:0005515(protein binding)|GO:0005516(calmodulin binding)|GO:0005543(phospholipid binding)|GO:0005730(nucleolus)|GO:0005737(cytoplasm)|GO:0005829(cytosol)|GO:0007009(plasma membrane organization)|GO:0007182(common-partner SMAD protein phosphorylation)|GO:0007184(SMAD protein import …	"Homo sapiens spectrin, beta, non-erythrocytic 1 (SPTBN1), transcript variant 2, mRNA [NM_178313]"	chr2:54889385-54889444	hs|2p16.2	GTGTGCTGTCTGTTGGCATGCTTAAAGCACATGTCCATTAAAATTCATTTTGTTCCTTTT
A_33_P3319542	2.95729	2.95729	1.56427	up	192.381	365.177	-3.44506	-1.88079	Detected	Detected	0	NM_015063	NM_015063	NM_015063	Hs.172884	6543	SLC8A2	"solute carrier family 8 (sodium/calcium exchanger), member 2"	ENST00000236877	THC2515594	GO:0005432(calcium:sodium antiporter activity)|GO:0005516(calmodulin binding)|GO:0005886(plasma membrane)|GO:0006811(ion transport)|GO:0006816(calcium ion transport)|GO:0007154(cell communication)|GO:0007596(blood coagulation)|GO:0016021(integral to membrane)|GO:0035725(sodium ion transmembrane transport)|GO:0055085(transmembrane transport)	"Homo sapiens solute carrier family 8 (sodium/calcium exchanger), member 2 (SLC8A2), mRNA [NM_015063]"	chr19:47931982-47931923	hs|19q13.32	TCGCTGTCTCTTTTCTGTGATTTCTGTAAAAGTTGCCATAAAACTTTGAAATTCTGCCTG
A_33_P3377151	3.5296	3.5296	1.8195	up	51.5703	116.835	-5.34442	-3.52491	Not Detected	Detected	0	NM_006274	NM_006274	NM_006274	Hs.50002	6363	CCL19	chemokine (C-C motif) ligand 19	ENST00000378800	THC2470923	GO:0001768(establishment of T cell polarity)|GO:0001771(immunological synapse formation)|GO:0002407(dendritic cell chemotaxis)|GO:0002408(myeloid dendritic cell chemotaxis)|GO:0002606(positive regulation of dendritic cell antigen processing and presentation)|GO:0005576(extracellular region)|GO:0005615(extracellular space)|GO:0006874(cellular calcium ion homeostasis)|GO:0006954(inflammatory respon…	"Homo sapiens chemokine (C-C motif) ligand 19 (CCL19), mRNA [NM_006274]"	chr9:34690267-34690208	hs|9p13.3	ACATCGTGAGGAACTTCCACTACCTTCTCATCAAGGATGGCTGCAGGGTGCCTGCTGTAG
A_23_P148879	12.1524	12.1524	3.60317	up	12.0844	94.2618	-7.43781	-3.83464	Not Detected	Detected	0	NM_000702	NM_000702	NM_000702	Hs.34114	477	ATP1A2	"ATPase, Na+/K+ transporting, alpha 2 polypeptide"	ENST00000361216	THC2469667	GO:0001504(neurotransmitter uptake)|GO:0002026(regulation of the force of heart contraction)|GO:0002087(regulation of respiratory gaseous exchange by neurological system process)|GO:0005391(sodium:potassium-exchanging ATPase activity)|GO:0005524(ATP binding)|GO:0005737(cytoplasm)|GO:0005768(endosome)|GO:0005886(plasma membrane)|GO:0005890(sodium:potassium-exchanging ATPase complex)|GO:0005901(cav…	"Homo sapiens ATPase, Na+/K+ transporting, alpha 2 polypeptide (ATP1A2), mRNA [NM_000702]"	chr1:160113275-160113334	hs|1q23.2	AGAAACATCTACAGGATCTTTATTGGTGACCTTTTGTAAGACATTAGTTTGAGGTACTAC
A_33_P3396214	3.0302	3.0302	1.59941	up	96.1072	186.928	-4.44631	-2.8469	Detected	Detected	0	NM_172229	NM_172229	NM_172229	Hs.661128	79412	KREMEN2	kringle containing transmembrane protein 2	ENST00000572045	NP526758	GO:0005886(plasma membrane)|GO:0007154(cell communication)|GO:0016020(membrane)|GO:0016021(integral to membrane)|GO:0016055(Wnt receptor signaling pathway)|GO:0031901(early endosome membrane)|GO:0090090(negative regulation of canonical Wnt receptor signaling pathway)	"Homo sapiens kringle containing transmembrane protein 2 (KREMEN2), transcript variant 4, mRNA [NM_172229]"	chr16:3018321-3018380	hs|16p13.3	CAGGTCAGCAAAAACAGTCAAAAAACCCCCACAGATTTTGAATAAAGGATCTACTTTGGT
A_23_P70213	2.95517	-2.95517	-1.56324	down	321.2	69.7654	-2.70556	-4.2688	Detected	Not Detected	0	NM_000038	NM_000038	NM_000038	Hs.158932	324	APC	adenomatous polyposis coli	ENST00000508376	THC2468407	GO:0000281(cytokinesis after mitosis)|GO:0000776(kinetochore)|GO:0001822(kidney development)|GO:0001942(hair follicle development)|GO:0005515(protein binding)|GO:0005634(nucleus)|GO:0005654(nucleoplasm)|GO:0005737(cytoplasm)|GO:0005813(centrosome)|GO:0005829(cytosol)|GO:0005881(cytoplasmic microtubule)|GO:0005886(plasma membrane)|GO:0005913(cell-cell adherens junction)|GO:0005923(tight junction)|…	"Homo sapiens adenomatous polyposis coli (APC), transcript variant 3, mRNA [NM_000038]"	chr5:112180822-112180881	hs|5q22.2	AACAATTGAAGAAGACTGTTGCCACTTAACCATTCCATGCGTTGGCACTTATCTATTCCT
A_23_P412389	2.98308	-2.98308	-1.5768	down	228.425	49.1501	-3.19731	-4.77412	Detected	Not Detected	0	NM_003862	NM_003862	NM_003862	Hs.87191	8817	FGF18	fibroblast growth factor 18	ENST00000274625	THC2490213	GO:0001525(angiogenesis)|GO:0001936(regulation of endothelial cell proliferation)|GO:0001957(intramembranous ossification)|GO:0001958(endochondral ossification)|GO:0002063(chondrocyte development)|GO:0005105(type 1 fibroblast growth factor receptor binding)|GO:0005111(type 2 fibroblast growth factor receptor binding)|GO:0005576(extracellular region)|GO:0005615(extracellular space)|GO:0005730(nucl…	"Homo sapiens fibroblast growth factor 18 (FGF18), mRNA [NM_003862]"	chr5:170863258-170876190	hs|5q35.1	CGAGGATGGGGACAAGTATGCCCAGCTCCTAGTGGAGACAGACACCTTCGGTAGTCAAGT
A_23_P100386	3.0599	-3.0599	-1.61348	down	109.24	22.9151	-4.26153	-5.87502	Detected	Not Detected	0	NM_152456	NM_152456	NM_152456	Hs.461214	146433	IL34	interleukin 34	ENST00000429149	THC2769697	GO:0001934(positive regulation of protein phosphorylation)|GO:0005125(cytokine activity)|GO:0005157(macrophage colony-stimulating factor receptor binding)|GO:0005615(extracellular space)|GO:0006954(inflammatory response)|GO:0008083(growth factor activity)|GO:0008284(positive regulation of cell proliferation)|GO:0045087(innate immune response)	"Homo sapiens interleukin 34 (IL34), transcript variant 1, mRNA [NM_152456]"	chr16:70688562-70690551	hs|16q22.1	ACTTCAGTACATGAAACACTACTTCCCCATCAACTACAAGATCAGTGTGCCTTACGAGGG
A_23_P77415	3.27522	-3.27522	-1.71159	down	3346.27	655.793	0.675449	-1.03614	Detected	Detected	0	NM_182981	NM_182981	NM_182981	Hs.128055	29948	OSGIN1	oxidative stress induced growth inhibitor 1	ENST00000361711	NP836833	GO:0005575(cellular_component)|GO:0007275(multicellular organismal development)|GO:0008083(growth factor activity)|GO:0030154(cell differentiation)|GO:0030308(negative regulation of cell growth)|GO:0043065(positive regulation of apoptotic process)	"Homo sapiens oxidative stress induced growth inhibitor 1 (OSGIN1), mRNA [NM_182981]"	chr16:83999149-83999208	hs|16q23.3	TGGTGTTCAACCAGCTGCCCAAGATGCTGTACCCCGAGTACCACAAGGTGCACCAGATGA
A_23_P106024	3.53959	-3.53959	-1.82358	down	114.122	20.6949	-4.19846	-6.02204	Detected	Not Detected	0	NM_002226	NM_002226	NM_002226	Hs.433445	3714	JAG2	jagged 2	ENST00000546616	THC2752312	GO:0001501(skeletal system development)|GO:0001701(in utero embryonic development)|GO:0003016(respiratory system process)|GO:0005112(Notch binding)|GO:0005509(calcium ion binding)|GO:0005515(protein binding)|GO:0005886(plasma membrane)|GO:0005887(integral to plasma membrane)|GO:0007049(cell cycle)|GO:0007219(Notch signaling pathway)|GO:0007220(Notch receptor processing)|GO:0007283(spermatogenesis…	"Homo sapiens jagged 2 (JAG2), transcript variant 1, mRNA [NM_002226]"	chr14:105608733-105608674	hs|14q32.33	GCGTTTGTTACCAGAGGTTGTGCACTGTTTACAGAATCTTCCTTTTATTCCTCACTCGGG
A_33_P3348719	4.06668	-4.06668	-2.02385	down	90.302	14.253	-4.5362	-6.56005	Detected	Not Detected	0	NM_002010	NM_002010	NM_002010	Hs.111	2254	FGF9	fibroblast growth factor 9	ENST00000382353	THC2610201	GO:0000122(negative regulation of transcription from RNA polymerase II promoter)|GO:0001525(angiogenesis)|GO:0001649(osteoblast differentiation)|GO:0002053(positive regulation of mesenchymal cell proliferation)|GO:0002062(chondrocyte differentiation)|GO:0005104(fibroblast growth factor receptor binding)|GO:0005576(extracellular region)|GO:0005604(basement membrane)|GO:0005615(extracellular space)…	"Homo sapiens fibroblast growth factor 9 (FGF9), mRNA [NM_002010]"	chr13:22278493-22278552	hs|13q12.11	AAATGGCTGCCTTCTGGTGTTTTTATTCTATTTCATCTCATTAACACTACAACCTTGTGT
A_23_P160336	4.45796	-4.45796	-2.15638	down	242.498	34.9156	-3.11106	-5.26744	Detected	Not Detected	0	NM_020997	NM_020997	NM_020997	Hs.656214	10637	LEFTY1	left-right determination factor 1	ENST00000272134	THC2619243	GO:0000122(negative regulation of transcription from RNA polymerase II promoter)|GO:0003007(heart morphogenesis)|GO:0005125(cytokine activity)|GO:0005160(transforming growth factor beta receptor binding)|GO:0005615(extracellular space)|GO:0007179(transforming growth factor beta receptor signaling pathway)|GO:0007368(determination of left/right symmetry)|GO:0008083(growth factor activity)|GO:00108…	"Homo sapiens left-right determination factor 1 (LEFTY1), mRNA [NM_020997]"	chr1:226074167-226074108	hs|1q42.12	TGGAGATACTGTAACCTGAGGGCAGAAAGCCCAATGTGTCATTGTTTACTTGTCCTGTCA
A_23_P54144	4.60018	-4.60018	-2.20169	down	126.209	17.6101	-4.05322	-6.25491	Detected	Not Detected	0	NM_001202	NM_001202	NM_001202	Hs.68879	652	BMP4	bone morphogenetic protein 4	ENST00000558984	THC2563105	GO:0000122(negative regulation of transcription from RNA polymerase II promoter)|GO:0000186(activation of MAPKK activity)|GO:0001649(osteoblast differentiation)|GO:0001657(ureteric bud development)|GO:0001658(branching involved in ureteric bud morphogenesis)|GO:0001822(kidney development)|GO:0001823(mesonephros development)|GO:0001843(neural tube closure)|GO:0001934(positive regulation of protein…	"Homo sapiens bone morphogenetic protein 4 (BMP4), transcript variant 1, mRNA [NM_001202]"	chr14:54417377-54417318	hs|14q22.2	GGACACGAGACTGGTCCACCACAATGTGACACGGTGGGAAACTTTTGATGTGAGCCCTGC
A_23_P96478	5.22291	-5.22291	-2.38485	down	112.319	13.8034	-4.22143	-6.60628	Detected	Not Detected	0	NM_182681	NM_182681	NM_182681	Hs.654436	265	AMELX	"amelogenin, X-linked"	ENST00000348912	NP832812	GO:0001649(osteoblast differentiation)|GO:0001837(epithelial to mesenchymal transition)|GO:0002062(chondrocyte differentiation)|GO:0005515(protein binding)|GO:0005578(proteinaceous extracellular matrix)|GO:0007155(cell adhesion)|GO:0007165(signal transduction)|GO:0008083(growth factor activity)|GO:0008283(cell proliferation)|GO:0009986(cell surface)|GO:0030345(structural constituent of tooth enam…	"Homo sapiens amelogenin, X-linked (AMELX), transcript variant 2, mRNA [NM_182681]"	chrX:11311573-11312940	hs|Xp22.2	CTGAATACATTCAAAGAACCATCAAGAAATGGGGACCTGGATTTTATTTGCCTGCCTCCT
A_33_P3256778	5.27148	-5.27148	-2.39821	down	187.179	22.7915	-3.48461	-5.88282	Detected	Not Detected	0	NM_000614	NM_000614	NM_000614	Hs.524920	1270	CNTF	ciliary neurotrophic factor	ENST00000361987	THC2478967	GO:0005127(ciliary neurotrophic factor receptor binding)|GO:0005138(interleukin-6 receptor binding)|GO:0005615(extracellular space)|GO:0005737(cytoplasm)|GO:0007165(signal transduction)|GO:0008083(growth factor activity)|GO:0008284(positive regulation of cell proliferation)|GO:0040007(growth)|GO:0042517(positive regulation of tyrosine phosphorylation of Stat3 protein)|GO:0043524(negative regulati…	"Homo sapiens ciliary neurotrophic factor (CNTF), mRNA [NM_000614]"	chr11:58393143-58393202	hs|11q12.1	GTTCCTACTGGAGATACCAGAGACTCTGAAACTATAGAATAAAGCCTCTGTGCTGCACAA
A_23_P397455	3.60605	-3.60605	-1.85042	down	773.651	137.708	-1.43735	-3.28777	Detected	Detected	0	NM_145259	NM_145259	NM_145259	Hs.562901	130399	ACVR1C	"activin A receptor, type IC"	ENST00000243349	THC2474621	"GO:0002021(response to dietary excess)|GO:0004702(receptor signaling protein serine/threonine kinase activity)|GO:0005024(transforming growth factor beta-activated receptor activity)|GO:0005524(ATP binding)|GO:0005886(plasma membrane)|GO:0006468(protein phosphorylation)|GO:0009749(response to glucose stimulus)|GO:0016361(activin receptor activity, type I)|GO:0019838(growth factor binding)|GO:001…	"Homo sapiens activin A receptor, type IC (ACVR1C), transcript variant 1, mRNA [NM_145259]"	chr2:158389215-158389156	hs|2q24.1	TGAGTGAGTGAGTACAGAAGAATGCTCATGATAGTTTTGCCTTCATTCTACTTTCTGTGG
A_32_P134209	3.63763	-3.63763	-1.863	down	1555.31	274.439	-0.429903	-2.2929	Detected	Detected	0	NM_001106	NM_001106	NM_001106	Hs.174273	93	ACVR2B	"activin A receptor, type IIB"	ENST00000352511	THC2675601	"GO:0001702(gastrulation with mouth forming second)|GO:0001822(kidney development)|GO:0001946(lymphangiogenesis)|GO:0001974(blood vessel remodeling)|GO:0004674(protein serine/threonine kinase activity)|GO:0004702(receptor signaling protein serine/threonine kinase activity)|GO:0004712(protein serine/threonine/tyrosine kinase activity)|GO:0005024(transforming growth factor beta-activated receptor a…	"Homo sapiens activin A receptor, type IIB (ACVR2B), mRNA [NM_001106]"	chr3:38534307-38534366	hs|3p22.2	TGGCCTAAAGCAGACATCCATGTAATTACAGTTGCAAAATGAAAACATTTTGGAAAGAAC
A_23_P1431	2.37432	-2.37432	-1.24752	down	804.807	217.57	-1.38039	-2.6279	Detected	Detected	0	NM_004329	NM_004329	NM_004329	Hs.524477	657	BMPR1A	"bone morphogenetic protein receptor, type IA"	ENST00000372037	THC2462414	"GO:0000981(sequence-specific DNA binding RNA polymerase II transcription factor activity)|GO:0001701(in utero embryonic development)|GO:0001707(mesoderm formation)|GO:0001756(somitogenesis)|GO:0001880(Mullerian duct regression)|GO:0002053(positive regulation of mesenchymal cell proliferation)|GO:0003272(endocardial cushion formation)|GO:0004674(protein serine/threonine kinase activity)|GO:000467…	"Homo sapiens bone morphogenetic protein receptor, type IA (BMPR1A), mRNA [NM_004329]"	chr10:88683898-88683957	hs|10q23.2	CGTTTGTATTCTACCTTTGTAAAACAGCCTATAGATGATGATGTGTTTGGGATACTGCTT
A_23_P397455	3.60605	-3.60605	-1.85042	down	773.651	137.708	-1.43735	-3.28777	Detected	Detected	0	NM_145259	NM_145259	NM_145259	Hs.562901	130399	ACVR1C	"activin A receptor, type IC"	ENST00000243349	THC2474621	"GO:0002021(response to dietary excess)|GO:0004702(receptor signaling protein serine/threonine kinase activity)|GO:0005024(transforming growth factor beta-activated receptor activity)|GO:0005524(ATP binding)|GO:0005886(plasma membrane)|GO:0006468(protein phosphorylation)|GO:0009749(response to glucose stimulus)|GO:0016361(activin receptor activity, type I)|GO:0019838(growth factor binding)|GO:001…	"Homo sapiens activin A receptor, type IC (ACVR1C), transcript variant 1, mRNA [NM_145259]"	chr2:158389215-158389156	hs|2q24.1	TGAGTGAGTGAGTACAGAAGAATGCTCATGATAGTTTTGCCTTCATTCTACTTTCTGTGG
A_33_P3250820	3.07085	-3.07085	-1.61864	down	74.532	15.5787	-4.8131	-6.43173	Detected	Not Detected	0	NM_207361	NM_207361	NM_207361	Hs.253994	341640	FREM2	FRAS1 related extracellular matrix protein 2	ENST00000280481	THC2562680	GO:0002009(morphogenesis of an epithelium)|GO:0005509(calcium ion binding)|GO:0005604(basement membrane)|GO:0005886(plasma membrane)|GO:0007154(cell communication)|GO:0007156(homophilic cell adhesion)|GO:0016021(integral to membrane)|GO:0048839(inner ear development)|GO:0070062(extracellular vesicular exosome)	"Homo sapiens FRAS1 related extracellular matrix protein 2 (FREM2), mRNA [NM_207361]"	chr13:39461187-39461246	hs|13q13.3	CCGCTTGTGTTTCATAACTACGCTTGCTTTCCTTCAAAATATACCAAGTGTGTAATATAA
A_23_P211401	3.11081	-3.11081	-1.63729	down	534.893	110.368	-1.96978	-3.60707	Detected	Detected	0	NM_001039570	NM_001039570	NM_001039570	Hs.229335	83999	KREMEN1	kringle containing transmembrane protein 1	ENST00000407188	THC2482675	GO:0005515(protein binding)|GO:0007154(cell communication)|GO:0016020(membrane)|GO:0016021(integral to membrane)|GO:0016055(Wnt receptor signaling pathway)|GO:0060828(regulation of canonical Wnt receptor signaling pathway)	"Homo sapiens kringle containing transmembrane protein 1 (KREMEN1), transcript variant 3, mRNA [NM_001039570]"	chr22:29538001-29538060	hs|22q12.1	GAGCATTTTTTACAAGCCTTCCACTTCAATTTCCATCTTTAAGAAGAAACTCAAGGGTCA
A_24_P738168	5.77981	-5.77981	-2.53102	down	123.959	13.7661	-4.07917	-6.61019	Detected	Not Detected	0	NM_001168235	NM_001168235	NM_001168235	Hs.252714	166752	FREM3	FRAS1 related extracellular matrix 3		THC2681815	GO:0005604(basement membrane)|GO:0005615(extracellular space)|GO:0007154(cell communication)|GO:0007155(cell adhesion)|GO:0016021(integral to membrane)|GO:0031012(extracellular matrix)|GO:0046872(metal ion binding)	"Homo sapiens FRAS1 related extracellular matrix 3 (FREM3), mRNA [NM_001168235]"	chr4:144498734-144498675	hs|4q31.21	GATATGTCTCCTAACAACAGAATGAAACTCTACTGTTTATAGATCTTAGCAATTCTGGGA
A_24_P498652	4.24495	-4.24495	-2.08575	down	148.509	22.4557	-3.81848	-5.90423	Detected	Not Detected	0	NM_000217	NM_000217	NM_000217	Hs.416139	3736	KCNA1	"potassium channel, voltage gated shaker related subfamily A, member 1"	ENST00000382545	THC2601280	GO:0005249(voltage-gated potassium channel activity)|GO:0005251(delayed rectifier potassium channel activity)|GO:0005267(potassium channel activity)|GO:0005515(protein binding)|GO:0005783(endoplasmic reticulum)|GO:0005829(cytosol)|GO:0005886(plasma membrane)|GO:0005887(integral to plasma membrane)|GO:0006813(potassium ion transport)|GO:0006937(regulation of muscle contraction)|GO:0007268(synaptic…	"Homo sapiens potassium channel, voltage gated shaker related subfamily A, member 1 (KCNA1), mRNA [NM_000217]"	chr12:5026618-5026677	hs|12p13.32	GTCACTGTGCAAACTAATTCAGGGTACAGATATAAAGTTTAGAAGCCTTCGGATTAAATG
A_33_P3297580	5.23329	-5.23329	-2.38772	down	121.839	14.9437	-4.10406	-6.49177	Detected	Not Detected	0	NM_199460	NM_199460	NM_199460	Hs.118262	775	CACNA1C	"calcium channel, voltage-dependent, L type, alpha 1C subunit"	ENST00000347598	NP113775	GO:0002095(caveolar macromolecular signaling complex)|GO:0005245(voltage-gated calcium channel activity)|GO:0005515(protein binding)|GO:0005516(calmodulin binding)|GO:0005737(cytoplasm)|GO:0005886(plasma membrane)|GO:0005891(voltage-gated calcium channel complex)|GO:0006112(energy reserve metabolic process)|GO:0007204(elevation of cytosolic calcium ion concentration)|GO:0007268(synaptic transmiss…	"Homo sapiens calcium channel, voltage-dependent, L type, alpha 1C subunit (CACNA1C), transcript variant 1, mRNA [NM_199460]"	chr12:2800077-2800136	hs|12p13.33	AGAAGGACTGGGGCAGTTTGCTCAAGATCCCAAGTTCATCGAGGTCACCACCCAGGAGCT
A_23_P202334	2.91122	-2.91122	-1.54162	down	627.713	138.399	-1.73892	-3.28055	Detected	Detected	0	NM_022970	NM_022970	NM_022970	Hs.533683	2263	FGFR2	fibroblast growth factor receptor 2	ENST00000358487	NP319722	GO:0000122(negative regulation of transcription from RNA polymerase II promoter)|GO:0001525(angiogenesis)|GO:0001657(ureteric bud development)|GO:0001701(in utero embryonic development)|GO:0001837(epithelial to mesenchymal transition)|GO:0002053(positive regulation of mesenchymal cell proliferation)|GO:0003148(outflow tract septum morphogenesis)|GO:0003149(membranous septum morphogenesis)|GO:0004…	"Homo sapiens fibroblast growth factor receptor 2 (FGFR2), transcript variant 2, mRNA [NM_022970]"	chr10:123237843-123237830	hs|10q26.13	CAGCTGGCCTTCTGCTTCTGAGTTGCACATTAATCAGATTAGCCTGATTCTCTTCAGTGA
A_23_P412389	2.98308	-2.98308	-1.5768	down	228.425	49.1501	-3.19731	-4.77412	Detected	Not Detected	0	NM_003862	NM_003862	NM_003862	Hs.87191	8817	FGF18	fibroblast growth factor 18	ENST00000274625	THC2490213	GO:0001525(angiogenesis)|GO:0001936(regulation of endothelial cell proliferation)|GO:0001957(intramembranous ossification)|GO:0001958(endochondral ossification)|GO:0002063(chondrocyte development)|GO:0005105(type 1 fibroblast growth factor receptor binding)|GO:0005111(type 2 fibroblast growth factor receptor binding)|GO:0005576(extracellular region)|GO:0005615(extracellular space)|GO:0005730(nucl…	"Homo sapiens fibroblast growth factor 18 (FGF18), mRNA [NM_003862]"	chr5:170863258-170876190	hs|5q35.1	CGAGGATGGGGACAAGTATGCCCAGCTCCTAGTGGAGACAGACACCTTCGGTAGTCAAGT
A_24_P940006	2.99205	-2.99205	-1.58113	down	339.599	72.8525	-2.6252	-4.20633	Detected	Detected	0	NM_001406	NM_001406	NM_001406	Hs.26988	1949	EFNB3	ephrin-B3	ENST00000226091	THC2611490	GO:0005005(transmembrane-ephrin receptor activity)|GO:0005886(plasma membrane)|GO:0005887(integral to plasma membrane)|GO:0007267(cell-cell signaling)|GO:0007399(nervous system development)|GO:0007411(axon guidance)|GO:0007628(adult walking behavior)|GO:0016032(viral reproduction)|GO:0016198(axon choice point recognition)|GO:0046875(ephrin receptor binding)|GO:0048013(ephrin receptor signaling pa…	"Homo sapiens ephrin-B3 (EFNB3), mRNA [NM_001406]"	chr17:7614123-7614182	hs|17p13.1	TCTTGTTCTTTCCTTTCCATATCCCAGTATAATCTCTGTTAATCAACAGGACTACCCCAA
A_23_P81825	3.07011	-3.07011	-1.61829	down	93.8277	19.6166	-4.48095	-6.09924	Detected	Not Detected	0	NM_002098	NM_002098	NM_002098	Hs.446529	2979	GUCA1B	guanylate cyclase activator 1B (retina)	ENST00000230361	NP415103	"GO:0001917(photoreceptor inner segment)|GO:0005509(calcium ion binding)|GO:0007168(receptor guanylyl cyclase signaling pathway)|GO:0007267(cell-cell signaling)|GO:0007589(body fluid secretion)|GO:0007601(visual perception)|GO:0007603(phototransduction, visible light)|GO:0008048(calcium sensitive guanylate cyclase activator activity)|GO:0016056(rhodopsin mediated signaling pathway)|GO:0022400(reg…	"Homo sapiens guanylate cyclase activator 1B (retina) (GUCA1B), mRNA [NM_002098]"	chr6:42162371-42156430	hs|6p21.1	GAGCCTTCGACAAGAATGGGGACAACACCATCGACTTCCTGGAGTACGTGGCAGCTCTGA
A_24_P45476	3.13105	-3.13105	-1.64665	down	133.37	27.341	-3.9736	-5.62025	Detected	Not Detected	0	NM_002995	NM_002995	NM_002995	Hs.546295	6375	XCL1	chemokine (C motif) ligand 1	ENST00000367818	THC2476442	"GO:0001916(positive regulation of T cell mediated cytotoxicity)|GO:0002690(positive regulation of leukocyte chemotaxis)|GO:0002725(negative regulation of T cell cytokine production)|GO:0002726(positive regulation of T cell cytokine production)|GO:0002826(negative regulation of T-helper 1 type immune response)|GO:0005576(extracellular region)|GO:0005615(extracellular space)|GO:0006955(immune resp…	"Homo sapiens chemokine (C motif) ligand 1 (XCL1), mRNA [NM_002995]"	chr1:168550524-168550583	hs|1q24.2	AGTTTATACTCACCTTTTATGAAAGCACTGCATGAATAAAATTATTCCTTTGTATTTTTA
A_24_P114032	3.56738	-3.56738	-1.83487	down	786.147	141.449	-1.41423	-3.2491	Detected	Detected	0	NM_004952	NM_004952	NM_004952	Hs.516656	1944	EFNA3	ephrin-A3	ENST00000498667	THC2488713	GO:0005005(transmembrane-ephrin receptor activity)|GO:0005576(extracellular region)|GO:0005886(plasma membrane)|GO:0005887(integral to plasma membrane)|GO:0007267(cell-cell signaling)|GO:0007411(axon guidance)|GO:0031225(anchored to membrane)|GO:0046875(ephrin receptor binding)|GO:0048013(ephrin receptor signaling pathway)	"Homo sapiens ephrin-A3 (EFNA3), mRNA [NM_004952]"	chr1:155058670-155058936	hs|1q22	TCAACGTGCTGGAAGACTTTGAGGGAGAGAACCCTCAGGTGCCCAAGCTTGAGAAGAGCA
A_23_P121695	3.8728	-3.8728	-1.95338	down	89.7084	14.8681	-4.54572	-6.49909	Detected	Not Detected	0	NM_006419	NM_006419	NM_006419	Hs.100431	10563	CXCL13	chemokine (C-X-C motif) ligand 13	ENST00000286758	THC2465087	GO:0002467(germinal center formation)|GO:0002518(lymphocyte chemotaxis across high endothelial venule)|GO:0002544(chronic inflammatory response)|GO:0002920(regulation of humoral immune response)|GO:0005576(extracellular region)|GO:0005615(extracellular space)|GO:0006954(inflammatory response)|GO:0006955(immune response)|GO:0007166(cell surface receptor signaling pathway)|GO:0007186(G-protein coup…	"Homo sapiens chemokine (C-X-C motif) ligand 13 (CXCL13), mRNA [NM_006419]"	chr4:78532646-78532705	hs|4q21.1	CAAGAGGCAAAGGAATCCATGTAGTAGATATCCTCTGCTTAAAAACTCACTACGGAGGAG
A_33_P3347911	3.98263	-3.98263	-1.99372	down	98.0126	15.7965	-4.41799	-6.41171	Detected	Not Detected	0	NM_001271877	NM_001271877	NM_001271877	Hs.660607	2100	ESR2	estrogen receptor 2 (ER beta)	ENST00000344288	NP083886	"GO:0000122(negative regulation of transcription from RNA polymerase II promoter)|GO:0001046(core promoter sequence-specific DNA binding)|GO:0001541(ovarian follicle development)|GO:0001764(neuron migration)|GO:0003677(DNA binding)|GO:0003700(sequence-specific DNA binding transcription factor activity)|GO:0003707(steroid hormone receptor activity)|GO:0003713(transcription coactivator activity)|GO…	"Homo sapiens estrogen receptor 2 (ER beta) (ESR2), transcript variant g, mRNA [NM_001271877]"	chr14:64735617-64735558	hs|14q23.2	ATATTTGTCCAGCTACAAATCAGTGTACAATCGATAAAAACCGGCGCAAGAGCTGCCAGG
A_33_P3348719	4.06668	-4.06668	-2.02385	down	90.302	14.253	-4.5362	-6.56005	Detected	Not Detected	0	NM_002010	NM_002010	NM_002010	Hs.111	2254	FGF9	fibroblast growth factor 9	ENST00000382353	THC2610201	GO:0000122(negative regulation of transcription from RNA polymerase II promoter)|GO:0001525(angiogenesis)|GO:0001649(osteoblast differentiation)|GO:0002053(positive regulation of mesenchymal cell proliferation)|GO:0002062(chondrocyte differentiation)|GO:0005104(fibroblast growth factor receptor binding)|GO:0005576(extracellular region)|GO:0005604(basement membrane)|GO:0005615(extracellular space)…	"Homo sapiens fibroblast growth factor 9 (FGF9), mRNA [NM_002010]"	chr13:22278493-22278552	hs|13q12.11	AAATGGCTGCCTTCTGGTGTTTTTATTCTATTTCATCTCATTAACACTACAACCTTGTGT
A_23_P212830	4.60869	-4.60869	-2.20436	down	198.248	27.6108	-3.40172	-5.60608	Detected	Not Detected	0	NM_000142	NM_000142	NM_000142	Hs.1420	2261	FGFR3	fibroblast growth factor receptor 3	ENST00000260795	NP229416	GO:0000122(negative regulation of transcription from RNA polymerase II promoter)|GO:0000165(MAPK cascade)|GO:0001501(skeletal system development)|GO:0001938(positive regulation of endothelial cell proliferation)|GO:0001958(endochondral ossification)|GO:0002009(morphogenesis of an epithelium)|GO:0002062(chondrocyte differentiation)|GO:0002089(lens morphogenesis in camera-type eye)|GO:0003416(endoc…	"Homo sapiens fibroblast growth factor receptor 3 (FGFR3), transcript variant 1, mRNA [NM_000142]"	chr4:1809054-1809113	hs|4p16.3	CACTCCCCGGCATGAGACTCAGTGCAGATGGAGAGACAGCTACACAGAGCTTTGGTCTGT
A_23_P202334	2.91122	-2.91122	-1.54162	down	627.713	138.399	-1.73892	-3.28055	Detected	Detected	0	NM_022970	NM_022970	NM_022970	Hs.533683	2263	FGFR2	fibroblast growth factor receptor 2	ENST00000358487	NP319722	GO:0000122(negative regulation of transcription from RNA polymerase II promoter)|GO:0001525(angiogenesis)|GO:0001657(ureteric bud development)|GO:0001701(in utero embryonic development)|GO:0001837(epithelial to mesenchymal transition)|GO:0002053(positive regulation of mesenchymal cell proliferation)|GO:0003148(outflow tract septum morphogenesis)|GO:0003149(membranous septum morphogenesis)|GO:0004…	"Homo sapiens fibroblast growth factor receptor 2 (FGFR2), transcript variant 2, mRNA [NM_022970]"	chr10:123237843-123237830	hs|10q26.13	CAGCTGGCCTTCTGCTTCTGAGTTGCACATTAATCAGATTAGCCTGATTCTCTTCAGTGA
A_23_P167920	6.80016	-6.80016	-2.76557	down	490.375	46.2868	-2.09514	-4.86071	Detected	Not Detected	0	NM_005618	NM_005618	NM_005618	Hs.379912	28514	DLL1	delta-like 1 (Drosophila)	ENST00000616526	THC2470707	GO:0001709(cell fate determination)|GO:0001757(somite specification)|GO:0001947(heart looping)|GO:0005112(Notch binding)|GO:0005509(calcium ion binding)|GO:0005515(protein binding)|GO:0005576(extracellular region)|GO:0005886(plasma membrane)|GO:0005887(integral to plasma membrane)|GO:0007219(Notch signaling pathway)|GO:0007220(Notch receptor processing)|GO:0007267(cell-cell signaling)|GO:0007368(…	"Homo sapiens delta-like 1 (Drosophila) (DLL1), mRNA [NM_005618]"	chr6:170591701-170591642	hs|6q27	ATGGGTGAACTGAATTACGCCTAAGAAGCATGCACTGCCTGAGTGTATATTTTGGATTCT
A_33_P3212167	2.84118	-2.84118	-1.50649	down	147.589	33.3428	-3.82744	-5.33394	Detected	Not Detected	0	NM_001278344	NM_001278344	NM_001278344	Hs.498178	88	ACTN2	"actinin, alpha 2"	ENST00000546208	THC2467533	GO:0002576(platelet degranulation)|GO:0005178(integrin binding)|GO:0005509(calcium ion binding)|GO:0005515(protein binding)|GO:0005576(extracellular region)|GO:0005829(cytosol)|GO:0005856(cytoskeleton)|GO:0005884(actin filament)|GO:0005925(focal adhesion)|GO:0007155(cell adhesion)|GO:0007268(synaptic transmission)|GO:0007596(blood coagulation)|GO:0008092(cytoskeletal protein binding)|GO:0008307(s…	"Homo sapiens actinin, alpha 2 (ACTN2), transcript variant 3, mRNA [NM_001278344]"	chr1:236927181-236927240	hs|1q43	TATAATTCCCCCCTGTTTTTCCATCTTGTTGACAGCTTGTAGAGAATAAAGCAGGAATTC
A_33_P3287584	2.89585	-2.89585	-1.53399	down	3992.84	885.02	0.930311	-0.603675	Detected	Detected	0	NM_133471	NM_133471	NM_133471	Hs.101150	170954	PPP1R18	"protein phosphatase 1, regulatory subunit 18"	ENST00000615527	NP851514	GO:0003779(actin binding)|GO:0005737(cytoplasm)|GO:0005856(cytoskeleton)|GO:0019902(phosphatase binding)	"Homo sapiens protein phosphatase 1, regulatory subunit 18 (PPP1R18), transcript variant 1, mRNA [NM_133471]"	chr6:30652961-30652902	hs|6p21.33	AAAGAAGAGTGGCCAGTTCCAGGGGTAGCTCCAAAAGAGACTGCAGAGCTGTCCGAGACC
A_33_P3406072	2.91545	-2.91545	-1.54372	down	80.1949	17.6559	-4.70745	-6.25117	Detected	Not Detected	0	NM_001244959	NM_001244959	NM_001244959	Hs.127535	257019	FRMD3	FERM domain containing 3	ENST00000304195	THC2481809	GO:0005737(cytoplasm)|GO:0005856(cytoskeleton)|GO:0008092(cytoskeletal protein binding)|GO:0016021(integral to membrane)|GO:0019898(extrinsic to membrane)	"Homo sapiens FERM domain containing 3 (FRMD3), transcript variant 2, mRNA [NM_001244959]"	chr9:85863178-85863119	hs|9q21.32	TGAGGATCTGGAAGCAGATGAAAACGCCTTTTTGATTGCTGAAGAAGAGGAGCTGAAGGA
A_33_P3297244	2.96111	-2.96111	-1.56614	down	469.15	101.696	-2.15898	-3.72512	Detected	Detected	0	NM_139285	NM_139285	NM_139285	Hs.591194	246176	GAS2L2	growth arrest-specific 2 like 2	ENST00000618498	NP510511	GO:0001578(microtubule bundle formation)|GO:0001725(stress fiber)|GO:0005737(cytoplasm)|GO:0005856(cytoskeleton)|GO:0005874(microtubule)|GO:0007026(negative regulation of microtubule depolymerization)|GO:0007050(cell cycle arrest)|GO:0008017(microtubule binding)|GO:0008093(cytoskeletal adaptor activity)|GO:0051015(actin filament binding)	"Homo sapiens growth arrest-specific 2 like 2 (GAS2L2), mRNA [NM_139285]"	chr17:34077326-34077267	hs|17q12	TTCGAGACGGAGGACTTGGTGCTGCGCAAGAACGTGAAGAACGTGGTGCTGTGTTTGCTG
A_24_P165450	3.05647	-3.05647	-1.61187	down	1729.82	363.268	-0.276481	-1.88835	Detected	Detected	0	NM_024686	NM_024686	NM_024686	Hs.445826	79739	TTLL7	tubulin tyrosine ligase-like family member 7	ENST00000485638	NP600893	GO:0005737(cytoplasm)|GO:0005856(cytoskeleton)|GO:0005929(cilium)|GO:0007399(nervous system development)|GO:0016874(ligase activity)|GO:0018095(protein polyglutamylation)|GO:0030154(cell differentiation)|GO:0030425(dendrite)|GO:0043204(perikaryon)	"Homo sapiens tubulin tyrosine ligase-like family member 7 (TTLL7), mRNA [NM_024686]"	chr1:84369815-84356159	hs|1p31.1	ACCAAAGTGGCTTCATATTGGCTCATAAAATTGGACTCTGTAAAACAACGAAAAGTTTTG
A_33_P3327058	3.06532	-3.06532	-1.61604	down	1030.54	215.793	-1.0237	-2.63973	Detected	Detected	0	NM_001162383	NM_001162383	NM_001162383	Hs.743352	9181	ARHGEF2	Rho/Rac guanine nucleotide exchange factor (GEF) 2	ENST00000313667	THC2466712	GO:0000132(establishment of mitotic spindle orientation)|GO:0000902(cell morphogenesis)|GO:0005089(Rho guanyl-nucleotide exchange factor activity)|GO:0005515(protein binding)|GO:0005737(cytoplasm)|GO:0005794(Golgi apparatus)|GO:0005819(spindle)|GO:0005829(cytosol)|GO:0005856(cytoskeleton)|GO:0005874(microtubule)|GO:0005923(tight junction)|GO:0005925(focal adhesion)|GO:0006886(intracellular protei…	"Homo sapiens Rho/Rac guanine nucleotide exchange factor (GEF) 2 (ARHGEF2), transcript variant 1, mRNA [NM_001162383]"	chr1:155920241-155920182	hs|1q22	TGTCACTACTCGCTCTGTCCATCGAAACTTTGAGGACCGAGAGAGGCAGGAACTGGGGAG
A_24_P69095	3.13595	-3.13595	-1.6489	down	1093.05	223.727	-0.93874	-2.58764	Detected	Detected	0	NM_003633	NM_003633	NM_003633	Hs.744844	8507	ENC1	ectodermal-neural cortex 1 (with BTB domain)	ENST00000618628	THC2495238	GO:0000790(nuclear chromatin)|GO:0003779(actin binding)|GO:0005515(protein binding)|GO:0005634(nucleus)|GO:0005654(nucleoplasm)|GO:0005730(nucleolus)|GO:0005737(cytoplasm)|GO:0005856(cytoskeleton)|GO:0007275(multicellular organismal development)|GO:0007399(nervous system development)|GO:0010499(proteasomal ubiquitin-independent protein catabolic process)|GO:0010976(positive regulation of neuron p…	"Homo sapiens ectodermal-neural cortex 1 (with BTB domain) (ENC1), transcript variant 1, mRNA [NM_003633]"	chr5:73924314-73924255	hs|5q13.3	TTGTTTACTAAGCATGTGCCGTCGTAGGTATTAGTGCTAGTCTCAAATAGGTGCTTCCCC
A_33_P3358641	5.46679	-5.46679	-2.45069	down	5651.56	663.564	1.43155	-1.01915	Detected	Detected	0	NM_001137552	NM_001137552	NM_001137552	Hs.471779	9208	LRRFIP1	leucine rich repeat (in FLII) interacting protein 1	ENST00000392000	THC2486418	"GO:0003677(DNA binding)|GO:0003725(double-stranded RNA binding)|GO:0005515(protein binding)|GO:0005575(cellular_component)|GO:0005634(nucleus)|GO:0005737(cytoplasm)|GO:0005829(cytosol)|GO:0005856(cytoskeleton)|GO:0005886(plasma membrane)|GO:0006351(transcription, DNA-dependent)|GO:0006357(regulation of transcription from RNA polymerase II promoter)|GO:0008150(biological_process)|GO:0032481(posit…	"Homo sapiens leucine rich repeat (in FLII) interacting protein 1 (LRRFIP1), transcript variant 3, mRNA [NM_001137552]"	chr2:238672559-238672618	hs|2q37.3	TCACAGGACATTAGTGATGCCTGTGAAGCAGAAAGTACAGAGAGGTGTGAGATGTCAGAA
A_23_P358394	3.63054	-3.63054	-1.86019	down	114.943	20.3216	-4.18811	-6.0483	Detected	Not Detected	0	NM_015864	NM_015864	NM_015864	Hs.559459	9750	FAM65B	"family with sequence similarity 65, member B"	ENST00000612873	THC2473399	GO:0005515(protein binding)|GO:0005737(cytoplasm)|GO:0005739(mitochondrion)|GO:0005856(cytoskeleton)|GO:0007517(muscle organ development)|GO:0007605(sensory perception of sound)|GO:0030154(cell differentiation)|GO:0030175(filopodium)|GO:0060171(stereocilium membrane)	"Homo sapiens family with sequence similarity 65, member B (FAM65B), transcript variant 2, mRNA [NM_015864]"	chr6:24843154-24843095	hs|6p22.3	AAGAGCAGTATAAAGAGTTTCAGGATCTGAACCAAGAAGTCATGAATTTGGATGATATTC
A_23_P333852	3.96286	-3.96286	-1.98654	down	134.945	21.8572	-3.95666	-5.9432	Detected	Not Detected	0	NM_194252	NM_194252	NM_194252	Hs.640663	158135	TTLL11	tubulin tyrosine ligase-like family member 11	ENST00000373776	THC2475905	GO:0005737(cytoplasm)|GO:0005856(cytoskeleton)|GO:0005929(cilium)|GO:0006464(cellular protein modification process)|GO:0016874(ligase activity)	"Homo sapiens tubulin tyrosine ligase-like family member 11 (TTLL11), transcript variant 2, mRNA [NM_194252]"	chr9:124751865-124751806	hs|9q33.2	AGCTCAAGTTTGATATTCGTCTGTATGTCTTACTCAAGTCCTTAGACCCCTTAGAGATTT
A_33_P3423121	3.96974	-3.96974	-1.98904	down	595.384	96.268	-1.81521	-3.80426	Detected	Detected	0	NM_001260492	NM_001260492	NM_001260492	Hs.263671	5962	RDX	radixin		THC2635715	GO:0001726(ruffle)|GO:0003779(actin binding)|GO:0005515(protein binding)|GO:0005615(extracellular space)|GO:0005737(cytoplasm)|GO:0005856(cytoskeleton)|GO:0005886(plasma membrane)|GO:0005925(focal adhesion)|GO:0010628(positive regulation of gene expression)|GO:0019898(extrinsic to membrane)|GO:0030027(lamellipodium)|GO:0030033(microvillus assembly)|GO:0030175(filopodium)|GO:0030315(T-tubule)|GO:0…	"Homo sapiens radixin (RDX), transcript variant 1, mRNA [NM_001260492]"	chr11:110066370-110066311	hs|11q22.3	GCAGAAATCGATGCAACATTTCTTTCCTGTCTGGGCTGTTTGTATAATTGTATATAAATG
A_24_P165450	3.05647	-3.05647	-1.61187	down	1729.82	363.268	-0.276481	-1.88835	Detected	Detected	0	NM_024686	NM_024686	NM_024686	Hs.445826	79739	TTLL7	tubulin tyrosine ligase-like family member 7	ENST00000485638	NP600893	GO:0005737(cytoplasm)|GO:0005856(cytoskeleton)|GO:0005929(cilium)|GO:0007399(nervous system development)|GO:0016874(ligase activity)|GO:0018095(protein polyglutamylation)|GO:0030154(cell differentiation)|GO:0030425(dendrite)|GO:0043204(perikaryon)	"Homo sapiens tubulin tyrosine ligase-like family member 7 (TTLL7), mRNA [NM_024686]"	chr1:84369815-84356159	hs|1p31.1	ACCAAAGTGGCTTCATATTGGCTCATAAAATTGGACTCTGTAAAACAACGAAAAGTTTTG
A_23_P111311	4.02658	-4.02658	-2.00956	down	27931.8	4452.56	3.73673	1.72718	Detected	Detected	0	NM_144497	NM_144497	NM_144497	Hs.371240	9590	AKAP12	A kinase (PRKA) anchor protein 12	ENST00000253332	THC2599416	GO:0005515(protein binding)|GO:0005737(cytoplasm)|GO:0005856(cytoskeleton)|GO:0005886(plasma membrane)|GO:0005925(focal adhesion)|GO:0005938(cell cortex)|GO:0006605(protein targeting)|GO:0007186(G-protein coupled receptor signaling pathway)|GO:0008179(adenylate cyclase binding)|GO:0010739(positive regulation of protein kinase A signaling cascade)|GO:0030819(positive regulation of cAMP biosyntheti…	"Homo sapiens A kinase (PRKA) anchor protein 12 (AKAP12), transcript variant 2, mRNA [NM_144497]"	chr6:151674814-151674873	hs|6q25.1	CACAGGAGGAGTTACAGAAACAAGAGAGAGAATCTGCAAAGTCAGAACTTACAGAATCTT
A_33_P3358641	5.46679	-5.46679	-2.45069	down	5651.56	663.564	1.43155	-1.01915	Detected	Detected	0	NM_001137552	NM_001137552	NM_001137552	Hs.471779	9208	LRRFIP1	leucine rich repeat (in FLII) interacting protein 1	ENST00000392000	THC2486418	"GO:0003677(DNA binding)|GO:0003725(double-stranded RNA binding)|GO:0005515(protein binding)|GO:0005575(cellular_component)|GO:0005634(nucleus)|GO:0005737(cytoplasm)|GO:0005829(cytosol)|GO:0005856(cytoskeleton)|GO:0005886(plasma membrane)|GO:0006351(transcription, DNA-dependent)|GO:0006357(regulation of transcription from RNA polymerase II promoter)|GO:0008150(biological_process)|GO:0032481(posit…	"Homo sapiens leucine rich repeat (in FLII) interacting protein 1 (LRRFIP1), transcript variant 3, mRNA [NM_001137552]"	chr2:238672559-238672618	hs|2q37.3	TCACAGGACATTAGTGATGCCTGTGAAGCAGAAAGTACAGAGAGGTGTGAGATGTCAGAA
A_33_P3234849	2.51722	2.51722	1.33183	up	222.049	358.771	-3.23816	-1.90632	Detected	Detected	0	NM_007124	NM_007124	NM_007124	Hs.133135	7402	UTRN	utrophin	ENST00000465299	THC2536486	GO:0001954(positive regulation of cell-matrix adhesion)|GO:0003779(actin binding)|GO:0005178(integrin binding)|GO:0005515(protein binding)|GO:0005654(nucleoplasm)|GO:0005737(cytoplasm)|GO:0005856(cytoskeleton)|GO:0005886(plasma membrane)|GO:0006936(muscle contraction)|GO:0007517(muscle organ development)|GO:0008270(zinc ion binding)|GO:0016010(dystrophin-associated glycoprotein complex)|GO:001602…	"Homo sapiens utrophin (UTRN), mRNA [NM_007124]"	chr6:145157529-145157588	hs|6q24.2	ATCACACGTCTGAGGATTCAGAACTTATAGCAGAAGCAAAACTCCTCAGGCAGCACAAAG
A_24_P331779	6.1568	-6.1568	-2.62218	down	472.39	49.2485	-2.14905	-4.77123	Detected	Not Detected	0	NM_001010892	NM_001010892	NM_001010892	Hs.160380	345895	RSPH4A	radial spoke head 4 homolog A (Chlamydomonas)	ENST00000368581	NP1459086	GO:0001534(radial spoke)|GO:0003341(cilium movement)|GO:0003674(molecular_function)|GO:0005634(nucleus)|GO:0005654(nucleoplasm)|GO:0005730(nucleolus)|GO:0005856(cytoskeleton)|GO:0005930(axoneme)|GO:0031514(motile cilium)|GO:0035082(axoneme assembly)	"Homo sapiens radial spoke head 4 homolog A (Chlamydomonas) (RSPH4A), transcript variant 1, mRNA [NM_001010892]"	chr6:116949416-116949475	hs|6q22.1	GCAGAAGGTGGGCGAAATAGCTTTGAGGAAAACCCTGATTTTGAAGGCATCCAAGTGATT
A_33_P3283044	6.98527	-6.98527	-2.80432	down	1518.37	139.522	-0.464577	-3.26889	Detected	Detected	0	NM_015210	NM_015210	NM_015210	Hs.707920	23255	MTCL1	microtubule crosslinking factor 1	ENST00000400050	THC2477429	GO:0000922(spindle pole)|GO:0001578(microtubule bundle formation)|GO:0005515(protein binding)|GO:0005615(extracellular space)|GO:0005737(cytoplasm)|GO:0005856(cytoskeleton)|GO:0008017(microtubule binding)|GO:0010506(regulation of autophagy)|GO:0016324(apical plasma membrane)|GO:0016327(apicolateral plasma membrane)|GO:0016328(lateral plasma membrane)|GO:0030496(midbody)|GO:0042803(protein homodim…	"Homo sapiens microtubule crosslinking factor 1 (MTCL1), mRNA [NM_015210]"	chr18:8831943-8832002	hs|18p11.22	GTTCAACCTGTGAAACTGAGATGTTTCTAGAATGAAACAGTAAATGTGCCTGTAATAACT
A_33_P3212167	2.84118	-2.84118	-1.50649	down	147.589	33.3428	-3.82744	-5.33394	Detected	Not Detected	0	NM_001278344	NM_001278344	NM_001278344	Hs.498178	88	ACTN2	"actinin, alpha 2"	ENST00000546208	THC2467533	GO:0002576(platelet degranulation)|GO:0005178(integrin binding)|GO:0005509(calcium ion binding)|GO:0005515(protein binding)|GO:0005576(extracellular region)|GO:0005829(cytosol)|GO:0005856(cytoskeleton)|GO:0005884(actin filament)|GO:0005925(focal adhesion)|GO:0007155(cell adhesion)|GO:0007268(synaptic transmission)|GO:0007596(blood coagulation)|GO:0008092(cytoskeletal protein binding)|GO:0008307(s…	"Homo sapiens actinin, alpha 2 (ACTN2), transcript variant 3, mRNA [NM_001278344]"	chr1:236927181-236927240	hs|1q43	TATAATTCCCCCCTGTTTTTCCATCTTGTTGACAGCTTGTAGAGAATAAAGCAGGAATTC
A_33_P3395688	2.84202	-2.84202	-1.50692	down	73.8198	16.6722	-4.82695	-6.33387	Detected	Not Detected	0	NM_001018100	NM_001018100	NM_001018100	Hs.437256	100820829	MYZAP	myocardial zonula adherens protein	ENST00000380568	NP1072819	GO:0005515(protein binding)|GO:0030018(Z disc)|GO:0030054(cell junction)|GO:0030864(cortical actin cytoskeleton)|GO:0031234(extrinsic to internal side of plasma membrane)|GO:0031674(I band)|GO:0035556(intracellular signal transduction)	"Homo sapiens myocardial zonula adherens protein (MYZAP), transcript variant 1, mRNA [NM_001018100]"	chr15:57967187-57967246	hs|15q21.3	TTGGACTATTTAACAGAAACCCAGGCCAAGACTGAAGTGGAAACCAGAGAGATAGGAGTG
A_33_P3288609	2.86872	-2.86872	-1.52041	down	75.5718	16.909	-4.79311	-6.31352	Detected	Not Detected	0	ENST00000526968				5058	PAK1	p21 protein (Cdc42/Rac)-activated kinase 1	ENST00000526968		GO:0000165(MAPK cascade)|GO:0000278(mitotic cell cycle)|GO:0001666(response to hypoxia)|GO:0001726(ruffle)|GO:0001934(positive regulation of protein phosphorylation)|GO:0004672(protein kinase activity)|GO:0004674(protein serine/threonine kinase activity)|GO:0004702(receptor signaling protein serine/threonine kinase activity)|GO:0005515(protein binding)|GO:0005518(collagen binding)|GO:0005524(ATP …	p21 protein (Cdc42/Rac)-activated kinase 1 [Source:HGNC Symbol;Acc:HGNC:8590] [ENST00000526968]	chr11:77185567-77185508	hs|11q14.1	ATCCTGACTACTACAGTAGCCCTCCCAGAAATCGTCCCAAAATTGTCTGATAGAAAGGCT
A_33_P3303245	3.08622	-3.08622	-1.62584	down	68.6835	14.2848	-4.931	-6.55683	Detected	Not Detected	0	NM_001093772	NM_001093772	NM_001093772	Hs.479754	3815	KIT	v-kit Hardy-Zuckerman 4 feline sarcoma viral oncogene homolog	ENST00000288135	THC2618211	GO:0000187(activation of MAPK activity)|GO:0001541(ovarian follicle development)|GO:0001669(acrosomal vesicle)|GO:0002020(protease binding)|GO:0002318(myeloid progenitor cell differentiation)|GO:0002320(lymphoid progenitor cell differentiation)|GO:0002327(immature B cell differentiation)|GO:0002371(dendritic cell cytokine production)|GO:0002551(mast cell chemotaxis)|GO:0004713(protein tyrosine ki…	"Homo sapiens v-kit Hardy-Zuckerman 4 feline sarcoma viral oncogene homolog (KIT), transcript variant 2, mRNA [NM_001093772]"	chr4:55569965-55570024	hs|4q12	AGTTCAGCGAGAGTTAATGATTCTGGAGTGTTCATGTGTTATGCCAATAATACTTTTGGA
A_33_P3337242	2.00546	-2.00546	-1.00393	down	2910.72	931.61	0.474273	-0.529658	Detected	Detected	0	NM_001271667	NM_001271667	NM_001271667	Hs.571148	84062	DTNBP1	dystrobrevin binding protein 1	ENST00000513680	THC2625453	GO:0001956(positive regulation of neurotransmitter secretion)|GO:0005515(protein binding)|GO:0005634(nucleus)|GO:0005737(cytoplasm)|GO:0005789(endoplasmic reticulum membrane)|GO:0005829(cytosol)|GO:0006892(post-Golgi vesicle-mediated transport)|GO:0007596(blood coagulation)|GO:0008089(anterograde axon cargo transport)|GO:0010008(endosome membrane)|GO:0010628(positive regulation of gene expression…	"Homo sapiens dystrobrevin binding protein 1 (DTNBP1), transcript variant 3, mRNA [NM_001271667]"	chr6:15524832-15524773	hs|6p22.3	ATATCGGACCAGGAGGCCCTGGACGTCTTCCTGAACTCTGGAGGAGAAGAGAACACTGTG
A_23_P210515	4.06462	-4.06462	-2.02312	down	834.478	131.778	-1.32816	-3.35128	Detected	Detected	0	NM_020967	NM_020967	NM_020967	Hs.654991	57727	NCOA5	nuclear receptor coactivator 5	ENST00000290231	THC2484698	"GO:0003682(chromatin binding)|GO:0005515(protein binding)|GO:0005615(extracellular space)|GO:0005634(nucleus)|GO:0005654(nucleoplasm)|GO:0006351(transcription, DNA-dependent)|GO:0006355(regulation of transcription, DNA-dependent)|GO:0015629(actin cytoskeleton)|GO:0042593(glucose homeostasis)|GO:0046627(negative regulation of insulin receptor signaling pathway)"	"Homo sapiens nuclear receptor coactivator 5 (NCOA5), mRNA [NM_020967]"	chr20:44690371-44690312	hs|20q13.12	CCATGGCAGCCACAGAAAAAAGAATTTTTCTCTCTGAGCCAAGGTTGTTTTTTGTTTTTT
A_23_P89727	2.89088	-2.89088	-1.53151	down	243.626	54.093	-3.10436	-4.63587	Detected	Not Detected	0	NM_048368	NM_048368	NM_048368	Hs.465490	9150	CTDP1	"CTD (carboxy-terminal domain, RNA polymerase II, polypeptide A) phosphatase, subunit 1"	ENST00000075430	THC2735040	GO:0000922(spindle pole)|GO:0003899(DNA-directed RNA polymerase activity)|GO:0005654(nucleoplasm)|GO:0005737(cytoplasm)|GO:0005813(centrosome)|GO:0005819(spindle)|GO:0006366(transcription from RNA polymerase II promoter)|GO:0006368(transcription elongation from RNA polymerase II promoter)|GO:0006470(protein dephosphorylation)|GO:0008420(CTD phosphatase activity)|GO:0010458(exit from mitosis)|GO:0…	"Homo sapiens CTD (carboxy-terminal domain, RNA polymerase II, polypeptide A) phosphatase, subunit 1 (CTDP1), transcript variant 2, mRNA [NM_048368]"	chr18:77475245-77475304	hs|18q23	GATCCTGGTCCGTGTACACACTGACTACTATGCCAAGTATGACCGCTACCTCAACAAGGA
A_23_P257583	2.94289	-2.94289	-1.55723	down	1577.05	343.968	-0.409877	-1.96711	Detected	Detected	0	NM_015689	NM_015689	NM_015689	Hs.6385	27147	DENND2A	DENN/MADD domain containing 2A	ENST00000496613	THC2601539	"GO:0005737(cytoplasm)|GO:0015031(protein transport)|GO:0015629(actin cytoskeleton)|GO:0017112(Rab guanyl-nucleotide exchange factor activity)|GO:0032851(positive regulation of Rab GTPase activity)|GO:0042147(retrograde transport, endosome to Golgi)"	"Homo sapiens DENN/MADD domain containing 2A (DENND2A), mRNA [NM_015689]"	chr7:140218518-140218459	hs|7q34	CACAAGAAATAACTCTCAGCCTCAAGGGAAAACTTCCTCCTAGTGCAGCCCTATTCTTTA
A_21_P0010602	2.67633	-2.67633	-1.42025	down	65.6805	15.7523	-4.99549	-6.41575	Detected	Not Detected	0	NM_014675	NM_014675	NM_014675	Hs.309403	9696	CROCC	"ciliary rootlet coiled-coil, rootletin"	ENST00000362058	NP1154880	GO:0005198(structural molecule activity)|GO:0005515(protein binding)|GO:0005737(cytoplasm)|GO:0005813(centrosome)|GO:0005814(centriole)|GO:0005886(plasma membrane)|GO:0007049(cell cycle)|GO:0008104(protein localization)|GO:0010457(centriole-centriole cohesion)|GO:0015629(actin cytoskeleton)|GO:0019894(kinesin binding)|GO:0030030(cell projection organization)|GO:0033365(protein localization to org…	"Homo sapiens ciliary rootlet coiled-coil, rootletin (CROCC), mRNA [NM_014675]"	chr1:17264179-17264900	hs|1p36.13	AATCTGGAGAAGGATCAGGTCGACAAGGACCTCACCGAGAAGCTTGAGGCCCTGGAATCC
A_33_P3413671	3.64638	-3.64638	-1.86647	down	6886.72	1212.27	1.71671	-0.149751	Detected	Detected	0	NM_007314	NM_007314	NM_007314	Hs.159472	27	ABL2	"ABL proto-oncogene 2, non-receptor tyrosine kinase"	ENST00000344730	THC2492412	"GO:0000287(magnesium ion binding)|GO:0001891(phagocytic cup)|GO:0003785(actin monomer binding)|GO:0004672(protein kinase activity)|GO:0004713(protein tyrosine kinase activity)|GO:0004715(non-membrane spanning protein tyrosine kinase activity)|GO:0005102(receptor binding)|GO:0005515(protein binding)|GO:0005524(ATP binding)|GO:0005829(cytosol)|GO:0006464(cellular protein modification process)|GO:0…	"Homo sapiens ABL proto-oncogene 2, non-receptor tyrosine kinase (ABL2), transcript variant b, mRNA [NM_007314]"	chr1:179073242-179073183	hs|1q25.2	AACACCTAGTCTAGGGATGCACAGCAGAATCCCCTAGGGTTAAAAAACAAAACAAAACAA
A_23_P155900	3.20202	-3.20202	-1.67898	down	207.645	41.624	-3.33491	-5.0139	Detected	Not Detected	0	NM_053036	NM_053036	NM_053036	Hs.99231	10886	NPFFR2	neuropeptide FF receptor 2	ENST00000344413	THC2747901	GO:0004930(G-protein coupled receptor activity)|GO:0005886(plasma membrane)|GO:0005887(integral to plasma membrane)|GO:0007186(G-protein coupled receptor signaling pathway)|GO:0007218(neuropeptide signaling pathway)|GO:0007268(synaptic transmission)|GO:0008188(neuropeptide receptor activity)|GO:0009582(detection of abiotic stimulus)|GO:0015629(actin cytoskeleton)|GO:0031628(opioid receptor bindin…	"Homo sapiens neuropeptide FF receptor 2 (NPFFR2), transcript variant 2, mRNA [NM_053036]"	chr4:73013257-73013316	hs|4q13.3	ATCATTTATGGTTTCTTCAACGAGAATTTCCGCCGTGGTTTCCAAGAAGCTTTCCAGCTC
A_23_P35349	3.61862	-3.61862	-1.85544	down	1473.23	261.32	-0.508123	-2.36356	Detected	Detected	0	NM_021738	NM_021738	NM_021738	Hs.499209	6840	SVIL	supervillin	ENST00000355867	THC2558268	GO:0002102(podosome)|GO:0005515(protein binding)|GO:0005634(nucleus)|GO:0005737(cytoplasm)|GO:0005886(plasma membrane)|GO:0005925(focal adhesion)|GO:0007010(cytoskeleton organization)|GO:0007519(skeletal muscle tissue development)|GO:0015629(actin cytoskeleton)|GO:0030496(midbody)|GO:0032154(cleavage furrow)|GO:0032467(positive regulation of cytokinesis)|GO:0043034(costamere)|GO:0051015(actin fil…	"Homo sapiens supervillin (SVIL), transcript variant 2, mRNA [NM_021738]"	chr10:29747064-29747005	hs|10p11.23	GTTTTCAGAACCTGACATTGTTAAAGATACTGCTTGTCCCGGAGTTGTGTATTTTGTAAA
A_23_P210515	4.06462	-4.06462	-2.02312	down	834.478	131.778	-1.32816	-3.35128	Detected	Detected	0	NM_020967	NM_020967	NM_020967	Hs.654991	57727	NCOA5	nuclear receptor coactivator 5	ENST00000290231	THC2484698	"GO:0003682(chromatin binding)|GO:0005515(protein binding)|GO:0005615(extracellular space)|GO:0005634(nucleus)|GO:0005654(nucleoplasm)|GO:0006351(transcription, DNA-dependent)|GO:0006355(regulation of transcription, DNA-dependent)|GO:0015629(actin cytoskeleton)|GO:0042593(glucose homeostasis)|GO:0046627(negative regulation of insulin receptor signaling pathway)"	"Homo sapiens nuclear receptor coactivator 5 (NCOA5), mRNA [NM_020967]"	chr20:44690371-44690312	hs|20q13.12	CCATGGCAGCCACAGAAAAAAGAATTTTTCTCTCTGAGCCAAGGTTGTTTTTTGTTTTTT
A_33_P3362321	4.47659	-4.47659	-2.1624	down	26842.7	3848.82	3.67936	1.51696	Detected	Detected	0	NM_201555	NM_201555	NM_201555	Hs.443687	2274	FHL2	four and a half LIM domains 2	ENST00000452732	THC2514450	"GO:0000122(negative regulation of transcription from RNA polymerase II promoter)|GO:0001649(osteoblast differentiation)|GO:0003713(transcription coactivator activity)|GO:0005515(protein binding)|GO:0005634(nucleus)|GO:0005654(nucleoplasm)|GO:0005925(focal adhesion)|GO:0006351(transcription, DNA-dependent)|GO:0008134(transcription factor binding)|GO:0008270(zinc ion binding)|GO:0009725(response t…	"Homo sapiens four and a half LIM domains 2 (FHL2), transcript variant 2, mRNA [NM_201555]"	chr2:105990080-105990021	hs|2q12.1	TACAGACTGCTATTCCAACGAGTACTCATCCAAGTGCCAGGAATGCAAGAAGACCATCAT
A_24_P36299	4.48031	-4.48031	-2.1636	down	1075.51	154.083	-0.962081	-3.12568	Detected	Detected	0	NM_004491	NM_004491	NM_004491	Hs.509447	2909	ARHGAP35	Rho GTPase activating protein 35	ENST00000599284	THC2463612	"GO:0000122(negative regulation of transcription from RNA polymerase II promoter)|GO:0000977(RNA polymerase II regulatory region sequence-specific DNA binding)|GO:0001227(RNA polymerase II transcription regulatory region sequence-specific DNA binding transcription factor activity involved in negative regulation of transcription)|GO:0001843(neural tube closure)|GO:0003677(DNA binding)|GO:0003714(t…	"Homo sapiens Rho GTPase activating protein 35 (ARHGAP35), mRNA [NM_004491]"	chr19:47502621-47503601	hs|19q13.32	AGGAAAACCACGAAGTCTTCAAGTATGTCATCTCTCACCTAAACAAGGTCAGCCACAACA
A_33_P3395738	2.58847	-2.58847	-1.3721	down	3576.71	886.925	0.771529	-0.600573	Detected	Detected	0	AK127004		AK127004	Hs.736013	9564	BCAR1	breast cancer anti-estrogen resistance 1		THC2605333	GO:0001558(regulation of cell growth)|GO:0001726(ruffle)|GO:0004871(signal transducer activity)|GO:0005515(protein binding)|GO:0005730(nucleolus)|GO:0005737(cytoplasm)|GO:0005829(cytosol)|GO:0005886(plasma membrane)|GO:0005925(focal adhesion)|GO:0007015(actin filament organization)|GO:0007155(cell adhesion)|GO:0007173(epidermal growth factor receptor signaling pathway)|GO:0007186(G-protein couple…	"Homo sapiens cDNA FLJ45059 fis, clone BRAWH3023274. [AK127004]"	chr16:75280329-75280270	hs|16q23.1	CCCACTTTCTTCCCCGTGAAAGCAAATTGTTTGGTGTCTTTCTGTCCCACTACAGTATAG
A_23_P121795	5.53622	-5.53622	-2.4689	down	2935.95	340.395	0.486723	-1.98218	Detected	Detected	0	NM_021069	NM_021069	NM_021069	Hs.655143	8470	SORBS2	sorbin and SH3 domain containing 2	ENST00000284776	THC2482472	GO:0005200(structural constituent of cytoskeleton)|GO:0005515(protein binding)|GO:0005634(nucleus)|GO:0005886(plasma membrane)|GO:0007015(actin filament organization)|GO:0007155(cell adhesion)|GO:0008093(cytoskeletal adaptor activity)|GO:0008150(biological_process)|GO:0008307(structural constituent of muscle)|GO:0015629(actin cytoskeleton)|GO:0016477(cell migration)|GO:0019904(protein domain spec…	"Homo sapiens sorbin and SH3 domain containing 2 (SORBS2), transcript variant 2, mRNA [NM_021069]"	chr4:186515040-186510881	hs|4q35.1	CGTTTCAGGCTCTGTATAACTATACTCCCAGGAATGAAGATGAGCTGGAGCTCAGAGAAA
A_33_P3371650	5.54322	-5.54322	-2.47072	down	737.23	85.3666	-1.50692	-3.97764	Detected	Detected	0	BC052561		BC052561	Hs.88297	9262	STK17B	serine/threonine kinase 17b		THC2520318	GO:0004672(protein kinase activity)|GO:0004674(protein serine/threonine kinase activity)|GO:0005524(ATP binding)|GO:0005634(nucleus)|GO:0005793(endoplasmic reticulum-Golgi intermediate compartment)|GO:0005886(plasma membrane)|GO:0006468(protein phosphorylation)|GO:0006915(apoptotic process)|GO:0015629(actin cytoskeleton)|GO:0035556(intracellular signal transduction)|GO:0046777(protein autophospho…	"Homo sapiens serine/threonine kinase 17b (apoptosis-inducing), mRNA (cDNA clone IMAGE:6280720), partial cds. [BC052561]"	chr2:197034187-197034128	hs|2q32.3	CACTTTCACTTAATCGTTAAATTGCCTTAAAATTGCATGCATAGTATATTGTAATTCACA
A_33_P3423984	5.75732	-5.75732	-2.5254	down	123.231	13.7387	-4.08766	-6.61306	Detected	Not Detected	0	ENST00000508898		AK096458	Hs.151220	23022	PALLD	"palladin, cytoskeletal associated protein"	ENST00000508898	THC2490551	GO:0001726(ruffle)|GO:0003779(actin binding)|GO:0005515(protein binding)|GO:0005634(nucleus)|GO:0005737(cytoplasm)|GO:0005739(mitochondrion)|GO:0005884(actin filament)|GO:0005886(plasma membrane)|GO:0005925(focal adhesion)|GO:0007010(cytoskeleton organization)|GO:0015629(actin cytoskeleton)|GO:0030018(Z disc)|GO:0030027(lamellipodium)|GO:0051371(muscle alpha-actinin binding)	"palladin, cytoskeletal associated protein [Source:HGNC Symbol;Acc:HGNC:17068] [ENST00000508898]"	chr4:169621207-169621266	hs|4q32.3	GATGAAAATTCAGTATTACAACCTGGCTCATCTCATTTCCTCATGGCTTTCTTCATTTTT
A_24_P193600	6.97752	-6.97752	-2.80271	down	281.859	25.9285	-2.89406	-5.69677	Detected	Not Detected	0	NM_003450	NM_003450	NM_003450	Hs.155204	7727	ZNF174	zinc finger protein 174	ENST00000571936	THC2471169	"GO:0000122(negative regulation of transcription from RNA polymerase II promoter)|GO:0000981(sequence-specific DNA binding RNA polymerase II transcription factor activity)|GO:0003700(sequence-specific DNA binding transcription factor activity)|GO:0005634(nucleus)|GO:0005654(nucleoplasm)|GO:0005737(cytoplasm)|GO:0006366(transcription from RNA polymerase II promoter)|GO:0015629(actin cytoskeleton)|…	"Homo sapiens zinc finger protein 174 (ZNF174), transcript variant 1, mRNA [NM_003450]"	chr16:3458426-3458485	hs|16p13.3	TGCAGAATCCTGAACCAAGAGGGGCAAATATGAGTGAACCTCGGTTGTCACGGAGGCAGG
A_33_P3327852	2.91089	-2.91089	-1.54146	down	4495.45	991.277	1.10136	-0.440097	Detected	Detected	0	NM_030808	NM_030808	NM_030808	Hs.372123	81565	NDEL1	nudE neurodevelopment protein 1-like 1	ENST00000402554	THC2578321	GO:0000132(establishment of mitotic spindle orientation)|GO:0000278(mitotic cell cycle)|GO:0000776(kinetochore)|GO:0000777(condensed chromosome kinetochore)|GO:0001764(neuron migration)|GO:0001833(inner cell mass cell proliferation)|GO:0005515(protein binding)|GO:0005635(nuclear envelope)|GO:0005730(nucleolus)|GO:0005737(cytoplasm)|GO:0005813(centrosome)|GO:0005819(spindle)|GO:0005829(cytosol)|GO…	"Homo sapiens nudE neurodevelopment protein 1-like 1 (NDEL1), transcript variant 2, mRNA [NM_030808]"	chr17:8363418-8363477	hs|17p13.1	TGCTGAATGGCAATGGCACAAAGTTCTCTCGATCAGGGCATACATCTTTCTTCGACAAAG
A_33_P3358233	2.98601	-2.98601	-1.57822	down	538.735	115.806	-1.95946	-3.53768	Detected	Detected	0	NM_006617	NM_006617	NM_006617	Hs.527971	10763	NES	nestin	ENST00000368223	NP286942	GO:0000086(G2/M transition of mitotic cell cycle)|GO:0003674(molecular_function)|GO:0005198(structural molecule activity)|GO:0005737(cytoplasm)|GO:0005882(intermediate filament)|GO:0007417(central nervous system development)|GO:0007420(brain development)|GO:0019215(intermediate filament binding)|GO:0030844(positive regulation of intermediate filament depolymerization)|GO:0031076(embryonic camera-…	"Homo sapiens nestin (NES), mRNA [NM_006617]"	chr1:156639481-156639422	hs|1q23.1	AAGAGTCTGACCCTGTTTCCTTGGAGAGGGAGGACAAAGTCCCTGGCCCTCTAGAGATCC
A_23_P60354	3.83072	-3.83072	-1.93762	down	5754.57	964.227	1.45761	-0.480012	Detected	Detected	0	NM_139045	NM_139045	NM_139045	Hs.298990	6595	SMARCA2	"SWI/SNF related, matrix associated, actin dependent regulator of chromatin, subfamily a, member 2"	ENST00000382183	NP095106	"GO:0000122(negative regulation of transcription from RNA polymerase II promoter)|GO:0000790(nuclear chromatin)|GO:0001105(RNA polymerase II transcription coactivator activity)|GO:0003713(transcription coactivator activity)|GO:0004386(helicase activity)|GO:0005515(protein binding)|GO:0005524(ATP binding)|GO:0005634(nucleus)|GO:0005654(nucleoplasm)|GO:0006325(chromatin organization)|GO:0006338(chr…	"Homo sapiens SWI/SNF related, matrix associated, actin dependent regulator of chromatin, subfamily a, member 2 (SMARCA2), transcript variant 2, mRNA [NM_139045]"	chr9:2192841-2192900	hs|9p24.3	TATCATCATCGTCTATAAACTAGCTTTAGGATAGTGCCAGACAAACATATGATATCATGG
A_23_P301138	2.17435	2.17435	1.12058	up	9092.79	12690.3	2.11762	3.2382	Detected	Detected	0	NM_001005910	NM_001005910	NM_001005910	Hs.595983	51447	IP6K2	inositol hexakisphosphate kinase 2	ENST00000416707	THC2551781	"GO:0000832(inositol hexakisphosphate 5-kinase activity)|GO:0005524(ATP binding)|GO:0005634(nucleus)|GO:0005654(nucleoplasm)|GO:0006817(phosphate ion transport)|GO:0008440(inositol-1,4,5-trisphosphate 3-kinase activity)|GO:0019221(cytokine-mediated signaling pathway)|GO:0030308(negative regulation of cell growth)|GO:0043065(positive regulation of apoptotic process)|GO:0043647(inositol phosphate m…	"Homo sapiens inositol hexakisphosphate kinase 2 (IP6K2), transcript variant 3, mRNA [NM_001005910]"	chr3:48731295-48731236	hs|3p21.31	CTGTGCTCCCCAACCAGCTCTATCTGCCTTGTGTTCATTTTGTTATTTTGTGACGTGAGA
A_23_P148015	3.13083	-3.13083	-1.64654	down	140.632	28.8318	-3.89711	-5.54365	Detected	Not Detected	0	NM_004655	NM_004655	NM_004655	Hs.156527	8313	AXIN2	axin 2	ENST00000618960	THC2461858	GO:0001934(positive regulation of protein phosphorylation)|GO:0001957(intramembranous ossification)|GO:0003139(secondary heart field specification)|GO:0003413(chondrocyte differentiation involved in endochondral bone morphogenesis)|GO:0005096(GTPase activator activity)|GO:0005515(protein binding)|GO:0005634(nucleus)|GO:0005654(nucleoplasm)|GO:0005737(cytoplasm)|GO:0005794(Golgi apparatus)|GO:0005…	"Homo sapiens axin 2 (AXIN2), mRNA [NM_004655]"	chr17:63525448-63525389	hs|17q24.1	TTTTGTCTTAAAGGTCTTGAGGGTTGACCATGTTGCGTCATCATCAACATTTTGGGGGTT
A_24_P99090	3.49596	-3.49596	-1.80569	down	1051.79	193.113	-0.994251	-2.79994	Detected	Detected	0	NM_018204	NM_018204	NM_018204	Hs.444028	26586	CKAP2	cytoskeleton associated protein 2	ENST00000378034	THC2482220	GO:0000281(cytokinesis after mitosis)|GO:0000922(spindle pole)|GO:0005737(cytoplasm)|GO:0005813(centrosome)|GO:0005881(cytoplasmic microtubule)|GO:0006915(apoptotic process)|GO:0007026(negative regulation of microtubule depolymerization)|GO:0015630(microtubule cytoskeleton)|GO:0045944(positive regulation of transcription from RNA polymerase II promoter)	"Homo sapiens cytoskeleton associated protein 2 (CKAP2), transcript variant 1, mRNA [NM_018204]"	chr13:53035863-53035922	hs|13q14.3	CCAGTTCTTCTCAAGGTATAATAAGAAATAAGACTCTATCAAGATCCATAGCATCTGAAG
A_33_P3320277	5.38438	-5.38438	-2.42878	down	153.559	18.3058	-3.77024	-6.19902	Detected	Not Detected	0	NM_014874	NM_014874	NM_014874	Hs.376681	9927	MFN2	mitofusin 2	ENST00000235329	NP1276892	GO:0001825(blastocyst formation)|GO:0003924(GTPase activity)|GO:0005515(protein binding)|GO:0005525(GTP binding)|GO:0005739(mitochondrion)|GO:0005741(mitochondrial outer membrane)|GO:0005829(cytosol)|GO:0006184(GTP catabolic process)|GO:0006626(protein targeting to mitochondrion)|GO:0006914(autophagy)|GO:0006915(apoptotic process)|GO:0006986(response to unfolded protein)|GO:0007006(mitochondrial …	"Homo sapiens mitofusin 2 (MFN2), transcript variant 1, mRNA [NM_014874]"	chr1:12067231-12067290	hs|1p36.22	TTGTGGAGCATGCCAGCGAGAAGCTGCAGCTTGTCATCAGCTACACTGGCTCCAACTGCA
A_33_P3413671	3.64638	-3.64638	-1.86647	down	6886.72	1212.27	1.71671	-0.149751	Detected	Detected	0	NM_007314	NM_007314	NM_007314	Hs.159472	27	ABL2	"ABL proto-oncogene 2, non-receptor tyrosine kinase"	ENST00000344730	THC2492412	"GO:0000287(magnesium ion binding)|GO:0001891(phagocytic cup)|GO:0003785(actin monomer binding)|GO:0004672(protein kinase activity)|GO:0004713(protein tyrosine kinase activity)|GO:0004715(non-membrane spanning protein tyrosine kinase activity)|GO:0005102(receptor binding)|GO:0005515(protein binding)|GO:0005524(ATP binding)|GO:0005829(cytosol)|GO:0006464(cellular protein modification process)|GO:0…	"Homo sapiens ABL proto-oncogene 2, non-receptor tyrosine kinase (ABL2), transcript variant b, mRNA [NM_007314]"	chr1:179073242-179073183	hs|1q25.2	AACACCTAGTCTAGGGATGCACAGCAGAATCCCCTAGGGTTAAAAAACAAAACAAAACAA
A_24_P293114	3.22306	-3.22306	-1.68843	down	87.201	17.366	-4.58661	-6.27505	Detected	Not Detected	0	NM_020971	NM_020971	NM_020971	Hs.32706	57731	SPTBN4	"spectrin, beta, non-erythrocytic 4"	ENST00000338932	THC2487198	GO:0002028(regulation of sodium ion transport)|GO:0003779(actin binding)|GO:0005200(structural constituent of cytoskeleton)|GO:0005515(protein binding)|GO:0005543(phospholipid binding)|GO:0005737(cytoplasm)|GO:0005829(cytosol)|GO:0005886(plasma membrane)|GO:0005912(adherens junction)|GO:0007016(cytoskeletal anchoring at plasma membrane)|GO:0007409(axonogenesis)|GO:0007411(axon guidance)|GO:000760…	"Homo sapiens spectrin, beta, non-erythrocytic 4 (SPTBN4), transcript variant sigma1, mRNA [NM_020971]"	chr19:41082026-41082085	hs|19q13.2	AGCCATGCGGTTAATTCCTGACTTAGTTTATTTTTGCAAAACGTCGATCTCCTCCTCCCC
A_33_P3227842	3.2678	-3.2678	-1.70832	down	114.723	22.5342	-4.19088	-5.8992	Detected	Not Detected	0	NM_001166006	NM_001166006	NM_001166006	Hs.175437	2035	EPB41	erythrocyte membrane protein band 4.1	ENST00000373797	THC2477921	GO:0003779(actin binding)|GO:0005200(structural constituent of cytoskeleton)|GO:0005515(protein binding)|GO:0005516(calmodulin binding)|GO:0005545(1-phosphatidylinositol binding)|GO:0005634(nucleus)|GO:0005794(Golgi apparatus)|GO:0005886(plasma membrane)|GO:0008015(blood circulation)|GO:0008091(spectrin)|GO:0014731(spectrin-associated cytoskeleton)|GO:0019898(extrinsic to membrane)|GO:0030036(act…	"Homo sapiens erythrocyte membrane protein band 4.1 (EPB41), transcript variant 3, mRNA [NM_001166006]"	chr1:29391669-29391728	hs|1p35.3	GAGTGAGTACTTTGTCCACATGACCAATTGTGAAAATGGAGGGAATAAATGTTTTTATGT
A_23_P95851	4.10343	-4.10343	-2.03683	down	90.284	14.1225	-4.53649	-6.57332	Detected	Not Detected	0	NM_024803	NM_024803	NM_024803	Hs.163079	79861	TUBAL3	"tubulin, alpha-like 3"	ENST00000380419	THC2478803	GO:0003924(GTPase activity)|GO:0005200(structural constituent of cytoskeleton)|GO:0005525(GTP binding)|GO:0005737(cytoplasm)|GO:0005874(microtubule)|GO:0006184(GTP catabolic process)|GO:0007017(microtubule-based process)|GO:0051258(protein polymerization)	"Homo sapiens tubulin, alpha-like 3 (TUBAL3), transcript variant 1, mRNA [NM_024803]"	chr10:5435268-5435209	hs|10p15.1	GGAGCCTTTGGAAGCTTAGAGTCCTTTGAACTGCTGAGTCACTTCTAGGTGGGATTTTTT
A_23_P121795	5.53622	-5.53622	-2.4689	down	2935.95	340.395	0.486723	-1.98218	Detected	Detected	0	NM_021069	NM_021069	NM_021069	Hs.655143	8470	SORBS2	sorbin and SH3 domain containing 2	ENST00000284776	THC2482472	GO:0005200(structural constituent of cytoskeleton)|GO:0005515(protein binding)|GO:0005634(nucleus)|GO:0005886(plasma membrane)|GO:0007015(actin filament organization)|GO:0007155(cell adhesion)|GO:0008093(cytoskeletal adaptor activity)|GO:0008150(biological_process)|GO:0008307(structural constituent of muscle)|GO:0015629(actin cytoskeleton)|GO:0016477(cell migration)|GO:0019904(protein domain spec…	"Homo sapiens sorbin and SH3 domain containing 2 (SORBS2), transcript variant 2, mRNA [NM_021069]"	chr4:186515040-186510881	hs|4q35.1	CGTTTCAGGCTCTGTATAACTATACTCCCAGGAATGAAGATGAGCTGGAGCTCAGAGAAA
A_33_P3275310	2.65791	-2.65791	-1.41029	down	139.113	33.5951	-3.91277	-5.32306	Detected	Not Detected	0	NM_004993	NM_004993	NM_004993	Hs.532632	4287	ATXN3	ataxin 3	ENST00000359366	THC2470488	"GO:0000226(microtubule cytoskeleton organization)|GO:0004843(ubiquitin-specific protease activity)|GO:0005515(protein binding)|GO:0005634(nucleus)|GO:0005654(nucleoplasm)|GO:0005737(cytoplasm)|GO:0005759(mitochondrial matrix)|GO:0005829(cytosol)|GO:0006289(nucleotide-excision repair)|GO:0006351(transcription, DNA-dependent)|GO:0006355(regulation of transcription, DNA-dependent)|GO:0006511(ubiqui…	"Homo sapiens ataxin 3 (ATXN3), transcript variant reference, mRNA [NM_004993]"	chr14:92529192-92529133	hs|14q32.12	GGCTGCACACATTTTATCAGGGAAAGTTTTTTGATCTAGGATTTATTGCTAACTAACTGA
A_33_P3260445	3.82846	-3.82846	-1.93677	down	436.399	73.1656	-2.26338	-4.20015	Detected	Not Detected	0	ENST00000367088		AK026669	Hs.445999	6993	DYNLT1	"dynein, light chain, Tctex-type 1"	ENST00000367088	THC2499901	GO:0000132(establishment of mitotic spindle orientation)|GO:0003774(motor activity)|GO:0005515(protein binding)|GO:0005794(Golgi apparatus)|GO:0005819(spindle)|GO:0005868(cytoplasmic dynein complex)|GO:0005874(microtubule)|GO:0007067(mitosis)|GO:0008152(metabolic process)|GO:0008277(regulation of G-protein coupled receptor protein signaling pathway)|GO:0019060(intracellular transport of viral pro…	"dynein, light chain, Tctex-type 1 [Source:HGNC Symbol;Acc:HGNC:11697] [ENST00000367088]"	chr6:159058312-159058253	hs|6q25.3	GTTTGCTAAAAGTGGACAGAATGACATTTGTGTTACCCAGTAGACTTCTCTAACAAAAAT
A_33_P3275310	2.65791	-2.65791	-1.41029	down	139.113	33.5951	-3.91277	-5.32306	Detected	Not Detected	0	NM_004993	NM_004993	NM_004993	Hs.532632	4287	ATXN3	ataxin 3	ENST00000359366	THC2470488	"GO:0000226(microtubule cytoskeleton organization)|GO:0004843(ubiquitin-specific protease activity)|GO:0005515(protein binding)|GO:0005634(nucleus)|GO:0005654(nucleoplasm)|GO:0005737(cytoplasm)|GO:0005759(mitochondrial matrix)|GO:0005829(cytosol)|GO:0006289(nucleotide-excision repair)|GO:0006351(transcription, DNA-dependent)|GO:0006355(regulation of transcription, DNA-dependent)|GO:0006511(ubiqui…	"Homo sapiens ataxin 3 (ATXN3), transcript variant reference, mRNA [NM_004993]"	chr14:92529192-92529133	hs|14q32.12	GGCTGCACACATTTTATCAGGGAAAGTTTTTTGATCTAGGATTTATTGCTAACTAACTGA
A_23_P89727	2.89088	-2.89088	-1.53151	down	243.626	54.093	-3.10436	-4.63587	Detected	Not Detected	0	NM_048368	NM_048368	NM_048368	Hs.465490	9150	CTDP1	"CTD (carboxy-terminal domain, RNA polymerase II, polypeptide A) phosphatase, subunit 1"	ENST00000075430	THC2735040	GO:0000922(spindle pole)|GO:0003899(DNA-directed RNA polymerase activity)|GO:0005654(nucleoplasm)|GO:0005737(cytoplasm)|GO:0005813(centrosome)|GO:0005819(spindle)|GO:0006366(transcription from RNA polymerase II promoter)|GO:0006368(transcription elongation from RNA polymerase II promoter)|GO:0006470(protein dephosphorylation)|GO:0008420(CTD phosphatase activity)|GO:0010458(exit from mitosis)|GO:0…	"Homo sapiens CTD (carboxy-terminal domain, RNA polymerase II, polypeptide A) phosphatase, subunit 1 (CTDP1), transcript variant 2, mRNA [NM_048368]"	chr18:77475245-77475304	hs|18q23	GATCCTGGTCCGTGTACACACTGACTACTATGCCAAGTATGACCGCTACCTCAACAAGGA
A_33_P3324884	3.16389	-3.16389	-1.6617	down	1288	261.302	-0.701969	-2.36367	Detected	Detected	0	NM_001286613	NM_001286613	NM_001286613	Hs.33476	64780	MICAL1	"microtubule associated monooxygenase, calponin and LIM domain containing 1"	ENST00000456101	THC2611990	"GO:0001933(negative regulation of protein phosphorylation)|GO:0003779(actin binding)|GO:0005515(protein binding)|GO:0005737(cytoplasm)|GO:0005882(intermediate filament)|GO:0007010(cytoskeleton organization)|GO:0007165(signal transduction)|GO:0008270(zinc ion binding)|GO:0016709(oxidoreductase activity, acting on paired donors, with incorporation or reduction of molecular oxygen, NADH or NADPH as…	"Homo sapiens microtubule associated monooxygenase, calponin and LIM domain containing 1 (MICAL1), transcript variant 3, mRNA [NM_001286613]"	chr6:109768397-109768338	hs|6q21	ACACCTCTATGTCCTGGAACGCCTCTGTGTCAACGGCCATTTCTTCCACCGGAGCTGCTT
A_23_P35349	3.61862	-3.61862	-1.85544	down	1473.23	261.32	-0.508123	-2.36356	Detected	Detected	0	NM_021738	NM_021738	NM_021738	Hs.499209	6840	SVIL	supervillin	ENST00000355867	THC2558268	GO:0002102(podosome)|GO:0005515(protein binding)|GO:0005634(nucleus)|GO:0005737(cytoplasm)|GO:0005886(plasma membrane)|GO:0005925(focal adhesion)|GO:0007010(cytoskeleton organization)|GO:0007519(skeletal muscle tissue development)|GO:0015629(actin cytoskeleton)|GO:0030496(midbody)|GO:0032154(cleavage furrow)|GO:0032467(positive regulation of cytokinesis)|GO:0043034(costamere)|GO:0051015(actin fil…	"Homo sapiens supervillin (SVIL), transcript variant 2, mRNA [NM_021738]"	chr10:29747064-29747005	hs|10p11.23	GTTTTCAGAACCTGACATTGTTAAAGATACTGCTTGTCCCGGAGTTGTGTATTTTGTAAA
A_24_P861009	2.32561	2.32561	1.21761	up	1339.02	1998.82	-0.645921	0.57169	Detected	Detected	0	NM_001007246	NM_001007246	NM_001007246	Hs.654740	54014	BRWD1	bromodomain and WD repeat domain containing 1	ENST00000341322	THC2461502	"GO:0003674(molecular_function)|GO:0005634(nucleus)|GO:0005730(nucleolus)|GO:0005737(cytoplasm)|GO:0006351(transcription, DNA-dependent)|GO:0006357(regulation of transcription from RNA polymerase II promoter)|GO:0007010(cytoskeleton organization)|GO:0008360(regulation of cell shape)"	"Homo sapiens bromodomain and WD repeat domain containing 1 (BRWD1), transcript variant 3, mRNA [NM_001007246]"	chr21:40668993-40668934	hs|21q22.2	AGTCACAGATCCTACGTATGTGCTCTTCAGTAGAGGATTTTCTGTGATCCTACAATGAAG
A_23_P137073	3.93647	-3.93647	-1.9769	down	693.107	113.016	-1.59595	-3.57285	Detected	Detected	0	NM_005096	NM_005096	NM_005096	Hs.522684	9203	ZMYM3	"zinc finger, MYM-type 3"	ENST00000373988	THC2467442	GO:0003677(DNA binding)|GO:0005634(nucleus)|GO:0007010(cytoskeleton organization)|GO:0007275(multicellular organismal development)|GO:0008270(zinc ion binding)|GO:0022604(regulation of cell morphogenesis)	"Homo sapiens zinc finger, MYM-type 3 (ZMYM3), transcript variant 2, mRNA [NM_005096]"	chrX:70459485-70459456	hs|Xq13.1	GGGTTTCCTGACCCATCCCGCATAGGTAGACCTCTTGTTCCTAGGCATGACCTAGGGAAA
A_23_P201845	5.64645	-5.64645	-2.49734	down	2604.32	296.051	0.313805	-2.18354	Detected	Detected	0	NM_007167	NM_007167	NM_007167	Hs.729053	9204	ZMYM6	"zinc finger, MYM-type 6"	ENST00000466345	THC2735964	GO:0003677(DNA binding)|GO:0005634(nucleus)|GO:0007010(cytoskeleton organization)|GO:0007275(multicellular organismal development)|GO:0008270(zinc ion binding)|GO:0022604(regulation of cell morphogenesis)	"Homo sapiens zinc finger, MYM-type 6 (ZMYM6), mRNA [NM_007167]"	chr1:35470800-35470741	hs|1p34.3	CAGTGTGATGTCATTGGCAAAAATACCTGCTACCTTATCTACAGGGAACACTAACAGTGT
A_33_P3423984	5.75732	-5.75732	-2.5254	down	123.231	13.7387	-4.08766	-6.61306	Detected	Not Detected	0	ENST00000508898		AK096458	Hs.151220	23022	PALLD	"palladin, cytoskeletal associated protein"	ENST00000508898	THC2490551	GO:0001726(ruffle)|GO:0003779(actin binding)|GO:0005515(protein binding)|GO:0005634(nucleus)|GO:0005737(cytoplasm)|GO:0005739(mitochondrion)|GO:0005884(actin filament)|GO:0005886(plasma membrane)|GO:0005925(focal adhesion)|GO:0007010(cytoskeleton organization)|GO:0015629(actin cytoskeleton)|GO:0030018(Z disc)|GO:0030027(lamellipodium)|GO:0051371(muscle alpha-actinin binding)	"palladin, cytoskeletal associated protein [Source:HGNC Symbol;Acc:HGNC:17068] [ENST00000508898]"	chr4:169621207-169621266	hs|4q32.3	GATGAAAATTCAGTATTACAACCTGGCTCATCTCATTTCCTCATGGCTTTCTTCATTTTT
A_23_P119377	3.06196	-3.06196	-1.61446	down	15686.7	3288.36	2.90437	1.28991	Detected	Detected	0	NM_004228	NM_004228	NM_004228	Hs.144011	9266	CYTH2	cytohesin 2	ENST00000474049	THC2560235	"GO:0005086(ARF guanyl-nucleotide exchange factor activity)|GO:0005515(protein binding)|GO:0005737(cytoplasm)|GO:0005802(trans-Golgi network)|GO:0005886(plasma membrane)|GO:0006897(endocytosis)|GO:0008289(lipid binding)|GO:0016020(membrane)|GO:0016192(vesicle-mediated transport)|GO:0030036(actin cytoskeleton organization)|GO:0030155(regulation of cell adhesion)|GO:0032012(regulation of ARF protei…	"Homo sapiens cytohesin 2 (CYTH2), transcript variant 2, mRNA [NM_004228]"	chr19:48975593-48975652	hs|19q13.33	CTTGGTGGAGAATGAACTGCTGCAGAACACACCCGAGGAGATCGCCCGCTTCCTGTACAA
A_24_P123408	3.09619	-3.09619	-1.6305	down	3664.76	759.739	0.806614	-0.823881	Detected	Detected	0	NM_014945	NM_014945	NM_014945	Hs.49688	22885	ABLIM3	"actin binding LIM protein family, member 3"	ENST00000517451	NP706950	"GO:0001725(stress fiber)|GO:0003779(actin binding)|GO:0005737(cytoplasm)|GO:0006351(transcription, DNA-dependent)|GO:0007411(axon guidance)|GO:0008270(zinc ion binding)|GO:0030027(lamellipodium)|GO:0030032(lamellipodium assembly)|GO:0030036(actin cytoskeleton organization)|GO:0042384(cilium assembly)|GO:0045944(positive regulation of transcription from RNA polymerase II promoter)"	"Homo sapiens actin binding LIM protein family, member 3 (ABLIM3), transcript variant 2, mRNA [NM_014945]"	chr5:148626089-148627383	hs|5q32	TTTGACCGCAGCATGCACAAGCTCCAAAGTGGAATTGGCCGGCTGATTCTGAAGGAAGAA
A_24_P830690	3.11128	-3.11128	-1.63751	down	1853.2	382.324	-0.177081	-1.81459	Detected	Detected	0	NM_002613	NM_002613	NM_002613	Hs.459691	5170	PDPK1	3-phosphoinositide dependent protein kinase 1	ENST00000562415	NP1472903	"GO:0003323(type B pancreatic cell development)|GO:0004674(protein serine/threonine kinase activity)|GO:0004676(3-phosphoinositide-dependent protein kinase activity)|GO:0005158(insulin receptor binding)|GO:0005515(protein binding)|GO:0005524(ATP binding)|GO:0005654(nucleoplasm)|GO:0005737(cytoplasm)|GO:0005829(cytosol)|GO:0005886(plasma membrane)|GO:0005925(focal adhesion)|GO:0006351(transcriptio…	"Homo sapiens 3-phosphoinositide dependent protein kinase 1 (PDPK1), transcript variant 1, mRNA [NM_002613]"	chr16:2631645-2631704	hs|16p13.3	GAATATGACTTTCCAGAAAAATTCTTCCCTAAGGCAAGAGACCTCGTGGAGAAACTTTTG
A_33_P3227842	3.2678	-3.2678	-1.70832	down	114.723	22.5342	-4.19088	-5.8992	Detected	Not Detected	0	NM_001166006	NM_001166006	NM_001166006	Hs.175437	2035	EPB41	erythrocyte membrane protein band 4.1	ENST00000373797	THC2477921	GO:0003779(actin binding)|GO:0005200(structural constituent of cytoskeleton)|GO:0005515(protein binding)|GO:0005516(calmodulin binding)|GO:0005545(1-phosphatidylinositol binding)|GO:0005634(nucleus)|GO:0005794(Golgi apparatus)|GO:0005886(plasma membrane)|GO:0008015(blood circulation)|GO:0008091(spectrin)|GO:0014731(spectrin-associated cytoskeleton)|GO:0019898(extrinsic to membrane)|GO:0030036(act…	"Homo sapiens erythrocyte membrane protein band 4.1 (EPB41), transcript variant 3, mRNA [NM_001166006]"	chr1:29391669-29391728	hs|1p35.3	GAGTGAGTACTTTGTCCACATGACCAATTGTGAAAATGGAGGGAATAAATGTTTTTATGT
A_33_P3275310	2.65791	-2.65791	-1.41029	down	139.113	33.5951	-3.91277	-5.32306	Detected	Not Detected	0	NM_004993	NM_004993	NM_004993	Hs.532632	4287	ATXN3	ataxin 3	ENST00000359366	THC2470488	"GO:0000226(microtubule cytoskeleton organization)|GO:0004843(ubiquitin-specific protease activity)|GO:0005515(protein binding)|GO:0005634(nucleus)|GO:0005654(nucleoplasm)|GO:0005737(cytoplasm)|GO:0005759(mitochondrial matrix)|GO:0005829(cytosol)|GO:0006289(nucleotide-excision repair)|GO:0006351(transcription, DNA-dependent)|GO:0006355(regulation of transcription, DNA-dependent)|GO:0006511(ubiqui…	"Homo sapiens ataxin 3 (ATXN3), transcript variant reference, mRNA [NM_004993]"	chr14:92529192-92529133	hs|14q32.12	GGCTGCACACATTTTATCAGGGAAAGTTTTTTGATCTAGGATTTATTGCTAACTAACTGA
A_23_P333138	6.11078	-6.11078	-2.61136	down	141.142	14.8254	-3.89189	-6.50324	Detected	Not Detected	0	NM_015026	NM_015026	NM_015026	Hs.389378	23041	MON2	MON2 homolog (S. cerevisiae)	ENST00000393630	THC2653603	GO:0005086(ARF guanyl-nucleotide exchange factor activity)|GO:0005515(protein binding)|GO:0005802(trans-Golgi network)|GO:0006895(Golgi to endosome transport)|GO:0015031(protein transport)|GO:0016192(vesicle-mediated transport)|GO:0030036(actin cytoskeleton organization)|GO:0043547(positive regulation of GTPase activity)|GO:0070062(extracellular vesicular exosome)	"Homo sapiens MON2 homolog (S. cerevisiae) (MON2), transcript variant 1, mRNA [NM_015026]"	chr12:62990309-62990368	hs|12q14.1	TTTGGCAGATAAGCTAATCTTGTATAAAGCATCACATTTTACTATGCTTAGTGTTCCTGG
A_21_P0000052	3.02947	-3.02947	-1.59906	down	823.957	174.576	-1.34646	-2.94553	Detected	Detected	0	NM_001164554	NM_001164554	NM_001164554	Hs.13318	27185	DISC1	disrupted in schizophrenia 1	ENST00000468399	THC2602483	GO:0000226(microtubule cytoskeleton organization)|GO:0001764(neuron migration)|GO:0002052(positive regulation of neuroblast proliferation)|GO:0005515(protein binding)|GO:0005739(mitochondrion)|GO:0005813(centrosome)|GO:0005874(microtubule)|GO:0010975(regulation of neuron projection development)|GO:0014069(postsynaptic density)|GO:0021799(cerebral cortex radially oriented cell migration)|GO:002184…	"Homo sapiens disrupted in schizophrenia 1 (DISC1), transcript variant q, mRNA [NM_001164554]"	chr1:231838245-231838304	hs|1q42.2	GTGAATTTGAGAAATGTCAGACTGTGCCAAAGGGGGTCACATGCATCAAATTTCCACATA
A_21_P0000117	4.99093	-4.99093	-2.31931	down	172.272	22.1555	-3.60434	-5.92365	Detected	Not Detected	0	NM_001193281	NM_001193281	NM_001193281	Hs.27695	4281	MID1	midline 1		THC2626906	GO:0000226(microtubule cytoskeleton organization)|GO:0005819(spindle)|GO:0005829(cytosol)|GO:0005874(microtubule)|GO:0005875(microtubule associated complex)|GO:0005881(cytoplasmic microtubule)|GO:0007026(negative regulation of microtubule depolymerization)|GO:0007389(pattern specification process)|GO:0008017(microtubule binding)|GO:0008152(metabolic process)|GO:0008270(zinc ion binding)|GO:001687…	"Homo sapiens midline 1 (MID1), transcript variant 9, mRNA [NM_001193281]"	chrX:10473439-10473380	hs|Xp22.2	CCTTCCATTCTGCTTCTTCATTTTGGAACTGCTTCTAACAAAGTTACCATTAAACACAAA
A_33_P3219942	8.92104	-8.92104	-3.15721	down	411.324	29.5948	-2.34876	-5.50597	Detected	Not Detected	0	NM_001008707	NM_001008707	NM_001008707	Hs.12451	2009	EML1	echinoderm microtubule associated protein like 1	ENST00000557313	THC2477692	GO:0000226(microtubule cytoskeleton organization)|GO:0002244(hemopoietic progenitor cell differentiation)|GO:0005509(calcium ion binding)|GO:0005515(protein binding)|GO:0005829(cytosol)|GO:0005874(microtubule)|GO:0005875(microtubule associated complex)|GO:0007052(mitotic spindle organization)|GO:0007405(neuroblast proliferation)|GO:0007420(brain development)|GO:0008017(microtubule binding)|GO:001…	"Homo sapiens echinoderm microtubule associated protein like 1 (EML1), transcript variant 1, mRNA [NM_001008707]"	chr14:100404189-100404248	hs|14q32.2	GAAACTACAAGAGACATTGAATGGGCTACCTATACCTGCACTTTGGGATTCCATGTTTTT
A_33_P3234849	2.51722	2.51722	1.33183	up	222.049	358.771	-3.23816	-1.90632	Detected	Detected	0	NM_007124	NM_007124	NM_007124	Hs.133135	7402	UTRN	utrophin	ENST00000465299	THC2536486	GO:0001954(positive regulation of cell-matrix adhesion)|GO:0003779(actin binding)|GO:0005178(integrin binding)|GO:0005515(protein binding)|GO:0005654(nucleoplasm)|GO:0005737(cytoplasm)|GO:0005856(cytoskeleton)|GO:0005886(plasma membrane)|GO:0006936(muscle contraction)|GO:0007517(muscle organ development)|GO:0008270(zinc ion binding)|GO:0016010(dystrophin-associated glycoprotein complex)|GO:001602…	"Homo sapiens utrophin (UTRN), mRNA [NM_007124]"	chr6:145157529-145157588	hs|6q24.2	ATCACACGTCTGAGGATTCAGAACTTATAGCAGAAGCAAAACTCCTCAGGCAGCACAAAG
A_33_P3287584	2.89585	-2.89585	-1.53399	down	3992.84	885.02	0.930311	-0.603675	Detected	Detected	0	NM_133471	NM_133471	NM_133471	Hs.101150	170954	PPP1R18	"protein phosphatase 1, regulatory subunit 18"	ENST00000615527	NP851514	GO:0003779(actin binding)|GO:0005737(cytoplasm)|GO:0005856(cytoskeleton)|GO:0019902(phosphatase binding)	"Homo sapiens protein phosphatase 1, regulatory subunit 18 (PPP1R18), transcript variant 1, mRNA [NM_133471]"	chr6:30652961-30652902	hs|6p21.33	AAAGAAGAGTGGCCAGTTCCAGGGGTAGCTCCAAAAGAGACTGCAGAGCTGTCCGAGACC
A_24_P123408	3.09619	-3.09619	-1.6305	down	3664.76	759.739	0.806614	-0.823881	Detected	Detected	0	NM_014945	NM_014945	NM_014945	Hs.49688	22885	ABLIM3	"actin binding LIM protein family, member 3"	ENST00000517451	NP706950	"GO:0001725(stress fiber)|GO:0003779(actin binding)|GO:0005737(cytoplasm)|GO:0006351(transcription, DNA-dependent)|GO:0007411(axon guidance)|GO:0008270(zinc ion binding)|GO:0030027(lamellipodium)|GO:0030032(lamellipodium assembly)|GO:0030036(actin cytoskeleton organization)|GO:0042384(cilium assembly)|GO:0045944(positive regulation of transcription from RNA polymerase II promoter)"	"Homo sapiens actin binding LIM protein family, member 3 (ABLIM3), transcript variant 2, mRNA [NM_014945]"	chr5:148626089-148627383	hs|5q32	TTTGACCGCAGCATGCACAAGCTCCAAAGTGGAATTGGCCGGCTGATTCTGAAGGAAGAA
A_24_P69095	3.13595	-3.13595	-1.6489	down	1093.05	223.727	-0.93874	-2.58764	Detected	Detected	0	NM_003633	NM_003633	NM_003633	Hs.744844	8507	ENC1	ectodermal-neural cortex 1 (with BTB domain)	ENST00000618628	THC2495238	GO:0000790(nuclear chromatin)|GO:0003779(actin binding)|GO:0005515(protein binding)|GO:0005634(nucleus)|GO:0005654(nucleoplasm)|GO:0005730(nucleolus)|GO:0005737(cytoplasm)|GO:0005856(cytoskeleton)|GO:0007275(multicellular organismal development)|GO:0007399(nervous system development)|GO:0010499(proteasomal ubiquitin-independent protein catabolic process)|GO:0010976(positive regulation of neuron p…	"Homo sapiens ectodermal-neural cortex 1 (with BTB domain) (ENC1), transcript variant 1, mRNA [NM_003633]"	chr5:73924314-73924255	hs|5q13.3	TTGTTTACTAAGCATGTGCCGTCGTAGGTATTAGTGCTAGTCTCAAATAGGTGCTTCCCC
A_33_P3324884	3.16389	-3.16389	-1.6617	down	1288	261.302	-0.701969	-2.36367	Detected	Detected	0	NM_001286613	NM_001286613	NM_001286613	Hs.33476	64780	MICAL1	"microtubule associated monooxygenase, calponin and LIM domain containing 1"	ENST00000456101	THC2611990	"GO:0001933(negative regulation of protein phosphorylation)|GO:0003779(actin binding)|GO:0005515(protein binding)|GO:0005737(cytoplasm)|GO:0005882(intermediate filament)|GO:0007010(cytoskeleton organization)|GO:0007165(signal transduction)|GO:0008270(zinc ion binding)|GO:0016709(oxidoreductase activity, acting on paired donors, with incorporation or reduction of molecular oxygen, NADH or NADPH as…	"Homo sapiens microtubule associated monooxygenase, calponin and LIM domain containing 1 (MICAL1), transcript variant 3, mRNA [NM_001286613]"	chr6:109768397-109768338	hs|6q21	ACACCTCTATGTCCTGGAACGCCTCTGTGTCAACGGCCATTTCTTCCACCGGAGCTGCTT
A_24_P293114	3.22306	-3.22306	-1.68843	down	87.201	17.366	-4.58661	-6.27505	Detected	Not Detected	0	NM_020971	NM_020971	NM_020971	Hs.32706	57731	SPTBN4	"spectrin, beta, non-erythrocytic 4"	ENST00000338932	THC2487198	GO:0002028(regulation of sodium ion transport)|GO:0003779(actin binding)|GO:0005200(structural constituent of cytoskeleton)|GO:0005515(protein binding)|GO:0005543(phospholipid binding)|GO:0005737(cytoplasm)|GO:0005829(cytosol)|GO:0005886(plasma membrane)|GO:0005912(adherens junction)|GO:0007016(cytoskeletal anchoring at plasma membrane)|GO:0007409(axonogenesis)|GO:0007411(axon guidance)|GO:000760…	"Homo sapiens spectrin, beta, non-erythrocytic 4 (SPTBN4), transcript variant sigma1, mRNA [NM_020971]"	chr19:41082026-41082085	hs|19q13.2	AGCCATGCGGTTAATTCCTGACTTAGTTTATTTTTGCAAAACGTCGATCTCCTCCTCCCC
A_33_P3227842	3.2678	-3.2678	-1.70832	down	114.723	22.5342	-4.19088	-5.8992	Detected	Not Detected	0	NM_001166006	NM_001166006	NM_001166006	Hs.175437	2035	EPB41	erythrocyte membrane protein band 4.1	ENST00000373797	THC2477921	GO:0003779(actin binding)|GO:0005200(structural constituent of cytoskeleton)|GO:0005515(protein binding)|GO:0005516(calmodulin binding)|GO:0005545(1-phosphatidylinositol binding)|GO:0005634(nucleus)|GO:0005794(Golgi apparatus)|GO:0005886(plasma membrane)|GO:0008015(blood circulation)|GO:0008091(spectrin)|GO:0014731(spectrin-associated cytoskeleton)|GO:0019898(extrinsic to membrane)|GO:0030036(act…	"Homo sapiens erythrocyte membrane protein band 4.1 (EPB41), transcript variant 3, mRNA [NM_001166006]"	chr1:29391669-29391728	hs|1p35.3	GAGTGAGTACTTTGTCCACATGACCAATTGTGAAAATGGAGGGAATAAATGTTTTTATGT
A_32_P87568	3.37353	-3.37353	-1.75426	down	1568.26	298.387	-0.417941	-2.1722	Detected	Detected	0	NM_001008493	NM_001008493	NM_001008493	Hs.497893	55740	ENAH	enabled homolog (Drosophila)	ENST00000366844	THC2526906	GO:0001725(stress fiber)|GO:0001843(neural tube closure)|GO:0003779(actin binding)|GO:0005515(protein binding)|GO:0005737(cytoplasm)|GO:0005829(cytosol)|GO:0005886(plasma membrane)|GO:0005925(focal adhesion)|GO:0007411(axon guidance)|GO:0008154(actin polymerization or depolymerization)|GO:0017124(SH3 domain binding)|GO:0030027(lamellipodium)|GO:0030054(cell junction)|GO:0030175(filopodium)|GO:004…	"Homo sapiens enabled homolog (Drosophila) (ENAH), transcript variant 1, mRNA [NM_001008493]"	chr1:225675153-225675094	hs|1q42.12	CTTGCTTGACTCAAGTTGTTTGAAAATCTGAATTAAACAGGATCTCATTGTCAGGAAACA
A_23_P215883	3.89638	-3.89638	-1.96213	down	148.492	24.4618	-3.81865	-5.78078	Detected	Not Detected	0	NM_001040630	NM_001040630	NM_001040630	Hs.492427	83988	NCALD	neurocalcin delta	ENST00000395923	THC2592538	GO:0003073(regulation of systemic arterial blood pressure)|GO:0003779(actin binding)|GO:0005509(calcium ion binding)|GO:0005622(intracellular)|GO:0005829(cytosol)|GO:0007268(synaptic transmission)|GO:0015631(tubulin binding)|GO:0016192(vesicle-mediated transport)|GO:0019722(calcium-mediated signaling)|GO:0030130(clathrin coat of trans-Golgi network vesicle)|GO:0030276(clathrin binding)|GO:0043014…	"Homo sapiens neurocalcin delta (NCALD), transcript variant 7, mRNA [NM_001040630]"	chr8:102699720-102699661	hs|8q22.3	GAAATTTTGAGACCTAGACTCTGTAAAAATAATCCTAGTCTTCCTCCAGGGGTCAGTTCC
A_33_P3423121	3.96974	-3.96974	-1.98904	down	595.384	96.268	-1.81521	-3.80426	Detected	Detected	0	NM_001260492	NM_001260492	NM_001260492	Hs.263671	5962	RDX	radixin		THC2635715	GO:0001726(ruffle)|GO:0003779(actin binding)|GO:0005515(protein binding)|GO:0005615(extracellular space)|GO:0005737(cytoplasm)|GO:0005856(cytoskeleton)|GO:0005886(plasma membrane)|GO:0005925(focal adhesion)|GO:0010628(positive regulation of gene expression)|GO:0019898(extrinsic to membrane)|GO:0030027(lamellipodium)|GO:0030033(microvillus assembly)|GO:0030175(filopodium)|GO:0030315(T-tubule)|GO:0…	"Homo sapiens radixin (RDX), transcript variant 1, mRNA [NM_001260492]"	chr11:110066370-110066311	hs|11q22.3	GCAGAAATCGATGCAACATTTCTTTCCTGTCTGGGCTGTTTGTATAATTGTATATAAATG
A_23_P88470	4.28762	-4.28762	-2.10018	down	579.728	86.7871	-1.85366	-3.95383	Detected	Detected	0	NM_017672	NM_017672	NM_017672	Hs.512894	54822	TRPM7	"transient receptor potential cation channel, subfamily M, member 7"	ENST00000313478	THC2461668	GO:0001726(ruffle)|GO:0003779(actin binding)|GO:0004674(protein serine/threonine kinase activity)|GO:0005262(calcium channel activity)|GO:0005524(ATP binding)|GO:0005886(plasma membrane)|GO:0010961(cellular magnesium ion homeostasis)|GO:0016021(integral to membrane)|GO:0016340(calcium-dependent cell-matrix adhesion)|GO:0017022(myosin binding)|GO:0031032(actomyosin structure organization)|GO:00342…	"Homo sapiens transient receptor potential cation channel, subfamily M, member 7 (TRPM7), transcript variant 1, mRNA [NM_017672]"	chr15:50853618-50853559	hs|15q21.2	TGTATAGCAGAGGATCTCATTTGACTTTGTTTTGATGAGGGTGATGCTCTCTCTTATGTG
A_24_P11900	5.01718	-5.01718	-2.32688	down	154.367	19.7488	-3.76267	-6.08955	Detected	Not Detected	0	NM_014981	NM_014981	NM_014981	Hs.731060	22989	MYH15	"myosin, heavy chain 15"	ENST00000273353	THC2601154	GO:0003774(motor activity)|GO:0003779(actin binding)|GO:0005516(calmodulin binding)|GO:0005524(ATP binding)|GO:0008152(metabolic process)|GO:0030016(myofibril)|GO:0032982(myosin filament)	"Homo sapiens myosin, heavy chain 15 (MYH15), mRNA [NM_014981]"	chr3:108099821-108099762	hs|3q13.13	ATATGCTGGTACATGCTTTAAACATGGAGGTAACCCCACACGAGACATTCAGTGACAGGT
A_33_P3423984	5.75732	-5.75732	-2.5254	down	123.231	13.7387	-4.08766	-6.61306	Detected	Not Detected	0	ENST00000508898		AK096458	Hs.151220	23022	PALLD	"palladin, cytoskeletal associated protein"	ENST00000508898	THC2490551	GO:0001726(ruffle)|GO:0003779(actin binding)|GO:0005515(protein binding)|GO:0005634(nucleus)|GO:0005737(cytoplasm)|GO:0005739(mitochondrion)|GO:0005884(actin filament)|GO:0005886(plasma membrane)|GO:0005925(focal adhesion)|GO:0007010(cytoskeleton organization)|GO:0015629(actin cytoskeleton)|GO:0030018(Z disc)|GO:0030027(lamellipodium)|GO:0051371(muscle alpha-actinin binding)	"palladin, cytoskeletal associated protein [Source:HGNC Symbol;Acc:HGNC:17068] [ENST00000508898]"	chr4:169621207-169621266	hs|4q32.3	GATGAAAATTCAGTATTACAACCTGGCTCATCTCATTTCCTCATGGCTTTCTTCATTTTT
A_33_P3368034	6.60271	6.60271	2.72306	up	555.864	2355.8	-1.9143	0.808758	Detected	Detected	0												chr12:090104098-090104039	hs|12q21.33	TAGTAGAAGAAACAAACCCAAAATGAAAACACCCGGATTTTAAGCGCGGATCCTGCGAGG
A_24_P309095	4.94122	-4.94122	-2.30487	down	263.291	34.2017	-2.99238	-5.29724	Detected	Not Detected	0	NM_005045	NM_005045	NM_005045	Hs.655654	5649	RELN	reelin	ENST00000424685	THC2703065	"GO:0000904(cell morphogenesis involved in differentiation)|GO:0001764(neuron migration)|GO:0004712(protein serine/threonine/tyrosine kinase activity)|GO:0005578(proteinaceous extracellular matrix)|GO:0005615(extracellular space)|GO:0005737(cytoplasm)|GO:0006508(proteolysis)|GO:0007155(cell adhesion)|GO:0007411(axon guidance)|GO:0007417(central nervous system development)|GO:0007420(brain develop…	"Homo sapiens reelin (RELN), transcript variant 1, mRNA [NM_005045]"	chr7:103113096-103113037	hs|7q22.1	AACTAATGACAAGTGACTTATTTGCTCATAAGTAAATGTCTTCATGTTGATGTGTCCGTG
A_23_P302060	5.17781	-5.17781	-2.37234	down	168.668	20.909	-3.63485	-6.00719	Detected	Not Detected	0	NM_176891	NM_176891	NM_176891	Hs.682604	338376	IFNE	"interferon, epsilon"	ENST00000448696	THC2488001	GO:0002250(adaptive immune response)|GO:0002286(T cell activation involved in immune response)|GO:0002323(natural killer cell activation involved in immune response)|GO:0005125(cytokine activity)|GO:0005132(interferon-alpha/beta receptor binding)|GO:0005615(extracellular space)|GO:0006959(humoral immune response)|GO:0019221(cytokine-mediated signaling pathway)|GO:0030183(B cell differentiation)|G…	"Homo sapiens interferon, epsilon (IFNE), mRNA [NM_176891]"	chr9:21481161-21481102	hs|9p21.3	TTGTGTTCAGTCTCACAGAAAAACTGAGCAAACAAGGAAGACCCTTGAACGACATGAAGC
A_32_P22338	4.44812	-4.44812	-2.1532	down	6779.63	978.31	1.6941	-0.459094	Detected	Detected	0	NM_013374	NM_013374	NM_013374	Hs.475896	10015	PDCD6IP	programmed cell death 6 interacting protein	ENST00000622242	THC2778146	GO:0000920(cytokinetic cell separation)|GO:0001772(immunological synapse)|GO:0005515(protein binding)|GO:0005737(cytoplasm)|GO:0005815(microtubule organizing center)|GO:0005829(cytosol)|GO:0005925(focal adhesion)|GO:0006915(apoptotic process)|GO:0006997(nucleus organization)|GO:0007080(mitotic metaphase plate congression)|GO:0010824(regulation of centrosome duplication)|GO:0015031(protein transpo…	"Homo sapiens programmed cell death 6 interacting protein (PDCD6IP), transcript variant 1, mRNA [NM_013374]"	chr3:33894107-33894166	hs|3p22.3	AAGATGGTGTGATAAATGAAGAAGCTCTTTCTGTTACTGAACTAGATCGAGTCTATGGAG
A_21_P0012630	4.57301	-4.57301	-2.19314	down	111.805	15.693	-4.22805	-6.42119	Detected	Not Detected	0	NM_001297550	NM_001297550		Hs.105196	100506013	APELA	apelin receptor early endogenous ligand	ENST00000507152	THC2615510	GO:0005179(hormone activity)|GO:0005576(extracellular region)|GO:0005615(extracellular space)|GO:0007492(endoderm development)|GO:0007507(heart development)|GO:0031704(apelin receptor binding)|GO:0060183(apelin receptor signaling pathway)|GO:0090133(mesendoderm migration)|GO:0090134(cell migration involved in mesendoderm migration)	"Homo sapiens apelin receptor early endogenous ligand (APELA), mRNA [NM_001297550]"	chr4:165816630-165816689	hs|4q32.3	AGCCACACAAAAGAACTTCATGATGCCAACAGCGTGATTGCTTAGAAGTTCCTACACAAA

## Sheet: Regulation  of cell adhesion
ProbeName	FC (abs) [MSC/P/C-h 2:1] vs [MSC]	FC [MSC/P/C-h 2:1] vs [MSC]	Log FC [MSC/P/C-h 2:1] vs [MSC]	Regulation [MSC/P/C-h 2:1] vs [MSC]	MSC:gProcessedSignal(raw)	MSC/P/C-h 2:1:gProcessedSignal(raw)	MSC:gProcessedSignal(normalized)	MSC/P/C-h 2:1:gProcessedSignal(normalized)	MSC:gFEFlags	MSC/P/C-h 2:1:gFEFlags	ControlType	PrimaryAccession	RefSeqAccession	GenbankAccession	UniGeneID	EntrezGeneID	GeneSymbol	GeneName	EnsemblID	TIGRID	GO	Description	GenomicCoordinates	Cytoband	Sequence_x000D_
A_33_P3391603	4.19916	4.19916	2.0701	up	706.607	1904.53	-1.56812	0.501979	Detected	Detected	0	NM_001105209	NM_001105209	NM_001105209	Hs.654572	3910	LAMA4	"laminin, alpha 4"	ENST00000453937	THC2474803	GO:0005102(receptor binding)|GO:0005201(extracellular matrix structural constituent)|GO:0005515(protein binding)|GO:0005576(extracellular region)|GO:0005604(basement membrane)|GO:0005605(basal lamina)|GO:0005606(laminin-1 complex)|GO:0007155(cell adhesion)|GO:0030155(regulation of cell adhesion)|GO:0030198(extracellular matrix organization)|GO:0030334(regulation of cell migration)|GO:0031012(extr…	"Homo sapiens laminin, alpha 4 (LAMA4), transcript variant 5, mRNA [NM_001105209]"	chr6:112575046-112574987	hs|6q21	AGTTTCACCTGGGCTAGGTCAGTTCGGAAACTTGAAATAAAGAGTTTTCCTTTGTAAGTT	cell adhesion
A_23_P19369	2.83588	2.83588	1.50379	up	210.006	382.267	-3.3186	-1.81481	Detected	Detected	0	NM_017640	NM_017640	NM_017640	Hs.649550	55604	LRRC16A	leucine rich repeat containing 16A	ENST00000476458	THC2471239	GO:0005634(nucleus)|GO:0005737(cytoplasm)|GO:0005829(cytosol)|GO:0007015(actin filament organization)|GO:0007596(blood coagulation)|GO:0016477(cell migration)|GO:0030027(lamellipodium)|GO:0030032(lamellipodium assembly)|GO:0030335(positive regulation of cell migration)|GO:0030838(positive regulation of actin filament polymerization)|GO:0031529(ruffle organization)|GO:0031941(filamentous actin)|GO…	"Homo sapiens leucine rich repeat containing 16A (LRRC16A), transcript variant 1, mRNA [NM_017640]"	chr6:25620055-25620114	hs|6p22.2	CATTTGATTTCTAAACATTCCTTCATATGCCTTTAATGAAAGCCAGCAATTATCCCATGG	positive regulation of substrate adhesion-dependent cell spreading
A_23_P102611	3.21861	3.21861	1.68644	up	1160.2	2396.89	-0.852732	0.833704	Detected	Detected	0	NM_003881	NM_003881	NM_003881	Hs.592145	8839	WISP2	WNT1 inducible signaling pathway protein 2	ENST00000372868	THC2486325	GO:0001558(regulation of cell growth)|GO:0005178(integrin binding)|GO:0005520(insulin-like growth factor binding)|GO:0005578(proteinaceous extracellular matrix)|GO:0005615(extracellular space)|GO:0005886(plasma membrane)|GO:0007155(cell adhesion)|GO:0007165(signal transduction)|GO:0007267(cell-cell signaling)|GO:0008201(heparin binding)|GO:0060548(negative regulation of cell death)|GO:0070062(ext…	"Homo sapiens WNT1 inducible signaling pathway protein 2 (WISP2), mRNA [NM_003881]"	chr20:43356347-43356406	hs|20q13.12	CATTTTTCTGGGGGTAGGATGAAGAGAAGGCACACAGAGATTCTGGATCTCCTGCTGCCT	cell adhesion
A_23_P97112	7.45728	7.45728	2.89865	up	23.6717	113.307	-6.4678	-3.56915	Not Detected	Detected	0	NM_000450	NM_000450	NM_000450	Hs.82848	6401	SELE	selectin E	ENST00000333360	THC2470435	GO:0002092(positive regulation of receptor internalization)|GO:0002523(leukocyte migration involved in inflammatory response)|GO:0002687(positive regulation of leukocyte migration)|GO:0004888(transmembrane signaling receptor activity)|GO:0005515(protein binding)|GO:0005615(extracellular space)|GO:0005886(plasma membrane)|GO:0005901(caveola)|GO:0005905(coated pit)|GO:0006954(inflammatory response)…	"Homo sapiens selectin E (SELE), mRNA [NM_000450]"	chr1:169692108-169692049	hs|1q24.2	GATGTGATAAGGATCAGAACAGCAGAGGTTCTTTTAAAGGGGCAGAAAAACTCTGGGAAA	heterophilic cell-cell adhesion
A_23_P55586	6.57259	6.57259	2.71646	up	19.6853	83.0477	-6.73384	-4.01737	Not Detected	Detected	0	NM_031891	NM_031891	NM_031891	Hs.671510	28316	CDH20	"cadherin 20, type 2"	ENST00000536675	THC2486781	GO:0005509(calcium ion binding)|GO:0005886(plasma membrane)|GO:0007156(homophilic cell adhesion)|GO:0016021(integral to membrane)	"Homo sapiens cadherin 20, type 2 (CDH20), mRNA [NM_031891]"	chr18:59222285-59222344	hs|18q21.33	TACAGAGATGCCAATTGAAAGCAGAAAGTTCTACTCTCGTATCTGTTTTTTATCTTATCT	homophilic cell adhesion
A_24_P282416	3.23843	3.23843	1.69529	up	173.08	359.772	-3.59759	-1.9023	Detected	Detected	0	NM_007313	NM_007313	NM_007313	Hs.431048	25	ABL1	"ABL proto-oncogene 1, non-receptor tyrosine kinase"	ENST00000372348	THC2632391	"GO:0000287(magnesium ion binding)|GO:0001922(B-1 B cell homeostasis)|GO:0002322(B cell proliferation involved in immune response)|GO:0002333(transitional one stage B cell differentiation)|GO:0003677(DNA binding)|GO:0003785(actin monomer binding)|GO:0004515(nicotinate-nucleotide adenylyltransferase activity)|GO:0004672(protein kinase activity)|GO:0004713(protein tyrosine kinase activity)|GO:00047…	"Homo sapiens ABL proto-oncogene 1, non-receptor tyrosine kinase (ABL1), transcript variant b, mRNA [NM_007313]"	chr9:133589580-133589639	hs|9q34.12	TCAATTGCTGACTTGTGGAGATGCAGCGAATGTGAAATCCCACGTATATGCCATTTCCCT	regulation of cell adhesion
A_33_P3214690	9.80054	9.80054	3.29286	up	63.6117	400.161	-5.04167	-1.74881	Detected	Detected	0	NM_014932	NM_014932	NM_014932	Hs.478289	22871	NLGN1	neuroligin 1	ENST00000401917	THC2473172	"GO:0002087(regulation of respiratory gaseous exchange by neurological system process)|GO:0004872(receptor activity)|GO:0005615(extracellular space)|GO:0005887(integral to plasma membrane)|GO:0006605(protein targeting)|GO:0007157(heterophilic cell-cell adhesion)|GO:0007158(neuron cell-cell adhesion)|GO:0007399(nervous system development)|GO:0007416(synapse assembly)|GO:0008152(metabolic process)|…	"Homo sapiens neuroligin 1 (NLGN1), mRNA [NM_014932]"	chr3:173998992-173999051	hs|3q26.31	ATTCAGCCCTTACACACATTCAATACATTTACTGGAGGACAGAACAATACTCTGCCCCAT	cell adhesion molecule binding
A_23_P7835	16.8845	16.8845	4.07763	up	12.5315	135.812	-7.3854	-3.30778	Not Detected	Detected	0	NM_004440	NM_004440	NM_004440	Hs.73962	2045	EPHA7	EPH receptor A7	ENST00000369303	THC2473224	GO:0004713(protein tyrosine kinase activity)|GO:0005004(GPI-linked ephrin receptor activity)|GO:0005515(protein binding)|GO:0005524(ATP binding)|GO:0005886(plasma membrane)|GO:0005887(integral to plasma membrane)|GO:0007411(axon guidance)|GO:0007420(brain development)|GO:0008046(axon guidance receptor activity)|GO:0016310(phosphorylation)|GO:0018108(peptidyl-tyrosine phosphorylation)|GO:0022407(r…	"Homo sapiens EPH receptor A7 (EPHA7), transcript variant 1, mRNA [NM_004440]"	chr6:93952057-93951998	hs|6q16.1	GGGGCAGTTCACAATTTTCACCATTTAAACACAAATTTGCTGCACAGAATATCACCATTG	regulation of cell-cell adhesion
A_24_P923251	3.27469	3.27469	1.71136	up	3901.17	8199.99	0.896805	2.60817	Detected	Detected	0	NM_198951	NM_198951	NM_198951	Hs.517033	7052	TGM2	transglutaminase 2	ENST00000468262	THC2659478	GO:0001974(blood vessel remodeling)|GO:0003810(protein-glutamine gamma-glutamyltransferase activity)|GO:0005515(protein binding)|GO:0005525(GTP binding)|GO:0005739(mitochondrion)|GO:0005829(cytosol)|GO:0005886(plasma membrane)|GO:0005925(focal adhesion)|GO:0018153(isopeptide cross-linking via N6-(L-isoglutamyl)-L-lysine)|GO:0019904(protein domain specific binding)|GO:0032471(reduction of endoplas…	"Homo sapiens transglutaminase 2 (TGM2), transcript variant 2, mRNA [NM_198951]"	chr20:36766505-36766446	hs|20q11.23	TGTGTTCCTGGAGCATTTGTTGACCGCCAACTGACATCATGCTAGGTAGTGACCTAACCA	positive regulation of cell adhesion
A_33_P3325748	3.67432	3.67432	1.87748	up	1258.72	2968.61	-0.735147	1.14233	Detected	Detected	0	NM_138632	NM_138632	NM_138632	Hs.533030	11078	TRIOBP	TRIO and F-actin binding protein	ENST00000407319	THC2477785	GO:0005634(nucleus)|GO:0005737(cytoplasm)|GO:0005815(microtubule organizing center)|GO:0005925(focal adhesion)|GO:0007067(mitosis)|GO:0015629(actin cytoskeleton)|GO:0017049(GTP-Rho binding)|GO:0030047(actin modification)|GO:0030496(midbody)|GO:0031625(ubiquitin protein ligase binding)|GO:0045159(myosin II binding)|GO:0051015(actin filament binding)|GO:0051016(barbed-end actin filament capping)|GO…	"Homo sapiens TRIO and F-actin binding protein (TRIOBP), transcript variant 2, mRNA [NM_138632]"	chr22:38155900-38155959	hs|22q13.1	TACCAATAAAAACAATGCTTAGTACACAATTTACAAATAAAAATATATAATTTTATTGTG	positive regulation of substrate adhesion-dependent cell spreading
A_33_P3372840	3.10464	3.10464	1.63443	up	49.5492	98.7406	-5.4021	-3.76767	Not Detected	Detected	0	NM_001033886	NM_001033886	NM_001033886	Hs.522891	6387	CXCL12	chemokine (C-X-C motif) ligand 12	ENST00000374426	THC2490444	GO:0001569(patterning of blood vessels)|GO:0001666(response to hypoxia)|GO:0001667(ameboidal cell migration)|GO:0001764(neuron migration)|GO:0001938(positive regulation of endothelial cell proliferation)|GO:0005102(receptor binding)|GO:0005576(extracellular region)|GO:0005615(extracellular space)|GO:0006874(cellular calcium ion homeostasis)|GO:0006935(chemotaxis)|GO:0006955(immune response)|GO:00…	"Homo sapiens chemokine (C-X-C motif) ligand 12 (CXCL12), transcript variant 3, mRNA [NM_001033886]"	chr10:44871424-44871365	hs|10q11.21	AGAAGAAGAGAAAGGCTGCCCAGAAAAGGAAAAACTAGTTATCTGCCACCTCGAGATGGA	cell adhesion
A_33_P3422030	22.3326	22.3326	4.48108	up	12.1034	173.497	-7.43555	-2.95447	Not Detected	Detected	0	ENST00000392218				53827	FXYD5	FXYD domain containing ion transport regulator 5	ENST00000392218		GO:0003779(actin binding)|GO:0005216(ion channel activity)|GO:0016021(integral to membrane)|GO:0030033(microvillus assembly)|GO:0034220(ion transmembrane transport)|GO:0045296(cadherin binding)|GO:0046588(negative regulation of calcium-dependent cell-cell adhesion)	FXYD domain containing ion transport regulator 5 [Source:HGNC Symbol;Acc:HGNC:4029] [ENST00000392218]	chr19:35650773-35650832	hs|19q13.12	ACAATACAGGGCAAAGGACATGCATGCTTAATGTTTTAAAATTTGCCCTCCTGCCGCCCA
A_23_P95060	3.727	3.727	1.89801	up	244.437	584.755	-3.09957	-1.20155	Detected	Detected	0	NM_004443	NM_004443	NM_004443	Hs.2913	2049	EPHB3	EPH receptor B3	ENST00000330394	THC2464788	GO:0001525(angiogenesis)|GO:0001655(urogenital system development)|GO:0005003(ephrin receptor activity)|GO:0005524(ATP binding)|GO:0005576(extracellular region)|GO:0005829(cytosol)|GO:0005886(plasma membrane)|GO:0005887(integral to plasma membrane)|GO:0007411(axon guidance)|GO:0007413(axonal fasciculation)|GO:0008046(axon guidance receptor activity)|GO:0016477(cell migration)|GO:0018108(peptidyl-…	"Homo sapiens EPH receptor B3 (EPHB3), mRNA [NM_004443]"	chr3:184299825-184299884	hs|3q27.1	AACTGGAGGAGGGGACTCCAGGAATGGGGAAATGTGACACCACCATCCTGAAGCCAGCTT
A_23_P113005	3.30047	3.30047	1.72267	up	816.009	1728.69	-1.36045	0.362223	Detected	Detected	0	NM_004428	NM_004428	NM_004428	Hs.516664	1942	EFNA1	ephrin-A1	ENST00000469878	THC2506968	GO:0000122(negative regulation of transcription from RNA polymerase II promoter)|GO:0000187(activation of MAPK activity)|GO:0001525(angiogenesis)|GO:0003180(aortic valve morphogenesis)|GO:0003183(mitral valve morphogenesis)|GO:0003199(endocardial cushion to mesenchymal transition involved in heart valve formation)|GO:0005102(receptor binding)|GO:0005515(protein binding)|GO:0005576(extracellular r…	"Homo sapiens ephrin-A1 (EFNA1), transcript variant 1, mRNA [NM_004428]"	chr1:155106767-155106826	hs|1q22	ATGGAGAAAGAAGTGGAGACAGTCCTTTCCCACCATTCCTGCCTTTAAGCCAAAGAAACA
A_19_P00811717	9.30101	9.30101	3.21739	up	12.2054	72.8666	-7.42344	-4.20606	Not Detected	Detected	0	ENST00000488386	XM_005250224	XM_005250224	Hs.150120	222256	CDHR3	cadherin-related family member 3	ENST00000488386	NP1190475	GO:0005509(calcium ion binding)|GO:0005886(plasma membrane)|GO:0007156(homophilic cell adhesion)|GO:0016021(integral to membrane)	cadherin-related family member 3 [Source:HGNC Symbol;Acc:HGNC:26308] [ENST00000488386]	chr7:105517644-105517703	hs|7q22.3	ATTCTGCAGTTGTTGCTCTAGGAGCTGAAACCAGTGGGTAGATGTCGTTCTGAAACGCAG
A_24_P299474	2.98192	2.98192	1.57624	up	4457.3	8531.3	1.08907	2.66531	Detected	Detected	0	NM_001122679	NM_001122679	NM_001122679	Hs.631957	57451	TENM2	teneurin transmembrane protein 2	ENST00000545108	THC2612429	"GO:0000122(negative regulation of transcription from RNA polymerase II promoter)|GO:0005102(receptor binding)|GO:0005515(protein binding)|GO:0005634(nucleus)|GO:0005783(endoplasmic reticulum)|GO:0005794(Golgi apparatus)|GO:0005886(plasma membrane)|GO:0005887(integral to plasma membrane)|GO:0005911(cell-cell junction)|GO:0006351(transcription, DNA-dependent)|GO:0007157(heterophilic cell-cell adhe…	"Homo sapiens teneurin transmembrane protein 2 (TENM2), mRNA [NM_001122679]"	chr5:167690063-167690122	hs|5q34	CACACACAATGTTCCAAGTTCCCCTAAAATATGACCCACTTGTTCTGGGTCTACGCAGAA
A_33_P3390172	10.5062	10.5062	3.39317	up	12.1147	81.6968	-7.4342	-4.04103	Not Detected	Detected	0	NM_001145271	NM_001145271	NM_001145271	Hs.521459	27299	ADAMDEC1	"ADAM-like, decysin 1"	ENST00000520193	THC2467041	GO:0004222(metalloendopeptidase activity)|GO:0005575(cellular_component)|GO:0005576(extracellular region)|GO:0006508(proteolysis)|GO:0006955(immune response)|GO:0007162(negative regulation of cell adhesion)|GO:0008270(zinc ion binding)	"Homo sapiens ADAM-like, decysin 1 (ADAMDEC1), transcript variant 2, mRNA [NM_001145271]"	chr8:24259534-24259593	hs|8p21.2	ATAATGACAACACCAGTGTGTGGGAACCACCTTCTAGAAGTGGGAGAAGACTGTGATTGT
A_33_P3327277	3.07515	3.07515	1.62066	up	118.058	233.028	-4.14954	-2.52888	Detected	Detected	0	NM_001272046	NM_001272046	NM_001272046	Hs.197741	340706	VWA2	von Willebrand factor A domain containing 2	ENST00000603594	THC2480326	GO:0005604(basement membrane)|GO:0005615(extracellular space)|GO:0007161(calcium-independent cell-matrix adhesion)|GO:0042802(identical protein binding)|GO:0046626(regulation of insulin receptor signaling pathway)|GO:0051260(protein homooligomerization)|GO:0070062(extracellular vesicular exosome)	"Homo sapiens von Willebrand factor A domain containing 2 (VWA2), mRNA [NM_001272046]"	chr10:116049061-116049120	hs|10q25.3	AGAGGATGCAGCCGTTCCTGCCCAGAAGCTGAGGAACAATGGCATCTCTGTCTTGGTCGT
A_23_P167920	6.80016	-6.80016	-2.76557	down	490.375	46.2868	-2.09514	-4.86071	Detected	Not Detected	0	NM_005618	NM_005618	NM_005618	Hs.379912	28514	DLL1	delta-like 1 (Drosophila)	ENST00000616526	THC2470707	GO:0001709(cell fate determination)|GO:0001757(somite specification)|GO:0001947(heart looping)|GO:0005112(Notch binding)|GO:0005509(calcium ion binding)|GO:0005515(protein binding)|GO:0005576(extracellular region)|GO:0005886(plasma membrane)|GO:0005887(integral to plasma membrane)|GO:0007219(Notch signaling pathway)|GO:0007220(Notch receptor processing)|GO:0007267(cell-cell signaling)|GO:0007368(…	"Homo sapiens delta-like 1 (Drosophila) (DLL1), mRNA [NM_005618]"	chr6:170591701-170591642	hs|6q27	ATGGGTGAACTGAATTACGCCTAAGAAGCATGCACTGCCTGAGTGTATATTTTGGATTCT
A_24_P173124	5.57228	-5.57228	-2.47827	down	1642.72	189.225	-0.351012	-2.82928	Detected	Detected	0	NM_144997	NM_144997	NM_144997	Hs.31652	201163	FLCN	folliculin	ENST00000285071	THC2473570	GO:0000122(negative regulation of transcription from RNA polymerase II promoter)|GO:0001701(in utero embryonic development)|GO:0001932(regulation of protein phosphorylation)|GO:0001934(positive regulation of protein phosphorylation)|GO:0005515(protein binding)|GO:0005634(nucleus)|GO:0005737(cytoplasm)|GO:0005886(plasma membrane)|GO:0007043(cell-cell junction assembly)|GO:0010629(negative regulati…	"Homo sapiens folliculin (FLCN), transcript variant 1, mRNA [NM_144997]"	chr17:17116193-17116134	hs|17p11.2	GCTGCTTTCAACATTTACGTTTGGTTACAGTTAACTATTTTCGGAGTGTGGTGATTGAAG
A_33_P3386453	2.52882	-2.52882	-1.33846	down	1084.2	275.195	-0.95047	-2.28893	Detected	Detected	0	NM_001030055	NM_001030055	NM_001030055	Hs.592313	394	ARHGAP5	Rho GTPase activating protein 5	ENST00000407916	THC2690895	GO:0002053(positive regulation of mesenchymal cell proliferation)|GO:0003924(GTPase activity)|GO:0005100(Rho GTPase activator activity)|GO:0005515(protein binding)|GO:0005525(GTP binding)|GO:0005737(cytoplasm)|GO:0005829(cytosol)|GO:0007155(cell adhesion)|GO:0007264(small GTPase mediated signal transduction)|GO:0007266(Rho protein signal transduction)|GO:0008152(metabolic process)|GO:0008361(regu…	"Homo sapiens Rho GTPase activating protein 5 (ARHGAP5), transcript variant 1, mRNA [NM_001030055]"	chr14:32623889-32623948	hs|14q12	CAACCTTGATGAGAGCTGATTTTGAAAATCAAGAGTTTCTGTCTACTACTAAGATTCATC
A_23_P75516	3.90633	-3.90633	-1.96581	down	4529.09	744.199	1.11212	-0.853696	Detected	Detected	0	NM_003626	NM_003626	NM_003626	Hs.530749	8500	PPFIA1	"protein tyrosine phosphatase, receptor type, f polypeptide (PTPRF), interacting protein (liprin), alpha 1"	ENST00000532504	THC2610455	GO:0004871(signal transducer activity)|GO:0005515(protein binding)|GO:0005737(cytoplasm)|GO:0005829(cytosol)|GO:0005925(focal adhesion)|GO:0007160(cell-matrix adhesion)|GO:0007165(signal transduction)|GO:0007268(synaptic transmission)|GO:0007269(neurotransmitter secretion)|GO:0014047(glutamate secretion)|GO:0048786(presynaptic active zone)|GO:0051497(negative regulation of stress fiber assembly)|…	"Homo sapiens protein tyrosine phosphatase, receptor type, f polypeptide (PTPRF), interacting protein (liprin), alpha 1 (PPFIA1), transcript variant 2, mRNA [NM_003626]"	chr11:70229626-70229685	hs|11q13.3	TCAAGCAATTGTTGTATTTTCATGACTGACCTTAACTGTACTTTTTCTAGCAAGAGATGC
A_23_P212258	3.88084	-3.88084	-1.95637	down	194.014	32.089	-3.43287	-5.38924	Detected	Not Detected	0	NM_000893	NM_000893	NM_000893	Hs.77741	3827	KNG1	kininogen 1	ENST00000447445	THC2461956	"GO:0002576(platelet degranulation)|GO:0004869(cysteine-type endopeptidase inhibitor activity)|GO:0005102(receptor binding)|GO:0005515(protein binding)|GO:0005576(extracellular region)|GO:0005615(extracellular space)|GO:0005886(plasma membrane)|GO:0006939(smooth muscle contraction)|GO:0006954(inflammatory response)|GO:0007162(negative regulation of cell adhesion)|GO:0007204(elevation of cytosolic…	"Homo sapiens kininogen 1 (KNG1), transcript variant 2, mRNA [NM_000893]"	chr3:186457190-186459356	hs|3q27.3	AACCACTGGGAATGATCTCACTGATGAAAAGGCCTCCAGGTTTTTCACCTTTCCGATCAT
A_23_P121695	3.8728	-3.8728	-1.95338	down	89.7084	14.8681	-4.54572	-6.49909	Detected	Not Detected	0	NM_006419	NM_006419	NM_006419	Hs.100431	10563	CXCL13	chemokine (C-X-C motif) ligand 13	ENST00000286758	THC2465087	GO:0002467(germinal center formation)|GO:0002518(lymphocyte chemotaxis across high endothelial venule)|GO:0002544(chronic inflammatory response)|GO:0002920(regulation of humoral immune response)|GO:0005576(extracellular region)|GO:0005615(extracellular space)|GO:0006954(inflammatory response)|GO:0006955(immune response)|GO:0007166(cell surface receptor signaling pathway)|GO:0007186(G-protein coup…	"Homo sapiens chemokine (C-X-C motif) ligand 13 (CXCL13), mRNA [NM_006419]"	chr4:78532646-78532705	hs|4q21.1	CAAGAGGCAAAGGAATCCATGTAGTAGATATCCTCTGCTTAAAAACTCACTACGGAGGAG
A_33_P3236642	3.25714	-3.25714	-1.7036	down	307.603	60.618	-2.76796	-4.47157	Detected	Not Detected	0	NM_198551	NM_198551	NM_198551	Hs.118474	375056	MIA3	"melanoma inhibitory activity family, member 3"	ENST00000470521	THC2471856	GO:0002063(chondrocyte development)|GO:0002687(positive regulation of leukocyte migration)|GO:0005515(protein binding)|GO:0005789(endoplasmic reticulum membrane)|GO:0006887(exocytosis)|GO:0007162(negative regulation of cell adhesion)|GO:0015031(protein transport)|GO:0016020(membrane)|GO:0016021(integral to membrane)|GO:0030199(collagen fibril organization)|GO:0030336(negative regulation of cell m…	"Homo sapiens melanoma inhibitory activity family, member 3 (MIA3), transcript variant 1, mRNA [NM_198551]"	chr1:222801854-222801913	hs|1q41	CAACAGATTATAGTGACCCTGACAATGTAGATGATGGTCTTTTTATTGTAGACATTCCTA
A_23_P69791	3.25333	-3.25333	-1.70192	down	3153.25	622.126	0.589738	-1.11218	Detected	Detected	0	NM_018569	NM_018569	NM_018569	Hs.435991	55435	AP1AR	adaptor-related protein complex 1 associated regulatory protein	ENST00000309703	THC2485248	"GO:0001920(negative regulation of receptor recycling)|GO:0005769(early endosome)|GO:0005770(late endosome)|GO:0005794(Golgi apparatus)|GO:0015031(protein transport)|GO:0019894(kinesin binding)|GO:0030133(transport vesicle)|GO:0034315(regulation of Arp2/3 complex-mediated actin nucleation)|GO:0034613(cellular protein localization)|GO:0035650(AP-1 adaptor complex binding)|GO:0048203(vesicle target…	"Homo sapiens adaptor-related protein complex 1 associated regulatory protein (AP1AR), transcript variant 1, mRNA [NM_018569]"	chr4:113190479-113190538	hs|4q25	GGCTCCATTGATTTTATTAAGCCTTCCTTTACCTTGTAGTACAAGGTGCTTTAATGGGAT
A_23_P32233	2.96434	-2.96434	-1.56771	down	1116.19	241.689	-0.908522	-2.47623	Detected	Detected	0	NM_004235	NM_004235	NM_004235	Hs.376206	9314	KLF4	Kruppel-like factor 4 (gut)	ENST00000610832	NP1155361	"GO:0000122(negative regulation of transcription from RNA polymerase II promoter)|GO:0000790(nuclear chromatin)|GO:0000987(core promoter proximal region sequence-specific DNA binding)|GO:0001010(sequence-specific DNA binding transcription factor recruiting transcription factor activity)|GO:0001077(RNA polymerase II core promoter proximal region sequence-specific DNA binding transcription factor a…	"Homo sapiens Kruppel-like factor 4 (gut) (KLF4), mRNA [NM_004235]"	chr9:110248108-110248049	hs|9q31.2	CGTTCCAGTGCCAAAAATGCGACCGAGCATTTTCCAGGTCGGACCACCTCGCCTTACACA
A_23_P70213	2.95517	-2.95517	-1.56324	down	321.2	69.7654	-2.70556	-4.2688	Detected	Not Detected	0	NM_000038	NM_000038	NM_000038	Hs.158932	324	APC	adenomatous polyposis coli	ENST00000508376	THC2468407	GO:0000281(cytokinesis after mitosis)|GO:0000776(kinetochore)|GO:0001822(kidney development)|GO:0001942(hair follicle development)|GO:0005515(protein binding)|GO:0005634(nucleus)|GO:0005654(nucleoplasm)|GO:0005737(cytoplasm)|GO:0005813(centrosome)|GO:0005829(cytosol)|GO:0005881(cytoplasmic microtubule)|GO:0005886(plasma membrane)|GO:0005913(cell-cell adherens junction)|GO:0005923(tight junction)|…	"Homo sapiens adenomatous polyposis coli (APC), transcript variant 3, mRNA [NM_000038]"	chr5:112180822-112180881	hs|5q22.2	AACAATTGAAGAAGACTGTTGCCACTTAACCATTCCATGCGTTGGCACTTATCTATTCCT

## Sheet: cell proliferation
ProbeName	FC (abs) [MSC/P/C-h 2:1] vs [MSC]	FC [MSC/P/C-h 2:1] vs [MSC]	Log FC [MSC/P/C-h 2:1] vs [MSC]	Regulation [MSC/P/C-h 2:1] vs [MSC]	MSC:gProcessedSignal(raw)	MSC/P/C-h 2:1:gProcessedSignal(raw)	MSC:gProcessedSignal(normalized)	MSC/P/C-h 2:1:gProcessedSignal(normalized)	MSC:gFEFlags	MSC/P/C-h 2:1:gFEFlags	ControlType	PrimaryAccession	RefSeqAccession	GenbankAccession	UniGeneID	EntrezGeneID	GeneSymbol	GeneName	EnsemblID	TIGRID	GO	Description	GenomicCoordinates	Cytoband	Sequence_x000D_
A_23_P92196	32.7434	32.7434	5.03313	up	12.1582	255.53	-7.42902	-2.39589	Not Detected	Detected	0	NM_032579	NM_032579	NM_032579	Hs.307047	84666	RETNLB	resistin like beta	ENST00000295755	THC2479326	GO:0003674(molecular_function)|GO:0005179(hormone activity)|GO:0005575(cellular_component)|GO:0005576(extracellular region)|GO:0008283(cell proliferation)	"Homo sapiens resistin like beta (RETNLB), mRNA [NM_032579]"	chr3:108475936-108475407	hs|3q13.13	AAGAAGATCAAGGATGTTCTCAACAGTCTAGAGTACAGTCCCTCTCCTATAAGCAAGAAG
A_23_P38537	3.37339	3.37339	1.7542	up	209.948	454.597	-3.319	-1.5648	Detected	Detected	0	NM_005557	NM_005557	NM_005557	Hs.655160	3868	KRT16	"keratin 16, type I"	ENST00000301653	THC2507751	GO:0002009(morphogenesis of an epithelium)|GO:0005200(structural constituent of cytoskeleton)|GO:0005515(protein binding)|GO:0005634(nucleus)|GO:0005856(cytoskeleton)|GO:0005882(intermediate filament)|GO:0006954(inflammatory response)|GO:0007010(cytoskeleton organization)|GO:0007568(aging)|GO:0008283(cell proliferation)|GO:0008544(epidermis development)|GO:0030216(keratinocyte differentiation)|GO…	"Homo sapiens keratin 16, type I (KRT16), mRNA [NM_005557]"	chr17:39767364-39767216	hs|17q21.2	CAGAGAAAAACCGCAGAGACGCTGAGACCTGGTTCCTGAGCAAGACCGAGGAGCTGAACA
A_23_P379475	4.10941	4.10941	2.03893	up	1074.56	2834.38	-0.963354	1.07558	Detected	Detected	0	NM_014762	NM_014762	NM_014762	Hs.498727	1718	DHCR24	24-dehydrocholesterol reductase	ENST00000535035	THC2497269	"GO:0000139(Golgi membrane)|GO:0000246(delta24(24-1) sterol reductase activity)|GO:0005634(nucleus)|GO:0005783(endoplasmic reticulum)|GO:0005789(endoplasmic reticulum membrane)|GO:0005829(cytosol)|GO:0005856(cytoskeleton)|GO:0006695(cholesterol biosynthetic process)|GO:0006915(apoptotic process)|GO:0006979(response to oxidative stress)|GO:0007050(cell cycle arrest)|GO:0007265(Ras protein signal t…	"Homo sapiens 24-dehydrocholesterol reductase (DHCR24), mRNA [NM_014762]"	chr1:55315569-55315510	hs|1p32.3	TTTTCTTTAGAATCAGAATTGTAGCCAGTTTCTTTGGCCAGAAGGATGAATACTTGGATA
A_23_P210763	3.42311	3.42311	1.77531	up	2427.8	5334.33	0.212544	1.98785	Detected	Detected	0	NM_000214	NM_000214	NM_000214	Hs.626544	182	JAG1	jagged 1	ENST00000254958	THC2468282	GO:0001525(angiogenesis)|GO:0001709(cell fate determination)|GO:0001974(blood vessel remodeling)|GO:0002011(morphogenesis of an epithelial sheet)|GO:0002456(T cell mediated immunity)|GO:0003184(pulmonary valve morphogenesis)|GO:0003215(cardiac right ventricle morphogenesis)|GO:0005112(Notch binding)|GO:0005198(structural molecule activity)|GO:0005509(calcium ion binding)|GO:0005515(protein bindin…	"Homo sapiens jagged 1 (JAG1), mRNA [NM_000214]"	chr20:10619120-10619061	hs|20p12.2	AGTAAGGGAACAAGTTGAGCTATGACTTAACATAGCCAAAATGTGAGTGGTTGAATATGA
A_23_P20022	3.1045	3.1045	1.63436	up	41679.8	83054.8	4.31417	5.94854	Detected	Detected	0	NM_013332	NM_013332	NM_013332	Hs.706124	29923	HILPDA	hypoxia inducible lipid droplet-associated	ENST00000466473	THC2461902	GO:0001819(positive regulation of cytokine production)|GO:0005102(receptor binding)|GO:0005515(protein binding)|GO:0005615(extracellular space)|GO:0005811(lipid particle)|GO:0006950(response to stress)|GO:0008284(positive regulation of cell proliferation)|GO:0009986(cell surface)|GO:0010884(positive regulation of lipid storage)|GO:0016021(integral to membrane)|GO:0030141(secretory granule)|GO:003…	"Homo sapiens hypoxia inducible lipid droplet-associated (HILPDA), transcript variant 1, mRNA [NM_013332]"	chr7:128098381-128098440	hs|7q32.1	GGATGCCAAAGCCTGCTCAAGTTATGGACATTGTGGCCACCATGTGGCTTAAATGATTTT
A_24_P282416	3.23843	3.23843	1.69529	up	173.08	359.772	-3.59759	-1.9023	Detected	Detected	0	NM_007313	NM_007313	NM_007313	Hs.431048	25	ABL1	"ABL proto-oncogene 1, non-receptor tyrosine kinase"	ENST00000372348	THC2632391	"GO:0000287(magnesium ion binding)|GO:0001922(B-1 B cell homeostasis)|GO:0002322(B cell proliferation involved in immune response)|GO:0002333(transitional one stage B cell differentiation)|GO:0003677(DNA binding)|GO:0003785(actin monomer binding)|GO:0004515(nicotinate-nucleotide adenylyltransferase activity)|GO:0004672(protein kinase activity)|GO:0004713(protein tyrosine kinase activity)|GO:00047…	"Homo sapiens ABL proto-oncogene 1, non-receptor tyrosine kinase (ABL1), transcript variant b, mRNA [NM_007313]"	chr9:133589580-133589639	hs|9q34.12	TCAATTGCTGACTTGTGGAGATGCAGCGAATGTGAAATCCCACGTATATGCCATTTCCCT
A_23_P427502	16.0888	-16.0888	-4.00798	down	373.385	14.8964	-2.48837	-6.49635	Detected	Not Detected	0	NM_001206998	NM_001206998	NM_001206998	Hs.732114	84133	ZNRF3	zinc and ring finger 3	ENST00000544604	THC2473242	"GO:0004842(ubiquitin-protein ligase activity)|GO:0005109(frizzled binding)|GO:0005515(protein binding)|GO:0005886(plasma membrane)|GO:0005887(integral to plasma membrane)|GO:0006511(ubiquitin-dependent protein catabolic process)|GO:0008270(zinc ion binding)|GO:0016567(protein ubiquitination)|GO:0016874(ligase activity)|GO:0038018(Wnt receptor catabolic process)|GO:0060070(canonical Wnt receptor …	"Homo sapiens zinc and ring finger 3 (ZNRF3), transcript variant 1, mRNA [NM_001206998]"	chr22:29452861-29452920	hs|22q12.1	ACTGCTCACATACTTATGTGCTGCTAGTCTCTACTCGAAGTTCGTGCAGGACTAATGCTT
A_23_P25566	13.7239	-13.7239	-3.77862	down	426.658	19.9549	-2.29595	-6.07457	Detected	Not Detected	0	NM_004951	NM_004951	NM_004951	Hs.784	1880	GPR183	G protein-coupled receptor 183	ENST00000376414	THC2464037	GO:0002313(mature B cell differentiation involved in immune response)|GO:0004930(G-protein coupled receptor activity)|GO:0005886(plasma membrane)|GO:0005887(integral to plasma membrane)|GO:0006955(immune response)|GO:0006959(humoral immune response)|GO:0007186(G-protein coupled receptor signaling pathway)|GO:0008142(oxysterol binding)|GO:0030890(positive regulation of B cell proliferation)|GO:007…	"Homo sapiens G protein-coupled receptor 183 (GPR183), mRNA [NM_004951]"	chr13:99947433-99947374	hs|13q32.3	CTGAAACGGCAAGTCAGTGTATCGATTTCTAGTGCTGTGAAGTCAGCCCCTGAAGAAAAT
A_33_P3317005	8.66679	-8.66679	-3.1155	down	187.675	13.8994	-3.4808	-6.5963	Detected	Not Detected	0	NM_000578	NM_000578	NM_000578	Hs.591607	6556	SLC11A1	"solute carrier family 11 (proton-coupled divalent metal ion transporter), member 1"	ENST00000483487	THC2566353	"GO:0000060(protein import into nucleus, translocation)|GO:0001818(negative regulation of cytokine production)|GO:0001819(positive regulation of cytokine production)|GO:0002309(T cell proliferation involved in immune response)|GO:0002369(T cell cytokine production)|GO:0002606(positive regulation of dendritic cell antigen processing and presentation)|GO:0002827(positive regulation of T-helper 1 ty…	"Homo sapiens solute carrier family 11 (proton-coupled divalent metal ion transporter), member 1 (SLC11A1), mRNA [NM_000578]"	chr2:219249017-219249076	hs|2q35	ATGAGCATTGCTTTCCTGGACCCAGGAAACATCGAGTCAGATCTTCAGGCTGGCGCCGTG
A_21_P0009555	5.30457	-5.30457	-2.40724	down	149.54	18.0948	-3.8085	-6.21574	Detected	Not Detected	0	ENST00000262160				4087	SMAD2	SMAD family member 2	ENST00000262160		"GO:0000122(negative regulation of transcription from RNA polymerase II promoter)|GO:0000790(nuclear chromatin)|GO:0000978(RNA polymerase II core promoter proximal region sequence-specific DNA binding)|GO:0001077(RNA polymerase II core promoter proximal region sequence-specific DNA binding transcription factor activity involved in positive regulation of transcription)|GO:0001657(ureteric bud deve…	SMAD family member 2 [Source:HGNC Symbol;Acc:HGNC:6768] [ENST00000262160]	chr18:45347378-45347319	hs|18q21.1	CTCTTTCAATTTTATTAAGACCAGATCCTTAAAAAGAACCTTGTTCTAACATTGGGGACC
A_23_P79259	4.73463	-4.73463	-2.24325	down	3354.74	454.8	0.679096	-1.56415	Detected	Detected	0	NM_014521	NM_014521	NM_014521	Hs.516777	23677	SH3BP4	SH3-domain binding protein 4	ENST00000409212	THC2765809	GO:0005092(GDP-dissociation inhibitor activity)|GO:0005515(protein binding)|GO:0005634(nucleus)|GO:0005737(cytoplasm)|GO:0005905(coated pit)|GO:0006897(endocytosis)|GO:0008285(negative regulation of cell proliferation)|GO:0010508(positive regulation of autophagy)|GO:0017016(Ras GTPase binding)|GO:0030136(clathrin-coated vesicle)|GO:0030308(negative regulation of cell growth)|GO:0032007(negative r…	"Homo sapiens SH3-domain binding protein 4 (SH3BP4), mRNA [NM_014521]"	chr2:235963306-235963365	hs|2q37.2	TGCTACGAGGCCATTGTACTGTTTTTTCCTTGAGGTCAAAGCAGTGCTTCCCATAGAGTT
