# Supplementary figures and images for: PLGA/chitosan–heparin composite microparticles prepared with microfluidics for the construction of hMSC aggregates
Source: Royal Society of Chemistry journal article supplement (doi:10.1039/d0tb01593h), 2020-01-01

**A**

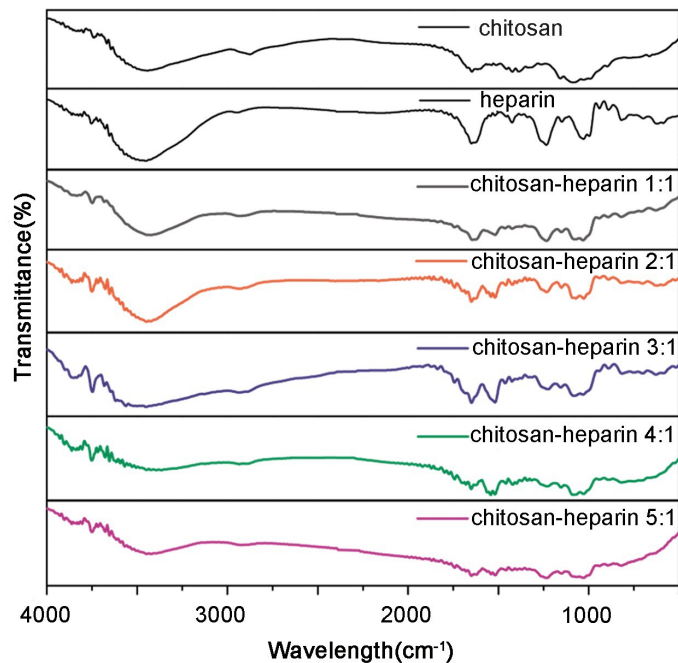

**B**

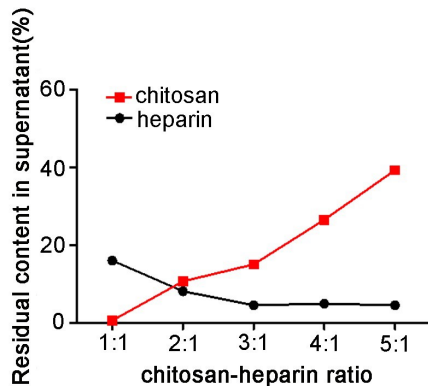

**C**

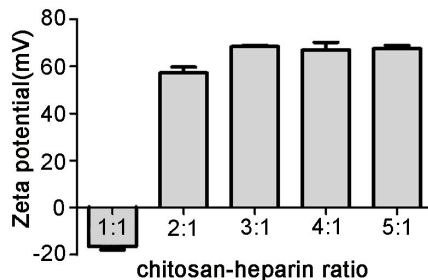

Supplement: d0tb01593h2.pdf [file d0tb01593h2.pdf]
